# Supplementary material for: The impact of COVID-19 on global health journals: an analysis of impact factor and publication trends
Source: HighWire-hosted journal article supplement (doi:10.1136/bmjgh-2022-011514), 2023-04-01
Supplement: bmjgh-2022-011514supp001_data_supplement.pdf [file bmjgh-2022-011514supp001_data_supplement.pdf]

## **Appendix 1**
