# Supplementary material for: The impact of COVID-19 on global health journals: an analysis of impact factor and publication trends
Source: HighWire-hosted journal article supplement (doi:10.1136/bmjgh-2022-011514), 2023-04-01
Supplement: bmjgh-2022-011514supp002_data_supplement.pdf [file bmjgh-2022-011514supp002_data_supplement.pdf]

## Appendix 2: Raw data extracted from the included global health journals

Tables S1-20 (Pages 1-218): Publication list of the included global health journals published in 2020

Table S21 (Pages 219-221): The number of non-COVID-19 publications per month of each included global health journal from Jan.2018 to Jun.2022 for ITSA

Table S22 (Pages 222-224): The number of all publications per month of each included global health journal from Jan.2018 to Jun.2022 for ITSA

**Table S1 List of articles published in *Annals of Global Health* in 2020**

| No. | Title                                                                                                                                                              | COVID-19-related publication = 0<br>non-COVID-19 publication = 1 | Document type | Number of citations in 2021 |
|-----|--------------------------------------------------------------------------------------------------------------------------------------------------------------------|------------------------------------------------------------------|---------------|-----------------------------|
| 1   | Cost-Utility of Intermediate Obstetric Critical Care in a Resource-Limited Setting: A Value-Based Analysis                                                         | 1                                                                | Article       | 2                           |
| 2   | Mental Health Status of Healthcare Workers in China for COVID-19 Epidemic                                                                                          | 0                                                                | Article       | 9                           |
| 3   | Postnatal Outcomes and Risk Factors for In-Hospital Mortality among Asphyxiated Newborns in a Low-Resource Hospital Setting: Experience from North-Central Nigeria | 1                                                                | Article       | 2                           |
| 4   | US Policies Increase Vulnerability of Immigrant Communities to the COVID-19 Pandemic                                                                               | 0                                                                | Letter        | 7                           |
| 5   | Awareness and Knowledge Among Dental and Medical Undergraduate Students Regarding Human Papilloma Virus and Its Available Preventive Measures                      | 1                                                                | Article       | 1                           |
| 6   | Social Integration and Community Health Participation of Elderly Men in Peri-Urban Ecuador                                                                         | 1                                                                | Article       | 0                           |
| 7   | Midwife Led Units: Transforming Maternity Care Globally                                                                                                            | 1                                                                | Article       | 3                           |
| 8   | The Global Burden of Disease Study Estimates of Brazil's Cervical Cancer Burden                                                                                    | 1                                                                | Article       | 0                           |
| 9   | Using a Health Equity Lens to Evaluate Short-Term Experiences in Global Health (STEGH)                                                                             | 1                                                                | Article       | 1                           |
| 10  | Ecology of War, Health Research and Knowledge Subjugation: Insights from the Middle East and North Africa Region                                                   | 1                                                                | Article       | 3                           |
| 11  | Which Country is Truly Developed? COVID-19 has Answered the Question                                                                                               | 0                                                                | Article       | 0                           |

| No. | Title                                                                                                                                                                                                                | COVID-19-related publication = 0<br>non-COVID-19 publication = 1 | Document type | Number of citations in 2021 |
|-----|----------------------------------------------------------------------------------------------------------------------------------------------------------------------------------------------------------------------|------------------------------------------------------------------|---------------|-----------------------------|
| 12  | Integrating Global Health Within Dental Education: Inter-University Collaboration for Scaling Up a Pilot Curriculum                                                                                                  | 1                                                                | Article       | 2                           |
| 13  | Emergency Transportation Interventions for Reducing Adverse Pregnancy Outcomes in Low- and Middle-Income Countries: A Systematic Review                                                                              | 1                                                                | Review        | 1                           |
| 14  | Exposure to Wood Smoke and Associated Health Effects in Sub-Saharan Africa: A Systematic Review                                                                                                                      | 1                                                                | Review        | 15                          |
| 15  | Elevated Levels of Lead (Pb) Identified in Georgian Spices                                                                                                                                                           | 1                                                                | Article       | 1                           |
| 16  | Cancer Risk Studies and Priority Areas for Cancer Risk Appraisal in Uganda                                                                                                                                           | 1                                                                | Review        | 1                           |
| 17  | Prevalence of Type 2 Diabetes Mellitus in Adult Population of Pakistan: A Meta-Analysis of Prospective Cross-Sectional Surveys                                                                                       | 1                                                                | Review        | 8                           |
| 18  | Female Sex Workers' Experiences of Violence and Substance Use on the Haitian, Dominican Republic Border                                                                                                              | 1                                                                | Article       | 2                           |
| 19  | Sharing Solidarity Experiences to Overcome COVID-19                                                                                                                                                                  | 0                                                                | Letter        | 7                           |
| 20  | Changing the COVID-19 Narrative in Africa: Using an Implementation Research Lens to Understand Successes and Plan for Challenges Ahead                                                                               | 0                                                                | Article       | 3                           |
| 21  | The Looming Dangers of Explosion in Community Transmissions of COVID-19 in Nigeria                                                                                                                                   | 0                                                                | Article       | 1                           |
| 22  | Evaluating Attitudes Towards Patient Care and Operations at Korle-Bu Outpatient Clinic                                                                                                                               | 1                                                                | Article       | 0                           |
| 23  | COVID-19: How to Reduce Some Environmental and Social Impacts?                                                                                                                                                       | 0                                                                | Article       | 0                           |
| 24  | A Global View on Prevalence of Hypertension and Human Develop Index                                                                                                                                                  | 1                                                                | Article       | 5                           |
| 25  | The Effects of Live-Fire Drills on Visual and Auditory Cognitive Performance among Firefighters                                                                                                                      | 1                                                                | Article       | 0                           |
| 26  | Eswatini Nursing Council Regulatory Reforms: Process towards Entry to Practice Examination                                                                                                                           | 1                                                                | Article       | 0                           |
| 27  | Developing Ethical and Sustainable Global Health Educational Exchanges for Clinical Trainees: Implementation and Lessons Learned from the 30-Year Academic Model Providing Access to Healthcare (AMPATH) Partnership | 1                                                                | Review        | 1                           |
| 28  | A Case Study of a Point-of-Care Electronic Medical Record [SABER] in Totonicapan, Guatemala: Benefits,                                                                                                               | 1                                                                | Article       | 0                           |

| No. | Title                                                                                                                                                    | COVID-19-related publication = 0<br>non-COVID-19 publication = 1 | Document type | Number of citations in 2021 |
|-----|----------------------------------------------------------------------------------------------------------------------------------------------------------|------------------------------------------------------------------|---------------|-----------------------------|
|     | Challenges, and Future Directions                                                                                                                        |                                                                  |               |                             |
| 29  | Epidemiology and Perioperative Mortality of Exploratory Laparotomy in Rural Ghana                                                                        | 1                                                                | Article       | 1                           |
| 30  | Establishing a Sustainable Training Program for Laparoscopy in Resource-Limited Settings: Experience in Ghana                                            | 1                                                                | Article       | 1                           |
| 31  | Folic Acid Supplement Intake and Risk of Colorectal Cancer in Women; A Case Control Study                                                                | 1                                                                | Article       | 0                           |
| 32  | High Burden of Undernutrition among At-Risk Children in Neonatal Follow-Up Clinic in Rwanda                                                              | 1                                                                | Article       | 0                           |
| 33  | Evaluating the Impact of a School-Based Youth-Led Health Education Program for Adolescent Females in Mumbai, India                                       | 1                                                                | Article       | 3                           |
| 34  | Medical Approach to Refugees: Importance of the Caring Physician                                                                                         | 1                                                                | Article       | 3                           |
| 35  | Caribbean Diaspora Healthy Nutrition Outreach Project (CDHNOP): A Qualitative and Quantitative Approach to Caribbean Health                              | 1                                                                | Article       | 1                           |
| 36  | The Impact of Heavy Load Carrying on Musculoskeletal Pain and Disability Among Women in Shinyanga Region, Tanzania                                       | 1                                                                | Article       | 3                           |
| 37  | Perspectives and Solutions from Clinical Trainees and Mentors Regarding Ethical Challenges During Global Health Experiences                              | 1                                                                | Article       | 3                           |
| 38  | The Comparison of the Adverse Events of Pentavalent Vaccine and DPT Vaccine in 2-6 Months Infants in Iran: A National Study                              | 1                                                                | Article       | 0                           |
| 39  | Addressing Climate Change Communication: Effective Engagement of Populations for Climate Action in the US and Globally                                   | 1                                                                | Article       | 2                           |
| 40  | Susceptibility to Insecticides and Natural Infection in <i>Aedes aegypti</i> : An Initiative to Improve the Mosquito Control Actions in Boyaca, Colombia | 1                                                                | Article       | 1                           |

| No. | Title                                                                                                                                                  | COVID-19-related publication = 0<br>non-COVID-19 publication = 1 | Document type | Number of citations in 2021 |
|-----|--------------------------------------------------------------------------------------------------------------------------------------------------------|------------------------------------------------------------------|---------------|-----------------------------|
| 41  | Haematological Parameters and Spleen Rate of Asymptomatic and Malaria Negative Children in Edo South District, Nigeria                                 | 1                                                                | Article       | 5                           |
| 42  | Schistosomiasis Control in Nigeria: Moving Round the Circle?                                                                                           | 1                                                                | Article       | 1                           |
| 43  | Global Prevalence and Device Related Causes of Needle Stick Injuries among Health Care Workers: A Systematic Review and Meta-Analysis                  | 1                                                                | Review        | 19                          |
| 44  | Double Burden of COVID-19 Pandemic and Military Occupation: Mental Health Among a Palestinian University Community in the West Bank                    | 0                                                                | Article       | 5                           |
| 45  | Medical Education in the Former Soviet Union: Opportunities in Armenia                                                                                 | 1                                                                | Article       | 0                           |
| 46  | Assessment of Acute Obstetrical Needs and the Potential Utility of Point-Of-Care Ultrasound in the North East Region of Haiti: A Cross-Sectional Study | 1                                                                | Article       | 1                           |
| 47  | Litigation to Access Health Services: Ally or Enemy of Global Public Health?                                                                           | 1                                                                | Review        | 0                           |
| 48  | An International Partnership of 12 Anatomy Departments - Improving Global Health through Internationalization of Medical Education                     | 1                                                                | Article       | 4                           |
| 49  | A Low-Cost Humidity Control System to Protect Microscopes in a Tropical Climate                                                                        | 1                                                                | Article       | 0                           |
| 50  | Emergency Medicine Training Programs in Low- and Middle-Income Countries: A Systematic Review                                                          | 1                                                                | Review        | 5                           |
| 51  | Partnership and Participation-A Social Network Analysis of the 2017 Global Fund Application Process in the Democratic Republic of the Congo and Uganda | 1                                                                | Article       | 0                           |
| 52  | Lead Concentrations in Mexican Candy: A Follow-Up Report                                                                                               | 1                                                                | Article       | 0                           |
| 53  | Rapid Review to Inform the Rehabilitation and Reintegration of Child Returnees from the Islamic State                                                  | 1                                                                | Review        | 1                           |
| 54  | VIEWPOINT Changing the Narrative for Nursing Globally                                                                                                  | 1                                                                | Article       | 1                           |
| 55  | Practices and Perspectives of Traditional Bone Setters in Northern Tanzania                                                                            | 1                                                                | Article       | 3                           |

| No. | Title                                                                                                                                             | COVID-19-related publication = 0<br>non-COVID-19 publication = 1 | Document type      | Number of citations in 2021 |
|-----|---------------------------------------------------------------------------------------------------------------------------------------------------|------------------------------------------------------------------|--------------------|-----------------------------|
| 56  | Associations of Occupational, Socio-Demographic and Lifestyle Factors with Lung Functions in Malaysian Traffic Policemen                          | 1                                                                | Article            | 1                           |
| 57  | Prevalence and Associated Factors of Diabetes Mellitus in Hosanna Town, Southern Ethiopia                                                         | 1                                                                | Article            | 3                           |
| 58  | Diabetic Microvascular Complications Among Children and Adolescents in Northwestern Tanzania: A Cross-Sectional Study                             | 1                                                                | Article            | 1                           |
| 59  | An Approach to Building Equitable Global Health Research Collaborations                                                                           | 1                                                                | Editorial Material | 1                           |
| 60  | Building Career Development Skills for Researchers: A Qualitative Study Across Four African Countries                                             | 1                                                                | Article            | 1                           |
| 61  | How Frequently Do We Touch Facial T-Zone: A Systematic Review                                                                                     | 1                                                                | Review             | 6                           |
| 62  | Mitigating Global Oral Health Inequalities: Research Training Programs in Low- and Middle-Income Countries                                        | 1                                                                | Article            | 1                           |
| 63  | Nationalizing Operational Research Capacity Building: Necessity or Luxury?                                                                        | 1                                                                | Editorial Material | 1                           |
| 64  | Evidence of COVID-19 Impacts on Occupations During the First Vietnamese National Lockdown                                                         | 0                                                                | Article            | 19                          |
| 65  | Evaluation of a Ten-Year Team-Based Collaborative Capacity-Building Program for Pediatric Cardiac Surgery in Uzbekistan: Lessons and Implications | 1                                                                | Article            | 0                           |
| 66  | Searching for Digital Technologies in Containment and Mitigation Strategies: Experience from South Korea COVID-19                                 | 0                                                                | Article            | 3                           |
| 67  | Practical and Ethical Solutions for Remote Applied Learning Experiences in Global Health                                                          | 1                                                                | Article            | 0                           |
| 68  | Prevalence, Predictors, and Characteristics of Waterpipe Smoking Among Jazan University Students in Saudi Arabia: A Cross-Sectional Study         | 1                                                                | Article            | 0                           |
| 69  | Challenges Faced by Rohingya Refugees in the COVID-19 Pandemic                                                                                    | 0                                                                | Article            | 4                           |
| 70  | COVID-19 Outbreak, Mitigation, and Governance in High Prevalent Countries                                                                         | 0                                                                | Article            | 3                           |
| 71  | Building Master Trainers to Facilitate Sexual Violence Prevention: A Pilot Study in Ghana                                                         | 1                                                                | Article            | 1                           |

| No. | Title                                                                                                                        | COVID-19-related publication = 0<br>non-COVID-19 publication = 1 | Document type      | Number of citations in 2021 |
|-----|------------------------------------------------------------------------------------------------------------------------------|------------------------------------------------------------------|--------------------|-----------------------------|
| 72  | Rio Birth Cohort Study on Environmental Exposure and Childhood Development - PIPA Project                                    | 1                                                                | Article            | 5                           |
| 73  | Factors Associated with Loss to Follow-up among Cervical Cancer Patients in Rwanda                                           | 1                                                                | Article            | 0                           |
| 74  | Level of Knowledge on Stroke and Associated Factors: A Cross-Sectional Study at Primary Health Care Centers in Morocco       | 1                                                                | Article            | 1                           |
| 75  | Postoperative Rheumatic Heart Disease Follow-Up: Creating a National Registry and First Results from Rwanda                  | 1                                                                | Article            | 2                           |
| 76  | Integration of Chronic Oncology Services in Noncommunicable Disease Clinic in Rural Rwanda                                   | 1                                                                | Article            | 1                           |
| 77  | Dwelling Characteristics Influence Indoor Temperature and May Pose Health Threats in LMICs                                   | 1                                                                | Article            | 2                           |
| 78  | Developing Strategies for Sustainable Medical Equipment Maintenance in Under-Resourced Settings                              | 1                                                                | Editorial Material | 1                           |
| 79  | Pyrethroid Insecticides in Households from Urban Areas: An Association of the 3-PBA Metabolite and Hand Wipes                | 1                                                                | Article            | 0                           |
| 80  | Enhancing Knowledge in Informal Settlements: Assessing Health Beliefs and Behaviors in Nigeria                               | 1                                                                | Article            | 0                           |
| 81  | Provision of Care to Preterm Infants at Resource Limited Health Facilities of Mopani District, South Africa                  | 1                                                                | Article            | 2                           |
| 82  | Agile Application of Digital Health Interventions during the COVID-19 Refugee Response                                       | 0                                                                | Article            | 1                           |
| 83  | Diabetes: What Challenges Lie Ahead for Vietnam?                                                                             | 1                                                                | Review             | 6                           |
| 84  | Identifying Perceived Barriers to Human Papillomavirus Vaccination as a Preventative Strategy for Cervical Cancer in Nigeria | 1                                                                | Article            | 0                           |
| 85  | Global Health and Public Health Majors and Minors at 411 Universities, 2019-2020                                             | 1                                                                | Article            | 0                           |
| 86  | COVID-19 in the Americas: Who's Looking After Refugees and Migrants?                                                         | 0                                                                | Editorial Material | 5                           |
| 87  | COVID-19-The Availability of ICU Beds in Brazil during the Onset of Pandemic                                                 | 0                                                                | Article            | 9                           |
| 88  | Developing and Implementing the Family Nurse Practitioner Role in Eswatini: Implications for Education, Practice, and Policy | 1                                                                | Article            | 1                           |
| 89  | Assessing Providers' Approach to Hypertension Management at a Large, Private Hospital in Kampala, Uganda                     | 1                                                                | Article            | 3                           |

| No. | Title                                                                                                                                      | COVID-19-related publication = 0<br>non-COVID-19 publication = 1 | Document type      | Number of citations in 2021 |
|-----|--------------------------------------------------------------------------------------------------------------------------------------------|------------------------------------------------------------------|--------------------|-----------------------------|
| 90  | Emergency Department Design in Low- and Middle-Income Settings: Lessons from a University Hospital in Haiti                                | 1                                                                | Article            | 0                           |
| 91  | Household Income, Food Insecurity and Nutritional Status of Migrant Workers in Klang Valley, Malaysia                                      | 1                                                                | Article            | 1                           |
| 92  | Risk Factors of Respiratory Diseases Among Neonates in Neonatal Intensive Care Unit of Qena University Hospital, Egypt                     | 1                                                                | Article            | 6                           |
| 93  | Vaccination Status and Associated Factors among Street Children 9-24 Months Old in Sidama Region, Ethiopia                                 | 1                                                                | Article            | 1                           |
| 94  | Assessing the Risk of HIV and Hepatitis C among Internally Displaced Persons in Georgia                                                    | 1                                                                | Review             | 0                           |
| 95  | Reviewing COVID-19 Modelling amidst Recent United States Protests                                                                          | 0                                                                | Letter             | 1                           |
| 96  | Improving the Caesarean Decision by Robson Classification: A Population-Based Study by 5,323,500 Livebirth Data                            | 1                                                                | Article            | 2                           |
| 97  | Spatiality in Health: The Distribution of Health Conditions Associated with Electronic Waste Processing Activities at Agbogbloshie, Accra  | 1                                                                | Article            | 2                           |
| 98  | Improving Child Survival in Sub-Saharan Africa: Key Environmental and Nutritional Interventions                                            | 1                                                                | Article            | 0                           |
| 99  | Evaluation of Peruvian Government Interventions to Reduce Childhood Anemia                                                                 | 1                                                                | Article            | 0                           |
| 100 | Rethinking the COVID-19 Pandemic: Back to Public Health                                                                                    | 0                                                                | Article            | 1                           |
| 101 | Health Disparities: A Perspective on Internal Migration and Health Behavior in Sudan                                                       | 1                                                                | Article            | 2                           |
| 102 | Prevalence of Typhoid and Paratyphoid Fever in the Hohoe Municipality of the Volta Region, Ghana: A Five-Year Retrospective Trend Analysis | 1                                                                | Article            | 1                           |
| 103 | A Mechanism for Reviewing Investments in Health Research Capacity Strengthening in Low- and Middle-Income Countries                        | 1                                                                | Editorial Material | 5                           |
| 104 | Nurse Expertise: A Critical Resource in the COVID-19 Pandemic Response                                                                     | 0                                                                | Editorial Material | 24                          |
| 105 | Presentation of Pediatric Unintentional Injuries at Rural Hospitals in Rwanda: A Retrospective Study                                       | 1                                                                | Article            | 1                           |
| 106 | Changing Patterns in Epidemiology of Malaria Between 2006 and 2018 in the South of Fars Province, Southern Iran:                           | 1                                                                | Article            | 2                           |

| No. | Title                                                                                                                                                                                       | COVID-19-related publication = 0<br>non-COVID-19 publication = 1 | Document type      | Number of citations in 2021 |
|-----|---------------------------------------------------------------------------------------------------------------------------------------------------------------------------------------------|------------------------------------------------------------------|--------------------|-----------------------------|
|     | The Fall and Rise of Malaria                                                                                                                                                                |                                                                  |                    |                             |
| 107 | Evaluating and Improving upon Ecuador's Adolescent Pregnancy Prevention Policies in an Era of Increased Urgency                                                                             | 1                                                                | Editorial Material | 2                           |
| 108 | Point-of-Care Tests for Hepatitis B Are Associated with A Higher Linkage to Care and Lower Cost Compared to Venepuncture Sampling During Outreach Screenings in an Asian Migrant Population | 1                                                                | Article            | 5                           |
| 109 | Graduate Midwifery Education in Uganda Aiming to Improve Maternal and Newborn Health Outcomes                                                                                               | 1                                                                | Article            | 2                           |
| 110 | Commentary: As the Oceans Go, So Too Do We                                                                                                                                                  | 1                                                                | Editorial Material | 0                           |
| 111 | Influence of Caretakers' Health Literacy on Delays to Traumatic Brain Injury Care in Uganda                                                                                                 | 1                                                                | Article            | 0                           |
| 112 | Perceived Health System Barriers to Tuberculosis Control Among Health Workers in South Africa                                                                                               | 1                                                                | Article            | 4                           |
| 113 | Reproductive Healthcare Needs of Sex Workers in Rural South Africa: A Community Assessment                                                                                                  | 1                                                                | Article            | 0                           |
| 114 | Validation of Whole Blood Rapid Diagnosis Test for Hepatitis B                                                                                                                              | 1                                                                | Letter             | 0                           |
| 115 | Lived Experiences and Technological Literacy of Heart Failure Patients and Clinicians at a Cardiac Care Centre in Uganda                                                                    | 1                                                                | Article            | 0                           |
| 116 | Risk Factors for Stunting in Children under the Age of 5 in Rural Guatemalan Highlands                                                                                                      | 1                                                                | Article            | 0                           |
| 117 | Epidemiologic Profile of Overweight and Obesity in Abidjan, Ivory Coast: A Cross-Sectional Study                                                                                            | 1                                                                | Article            | 0                           |
| 118 | Sexual Health of Haitian Immigrants in Southern Brazil: A Cross-Sectional Study                                                                                                             | 1                                                                | Article            | 0                           |
| 119 | Primary Care 2030: Creating an Enabling Ecosystem for Disruptive Primary Care Models to Achieve Universal Health Coverage in Low- and Middle-Income Countries                               | 1                                                                | Article            | 2                           |
| 120 | Unblocking Barriers of Access to Hepatitis C Treatment in China: Lessons Learned from Tianjin                                                                                               | 1                                                                | Article            | 2                           |
| 121 | Research Capacity and Training Needs for Cancer in Conflict-Affected MENA Countries                                                                                                         | 1                                                                | Article            | 0                           |
| 122 | Expanding Global Rehabilitation Services through International Academic-Community Partnerships                                                                                              | 1                                                                | Article            | 0                           |
| 123 | Human Health and Ocean Pollution                                                                                                                                                            | 1                                                                | Review             | 31                          |



| No. | Title                                                                                                                                                                                     | COVID-19-related publication = 0<br>non-COVID-19 publication = 1 | Document type | Number of citations in 2021 |
|-----|-------------------------------------------------------------------------------------------------------------------------------------------------------------------------------------------|------------------------------------------------------------------|---------------|-----------------------------|
| 124 | Simple Questionnaires to Improve Pooling Strategies for SARS-CoV-2 Laboratory Testing                                                                                                     | 0                                                                | Article       | 3                           |
| 125 | Medical Student Involvement in a Human Rights Program: Impact on Student Development and Career Vision                                                                                    | 1                                                                | Article       | 0                           |
| 126 | Population and Individual-Level Double Burden of Malnutrition Among Adolescents in Two Emerging Cities in Northern and Southern Nigeria: A Comparative Cross-Sectional Study              | 1                                                                | Article       | 0                           |
| 127 | Impact of the Fogarty Training Program on Trainee and Institutional Research Capacity Building at a Government Medical College in India                                                   | 1                                                                | Article       | 0                           |
| 128 | Radiographic Changes in Colombian Asbestos Factory Workers                                                                                                                                | 1                                                                | Article       | 0                           |
| 129 | Key Considerations for Successful Risk Communication and Community Engagement (RCCE) Programmes During COVID-19 Pandemic and Other Public Health Emergencies                              | 0                                                                | Article       | 3                           |
| 130 | Prevalence of Cervical Cancer Screening and Awareness among Women in an Urban Community in South India-A Cross Sectional Study                                                            | 1                                                                | Article       | 7                           |
| 131 | Survival Rate of Prostate Cancer in Asian Countries: A Systematic Review and Meta-Analysis                                                                                                | 1                                                                | Review        | 7                           |
| 132 | The Effect of Pediatric Colorectal Short-Term Medical Service Trips on Self-Reported Confidence in Patient Care in Volunteers in the Home Country                                         | 1                                                                | Article       | 1                           |
| 133 | Contingency Nursing Management in Designated Hospitals During COVID-19 Outbreak                                                                                                           | 0                                                                | Review        | 13                          |
| 134 | Comparing Approaches to Research in Global and International Health: An Exploratory Study                                                                                                 | 1                                                                | Article       | 0                           |
| 135 | Annual Primary Care 2030 Convening: Creating an Enabling Ecosystem for Person-Centered Primary Healthcare Models to Achieve Universal Health Coverage in Low- and Middle-Income Countries | 1                                                                | Article       | 1                           |
| 136 | Epidemiological Patterns of Animal Bites in the Najafabad, Center of Iran (2012-2017)                                                                                                     | 1                                                                | Article       | 1                           |
| 137 | Association Between Breastfeeding and Child Stunting in Mexico                                                                                                                            | 1                                                                | Article       | 2                           |
| 138 | Global Health Education Programs in the Americas: A Scoping Review                                                                                                                        | 1                                                                | Review        | 0                           |

| No. | Title                                                                                                                                                                                                        | COVID-19-related publication = 0<br>non-COVID-19 publication = 1 | Document type | Number of citations in 2021 |
|-----|--------------------------------------------------------------------------------------------------------------------------------------------------------------------------------------------------------------|------------------------------------------------------------------|---------------|-----------------------------|
| 139 | Nationwide Hospital-Based Seroprevalence of Hepatitis A and Hepatitis E Virus in Bangladesh                                                                                                                  | 1                                                                | Article       | 2                           |
| 140 | Containing COVID-19: Implementation of Early and Moderately Stringent Social Distancing Measures Can Prevent The Need for Large-Scale Lockdowns                                                              | 0                                                                | Article       | 4                           |
| 141 | Availability, Costs and Stock-Outs of Essential NCD Drugs in Three Rural Rwandan Districts                                                                                                                   | 1                                                                | Article       | 0                           |
| 142 | Adherence to Antihypertensive Medication: An Interview Analysis of Southwest Ugandan Patients' Perspectives                                                                                                  | 1                                                                | Article       | 3                           |
| 143 | 'They Forget I'm Deaf': Exploring the Experience and Perception of Deaf Pregnant Women Attending Antenatal Clinics/Care                                                                                      | 1                                                                | Article       | 3                           |
| 144 | Comparison of Hypertension in Migrant and Local Patients with Atherosclerotic Diseases: A Cross-Sectional Study in Shanghai, China                                                                           | 1                                                                | Article       | 1                           |
| 145 | Curricular Models and Learning Objectives for Undergraduate Minors in Global Health                                                                                                                          | 1                                                                | Article       | 0                           |
| 146 | Implementation, Outputs, and Cost of a National Operational Research Training in Rwanda                                                                                                                      | 1                                                                | Article       | 0                           |
| 147 | 24th Collegium Ramazzini Statement: Prevention of Work-Related Infection in the COVID-19 Pandemic                                                                                                            | 0                                                                | Article       | 3                           |
| 148 | SARS-CoV-2 Infection in Pregnant Women and Their Newborns                                                                                                                                                    | 0                                                                | Letter        | 2                           |
| 149 | Cardiovascular Diseases in Central and Eastern Europe: A Call for More Surveillance and Evidence-Based Health Promotion                                                                                      | 1                                                                | Review        | 12                          |
| 150 | A Catholic Contribution to Global Public Health                                                                                                                                                              | 1                                                                | Article       | 1                           |
| 151 | Efficacy and Safety of Pharmacoinvasive Strategy Compared to Primary Percutaneous Coronary Intervention in the Management of ST-Segment Elevation Myocardial Infarction: A Prospective Country-Wide Registry | 1                                                                | Article       | 1                           |
| 152 | The Perfect Predator: A Scientist's Race to Save Her Husband                                                                                                                                                 | 1                                                                | Book Review   | 0                           |
| 153 | Relative Measures of Association for Binary Outcomes: Challenges and Recommendations for the Global Health Researcher (vol 85, pg 137, 2019)                                                                 | 1                                                                | Correction    | 0                           |

**Data source:** Web of Science

**Table S2 List of articles published in *BMJ Global Health* in 2020**

| No. | Title                                                                                                                                                                                                  | COVID-19-related publication = 0<br>non-COVID-19 publication = 1 | Document type      | Number of citations in 2021 |
|-----|--------------------------------------------------------------------------------------------------------------------------------------------------------------------------------------------------------|------------------------------------------------------------------|--------------------|-----------------------------|
| 1   | Effects of terrorist attacks on access to maternal healthcare services: a national longitudinal study in Burkina Faso                                                                                  | 1                                                                | Article            | 0                           |
| 2   | Reforming the regulation of medical education, professionals and practice in India                                                                                                                     | 1                                                                | Editorial Material | 3                           |
| 3   | Report of the WHO independent high-level commission on NCDs: where is the focus on addressing inequalities?                                                                                            | 1                                                                | Editorial Material | 2                           |
| 4   | Protecting hard-won gains for mothers and newborns in low-income and middle-income countries in the face of COVID-19: call for a service safety net                                                    | 0                                                                | Editorial Material | 16                          |
| 5   | Oxygen provision to fight COVID-19 in sub-Saharan Africa                                                                                                                                               | 0                                                                | Editorial Material | 11                          |
| 6   | Protecting children in low-income and middle-income countries from COVID-19                                                                                                                            | 0                                                                | Editorial Material | 8                           |
| 7   | Country adherence to WHO recommendations to improve the quality of HIV diagnosis: a global policy review                                                                                               | 1                                                                | Review             | 3                           |
| 8   | Weekly iron-folic acid supplements containing 2.8 mg folic acid are associated with a lower risk of neural tube defects than the current practice of 0.4 mg: a randomised controlled trial in Malaysia | 1                                                                | Article            | 2                           |
| 9   | Solving the problem of access to cardiovascular medicines: revolving fund pharmacy models in rural western Kenya                                                                                       | 1                                                                | Article            | 4                           |
| 10  | Media trust and infection mitigating behaviours during the COVID-19 pandemic in the USA                                                                                                                | 0                                                                | Article            | 24                          |
| 11  | Using the Demographic Health Survey wealth index to create family planning market segments based on absolute income levels                                                                             | 1                                                                | Article            | 2                           |
| 12  | What questions we should be asking about COVID-19 in humanitarian settings: perspectives from the Social Sciences Analysis Cell in the Democratic Republic of the Congo                                | 0                                                                | Editorial Material | 4                           |
| 13  | Time to stop the use of 'Wuhan virus', 'China virus' or 'Chinese virus' across the scientific community                                                                                                | 0                                                                | Editorial Material | 9                           |
| 14  | Antibiotic overuse in the primary health care setting: a secondary data analysis of standardised patient studies from India, China and Kenya                                                           | 1                                                                | Article            | 10                          |
| 15  | Mixed-method estimation of population-level HIV viral suppression rate in the Western Cape, South Africa                                                                                               | 1                                                                | Article            | 0                           |

| No. | Title                                                                                                                                                                   | COVID-19-related publication = 0<br>non-COVID-19 publication = 1 | Document type           | Number of citations in 2021 |
|-----|-------------------------------------------------------------------------------------------------------------------------------------------------------------------------|------------------------------------------------------------------|-------------------------|-----------------------------|
| 16  | Does women's mobile phone ownership matter for health? Evidence from 15 countries                                                                                       | 1                                                                | Article                 | 13                          |
| 17  | Global health is more than just 'Public Health Somewhere Else'                                                                                                          | 1                                                                | Editorial Material      | 2                           |
| 18  | Practical actions for fostering cross-disciplinary global health research: lessons from a narrative literature review                                                   | 1                                                                | Review                  | 1                           |
| 19  | Data for tracking SDGs: challenges in capturing neonatal data from hospitals in Kenya                                                                                   | 1                                                                | Article                 | 8                           |
| 20  | Electronic clinical decision support algorithms incorporating point-of-care diagnostic tests in low-resource settings: a target product profile                         | 1                                                                | Article                 | 3                           |
| 21  | Health system determinants of access to essential medicines for children with cancer in Ghana                                                                           | 1                                                                | Article                 | 1                           |
| 22  | Predictors of neonatal mortality: development and validation of prognostic models using prospective data from rural Bangladesh                                          | 1                                                                | Article                 | 1                           |
| 23  | Defining global health as public health somewhere else                                                                                                                  | 1                                                                | Editorial Material      | 5                           |
| 24  | Maternal healthcare coverage for first pregnancies in adolescent girls: a systematic comparison with adult mothers in household surveys across 105 countries, 2000-2019 | 1                                                                | Article                 | 0                           |
| 25  | Country compliance with WHO-recommended antenatal care guidelines: equity analysis of the 2015-2016 Demography and Health Survey in Myanmar                             | 1                                                                | Article                 | 3                           |
| 26  | The multi-sectorial emergency response to a cholera outbreak in Internally Displaced Persons camps in Borno State, Nigeria, 2017                                        | 1                                                                | Article                 | 2                           |
| 27  | Harmonisation of maternal health biorepositories in sub-Saharan Africa                                                                                                  | 1                                                                | Editorial Material      | 0                           |
| 28  | Categorisation and Minoritisation                                                                                                                                       | 1                                                                | Editorial Material      | 5                           |
| 29  | The urgent need for a global commitment to protect healthcare workers                                                                                                   | 1                                                                | Editorial Material      | 1                           |
| 30  | Confronting power in low places: historical analysis of medical dominance and role-boundary negotiation between health professions in Nigeria                           | 1                                                                | Article;<br>Proceedings | 3                           |

| No. | Title                                                                                                                                         | COVID-19-related publication = 0<br>non-COVID-19 publication = 1 | Document type      | Number of citations in 2021 |
|-----|-----------------------------------------------------------------------------------------------------------------------------------------------|------------------------------------------------------------------|--------------------|-----------------------------|
|     |                                                                                                                                               |                                                                  | Paper              |                             |
| 31  | Global health degrees: at what cost?                                                                                                          | 1                                                                | Editorial Material | 7                           |
| 32  | Time to apply a social determinants of health lens to addressing sickle cell disorders in sub-Saharan Africa                                  | 1                                                                | Editorial Material | 4                           |
| 33  | Herpes simplex virus type 1 in Europe: systematic review, meta-analyses and meta-regressions                                                  | 1                                                                | Review             | 7                           |
| 34  | Reforming the World Health Assembly                                                                                                           | 1                                                                | Editorial Material | 0                           |
| 35  | Dependency ratios in healthy ageing                                                                                                           | 1                                                                | Article            | 0                           |
| 36  | The global and regional burden of genital ulcer disease due to herpes simplex virus: a natural history modelling study                        | 1                                                                | Article            | 10                          |
| 37  | Epidemiology of multimorbidity in conditions of extreme poverty: a population-based study of older adults in rural Burkina Faso               | 1                                                                | Article            | 10                          |
| 38  | Enhancing global health engagement in 21st century China                                                                                      | 1                                                                | Editorial Material | 3                           |
| 39  | Is health politically irrelevant? Experimental evidence during a global pandemic                                                              | 1                                                                | Article            | 3                           |
| 40  | Initial success from a public health approach to hepatitis C testing, treatment and cure in seven countries: the road to elimination          | 1                                                                | Article            | 5                           |
| 41  | Effective prevention of intimate partner violence through couples training: a randomised controlled trial of Indashyikirwa in Rwanda          | 1                                                                | Article            | 4                           |
| 42  | Large and persistent subnational inequalities in reproductive, maternal, newborn and child health intervention coverage in sub-Saharan Africa | 1                                                                | Article            | 5                           |
| 43  | Classroom, club or collective? Three types of community-based group intervention and why they matter for health                               | 1                                                                | Article            | 5                           |
| 44  | Containing measles in conflict-driven humanitarian settings                                                                                   | 1                                                                | Editorial Material | 2                           |
| 45  | Establishment of a high-dependency unit in Malawi                                                                                             | 1                                                                | Article            | 2                           |

| No. | Title                                                                                                                                                                                                    | COVID-19-related publication = 0<br>non-COVID-19 publication = 1 | Document type      | Number of citations in 2021 |
|-----|----------------------------------------------------------------------------------------------------------------------------------------------------------------------------------------------------------|------------------------------------------------------------------|--------------------|-----------------------------|
| 46  | Which mechanisms explain motivation the of primary health workers? Insights from the realist evaluation of a maternal and child health programme in Nigeria                                              | 1                                                                | Article            | 2                           |
| 47  | Rift valley fever: diagnostic challenges and investment needs for vaccine development                                                                                                                    | 1                                                                | Article            | 4                           |
| 48  | The impact of country reimbursement programmes on living kidney donations                                                                                                                                | 1                                                                | Article            | 0                           |
| 49  | Allocating resources to support universal health coverage: policy processes and implementation in Malawi                                                                                                 | 1                                                                | Review             | 1                           |
| 50  | Using structural equation modelling to characterise multilevel socioecological predictors and mediators of condom use among transgender women and cisgender men who have sex with men in the Philippines | 1                                                                | Article            | 0                           |
| 51  | Combating hepatitis B and C by 2030: achievements, gaps, and options for actions in China                                                                                                                | 1                                                                | Article            | 5                           |
| 52  | Estimating the incidence of abortion: using the Abortion Incidence Complications Methodology in Ghana, 2017                                                                                              | 1                                                                | Article            | 4                           |
| 53  | The Global Health Security Index: what value does it add?                                                                                                                                                | 1                                                                | Editorial Material | 16                          |
| 54  | Towards universal health coverage: lessons from 10 years of healthcare reform in China                                                                                                                   | 1                                                                | Article            | 12                          |
| 55  | Infection and mortality of healthcare workers worldwide from COVID-19: a systematic review                                                                                                               | 0                                                                | Review             | 88                          |
| 56  | From words to actions: systematic review of interventions to promote sexual and reproductive health of persons with disabilities in low- and middle-income countries                                     | 1                                                                | Review             | 3                           |
| 57  | Early warning of epidemics: towards a national intelligent syndromic surveillance system (NISS) in China                                                                                                 | 1                                                                | Editorial Material | 7                           |
| 58  | Trends and inequalities in the nutritional status of adolescent girls and adult women in sub-Saharan Africa since 2000: a cross-sectional series study                                                   | 1                                                                | Article            | 4                           |
| 59  | Long-term outcomes for children with disability and severe acute malnutrition in Malawi                                                                                                                  | 1                                                                | Article            | 3                           |
| 60  | Health system governance in strengthening International Health Regulations (IHR) compliance in Myanmar                                                                                                   | 1                                                                | Article            | 2                           |
| 61  | Early estimates of COVID-19 infections in small, medium and large population clusters                                                                                                                    | 0                                                                | Article            | 4                           |
| 62  | Practical lessons for phone-based assessments of learning                                                                                                                                                | 1                                                                | Article            | 4                           |

| No. | Title                                                                                                                                                                                        | COVID-19-related publication = 0<br>non-COVID-19 publication = 1 | Document type      | Number of citations in 2021 |
|-----|----------------------------------------------------------------------------------------------------------------------------------------------------------------------------------------------|------------------------------------------------------------------|--------------------|-----------------------------|
| 63  | Diversification in causes of death in low-mortality countries: emerging patterns and implications                                                                                            | 1                                                                | Article            | 3                           |
| 64  | Nasa dugo('It's in the blood'): lay conceptions of hypertension in the Philippines                                                                                                           | 1                                                                | Article            | 2                           |
| 65  | National action to combat AMR: a One-Health approach to assess policy priorities in action plans                                                                                             | 1                                                                | Article            | 1                           |
| 66  | Rapid urban health security assessment tool: a new resource for evaluating local-level public health preparedness                                                                            | 1                                                                | Article            | 2                           |
| 67  | Income security during periods of ill health: a scoping review of policies, practice and coverage in low-income and middle-income countries                                                  | 1                                                                | Review             | 4                           |
| 68  | The sociopolitical context of the COVID-19 response in South Korea                                                                                                                           | 0                                                                | Editorial Material | 8                           |
| 69  | The implementation and effectiveness of the one stop centre model for intimate partner and sexual violence in low- and middle-income countries: a systematic review of barriers and enablers | 1                                                                | Review             | 2                           |
| 70  | Prioritising gender, equity, and human rights in a GRADE-based framework to inform future research on self care for sexual and reproductive health and rights                                | 1                                                                | Article            | 1                           |
| 71  | Improving the reporting of health research involving design: a proposed guideline                                                                                                            | 1                                                                | Editorial Material | 6                           |
| 72  | Does retraction after misconduct have an impact on citations? A pre-post study                                                                                                               | 1                                                                | Article            | 4                           |
| 73  | How health systems approached respiratory viral pandemics over time: a systematic review                                                                                                     | 1                                                                | Review             | 2                           |
| 74  | How do programmes to prevent intimate partner violence among the general population impact women with disabilities? Post-hoc analysis of three randomised controlled trials                  | 1                                                                | Article            | 1                           |
| 75  | Diagnostic accuracy of neonatal foot length to identify preterm and low birthweight infants: a systematic review and meta-analysis                                                           | 1                                                                | Review             | 0                           |
| 76  | Improving maternal, newborn and child health outcomes through a community-based women's health education program: a cluster randomised controlled trial in western Kenya                     | 1                                                                | Article            | 3                           |
| 77  | Global health education in UK medical schools: a review of undergraduate university curricula                                                                                                | 1                                                                | Review             | 1                           |

| No. | Title                                                                                                                                        | COVID-19-related publication = 0<br>non-COVID-19 publication = 1 | Document type      | Number of citations in 2021 |
|-----|----------------------------------------------------------------------------------------------------------------------------------------------|------------------------------------------------------------------|--------------------|-----------------------------|
| 78  | Adolescent sexual and reproductive health in sub-Saharan Africa: who is left behind?                                                         | 1                                                                | Article            | 17                          |
| 79  | Relation between opioid consumption and inclusion of opioids in 137 national essential medicines lists                                       | 1                                                                | Article            | 3                           |
| 80  | Proximate and socio-economic determinants of under-five mortality in Benin, 2017/2018                                                        | 1                                                                | Article            | 3                           |
| 81  | Estimating the yield of tuberculosis from key populations to inform targeted interventions in South Africa: a scoping review                 | 1                                                                | Review             | 0                           |
| 82  | Lessons learned from the development and implementation of an electronic paediatric emergency and acute care database in Lilongwe, Malawi    | 1                                                                | Article            | 1                           |
| 83  | The relatively young and rural population may limit the spread and severity of COVID-19 in Africa: a modelling study (vol 5, e002699, 2020)  | 0                                                                | Correction         | 0                           |
| 84  | Just-in-time postnatal education programmees to improve newborn care practices: needs and opportunities in low-resource settings             | 1                                                                | Article            | 0                           |
| 85  | How to design a complex behaviour change intervention: experiences from a nutrition-sensitive agriculture trial in rural India               | 1                                                                | Article            | 2                           |
| 86  | Estimating maternal mortality: what have we learned from 16 years of surveys in Afghanistan?                                                 | 1                                                                | Editorial Material | 2                           |
| 87  | Making sense of dictatorships and health outcomes                                                                                            | 1                                                                | Editorial Material | 3                           |
| 88  | Which men change in intimate partner violence prevention interventions? A trajectory analysis in Rwanda and South Africa                     | 1                                                                | Article            | 3                           |
| 89  | Seasonal variation in the non-specific effects of BCG vaccination on neonatal mortality: three randomised controlled trials in Guinea-Bissau | 1                                                                | Article            | 2                           |
| 90  | The role of health system context in the design and implementation of performance-based financing: evidence from Cote d'Ivoire               | 1                                                                | Article            | 1                           |



| No. | Title                                                                                                                                                                                     | COVID-19-related publication = 0<br>non-COVID-19 publication = 1 | Document type      | Number of citations in 2021 |
|-----|-------------------------------------------------------------------------------------------------------------------------------------------------------------------------------------------|------------------------------------------------------------------|--------------------|-----------------------------|
| 91  | Effectiveness, safety and acceptability of medical abortion at home versus in the clinic: a systematic review and meta-analysis in response to COVID-19                                   | 0                                                                | Review             | 10                          |
| 92  | Mortality surveillance and verbal autopsy strategies: experiences, challenges and lessons learnt in Papua New Guinea                                                                      | 1                                                                | Article            | 3                           |
| 93  | A systematic review of the burden of hypertension, access to services and patient views of hypertension in humanitarian crisis settings                                                   | 1                                                                | Review             | 2                           |
| 94  | Making sense of the evidence in population health intervention research: building a dry stone wall                                                                                        | 1                                                                | Article            | 7                           |
| 95  | Trust, culture and communication: determinants of eye health and care among Indigenous people with diabetes in Australia                                                                  | 1                                                                | Article            | 8                           |
| 96  | The role of gender inclusive leadership during the COVID-19 pandemic to support vulnerable populations in conflict settings                                                               | 0                                                                | Editorial Material | 4                           |
| 97  | Article processing charges are stalling the progress of African researchers: a call for urgent reforms                                                                                    | 1                                                                | Editorial Material | 7                           |
| 98  | Effect of home-based newborn care on neonatal and infant mortality: a cluster randomised trial in India                                                                                   | 1                                                                | Article            | 2                           |
| 99  | Implementation of health and health-related sustainable development goals: progress, challenges and opportunities - a systematic literature review                                        | 1                                                                | Review             | 3                           |
| 100 | COVID-19 stressors on migrant workers in Kuwait: cumulative risk considerations                                                                                                           | 0                                                                | Article            | 19                          |
| 101 | Large-scale public venues as medical emergency sites in disasters: lessons from COVID-19 and the use of Fangcang shelter hospitals in Wuhan, China                                        | 0                                                                | Review             | 20                          |
| 102 | Community-based interventions for detection and management of diabetes and hypertension in underserved communities: a mixed-methods evaluation in Brazil, India, South Africa and the USA | 1                                                                | Article            | 8                           |
| 103 | The magnitude and determinants of violence against healthcare workers in Pakistan                                                                                                         | 1                                                                | Article            | 4                           |
| 104 | Continued nursing education in low-income and middle-income countries: a narrative synthesis                                                                                              | 1                                                                | Article            | 3                           |

| No. | Title                                                                                                                                                                                                | COVID-19-related publication = 0<br>non-COVID-19 publication = 1 | Document type      | Number of citations in 2021 |
|-----|------------------------------------------------------------------------------------------------------------------------------------------------------------------------------------------------------|------------------------------------------------------------------|--------------------|-----------------------------|
| 105 | Rural-urban health-seeking behaviours for non-communicable diseases in Sierra Leone                                                                                                                  | 1                                                                | Article            | 8                           |
| 106 | Estimating uncertainty in geospatial modelling at multiple spatial resolutions: the pattern of delivery via caesarean section in Tanzania                                                            | 1                                                                | Article            | 1                           |
| 107 | Enhancing the use of stakeholder analysis for policy implementation research: towards a novel framing and operationalised measures                                                                   | 1                                                                | Article            | 3                           |
| 108 | The socioeconomic dynamics of trends in female genital mutilation/cutting across Africa                                                                                                              | 1                                                                | Article            | 1                           |
| 109 | Understanding and comparing HIV-related law and policy environments: cross-national data and accountability for the global AIDS response                                                             | 1                                                                | Article            | 2                           |
| 110 | Gender-transformative programming with men and boys to improve sexual and reproductive health and rights: a systematic review of intervention studies                                                | 1                                                                | Review             | 9                           |
| 111 | Stringent containment measures without complete city lockdown to achieve low incidence and mortality across two waves of COVID-19 in Hong Kong                                                       | 0                                                                | Article            | 10                          |
| 112 | BCG skin reactions by 2 months of age are associated with better survival in infancy: a prospective observational study from Guinea-Bissau                                                           | 1                                                                | Article            | 9                           |
| 113 | Safety decision-making and planning mobile app for intimate partner violence prevention and response: randomised controlled trial in Kenya                                                           | 1                                                                | Article            | 1                           |
| 114 | Europe should lead in coordinated procurement of quality-assured medicines for programmes in low-income and middle-income countries                                                                  | 1                                                                | Editorial Material | 2                           |
| 115 | Intended and unintended effects: community perspectives on a performance-based financing programme in Malawi                                                                                         | 1                                                                | Article            | 2                           |
| 116 | Building HIV healthcare worker capacity through telehealth in Vietnam                                                                                                                                | 1                                                                | Article            | 3                           |
| 117 | Effects of improved complementary feeding and improved water, sanitation and hygiene on early child development among HIV-exposed children: substudy of a cluster randomised trial in rural Zimbabwe | 1                                                                | Article            | 6                           |

| No. | Title                                                                                                                           | COVID-19-related publication = 0<br>non-COVID-19 publication = 1 | Document type      | Number of citations in 2021 |
|-----|---------------------------------------------------------------------------------------------------------------------------------|------------------------------------------------------------------|--------------------|-----------------------------|
| 118 | Quality assurance systems of pharmaceutical distributors in low-income and middle-income countries: weaknesses and ways forward | 1                                                                | Article            | 2                           |
| 119 | Whole-genome sequencing as part of national and international surveillance programmes for antimicrobial resistance: a roadmap   | 1                                                                | Article            | 12                          |
| 120 | Impact of financial management centralisation in a health system under austerity: a qualitative study from South Africa         | 1                                                                | Article            | 1                           |
| 121 | Willingness to comply with physical distancing measures against COVID-19 in four African countries                              | 0                                                                | Editorial Material | 3                           |
| 122 | A vulnerability index for COVID-19: spatial analysis at the subnational level in Kenya                                          | 0                                                                | Article            | 15                          |
| 123 | A checklist to improve health system resilience to infectious disease outbreaks and natural hazards                             | 1                                                                | Article            | 2                           |
| 124 | An analysis of clinical predictive values for radiographic pneumonia in children                                                | 1                                                                | Article            | 3                           |
| 125 | Mass azithromycin administration: considerations in an increasingly resistant world                                             | 1                                                                | Editorial Material | 5                           |
| 126 | A rapid risk analysis tool to prioritise response to infectious disease outbreaks                                               | 1                                                                | Article            | 1                           |
| 127 | Governance of the Covid-19 response: a call for more inclusive and transparent decision-making                                  | 0                                                                | Editorial Material | 43                          |
| 128 | Delivering water, sanitation and hygiene interventions to women and children in conflict settings: a systematic review          | 1                                                                | Review             | 4                           |
| 129 | The potential health and revenue effects of a tax on sugar sweetened beverages in Zambia                                        | 1                                                                | Article            | 3                           |
| 130 | How to close the maternal and neonatal sepsis gap in sub-Saharan Africa                                                         | 1                                                                | Editorial Material | 1                           |
| 131 | Pandemicity, COVID-19 and the limits of public health 'science'                                                                 | 0                                                                | Editorial Material | 5                           |
| 132 | Paradigms, policies and people: the future of primary health care                                                               | 1                                                                | Editorial Material | 2                           |
| 133 | Virginity testing: recommendations for primary care physicians in Europe and North America                                      | 1                                                                | Article            | 2                           |
| 134 | The empirical evidence underpinning the concept and practice of person-centred care for serious illness: a systematic review    | 1                                                                | Review             | 4                           |
| 135 | Fighting non-communicable diseases in East Africa: assessing progress and identifying the next steps                            | 1                                                                | Article            | 2                           |

| No. | Title                                                                                                                                                                                                        | COVID-19-related publication = 0<br>non-COVID-19 publication = 1 | Document type      | Number of citations in 2021 |
|-----|--------------------------------------------------------------------------------------------------------------------------------------------------------------------------------------------------------------|------------------------------------------------------------------|--------------------|-----------------------------|
| 136 | India's syndemic of tuberculosis and COVID-19                                                                                                                                                                | 0                                                                | Editorial Material | 15                          |
| 137 | Village-level climate and weather variability, mediated by village-level crop yield, is associated with linear growth in children in Uganda                                                                  | 1                                                                | Article            | 1                           |
| 138 | Psychiatric care use among migrants to Sweden compared with Swedish-born residents: a longitudinal cohort study of 5 150 753 people                                                                          | 1                                                                | Article            | 5                           |
| 139 | Implementation of the new WHO antenatal care model for a positive pregnancy experience: a monitoring framework                                                                                               | 1                                                                | Article            | 7                           |
| 140 | Lessons from developing, implementing and sustaining a participatory partnership for children's surgical care in Tanzania                                                                                    | 1                                                                | Article            | 1                           |
| 141 | International migration and health: it is time to go beyond conventional theoretical frameworks                                                                                                              | 1                                                                | Article            | 8                           |
| 142 | Pregnancy cohorts and biobanking in sub-Saharan Africa: a systematic review                                                                                                                                  | 1                                                                | Review             | 1                           |
| 143 | Leapfrogging laboratories: the promise and pitfalls of high-tech solutions for antimicrobial resistance surveillance in low-income settings                                                                  | 1                                                                | Article            | 7                           |
| 144 | Towards inclusionary and diversity-sensitive public health: the consequences of exclusionary othering in public health using the example of COVID-19 management in German reception centres and asylum camps | 0                                                                | Article            | 3                           |
| 145 | Boys are more likely to be undernourished than girls: a systematic review and meta-analysis of sex differences in undernutrition                                                                             | 1                                                                | Review             | 17                          |
| 146 | Thinking differently: lessons learned by international public health specialists while supporting the Integrated Disease Surveillance and Response system in Pakistan                                        | 1                                                                | Article            | 0                           |
| 147 | Systematic review of frameworks used to conceptualise health pathways of individuals diagnosed with cardiovascular diseases                                                                                  | 1                                                                | Review             | 0                           |
| 148 | Global strategies and local implementation of health and health-related SDGs: lessons from consultation in countries across five regions                                                                     | 1                                                                | Article            | 3                           |

| No. | Title                                                                                                                                                                                 | COVID-19-related publication = 0<br>non-COVID-19 publication = 1 | Document type      | Number of citations in 2021 |
|-----|---------------------------------------------------------------------------------------------------------------------------------------------------------------------------------------|------------------------------------------------------------------|--------------------|-----------------------------|
| 149 | Health system governance: a triangle of rules                                                                                                                                         | 1                                                                | Editorial Material | 3                           |
| 150 | Community engagement in outbreak response: lessons from the 2014-2016 Ebola outbreak in Sierra Leone                                                                                  | 1                                                                | Review             | 9                           |
| 151 | Health systems governance: the missing links                                                                                                                                          | 1                                                                | Editorial Material | 8                           |
| 152 | Epidemiology of multimorbidity in conditions of extreme poverty: a population-based study of older adults in rural Burkina Faso (vol 5, e002096, 2020)                                | 1                                                                | Correction         | 0                           |
| 153 | Barriers and facilitators influencing facility-based childbirth in rural Haiti: a mixed method study with a convergent design                                                         | 1                                                                | Article            | 3                           |
| 154 | Quantifying the cost of in-kind contributions to a multidonor-funded health research capacity-building programme: the case of the Consortium for Advanced Research Training in Africa | 1                                                                | Article            | 1                           |
| 155 | The frequency and clinical presentation of Zika virus coinfections: a systematic review                                                                                               | 1                                                                | Review             | 4                           |
| 156 | Longitudinal path analysis of depressive symptoms and functioning among women of child-rearing age in postconflict Timor-Leste                                                        | 1                                                                | Article            | 0                           |
| 157 | Are low and middle-income countries prioritising high-value healthcare interventions?                                                                                                 | 1                                                                | Article            | 2                           |
| 158 | Labour companionship and women's experiences of mistreatment during childbirth: results from a multi-country community-based survey                                                   | 1                                                                | Article            | 3                           |
| 159 | Ten years of progress towards universal health coverage: has China achieved equitable healthcare financing?                                                                           | 1                                                                | Article            | 1                           |
| 160 | How many human pathogens are there in Laos? An estimate of national human pathogen diversity and analysis of historical trends                                                        | 1                                                                | Article            | 1                           |
| 161 | Health system resilience in managing the COVID-19 pandemic: lessons from Singapore                                                                                                    | 0                                                                | Article            | 19                          |
| 162 | Bridging Western and Indigenous knowledge through intercultural dialogue: lessons from participatory research in Mexico                                                               | 1                                                                | Article            | 5                           |

| No. | Title                                                                                                                                                                        | COVID-19-related publication = 0<br>non-COVID-19 publication = 1 | Document type      | Number of citations in 2021 |
|-----|------------------------------------------------------------------------------------------------------------------------------------------------------------------------------|------------------------------------------------------------------|--------------------|-----------------------------|
| 163 | The civil registration system is a potentially viable data source for reliable subnational mortality measurement in India                                                    | 1                                                                | Article            | 5                           |
| 164 | Level of confidence in and endorsement of the health system among internet users in 12 low-income and middle-income countries                                                | 1                                                                | Article            | 4                           |
| 165 | Practical metrics for establishing the health benefits of research to support research prioritisation                                                                        | 1                                                                | Article            | 2                           |
| 166 | An analysis of International Health Regulations Emergency Committees and Public Health Emergency of International Concern Designations                                       | 1                                                                | Article            | 23                          |
| 167 | Missing men with tuberculosis: the need to address structural influences and implement targeted and multidimensional interventions                                           | 1                                                                | Article            | 10                          |
| 168 | Long-term change in the prevalence of intimate partner violence: a 20-year follow-up study in Leon, Nicaragua, 1995-2016                                                     | 1                                                                | Article            | 3                           |
| 169 | The CURE Protocol: evaluation and external validation of a new public health strategy for treating paediatric hydrocephalus in low-resource settings                         | 1                                                                | Article            | 1                           |
| 170 | Thinking beyond implementation: context and culture in global mental health                                                                                                  | 1                                                                | Editorial Material | 1                           |
| 171 | Differential yield of universal versus selective drug susceptibility testing of patients with tuberculosis in high-burden countries: a systematic review and meta-analysis   | 1                                                                | Review             | 1                           |
| 172 | Effects of food policy actions on Indigenous Peoples' nutrition-related outcomes: a systematic review                                                                        | 1                                                                | Review             | 3                           |
| 173 | The impact of a health facility construction campaign on health service utilisation and outcomes: analysis of spatially linked survey and facility location data in Ethiopia | 1                                                                | Article            | 0                           |
| 174 | COVID-19: transformative actions for more equitable, resilient, sustainable societies and health systems in the Americas                                                     | 0                                                                | Editorial Material | 6                           |
| 175 | Global health and human rights for a postpandemic world                                                                                                                      | 1                                                                | Editorial Material | 0                           |
| 176 | Fostering global primary care research: a capacity-building approach                                                                                                         | 1                                                                | Article            | 4                           |

| No. | Title                                                                                                                                                                                                                                 | COVID-19-related publication = 0<br>non-COVID-19 publication = 1 | Document type      | Number of citations in 2021 |
|-----|---------------------------------------------------------------------------------------------------------------------------------------------------------------------------------------------------------------------------------------|------------------------------------------------------------------|--------------------|-----------------------------|
| 177 | Understanding efficiency and the effect of pay-for-performance across health facilities in Tanzania                                                                                                                                   | 1                                                                | Article            | 2                           |
| 178 | Addressing power imbalances in global health: Pre-Publication Support Services (PREPSS) for authors in low-income and middle-income countries                                                                                         | 1                                                                | Article            | 6                           |
| 179 | Psychological resilience, fragility and the health workforce: lessons on pandemic preparedness from Liberia and Sierra Leone                                                                                                          | 1                                                                | Editorial Material | 1                           |
| 180 | Building back from the ground up: the vital role of communities                                                                                                                                                                       | 1                                                                | Editorial Material | 2                           |
| 181 | Advances and challenges on the path toward the SDGs: subnational inequalities in Mexico, 1990-2017                                                                                                                                    | 1                                                                | Article            | 1                           |
| 182 | The impact of implementing the 2016 WHO Recommendations on Antenatal Care for a Positive Pregnancy Experience on perinatal deaths: an interrupted time-series analysis in Mpumalanga province, South Africa                           | 1                                                                | Article            | 2                           |
| 183 | For malaria elimination India needs a platform for data integration                                                                                                                                                                   | 1                                                                | Editorial Material | 7                           |
| 184 | The impact of physician migration on mortality in low and middle-income countries: an economic modelling study                                                                                                                        | 1                                                                | Article            | 7                           |
| 185 | Reduction in healthcare services during the COVID-19 pandemic in China                                                                                                                                                                | 0                                                                | Article            | 15                          |
| 186 | What will it take to implement health and health-related sustainable development goals?                                                                                                                                               | 1                                                                | Editorial Material | 3                           |
| 187 | Towards health market systems changes for migrant workers based on the COVID-19 experience in Singapore                                                                                                                               | 0                                                                | Editorial Material | 5                           |
| 188 | Institutionalising global health: a call for ethical reflection                                                                                                                                                                       | 1                                                                | Article            | 4                           |
| 189 | Impact of the societal response to COVID-19 on access to healthcare for non-COVID-19 health issues in slum communities of Bangladesh, Kenya, Nigeria and Pakistan: results of pre-COVID and COVID-19 lockdown stakeholder engagements | 0                                                                | Article            | 56                          |
| 190 | Medicine is a social science: COVID-19 and the tragedy of residential care facilities in high-income countries                                                                                                                        | 0                                                                | Editorial Material | 3                           |
| 191 | The International Diet-Health Index: a novel tool to evaluate diet quality for cardiometabolic health across countries                                                                                                                | 1                                                                | Article            | 1                           |
| 192 | The cost of maternal health services in low-income and middle-income countries from a provider's perspective: a                                                                                                                       | 1                                                                | Review             | 0                           |

| No. | Title                                                                                                                                                                                                                                 | COVID-19-related publication = 0<br>non-COVID-19 publication = 1 | Document type      | Number of citations in 2021 |
|-----|---------------------------------------------------------------------------------------------------------------------------------------------------------------------------------------------------------------------------------------|------------------------------------------------------------------|--------------------|-----------------------------|
|     | systematic review                                                                                                                                                                                                                     |                                                                  |                    |                             |
| 193 | Shifting the paradigm: using disease outbreaks to build resilient health systems                                                                                                                                                      | 1                                                                | Editorial Material | 4                           |
| 194 | Reduction of secondary transmission of SARS-CoV-2 in households by face mask use, disinfection and social distancing: a cohort study in Beijing, China                                                                                | 0                                                                | Article            | 135                         |
| 195 | Cuba y seguridad sanitaria mundial: Cuba's role in global health security                                                                                                                                                             | 1                                                                | Article            | 1                           |
| 196 | Evaluating the declarations of open defecation free status under the Swachh Bharat ('Clean India') Mission: repeated cross-sectional surveys in Rajasthan, India                                                                      | 1                                                                | Article            | 3                           |
| 197 | The impacts of combined social and economic empowerment training on intimate partner violence, depression, gender norms and livelihoods among women: an individually randomised controlled trial and qualitative study in Afghanistan | 1                                                                | Article            | 3                           |
| 198 | Modelling interventions to control COVID-19 outbreaks in a refugee camp                                                                                                                                                               | 0                                                                | Article            | 6                           |
| 199 | Setting the standard: multidisciplinary hallmarks for structural, equitable and tracked antibiotic policy                                                                                                                             | 1                                                                | Review             | 12                          |
| 200 | The relationship between social risk factors and latent tuberculosis infection among individuals residing in England: a cross-sectional study                                                                                         | 1                                                                | Article            | 0                           |
| 201 | What COVID-19 may teach us about interdisciplinarity                                                                                                                                                                                  | 0                                                                | Editorial Material | 4                           |
| 202 | Intimate partner violence, contextual factors and under-5 mortality: a multilevel analysis of cross-sectional surveys from 20 Sub-Saharan African countries                                                                           | 1                                                                | Article            | 0                           |
| 203 | The cost-effectiveness of using performance-based financing to deliver the basic package of health services in Afghanistan                                                                                                            | 1                                                                | Article            | 2                           |
| 204 | Panacea or pitfall? The introduction of community health extension workers in Uganda                                                                                                                                                  | 1                                                                | Editorial Material | 2                           |
| 205 | Universal masking for COVID-19: evidence, ethics and recommendations                                                                                                                                                                  | 0                                                                | Editorial Material | 10                          |
| 206 | The relatively young and rural population may limit the spread and severity of COVID-19 in Africa: a modelling study                                                                                                                  | 0                                                                | Article            | 49                          |



| No. | Title                                                                                                                                                                    | COVID-19-related publication = 0<br>non-COVID-19 publication = 1 | Document type      | Number of citations in 2021 |
|-----|--------------------------------------------------------------------------------------------------------------------------------------------------------------------------|------------------------------------------------------------------|--------------------|-----------------------------|
| 207 | Antimicrobial resistance in the Pacific Island countries and territories                                                                                                 | 1                                                                | Article            | 5                           |
| 208 | Delivering infectious disease interventions to women and children in conflict settings: a systematic review                                                              | 1                                                                | Review             | 2                           |
| 209 | Staying afloat: community perspectives on health system resilience in the management of pregnancy and childbirth care during floods in Cambodia                          | 1                                                                | Article            | 5                           |
| 210 | The impact of scaling up cervical cancer screening and treatment services among women living with HIV in Kenya: a modelling study                                        | 1                                                                | Article            | 1                           |
| 211 | Modelling the COVID-19 pandemic in context: an international participatory approach                                                                                      | 0                                                                | Article            | 8                           |
| 212 | Inequities in the incidence and safety of abortion in Nigeria                                                                                                            | 1                                                                | Article            | 10                          |
| 213 | Analysis of clinical knowledge, absenteeism and availability of resources for maternal and child health: a cross-sectional quality of care study in 10 African countries | 1                                                                | Article            | 3                           |
| 214 | Lockdown measures in response to COVID-19 in nine sub-Saharan African countries                                                                                          | 0                                                                | Article            | 46                          |
| 215 | The compatibility of reductionistic and complexity approaches in a sociomedical innovation perspective                                                                   | 1                                                                | Article            | 2                           |
| 216 | Search without rescue? Evaluating the international search and rescue response to earthquake disasters                                                                   | 1                                                                | Article            | 2                           |
| 217 | Population health, economics and ethics in the age of COVID-19                                                                                                           | 0                                                                | Article            | 2                           |
| 218 | Ethical issues in intervention studies on the prevention and management of diabetes and hypertension in sub-Saharan Africa                                               | 1                                                                | Editorial Material | 3                           |
| 219 | Incidence of treatment for postabortion complications in India, 2015                                                                                                     | 1                                                                | Article            | 0                           |
| 220 | The cost-effectiveness of using results-based financing to reduce maternal and perinatal mortality in Malawi                                                             | 1                                                                | Article            | 2                           |
| 221 | Legal preparedness as part of COVID-19 response: the first 100 days in Taiwan                                                                                            | 0                                                                | Editorial Material | 3                           |
| 222 | Mobile applications addressing violence against women: a systematic review                                                                                               | 1                                                                | Review             | 9                           |
| 223 | Making sense of emerging evidence on the non-specific effects of the BCG vaccine on malaria risk and neonatal                                                            | 1                                                                | Editorial Material | 3                           |

| No. | Title                                                                                                                                            | COVID-19-related publication = 0<br>non-COVID-19 publication = 1 | Document type      | Number of citations in 2021 |
|-----|--------------------------------------------------------------------------------------------------------------------------------------------------|------------------------------------------------------------------|--------------------|-----------------------------|
|     | mortality                                                                                                                                        |                                                                  |                    |                             |
| 224 | Mental health conditions after snakebite: a scoping review                                                                                       | 1                                                                | Review             | 3                           |
| 225 | Towards the real-time inclusion of sex- and age-disaggregated data in pandemic responses                                                         | 1                                                                | Editorial Material | 8                           |
| 226 | Factors influencing inappropriate use of antibiotics in outpatient and community settings in China: a mixed-methods systematic review            | 1                                                                | Review             | 8                           |
| 227 | Tailored support for national NCD policy and programme implementation: an over-looked priority                                                   | 1                                                                | Review             | 1                           |
| 228 | Health system governance: welcoming the reboot                                                                                                   | 1                                                                | Editorial Material | 5                           |
| 229 | Patient pathways of tuberculosis care-seeking and treatment: an individual-level analysis of National Health Insurance data in Taiwan            | 1                                                                | Article            | 3                           |
| 230 | Income security in times of ill health: the next frontier for the SDGs                                                                           | 1                                                                | Editorial Material | 4                           |
| 231 | Global health beyond geographical boundaries: reflections from global health education                                                           | 1                                                                | Editorial Material | 7                           |
| 232 | Time-critical conditions: assessment of burden and access to care using verbal autopsy in Agincourt, South Africa                                | 1                                                                | Article            | 6                           |
| 233 | Delivering non-communicable disease interventions to women and children in conflict settings: a systematic review                                | 1                                                                | Review             | 4                           |
| 234 | Delivering mental health and psychosocial support interventions to women and children in conflict settings: a systematic review                  | 1                                                                | Review             | 7                           |
| 235 | The differential impact of economic recessions on health systems in middle-income settings: a comparative case study of unequal states in Brazil | 1                                                                | Article            | 1                           |
| 236 | Surgathon: a new model for creating a surgical innovation ecosystem in low-resource settings                                                     | 1                                                                | Article            | 1                           |
| 237 | Lessons from a multidisciplinary partnership involving women parliamentarians to address the overuse of caesarean section in Italy               | 1                                                                | Article            | 3                           |
| 238 | Development of measures for assessing mistreatment of women during facility-based childbirth based on labour                                     | 1                                                                | Article            | 0                           |

| No. | Title                                                                                                                                                                                              | COVID-19-related publication = 0<br>non-COVID-19 publication = 1 | Document type      | Number of citations in 2021 |
|-----|----------------------------------------------------------------------------------------------------------------------------------------------------------------------------------------------------|------------------------------------------------------------------|--------------------|-----------------------------|
|     | observations                                                                                                                                                                                       |                                                                  |                    |                             |
| 239 | The role of HIV viral load in mathematical models of HIV transmission and treatment: a review                                                                                                      | 1                                                                | Review             | 1                           |
| 240 | Use of interrupted time series methods in the evaluation of health system quality improvement interventions: a methodological systematic review                                                    | 1                                                                | Review             | 14                          |
| 241 | Shortages and price variability of essential cytotoxic medicines for treating children with cancers                                                                                                | 1                                                                | Article            | 1                           |
| 242 | SMART Vaccines 2.0 decision-support platform: a tool to facilitate and promote priority setting for sustainable vaccination in resource-limited settings                                           | 1                                                                | Article            | 2                           |
| 243 | Gestational weight gain in low-income and middle-income countries: a modelling analysis using nationally representative data                                                                       | 1                                                                | Article            | 6                           |
| 244 | Population impact and effectiveness of sequential 13-valent pneumococcal conjugate and monovalent rotavirus vaccine introduction on infant mortality: prospective birth cohort studies from Malawi | 1                                                                | Article            | 1                           |
| 245 | Evaluating performance-based financing in low-income and middle-income countries: the need to look beyond average effect                                                                           | 1                                                                | Editorial Material | 2                           |
| 246 | Facilities are substantially more influential than care providers in the quality of delivery care received: a variance decomposition and clustering analysis in Kenya, Malawi and India            | 1                                                                | Article            | 0                           |
| 247 | How (not) to write about global health                                                                                                                                                             | 1                                                                | Editorial Material | 12                          |
| 248 | COVID-19 travel restrictions and the International Health Regulations (2005)                                                                                                                       | 0                                                                | Editorial Material | 8                           |
| 249 | Market-driven, value-based, advance commitment (MVAC): accelerating the development of a pathbreaking universal drug regimen to end TB                                                             | 1                                                                | Editorial Material | 0                           |
| 250 | How men who have sex with men experience HIV health services in Kampala, Uganda                                                                                                                    | 1                                                                | Article            | 5                           |
| 251 | Justice: a key consideration in health policy and systems research ethics                                                                                                                          | 1                                                                | Article            | 4                           |

| No. | Title                                                                                                                                        | COVID-19-related publication = 0<br>non-COVID-19 publication = 1 | Document type      | Number of citations in 2021 |
|-----|----------------------------------------------------------------------------------------------------------------------------------------------|------------------------------------------------------------------|--------------------|-----------------------------|
| 252 | External funding to strengthen capacity for research in low-income and middle-income countries: exigence, excellence and equity              | 1                                                                | Editorial Material | 3                           |
| 253 | Toward improving respectful maternity care: a discrete choice experiment with rural women in northeast Nigeria                               | 1                                                                | Article            | 2                           |
| 254 | Closing the inequality gaps in reproductive, maternal, newborn and child health coverage: slow and fast progressors                          | 1                                                                | Article            | 5                           |
| 255 | Managing outbreaks of highly contagious diseases in prisons: a systematic review                                                             | 1                                                                | Review             | 12                          |
| 256 | Field sales force model to increase adoption of a novel tuberculosis diagnostic test among private providers: evidence from India            | 1                                                                | Article            | 0                           |
| 257 | Women's report of mistreatment during facility-based childbirth: validity and reliability of community survey measures                       | 1                                                                | Article            | 0                           |
| 258 | Health and human rights are inextricably linked in the COVID-19 response                                                                     | 0                                                                | Article            | 13                          |
| 259 | Barriers to maternal health services during the Ebola outbreak in three West African countries: a literature review                          | 1                                                                | Review             | 7                           |
| 260 | Decolonising Global (Public) Health: from Western universalism to Global pluriversalities                                                    | 1                                                                | Editorial Material | 21                          |
| 261 | Time trends and determinants of breastfeeding practices among adolescents and young women in Nigeria, 2003-2018                              | 1                                                                | Article            | 5                           |
| 262 | The contribution of grandmother involvement to child growth and development: an observational study in rural Pakistan                        | 1                                                                | Article            | 5                           |
| 263 | Patient-centric research in the time of COVID-19: conducting ethical COVID-19 research in Africa                                             | 0                                                                | Editorial Material | 1                           |
| 264 | Income security during public health emergencies: the COVID-19 poverty trap in Vietnam                                                       | 0                                                                | Editorial Material | 10                          |
| 265 | Modelling the cost-effectiveness of introducing subsidised malaria rapid diagnostic tests in the private retail sector in sub-Saharan Africa | 1                                                                | Article            | 1                           |
| 266 | Facial protection for healthcare workers during pandemics: a scoping review                                                                  | 1                                                                | Review             | 37                          |
| 267 | YouTube as a source of information on COVID-19: a pandemic of misinformation?                                                                | 0                                                                | Article            | 98                          |
| 268 | Revolving doors and conflicts of interest in health regulatory agencies in Brazil                                                            | 1                                                                | Editorial Material | 1                           |

| No. | Title                                                                                                                                             | COVID-19-related publication = 0<br>non-COVID-19 publication = 1 | Document type      | Number of citations in 2021 |
|-----|---------------------------------------------------------------------------------------------------------------------------------------------------|------------------------------------------------------------------|--------------------|-----------------------------|
| 269 | Addressing inequities in the global burden of maternal undernutrition: the role of targeting                                                      | 1                                                                | Editorial Material | 8                           |
| 270 | Behavioural insights to support increased consumption of quality protein maize by young children: a cluster randomised trial in Ethiopia          | 1                                                                | Article            | 1                           |
| 271 | Systems thinking for health emergencies: use of process mapping during outbreak response                                                          | 1                                                                | Article            | 0                           |
| 272 | Aligning diagnostics to the point-of-care: lessons for innovators, evaluators and decision-makers from tuberculosis and HIV                       | 1                                                                | Article            | 1                           |
| 273 | 'Dark matter', second waves and epidemiological modelling                                                                                         | 1                                                                | Article            | 2                           |
| 274 | Assessing the efficiency of countries in making progress towards universal health coverage: a data envelopment analysis of 172 countries          | 1                                                                | Article            | 7                           |
| 275 | Assessing the value of human papillomavirus vaccination in Gavi-eligible low-income and middle-income countries                                   | 1                                                                | Article            | 2                           |
| 276 | The value proposition of the Global Health Security Index                                                                                         | 1                                                                | Article            | 10                          |
| 277 | Malaria vector control in sub-Saharan Africa in the time of COVID-19: no room for complacency                                                     | 0                                                                | Editorial Material | 2                           |
| 278 | Intersectoral policy on industries that produce unhealthy commodities: governing in a new era of the global economy?                              | 1                                                                | Article            | 5                           |
| 279 | WHO recommendations on antenatal nutrition: an update on multiple micronutrient supplements                                                       | 1                                                                | Editorial Material | 0                           |
| 280 | Modelling the pandemic: attuning models to their contexts                                                                                         | 1                                                                | Article            | 14                          |
| 281 | How to prevent and address safeguarding concerns in global health research programmes: practice, process and positionality in marginalised spaces | 1                                                                | Review             | 2                           |
| 282 | COVID-19: the rude awakening for the political elite in low- and middle-income countries                                                          | 0                                                                | Editorial Material | 4                           |
| 283 | Why global health can offer more on gender                                                                                                        | 1                                                                | Editorial Material | 0                           |
| 284 | The influence of distance and quality on utilisation of birthing services at health facilities in Eastern Region, Ghana                           | 1                                                                | Article            | 10                          |
| 285 | The distance-quality trade-off in women's choice of family planning provider in North Eastern Tanzania                                            | 1                                                                | Article            | 5                           |

| No. | Title                                                                                                                                                                                | COVID-19-related publication = 0<br>non-COVID-19 publication = 1 | Document type      | Number of citations in 2021 |
|-----|--------------------------------------------------------------------------------------------------------------------------------------------------------------------------------------|------------------------------------------------------------------|--------------------|-----------------------------|
| 286 | The impacts of corporatisation of healthcare on medical practice and professionals in Maharashtra, India                                                                             | 1                                                                | Article            | 1                           |
| 287 | Associations of women's empowerment with neonatal, infant and under-5 mortality in low- and /middle-income countries: meta-analysis of individual participant data from 59 countries | 1                                                                | Article            | 8                           |
| 288 | Impact of school-based malaria case management on school attendance, health and education outcomes: a cluster randomised trial in southern Malawi                                    | 1                                                                | Article            | 1                           |
| 289 | Integrated digital system for community engagement and community-based surveillance during the 2014-2016 Ebola outbreak in Sierra Leone: lessons for future health emergencies       | 1                                                                | Article            | 1                           |
| 290 | Incentivising wealthy nations to participate in the COVID-19 Vaccine Global Access Facility (COVAX): a game theory perspective                                                       | 0                                                                | Editorial Material | 14                          |
| 291 | Finding the missing millions: lessons from 10 active case finding interventions in high tuberculosis burden countries                                                                | 1                                                                | Editorial Material | 4                           |
| 292 | Towards better targeting: lessons from a posthoneymoon measles outbreak in Madagascar, 2018-2019                                                                                     | 1                                                                | Editorial Material | 0                           |
| 293 | How the internet increases modern contraception uptake: evidence from eight sub-Saharan African countries                                                                            | 1                                                                | Article            | 0                           |
| 294 | Does economic growth reduce childhood stunting? A multicountry analysis of 89 Demographic and Health Surveys in sub-Saharan Africa                                                   | 1                                                                | Article            | 2                           |
| 295 | Decolonising global health: if not now, when?                                                                                                                                        | 1                                                                | Editorial Material | 44                          |
| 296 | Impact of a free care policy on the utilisation of health services during an Ebola outbreak in the Democratic Republic of Congo: an interrupted time-series analysis                 | 1                                                                | Article            | 4                           |
| 297 | Linking coping strategies to locally-perceived aetiologies of mental distress in northern Rwanda                                                                                     | 1                                                                | Article            | 3                           |
| 298 | Searching for accountability: can the WHO global action plan for refugees and migrants deliver?                                                                                      | 1                                                                | Editorial Material | 1                           |
| 299 | Towards a socially just model: balancing hunger and response to the COVID-19 pandemic in Bangladesh                                                                                  | 0                                                                | Editorial Material | 6                           |
| 300 | Innovative financing to fund surgical systems and expand surgical care in low-income and middle-income countries                                                                     | 1                                                                | Article            | 5                           |

| No. | Title                                                                                                                                                                                     | COVID-19-related publication = 0<br>non-COVID-19 publication = 1 | Document type      | Number of citations in 2021 |
|-----|-------------------------------------------------------------------------------------------------------------------------------------------------------------------------------------------|------------------------------------------------------------------|--------------------|-----------------------------|
| 301 | Regulating international clinical research: an ethical framework for policy-makers                                                                                                        | 1                                                                | Article            | 3                           |
| 302 | The impact of COVID-19 on HIV financing in Nigeria: a call for proactive measures                                                                                                         | 0                                                                | Editorial Material | 7                           |
| 303 | Inequalities in early childhood care and development in low/middle-income countries: 2010-2018                                                                                            | 1                                                                | Article            | 31                          |
| 304 | The predictive power of health system environments: a novel approach for explaining inequalities in access to maternal healthcare                                                         | 1                                                                | Article            | 1                           |
| 305 | Validation analysis of Global Health Security Index (GHSI) scores 2019                                                                                                                    | 1                                                                | Article            | 8                           |
| 306 | Surgical site infection after gastrointestinal surgery in children: an international, multicentre, prospective cohort study                                                               | 1                                                                | Article            | 1                           |
| 307 | District-level health system strengthening for universal health coverage: evidence from a longitudinal cohort study in rural Madagascar, 2014-2018                                        | 1                                                                | Article            | 1                           |
| 308 | Engaging culture and context in mhGAP implementation: fostering reflexive deliberation in practice                                                                                        | 1                                                                | Article            | 2                           |
| 309 | 'I do what a woman should do': a grounded theory study of women's menstrual experiences at work in Mukono District, Uganda                                                                | 1                                                                | Article            | 6                           |
| 310 | Empiricism in non-communicable disease mortality measurement for the Asia-Pacific: lost in translation                                                                                    | 1                                                                | Article            | 2                           |
| 311 | Cost-effectiveness analysis of tranexamic acid for the treatment of traumatic brain injury, based on the results of the CRASH-3 randomised trial: a decision modelling approach           | 1                                                                | Article            | 5                           |
| 312 | The WHO Global Benchmarking Tool: a game changer for strengthening national regulatory capacity                                                                                           | 1                                                                | Article            | 9                           |
| 313 | Combining parenting and economic strengthening programmes to reduce violence against children: a cluster randomised controlled trial with predominantly male caregivers in rural Tanzania | 1                                                                | Article            | 5                           |
| 314 | The potential global gains in health and revenue from increased taxation of tobacco, alcohol and sugar-sweetened beverages: a modelling analysis (vol 5, e002143, 2020)                   | 1                                                                | Correction         | 0                           |
| 315 | Smokeless tobacco control in India: policy review and lessons for high-burden countries                                                                                                   | 1                                                                | Review             | 7                           |

| No. | Title                                                                                                                                                                  | COVID-19-related publication = 0<br>non-COVID-19 publication = 1 | Document type      | Number of citations in 2021 |
|-----|------------------------------------------------------------------------------------------------------------------------------------------------------------------------|------------------------------------------------------------------|--------------------|-----------------------------|
| 316 | Hypothesis to explain the severe form of COVID-19 in Northern Italy                                                                                                    | 0                                                                | Editorial Material | 12                          |
| 317 | Voices from the frontline: findings from a thematic analysis of a rapid online global survey of maternal and newborn health professionals facing the COVID-19 pandemic | 0                                                                | Article            | 51                          |
| 318 | Evidence from the Kaduna State Health Accounts on the pattern of sub-national health spending in Nigeria, 2016                                                         | 1                                                                | Article            | 0                           |
| 319 | The good and the bad: using C reactive protein to distinguish bacterial from non-bacterial infection among febrile patients in low-resource settings                   | 1                                                                | Article            | 9                           |
| 320 | Community health workers and early detection of breast cancer in low-income and middle-income countries: a systematic scoping review of the literature                 | 1                                                                | Review             | 7                           |
| 321 | Ethical considerations in global surgery: a scoping review                                                                                                             | 1                                                                | Review             | 6                           |
| 322 | Estimating the incidence of abortion: a comparison of five approaches in Ghana                                                                                         | 1                                                                | Article            | 8                           |
| 323 | The impact of gender equity in agriculture on nutritional status, diets, and household food security: a mixed-methods systematic review                                | 1                                                                | Review             | 4                           |
| 324 | Towards universal health coverage: achievements and challenges of 10 years of healthcare reform in China                                                               | 1                                                                | Article            | 10                          |
| 325 | What is considered as global health scholarship? A meta-knowledge analysis of global health journals and definitions                                                   | 1                                                                | Article            | 2                           |
| 326 | Extending the measurement of quality beyond service delivery indicators                                                                                                | 1                                                                | Editorial Material | 0                           |
| 327 | Availability and affordability of medicines and cardiovascular outcomes in 21 high-income, middle-income and low-income countries                                      | 1                                                                | Article            | 7                           |
| 328 | Targeting anticorruption interventions at the front line: developmental governance in health systems                                                                   | 1                                                                | Article            | 3                           |
| 329 | Are asylum seekers, refugees and foreign migrants considered in the COVID-19 vaccine discourse?                                                                        | 0                                                                | Editorial Material | 14                          |
| 330 | Spatial-temporal trends in forced migrant mortality, 2014-2018                                                                                                         | 1                                                                | Article            | 0                           |
| 331 | In pursuit of 'safe' water: the burden of personal injury from water fetching in 21 low-income and middle-income                                                       | 1                                                                | Article            | 13                          |



| No. | Title                                                                                                                                                   | COVID-19-related publication = 0<br>non-COVID-19 publication = 1 | Document type      | Number of citations in 2021 |
|-----|---------------------------------------------------------------------------------------------------------------------------------------------------------|------------------------------------------------------------------|--------------------|-----------------------------|
|     | countries                                                                                                                                               |                                                                  |                    |                             |
| 332 | Impact of overweight and obesity on life expectancy, quality-adjusted life years and lifetime costs in the adult population of Ghana                    | 1                                                                | Article            | 1                           |
| 333 | Toward a complete estimate of physical and psychosocial morbidity from prolonged obstructed labour: a modelling study based on clinician survey         | 1                                                                | Article            | 2                           |
| 334 | The 6-star doctor? Physicians' communication of poor prognosis to patients and their families in Cape Coast, Ghana                                      | 1                                                                | Article            | 1                           |
| 335 | The reactive vaccination campaign against cholera emergency in camps for internally displaced persons, Borno, Nigeria, 2017: a two-stage cluster survey | 1                                                                | Article            | 0                           |
| 336 | Is it about the 'where' or thSare 'how'? Comment on Defining global health as public health somewhere else                                              | 1                                                                | Editorial Material | 2                           |
| 337 | Progress on sodium reduction in South Korea                                                                                                             | 1                                                                | Article            | 9                           |
| 338 | Adopting locally the lessons learned globally: a call to action for academic medical centres in the USA                                                 | 1                                                                | Editorial Material | 0                           |
| 339 | The potential global gains in health and revenue from increased taxation of tobacco, alcohol and sugar-sweetened beverages: a modelling analysis        | 1                                                                | Article            | 6                           |
| 340 | Reducing maternal mortality in China in the era of the two-child policy                                                                                 | 1                                                                | Article            | 11                          |
| 341 | The quality of malaria care in 25 low-income and middle-income countries                                                                                | 1                                                                | Article            | 1                           |
| 342 | Mass media campaigns to reduce unnecessary caesarean sections: a systematic review                                                                      | 1                                                                | Review             | 5                           |
| 343 | Are the poorest poor being left behind? Estimating global inequalities in reproductive, maternal, newborn and child health                              | 1                                                                | Article            | 3                           |
| 344 | Protecting essential health services in low-income and middle-income countries and humanitarian settings while responding to the COVID-19 pandemic      | 0                                                                | Article            | 13                          |
| 345 | Subsidise the test, the treatment or both? Results of an individually randomised controlled trial of the management of                                  | 1                                                                | Article            | 2                           |

| No. | Title                                                                                                                                                           | COVID-19-related publication = 0<br>non-COVID-19 publication = 1 | Document type      | Number of citations in 2021 |
|-----|-----------------------------------------------------------------------------------------------------------------------------------------------------------------|------------------------------------------------------------------|--------------------|-----------------------------|
|     | suspected malaria fevers in the retail sector in western Kenya                                                                                                  |                                                                  |                    |                             |
| 346 | Building a new platform to support public health emergency response in Africa: the AFENET Corps of Disease Detectives, 2018-2019                                | 1                                                                | Article            | 0                           |
| 347 | Delivering maternal and neonatal health interventions in conflict settings: a systematic review                                                                 | 1                                                                | Review             | 2                           |
| 348 | Spatial and spatio-temporal methods for mapping malaria risk: a systematic review                                                                               | 1                                                                | Review             | 5                           |
| 349 | Is time running out? The urgent need for appropriate global health curricula in Germany                                                                         | 1                                                                | Article            | 1                           |
| 350 | On the path to Universal Health Coverage: aligning ongoing health systems reforms in India                                                                      | 1                                                                | Editorial Material | 1                           |
| 351 | WICID framework version 1.0: criteria and considerations to guide evidence-informed decision-making on non-pharmacological interventions targeting COVID-19     | 0                                                                | Article            | 4                           |
| 352 | Cost-effectiveness of new antiviral treatments for non-genotype 1 hepatitis C virus infection in China: a societal perspective                                  | 1                                                                | Article            | 1                           |
| 353 | Does adherence to evidence-based practices during childbirth prevent perinatal mortality? A post-hoc analysis of 3,274 births in Uttar Pradesh, India           | 1                                                                | Article            | 0                           |
| 354 | Community engagement for successful COVID-19 pandemic response: 10 lessons from Ebola outbreak responses in Africa                                              | 0                                                                | Editorial Material | 9                           |
| 355 | How to set up government-led national hygiene communication campaigns to combat COVID-19: a strategic blueprint                                                 | 0                                                                | Article            | 2                           |
| 356 | Effectiveness of primary care gatekeeping: difference-in-differences evaluation of a pilot scheme in China                                                      | 1                                                                | Article            | 1                           |
| 357 | Refocusing vitamin A supplementation programmes to reach the most vulnerable                                                                                    | 1                                                                | Article            | 4                           |
| 358 | Fairer financing of vaccines in a world living with COVID-19                                                                                                    | 0                                                                | Editorial Material | 1                           |
| 359 | The community health worker as service extender, cultural broker and social change agent: a critical interpretive synthesis of roles, intent and accountability | 1                                                                | Article            | 11                          |

| No. | Title                                                                                                                                                              | COVID-19-related publication = 0<br>non-COVID-19 publication = 1 | Document type      | Number of citations in 2021 |
|-----|--------------------------------------------------------------------------------------------------------------------------------------------------------------------|------------------------------------------------------------------|--------------------|-----------------------------|
| 360 | Improving the demand for birth registration: a discrete choice experiment in Ethiopia                                                                              | 1                                                                | Article            | 0                           |
| 361 | COVID-19: time for paradigm shift in the nexus between local, national and global health                                                                           | 0                                                                | Editorial Material | 22                          |
| 362 | Making sense of estimates of health aid from China                                                                                                                 | 1                                                                | Editorial Material | 1                           |
| 363 | The household economic burden of non-communicable diseases in 18 countries                                                                                         | 1                                                                | Article            | 16                          |
| 364 | Strengthening medical specialisation policy in low-income and middle-income countries                                                                              | 1                                                                | Article            | 0                           |
| 365 | Who are the real community health workers in Tshopo Province, Democratic Republic of the Congo? (vol 5, e001529corr1, 2020)                                        | 1                                                                | Correction         | 0                           |
| 366 | Community interventions with women's groups to improve women's and children's health in India: a mixed-methods systematic review of effects, enablers and barriers | 1                                                                | Review             | 1                           |
| 367 | Health system redesign for equity in maternal and newborn health must be codesigned, country led, adapted to context and fit for purpose                           | 1                                                                | Editorial Material | 3                           |
| 368 | Postneonatal under-5 mortality in peri-urban and rural Eastern Uganda, 2005-2015                                                                                   | 1                                                                | Article            | 0                           |
| 369 | Comparison of detection rate of 16 sampling methods for respiratory viruses: a Bayesian network meta-analysis of clinical data and systematic review               | 1                                                                | Review             | 2                           |
| 370 | 'Severe malnutrition': thinking deeplyS, communicating simply                                                                                                      | 1                                                                | Editorial Material | 8                           |
| 371 | Women's experiences of mistreatment during childbirth and their satisfaction with care: findings from a multicountry community-based study in four countries       | 1                                                                | Article            | 2                           |
| 372 | A systematic review and meta-analysis of the consequences of female genital mutilation on maternal and perinatal health outcomes in European and African countries | 1                                                                | Review             | 1                           |
| 373 | Social media and vaccine hesitancy                                                                                                                                 | 1                                                                | Article            | 124                         |
| 374 | Reclaiming comprehensive public health                                                                                                                             | 1                                                                | Editorial Material | 27                          |

| No. | Title                                                                                                                                                                                                  | COVID-19-related publication = 0<br>non-COVID-19 publication = 1 | Document type      | Number of citations in 2021 |
|-----|--------------------------------------------------------------------------------------------------------------------------------------------------------------------------------------------------------|------------------------------------------------------------------|--------------------|-----------------------------|
| 375 | Allocating resources to support universal health coverage: development of a geographical funding formula in Malawi                                                                                     | 1                                                                | Article            | 1                           |
| 376 | Effect of exposure to PM(10) on child health: evidence based on a large-scale survey from 184 cities in India                                                                                          | 1                                                                | Article            | 0                           |
| 377 | Implementing sustainable primary healthcare reforms: strategies from Costa Rica                                                                                                                        | 1                                                                | Review             | 2                           |
| 378 | Enhancing science preparedness for health emergencies in Africa through research capacity building                                                                                                     | 1                                                                | Editorial Material | 3                           |
| 379 | The Al Hol camp in Northeast Syria: health and humanitarian challenges                                                                                                                                 | 1                                                                | Editorial Material | 0                           |
| 380 | Just-in-time postnatal education programmes to improve newborn care practices: needs and opportunities in low-resource settings                                                                        | 1                                                                | Article            | 0                           |
| 381 | Mitigating the impact of COVID-19 on children's surgery in Africa                                                                                                                                      | 0                                                                | Editorial Material | 2                           |
| 382 | Engaging men to transform inequitable gender attitudes and prevent intimate partner violence: a cluster randomised controlled trial in North and South Kivu, Democratic Republic of Congo              | 1                                                                | Article            | 7                           |
| 383 | The promise and pitfalls of social science research in an emergency: lessons from studying the Zika epidemic in Brazil, 2015-2016                                                                      | 1                                                                | Article            | 3                           |
| 384 | Is development aid to strengthen health systems during protracted conflict a useful investment? The case of South Sudan, 2011-2015                                                                     | 1                                                                | Article            | 2                           |
| 385 | How antibiotics are used in pig farming: a mixed-methods study of pig farmers, feed mills and veterinarians in Thailand                                                                                | 1                                                                | Article            | 10                          |
| 386 | Childhood morbidity and its determinants: evidence from 31 countries in sub-Saharan Africa                                                                                                             | 1                                                                | Article            | 4                           |
| 387 | Bridging research integrity and global health epidemiology (BRIDGE) statement: guidelines for good epidemiological practice                                                                            | 1                                                                | Article            | 2                           |
| 388 | Bridging research integrity and global health epidemiology (BRIDGE) guidelines: explanation and elaboration                                                                                            | 1                                                                | Article            | 2                           |
| 389 | Documenting the challenges of conducting research on sexual and reproductive health and rights (SRHR) of persons with disabilities in a low-and-middle income country setting: lessons from Bangladesh | 1                                                                | Article            | 0                           |

| No. | Title                                                                                                                                                                                                                              | COVID-19-related publication = 0<br>non-COVID-19 publication = 1 | Document type                    | Number of citations in 2021 |
|-----|------------------------------------------------------------------------------------------------------------------------------------------------------------------------------------------------------------------------------------|------------------------------------------------------------------|----------------------------------|-----------------------------|
| 390 | Multilevel modelling and multiple group analysis of disparities in continuity of care and viral suppression among adolescents and youths living with HIV in Nigeria                                                                | 1                                                                | Article                          | 0                           |
| 391 | Intimate partner violence in 46 low-income and middle-income countries: an appraisal of the most vulnerable groups of women using national health surveys                                                                          | 1                                                                | Article                          | 21                          |
| 392 | Establishment of a road traffic trauma registry for northern Sri Lanka                                                                                                                                                             | 1                                                                | Article;<br>Proceedings<br>Paper | 2                           |
| 393 | Closing the gap on institutional delivery in northern India: a case study of how integrated machine learning approaches can enable precision public health                                                                         | 1                                                                | Article                          | 2                           |
| 394 | Timing and determinants of age at menarche in low-income and middle-income countries                                                                                                                                               | 1                                                                | Article                          | 3                           |
| 395 | Unprecedented reduction in births of very low birthweight (VLBW) and extremely low birthweight (ELBW) infants during the COVID-19 lockdown in Ireland: a 'natural experiment' allowing analysis of data from the prior two decades | 0                                                                | Article                          | 59                          |
| 396 | Using strategic price negotiations to contain costs and expand access to medicines in China                                                                                                                                        | 1                                                                | Editorial Material               | 2                           |
| 397 | Embedded research to advance primary health care                                                                                                                                                                                   | 1                                                                | Editorial Material               | 5                           |
| 398 | The international and domestic politics of type 2 diabetes policy reform in Brazil                                                                                                                                                 | 1                                                                | Article                          | 0                           |
| 399 | Transmission risk of respiratory viruses in natural and mechanical ventilation environments: implications for SARS-CoV-2 transmission in Africa                                                                                    | 0                                                                | Article                          | 3                           |
| 400 | Together we move a mountain: celebrating a decade of the Emerging Voices for Global Health network                                                                                                                                 | 1                                                                | Editorial Material               | 1                           |
| 401 | Prioritising the role of community health workers in the COVID-19 response                                                                                                                                                         | 0                                                                | Article                          | 35                          |
| 402 | Spatial and epidemiological drivers of <i>Plasmodium falciparum</i> malaria among adults in the Democratic Republic of the Congo                                                                                                   | 1                                                                | Article                          | 5                           |
| 403 | Power and politics: the case for linking resilience to health system governance                                                                                                                                                    | 1                                                                | Editorial Material               | 15                          |

| No. | Title                                                                                                                                                  | COVID-19-related publication = 0<br>non-COVID-19 publication = 1 | Document type      | Number of citations in 2021 |
|-----|--------------------------------------------------------------------------------------------------------------------------------------------------------|------------------------------------------------------------------|--------------------|-----------------------------|
| 404 | Better data for better action: rethinking road injury data in francophone West Africa                                                                  | 1                                                                | Editorial Material | 3                           |
| 405 | The potential effects of widespread community transmission of SARS-CoV-2 infection in the World Health Organization African Region: a predictive model | 0                                                                | Article            | 30                          |
| 406 | Gendered implications of the COVID-19 pandemic for policies and programmes in humanitarian settings                                                    | 0                                                                | Editorial Material | 9                           |
| 407 | Validating women's reports of antenatal and postnatal care received in Bangladesh, Cambodia and Kenya                                                  | 1                                                                | Article            | 7                           |
| 408 | Advancing alcohol research in low-income and middle-income countries: a global alcohol environment framework                                           | 1                                                                | Article            | 14                          |
| 409 | Ending TB in Southeast Asia: current resources are not enough                                                                                          | 1                                                                | Article            | 3                           |
| 410 | Implementing essential interventions for cardiovascular disease risk management in primary healthcare: lessons from Eastern Europe and Central Asia    | 1                                                                | Article            | 2                           |
| 411 | Women, children and adolescents in conflict countries: an assessment of inequalities in intervention coverage and survival                             | 1                                                                | Article            | 5                           |
| 412 | Plasmodium falciparum resistance to sulfadoxine-pyrimethamine in Africa: a systematic analysis of national trends                                      | 1                                                                | Article            | 3                           |
| 413 | Combating the COVID-19 pandemic in a resource-constrained setting: insights from initial response in India                                             | 0                                                                | Article            | 8                           |
| 414 | Intimate partner violence among women with and without disabilities: a pooled analysis of baseline data from seven violence-prevention programmes      | 1                                                                | Article            | 3                           |
| 415 | Country performance against COVID-19: rankings for 35 countries                                                                                        | 0                                                                | Article            | 5                           |
| 416 | Planning prompts to promote uptake of HIV services among men: a randomised trial in rural Uganda                                                       | 1                                                                | Article            | 0                           |
| 417 | Using 'smart regulation' to tackle antimicrobial resistance in low-income and middle-income countries                                                  | 1                                                                | Editorial Material | 3                           |
| 418 | The syndemic of COVID-19 and gender-based violence in humanitarian settings: leveraging lessons from Ebola in the Democratic Republic of Congo         | 0                                                                | Editorial Material | 4                           |
| 419 | Reusability of filtering facepiece respirators after decontamination through drying and germicidal UV irradiation                                      | 1                                                                | Article            | 4                           |

| No. | Title                                                                                                                                                     | COVID-19-related publication = 0<br>non-COVID-19 publication = 1 | Document type      | Number of citations in 2021 |
|-----|-----------------------------------------------------------------------------------------------------------------------------------------------------------|------------------------------------------------------------------|--------------------|-----------------------------|
| 420 | Towards systematic evaluation of epidemic responses during humanitarian crises: a scoping review of existing public health evaluation frameworks          | 1                                                                | Review             | 6                           |
| 421 | Understanding why at-risk population segments do not seek care for tuberculosis: a precision public health approach in South India                        | 1                                                                | Article            | 3                           |
| 422 | Using critical information to strengthen pandemic preparedness: the role of national public health agencies                                               | 1                                                                | Article            | 7                           |
| 423 | Cost and cost drivers associated with setting-up a prime vendor system to complement the national medicines supply chain in Tanzania                      | 1                                                                | Article            | 0                           |
| 424 | Policy dialogue as a collaborative tool for multistakeholder health governance: a scoping study                                                           | 1                                                                | Article            | 3                           |
| 425 | The health of internally displaced children in sub-Saharan Africa: a scoping review                                                                       | 1                                                                | Review             | 0                           |
| 426 | The role of the state government, civil society and programmes across sectors in stunting reduction in Chhattisgarh, India, 2006-2016                     | 1                                                                | Article            | 1                           |
| 427 | Measurement and accountability for maternal, newborn and child health: fit for 2030?                                                                      | 1                                                                | Editorial Material | 4                           |
| 428 | Community health workers for pandemic response: a rapid evidence synthesis                                                                                | 1                                                                | Article            | 24                          |
| 429 | Bridging a false dichotomy in the COVID-19 response: a public health approach to the 'lockdown' debate                                                    | 0                                                                | Editorial Material | 12                          |
| 430 | Using implementation science theories and frameworks in global health                                                                                     | 1                                                                | Article            | 16                          |
| 431 | Understanding pretreatment loss to follow-up of tuberculosis patients: an explanatory qualitative study in Chennai, India                                 | 1                                                                | Article            | 6                           |
| 432 | The availability of global guidance for the promotion of women's, newborns', children's and adolescents' health and nutrition in conflicts                | 1                                                                | Article            | 3                           |
| 433 | Undernutrition, polygynous context and family structure: a multilevel analysis of cross-sectional surveys of 350 000 mother-child pairs from 32 countries | 1                                                                | Article            | 2                           |

| No. | Title                                                                                                                                                                                                                         | COVID-19-related publication = 0<br>non-COVID-19 publication = 1 | Document type      | Number of citations in 2021 |
|-----|-------------------------------------------------------------------------------------------------------------------------------------------------------------------------------------------------------------------------------|------------------------------------------------------------------|--------------------|-----------------------------|
| 434 | Community engagement for COVID-19 prevention and control: a rapid evidence synthesis                                                                                                                                          | 0                                                                | Article            | 53                          |
| 435 | Tuberculosis case fatality in India: a systematic review and meta-analysis                                                                                                                                                    | 1                                                                | Review             | 7                           |
| 436 | Burden of cardiovascular diseases associated with fine particulate matter in Beijing, China: an economic modelling study                                                                                                      | 1                                                                | Article            | 2                           |
| 437 | Factors associated with head circumference and indices of cognitive development in early childhood                                                                                                                            | 1                                                                | Article            | 2                           |
| 438 | Symptoms of a broken system: the gender gaps in COVID-19 decision-making                                                                                                                                                      | 0                                                                | Editorial Material | 18                          |
| 439 | Travel time and perinatal mortality after emergency caesarean sections: an evaluation of the 2-hour proximity indicator in Sierra Leone                                                                                       | 1                                                                | Article            | 5                           |
| 440 | The evolving picture of SARS-CoV-2 and COVID-19 in children: critical knowledge gaps                                                                                                                                          | 0                                                                | Editorial Material | 5                           |
| 441 | COVID-19 as social disability: the opportunity of social empathy for empowerment                                                                                                                                              | 0                                                                | Editorial Material | 4                           |
| 442 | A systematic review of substandard, falsified, unlicensed and unregistered medicine sampling studies: a focus on context, prevalence, and quality                                                                             | 1                                                                | Review             | 4                           |
| 443 | Operational research to support equitable non-communicable disease policy in low-income and middle-income countries in the sustainable development era: a scoping review                                                      | 1                                                                | Review             | 1                           |
| 444 | Off the back burner: diverse and gender-inclusive decision-making for COVID-19 response and recovery                                                                                                                          | 0                                                                | Editorial Material | 13                          |
| 445 | Arts-based approaches to promoting health in sub-Saharan Africa: a scoping review                                                                                                                                             | 1                                                                | Review             | 6                           |
| 446 | COVID-19: maintaining essential rehabilitation services across the care continuum                                                                                                                                             | 0                                                                | Editorial Material | 49                          |
| 447 | Cost-effectiveness of different strategies for screening and treatment of <i>Strongyloides stercoralis</i> migrants from endemic countries to the European Union                                                              | 1                                                                | Article            | 5                           |
| 448 | The effects of the integration of an economic strengthening and HIV prevention education programme on the prevalence of sexually transmitted infections and savings behaviours among adolescents: a full-factorial randomised | 1                                                                | Article            | 2                           |



| No. | Title                                                                                                                                                                 | COVID-19-related publication = 0<br>non-COVID-19 publication = 1 | Document type      | Number of citations in 2021 |
|-----|-----------------------------------------------------------------------------------------------------------------------------------------------------------------------|------------------------------------------------------------------|--------------------|-----------------------------|
|     | controlled trial in South Africa                                                                                                                                      |                                                                  |                    |                             |
| 449 | Covid-19 and mobile phone hygiene in healthcare settings                                                                                                              | 0                                                                | Editorial Material | 9                           |
| 450 | What does 'leave no one behind' mean for humanitarian crises-affected populations in the COVID-19 pandemic?                                                           | 0                                                                | Editorial Material | 5                           |
| 451 | Addressing the challenges of regulatory systems strengthening in small states                                                                                         | 1                                                                | Article            | 2                           |
| 452 | Lessons from a Health Policy and Systems Research programme exploring the quality and coverage of newborn care in Kenya                                               | 1                                                                | Article            | 2                           |
| 453 | Temporal trends in coverage, quality and equity of maternal and child health services in Rwanda, 2000-2015                                                            | 1                                                                | Article            | 2                           |
| 454 | Not just money: what mothers value in conditional cash transfer programs in India                                                                                     | 1                                                                | Article            | 1                           |
| 455 | Build back stronger universal health coverage systems after the COVID-19 pandemic: the need for better governance and linkage with universal social protection        | 0                                                                | Editorial Material | 7                           |
| 456 | Predicted COVID-19 fatality rates based on age, sex, comorbidities and health system capacity                                                                         | 0                                                                | Article            | 30                          |
| 457 | Association between early essential newborn care and breastfeeding outcomes in eight countries in Asia and the Pacific: a cross-sectional observational -study        | 1                                                                | Article            | 9                           |
| 458 | Homecare for sick family members while waiting for medical help during the 2014-2015 Ebola outbreak in Sierra Leone: a mixed methods study                            | 1                                                                | Article            | 1                           |
| 459 | Implementing the routine immunisation data module and dashboard of DHIS2 in Nigeria, 2014-2019                                                                        | 1                                                                | Article            | 0                           |
| 460 | The impact of diabetes on the productivity and economy of Bangladesh                                                                                                  | 1                                                                | Article            | 6                           |
| 461 | Most of what they do, we cannot do! How lay health workers respond to barriers to uptake and retention in HIV care among pregnant and breastfeeding mothers in Malawi | 1                                                                | Article            | 3                           |

| No. | Title                                                                                                                                                               | COVID-19-related publication = 0<br>non-COVID-19 publication = 1 | Document type | Number of citations in 2021 |
|-----|---------------------------------------------------------------------------------------------------------------------------------------------------------------------|------------------------------------------------------------------|---------------|-----------------------------|
| 462 | Diagnostic performance of a point-of-care saliva urea nitrogen dipstick to screen for kidney disease in low-resource settings where serum creatinine is unavailable | 1                                                                | Article       | 2                           |
| 463 | Universal access to essential health information: accelerating progress towards universal health coverage and other SDG health targets                              | 1                                                                | Article       | 4                           |
| 464 | Safe management of bodies of deceased persons with suspected or confirmed COVID-19: a rapid systematic review                                                       | 0                                                                | Review        | 16                          |
| 465 | The prevalence of noma in northwest Nigeria                                                                                                                         | 1                                                                | Article       | 5                           |
| 466 | Delivering trauma and rehabilitation interventions to women and children in conflict settings: a systematic review                                                  | 1                                                                | Review        | 6                           |
| 467 | Delivery of sexual and reproductive health interventions in conflict settings: a systematic review                                                                  | 1                                                                | Review        | 4                           |
| 468 | How primary healthcare workers obtain information during consultations to aid safe prescribing in low-income and lower middle-income countries: a systematic review | 1                                                                | Review        | 1                           |
| 469 | Forty-two years of responding to Ebola virus outbreaks in Sub-Saharan Africa: a review                                                                              | 1                                                                | Review        | 12                          |
| 470 | Achieving flexible competence: bridging the investment dichotomy between infectious diseases and cancer                                                             | 1                                                                | Article       | 0                           |
| 471 | Bacterial versus non-bacterial infections: a methodology to support use-case-driven product development of diagnostics                                              | 1                                                                | Article       | 1                           |
| 472 | Lactational amenorrhoea among adolescent girls in low-income and middle-income countries: a systematic scoping review                                               | 1                                                                | Review        | 0                           |
| 473 | Precarity and clinical determinants of healthcare-seeking behaviour and antibiotic use in rural Laos and Thailand                                                   | 1                                                                | Article       | 4                           |
| 474 | Measuring experiences of facility-based care for pregnant women and newborns: a scoping review                                                                      | 1                                                                | Review        | 6                           |
| 475 | Cash transfers and child nutritional outcomes: a systematic review and meta-analysis                                                                                | 1                                                                | Review        | 5                           |
| 476 | Use of social media platforms by manufacturers to market breast-milk substitutes in South Africa                                                                    | 1                                                                | Article       | 5                           |
| 477 | Empiricism in non-communicable disease mortality measurement for the Asia-Pacific: Lost in translation (vol 5, e003626, 2020)                                       | 1                                                                | Correction    | 0                           |

| No. | Title                                                                                                                                             | COVID-19-related publication = 0<br>non-COVID-19 publication = 1 | Document type      | Number of citations in 2021 |
|-----|---------------------------------------------------------------------------------------------------------------------------------------------------|------------------------------------------------------------------|--------------------|-----------------------------|
| 478 | Health of transgender men in low-income and middle-income countries: a scoping review                                                             | 1                                                                | Review             | 7                           |
| 479 | Estimating the cost of interventions to improve water, sanitation and hygiene in healthcare facilities across India                               | 1                                                                | Article            | 1                           |
| 480 | How previous epidemics enable timelier COVID-19 responses: an empirical study using organisational memory theory                                  | 0                                                                | Article            | 1                           |
| 481 | Trends and sociodemographic inequalities in the use of caesarean section in Indonesia, 1987-2017                                                  | 1                                                                | Article            | 2                           |
| 482 | The impact of demonetisation on the utilisation of hospital services, patient outcomes and finances: a multicentre observational study from India | 1                                                                | Article            | 0                           |
| 483 | Social and political determinants of health in the occupied Palestine territory (oPt) during the COVID-19 pandemic: who is responsible?           | 0                                                                | Editorial Material | 4                           |
| 484 | The cost-effectiveness of hypertension management in low-income and middle-income countries: a review                                             | 1                                                                | Review             | 7                           |
| 485 | Factors influencing undernutrition among children under 5 years from cocoa-growing communities in Bougainville                                    | 1                                                                | Article            | 1                           |
| 486 | Prevalence and incidence of HIV among female sex workers and their clients: modelling the potential effects of intervention in Rwanda             | 1                                                                | Article            | 2                           |
| 487 | Ethnic and racial disparities in COVID-19-related deaths: counting the trees, hiding the forest                                                   | 0                                                                | Editorial Material | 48                          |
| 488 | The global and national burden of chronic kidney disease attributable to ambient fine particulate matter air pollution: a modelling study         | 1                                                                | Article            | 16                          |
| 489 | What the percentage of births in facilities does not measure: readiness for emergency obstetric care and referral in Senegal                      | 1                                                                | Article            | 2                           |
| 490 | Reimagining global health as the sharing of power                                                                                                 | 1                                                                | Editorial Material | 1                           |
| 491 | Length of maternal schooling and children's risk of malaria infection: evidence from a natural experiment in Uganda                               | 1                                                                | Article            | 0                           |
| 492 | Global health, global surgery and mass casualties: II. Mass casualty centre resources, equipment and implementation                               | 1                                                                | Article            | 2                           |
| 493 | A framework for identifying and learning from countries that demonstrated exemplary performance in improving health                               | 1                                                                | Article            | 4                           |

| No. | Title                                                                                                                                                                                 | COVID-19-related publication = 0<br>non-COVID-19 publication = 1 | Document type      | Number of citations in 2021 |
|-----|---------------------------------------------------------------------------------------------------------------------------------------------------------------------------------------|------------------------------------------------------------------|--------------------|-----------------------------|
|     | outcomes and systems                                                                                                                                                                  |                                                                  |                    |                             |
| 494 | Impact of a demand-side integrated WASH and nutrition community-based care group intervention on behavioural change: a randomised controlled trial in western Kenya                   | 1                                                                | Article            | 2                           |
| 495 | Geospatial evaluation of trade-offs between equity in physical access to healthcare and health systems efficiency                                                                     | 1                                                                | Article            | 5                           |
| 496 | Experience and perspectives on palliative or end-of-life care of Chinese people and their families as immigrants to high-income countries: a systematic review and thematic synthesis | 1                                                                | Review             | 2                           |
| 497 | Bringing a health systems modelling approach to complex evaluations: multicountry applications in HIV, TB and malaria                                                                 | 1                                                                | Article            | 0                           |
| 498 | Health system redesign for maternal and newborn survival: rethinking care models to close the global equity gap                                                                       | 1                                                                | Article            | 14                          |
| 499 | Learning from LMICs: best practices for leveraging sentinel surveillance systems to track the US COVID-19 pandemic                                                                    | 0                                                                | Editorial Material | 0                           |
| 500 | Contextual equipoise: a novel concept to inform ethical implications for implementation research in low-income and middle-income countries                                            | 1                                                                | Article            | 3                           |
| 501 | Magnitude, temporal trends and inequality in global burden of tracheal, bronchus and lung cancer: findings from the Global Burden of Disease Study 2017                               | 1                                                                | Article            | 3                           |

**Data source:** Web of Science

**Table S3 List of articles published in *Bulletin of the World Health Organization* in 2020**

| No. | Title                                                                                                                             | COVID-19-related publication = 0<br>non-COVID-19 publication = 1 | Document type      | Number of citations in 2021 |
|-----|-----------------------------------------------------------------------------------------------------------------------------------|------------------------------------------------------------------|--------------------|-----------------------------|
| 1   | 2020: Year of the Nurse and Midwife                                                                                               | 1                                                                | News Item          | 0                           |
| 2   | A combination approach of behavioural and biomedical interventions for prevention of sexually transmitted infections              | 1                                                                | Editorial Material | 5                           |
| 3   | A comparison of five paediatric dosing guidelines for antibiotics                                                                 | 1                                                                | Article            | 2                           |
| 4   | A disclosure form for work submitted to medical journals - a proposal from the International Committee of Medical Journal Editors | 1                                                                | Editorial Material | 0                           |
| 5   | A monitoring and evaluation gap for WHO's community health worker guidelines, Botswana                                            | 1                                                                | Editorial Material | 0                           |
| 6   | A programme to improve quality of care for patients with chronic diseases, Kazakhstan                                             | 1                                                                | Article            | 1                           |
| 7   | A protracted pandemic                                                                                                             | 0                                                                | News Item          | 0                           |
| 8   | A research and development fund for new treatments for bacterial infections                                                       | 1                                                                | Editorial Material | 1                           |
| 9   | A review of policies and programmes for human organ and tissue donations and transplantations, WHO African Region                 | 1                                                                | Review             | 3                           |
| 10  | A survey of nongovernmental organizations on their use of WHO's prequalification programme                                        | 1                                                                | Article            | 0                           |
| 11  | Abuse allegations investigated                                                                                                    | 1                                                                | News Item          | 0                           |
| 12  | Accelerating access to medicines in a changing world                                                                              | 1                                                                | Editorial Material | 2                           |
| 13  | Accelerating COVID-19 products                                                                                                    | 0                                                                | News Item          | 0                           |
| 14  | Accelerating regulation in response to COVID-19                                                                                   | 0                                                                | News Item          | 2                           |
| 15  | Access to antiretrovirals threatened                                                                                              | 1                                                                | News Item          | 0                           |
| 16  | Achieving sustainable health equity                                                                                               | 1                                                                | Editorial Material | 0                           |
| 17  | ACT Accelerator funding gap                                                                                                       | 0                                                                | News Item          | 0                           |
| 18  | ACT-Accelerator funding gap                                                                                                       | 0                                                                | News Item          | 0                           |
| 19  | Addressing barriers to primary health-care services for noncommunicable diseases in the African Region                            | 1                                                                | Editorial Material | 0                           |

| No. | Title                                                                                             | COVID-19-related publication = 0<br>non-COVID-19 publication = 1 | Document type      | Number of citations in 2021 |
|-----|---------------------------------------------------------------------------------------------------|------------------------------------------------------------------|--------------------|-----------------------------|
| 20  | Addressing social determinants of noncommunicable diseases in primary care: a systematic review   | 1                                                                | Review             | 7                           |
| 21  | Addressing the persistent inequities in immunization coverage                                     | 1                                                                | Editorial Material | 13                          |
| 22  | Africa wild polio free                                                                            | 1                                                                | News Item          | 0                           |
| 23  | Aid flown to Syria                                                                                | 1                                                                | News Item          | 0                           |
| 24  | Albania earthquake                                                                                | 1                                                                | News Item          | 0                           |
| 25  | Amesh Adalja: taking pandemic preparation seriously                                               | 0                                                                | News Item          | 0                           |
| 26  | An end to coercion: rights and decision-making in mental health care                              | 1                                                                | Article            | 10                          |
| 27  | Angela Nguku: for a societal approach to primary health care                                      | 1                                                                | News Item          | 0                           |
| 28  | Antenatal steroid efficacy                                                                        | 1                                                                | News Item          | 0                           |
| 29  | Antibiotic research and development guidance                                                      | 1                                                                | News Item          | 0                           |
| 30  | Artificial intelligence and the ongoing need for empathy, compassion and trust in healthcare      | 1                                                                | Article            | 11                          |
| 31  | Artificial intelligence in health care: accountability and safety                                 | 1                                                                | Article            | 10                          |
| 32  | Artificial intelligence, diagnostic imaging and neglected tropical diseases: ethical implications | 1                                                                | Editorial Material | 1                           |
| 33  | Assessment of health facility quality improvements, United Republic of Tanzania                   | 1                                                                | Article            | 3                           |
| 34  | Balancing risks and benefits of artificial intelligence in the health sector                      | 1                                                                | Editorial Material | 4                           |
| 35  | Baruch Fischhoff: the importance of testing messages                                              | 1                                                                | Editorial Material | 1                           |
| 36  | Behavioural and social sciences for better health: call for papers                                | 1                                                                | Editorial Material | 0                           |
| 37  | Beirut explosion                                                                                  | 1                                                                | News Item          | 0                           |
| 38  | Beirut explosion                                                                                  | 1                                                                | News Item          | 0                           |
| 39  | Breast cancer biosimilar prequalified                                                             | 1                                                                | News Item          | 0                           |
| 40  | Cancer incidence set to rise                                                                      | 1                                                                | News Item          | 0                           |

| No. | Title                                                                                                      | COVID-19-related publication = 0<br>non-COVID-19 publication = 1 | Document type      | Number of citations in 2021 |
|-----|------------------------------------------------------------------------------------------------------------|------------------------------------------------------------------|--------------------|-----------------------------|
| 41  | Charging for the use of survey instruments on population health: the case of quality-adjusted life years   | 1                                                                | Article            | 0                           |
| 42  | Cheryl Cohen: tracking respiratory diseases, informing policy                                              | 1                                                                | Editorial Material | 0                           |
| 43  | Collaboration on essential diagnostics                                                                     | 1                                                                | News Item          | 0                           |
| 44  | Communities, universal health coverage and primary health care                                             | 1                                                                | Article            | 4                           |
| 45  | Contact tracing for tuberculosis, Thailand                                                                 | 1                                                                | Article            | 3                           |
| 46  | Contact tracing for tuberculosis, Thailand (vol 98, pg 212, 2020)                                          | 1                                                                | Correction         | 0                           |
| 47  | Cost of HIV inaction                                                                                       | 1                                                                | News Item          | 0                           |
| 48  | Cost of maternal near miss and potentially life-threatening conditions, Kenya                              | 1                                                                | Article            | 0                           |
| 49  | Cost-effectiveness of emergency care interventions in low and middle-income countries: a systematic review | 1                                                                | Review             | 5                           |
| 50  | Costs of maternity leave to support breastfeeding; Brazil, Ghana and Mexico                                | 1                                                                | Article            | 6                           |
| 51  | COVAX momentum                                                                                             | 0                                                                | News Item          | 0                           |
| 52  | COVID 19 and the oxygen bottleneck                                                                         | 0                                                                | News Item          | 2                           |
| 53  | COVID-19 and sustainable development goals                                                                 | 0                                                                | Editorial Material | 9                           |
| 54  | COVID-19 children's book                                                                                   | 0                                                                | News Item          | 0                           |
| 55  | COVID-19 control strategies in Taizhou city, China                                                         | 0                                                                | Article            | 3                           |
| 56  | COVID-19 diagnostic initiative                                                                             | 0                                                                | News Item          | 0                           |
| 57  | COVID-19 human challenge guidance                                                                          | 0                                                                | News Item          | 0                           |
| 58  | COVID-19 in Africa                                                                                         | 0                                                                | News Item          | 0                           |
| 59  | COVID-19 response measures and violence against children                                                   | 0                                                                | Editorial Material | 8                           |
| 60  | COVID-19 schools guidance                                                                                  | 0                                                                | News Item          | 0                           |
| 61  | COVID-19 solidarity fund                                                                                   | 0                                                                | News Item          | 0                           |

| No. | Title                                                                                                                    | COVID-19-related publication = 0<br>non-COVID-19 publication = 1 | Document type      | Number of citations in 2021 |
|-----|--------------------------------------------------------------------------------------------------------------------------|------------------------------------------------------------------|--------------------|-----------------------------|
| 62  | Cutting trans fats                                                                                                       | 1                                                                | News Item          | 0                           |
| 63  | Data sharing for novel coronavirus (COVID-19)                                                                            | 0                                                                | Editorial Material | 35                          |
| 64  | Defining ethical standards for the application of digital tools to population health research                            | 1                                                                | Article            | 4                           |
| 65  | Delivery of essential surgery by family physicians                                                                       | 1                                                                | Article            | 0                           |
| 66  | Developing the health workforce for universal health coverage                                                            | 1                                                                | Article            | 12                          |
| 67  | Development and implementation of guidelines for the management of depression: a systematic review                       | 1                                                                | Review             | 8                           |
| 68  | Development assistance for community health workers in 114 low- and middle- income countries, 2007-2017                  | 1                                                                | Article            | 11                          |
| 69  | Digital health and COVID-19                                                                                              | 0                                                                | News Item          | 4                           |
| 70  | Ebola outbreak winds down                                                                                                | 1                                                                | News Item          | 0                           |
| 71  | Ebola outbreak winds down                                                                                                | 1                                                                | News Item          | 0                           |
| 72  | Ebola persisting                                                                                                         | 1                                                                | News Item          | 0                           |
| 73  | Ebola spreading                                                                                                          | 1                                                                | News Item          | 0                           |
| 74  | Economic evaluation of short treatment for multidrug-resistant tuberculosis, Ethiopia and South Africa: the STREAM trial | 1                                                                | Article            | 3                           |
| 75  | Effectiveness of generic direct-acting agents for the treatment of hepatitis C: systematic review and meta-analysis      | 1                                                                | Review             | 4                           |
| 76  | Emergency care in the pandemic                                                                                           | 0                                                                | News Item          | 1                           |
| 77  | Emergency care in the pandemic (vol 98, pg 650, 2020)                                                                    | 0                                                                | Correction         | 0                           |
| 78  | Emergency Financing for COVID-19                                                                                         | 0                                                                | News Item          | 0                           |
| 79  | Emergency, critical and operative care services for effective primary care                                               | 1                                                                | Editorial Material | 1                           |
| 80  | Ensuring access to affordable, timely vaccines in emergencies (vol 97, pg 851, 2019)                                     | 1                                                                | Correction         | 0                           |
| 81  | Ensuring equitable access to COVID-19 vaccines                                                                           | 0                                                                | News Item          | 4                           |



| No. | Title                                                                                                                            | COVID-19-related publication = 0<br>non-COVID-19 publication = 1 | Document type      | Number of citations in 2021 |
|-----|----------------------------------------------------------------------------------------------------------------------------------|------------------------------------------------------------------|--------------------|-----------------------------|
| 82  | Ensuring trustworthy use of artificial intelligence and big data analytics in health insurance                                   | 1                                                                | Article            | 4                           |
| 83  | Estimating illicit cigarette consumption using a tax-gap approach, India                                                         | 1                                                                | Article            | 0                           |
| 84  | Ethical barriers to artificial intelligence in the national health service, United Kingdom of Great Britain and Northern Ireland | 1                                                                | Editorial Material | 4                           |
| 85  | Ethical challenges of digital health technologies: Aadhaar, India                                                                | 1                                                                | Article            | 3                           |
| 86  | Ethical considerations for mystery shopper studies of pharmaceutical sales                                                       | 1                                                                | Editorial Material | 1                           |
| 87  | Ethical dilemmas posed by mobile health and machine learning in psychiatry research                                              | 1                                                                | Article            | 10                          |
| 88  | Ethical implications of conversational agents in global public health                                                            | 1                                                                | Editorial Material | 6                           |
| 89  | Evaluating the pandemic response                                                                                                 | 0                                                                | News Item          | 0                           |
| 90  | Evidence of behaviour change during an Ebola virus disease outbreak, Sierra Leone                                                | 1                                                                | Article            | 3                           |
| 91  | Fangcang shelter hospitals during the COVID-19 epidemic, Wuhan, China                                                            | 0                                                                | Article            | 3                           |
| 92  | Female genital mutilation's cost                                                                                                 | 1                                                                | News Item          | 0                           |
| 93  | Field-testing of primary health-care indicators, India                                                                           | 1                                                                | Article            | 2                           |
| 94  | Finding the SARS-CoV-2 source                                                                                                    | 0                                                                | News Item          | 0                           |
| 95  | Food insecurity                                                                                                                  | 1                                                                | News Item          | 0                           |
| 96  | Fostering local production of essential medicines in Nigeria                                                                     | 1                                                                | Editorial Material | 0                           |
| 97  | Four equity considerations for the use of artificial intelligence in public health                                               | 1                                                                | Editorial Material | 5                           |
| 98  | France pledges funds for WHO Academy                                                                                             | 1                                                                | News Item          | 0                           |
| 99  | Funding for neglected diseases                                                                                                   | 1                                                                | News Item          | 0                           |
| 100 | Gaps in access to essential medicines and health products for noncommunicable diseases and mental health conditions              | 1                                                                | Editorial Material | 3                           |
| 101 | Global food insecurity                                                                                                           | 1                                                                | News Item          | 0                           |

| No. | Title                                                                                                               | COVID-19-related publication = 0<br>non-COVID-19 publication = 1 | Document type      | Number of citations in 2021 |
|-----|---------------------------------------------------------------------------------------------------------------------|------------------------------------------------------------------|--------------------|-----------------------------|
| 102 | Global sales of oral antibiotics formulated for children                                                            | 1                                                                | Article            | 2                           |
| 103 | Gun-carrying restrictions and gun-related mortality, Colombia: a difference-in-difference design with fixed effects | 1                                                                | Article            | 3                           |
| 104 | Hand-hygiene compliance by hospital staff and incidence of healthcare-associated infections, Finland                | 1                                                                | Article            | 4                           |
| 105 | Harmful marketing of breast-milk substitutes                                                                        | 1                                                                | News Item          | 0                           |
| 106 | Health emergency resolution                                                                                         | 0                                                                | News Item          | 0                           |
| 107 | Health impacts of climate change and geopolitics: a call for papers                                                 | 1                                                                | Editorial Material | 1                           |
| 108 | Health initiative launched to fight COVID-19                                                                        | 0                                                                | News Item          | 0                           |
| 109 | Health systems under strain                                                                                         | 0                                                                | News Item          | 0                           |
| 110 | Health-care investments for the urban populations, Bangladesh and India                                             | 1                                                                | Article            | 1                           |
| 111 | Hearing loss: rising prevalence and impact (vol 97, pg 646, 2019)                                                   | 1                                                                | Correction         | 0                           |
| 112 | Hepatitis B progress                                                                                                | 1                                                                | News Item          | 0                           |
| 113 | Herpes simplex virus: global infection prevalence and incidence estimates, 2016                                     | 1                                                                | Article            | 55                          |
| 114 | HIV prevention and care as part of universal health coverage                                                        | 1                                                                | Editorial Material | 1                           |
| 115 | HIV prevention progress                                                                                             | 1                                                                | News Item          | 0                           |
| 116 | HIV testing guidelines                                                                                              | 1                                                                | News Item          | 0                           |
| 117 | Hospital trains on different tracks                                                                                 | 1                                                                | News Item          | 0                           |
| 118 | Hospital-provision of essential primary care in 56 countries: determinants and quality                              | 1                                                                | Article            | 3                           |
| 119 | How do we reimagine health in a digital age?                                                                        | 1                                                                | Editorial Material | 1                           |
| 120 | How to achieve trustworthy artificial intelligence for health                                                       | 1                                                                | Article            | 6                           |
| 121 | Immunization services interrupted                                                                                   | 1                                                                | News Item          | 0                           |
| 122 | Impact of COVID-19 response on global surgical volumes: an ongoing observational study                              | 0                                                                | Article            | 5                           |

| No. | Title                                                                                                      | COVID-19-related publication = 0<br>non-COVID-19 publication = 1 | Document type      | Number of citations in 2021 |
|-----|------------------------------------------------------------------------------------------------------------|------------------------------------------------------------------|--------------------|-----------------------------|
| 123 | Implementation of adverse event reporting for medical devices, India                                       | 1                                                                | Article            | 1                           |
| 124 | Improving pandemic resilience                                                                              | 0                                                                | News Item          | 0                           |
| 125 | Improving prevention, recognition and treatment of noma                                                    | 1                                                                | Editorial Material | 2                           |
| 126 | Improving quality of care in fragile, conflict-affected and vulnerable settings                            | 1                                                                | Editorial Material | 5                           |
| 127 | Improving the indicator for premature deaths from noncommunicable diseases                                 | 1                                                                | Editorial Material | 0                           |
| 128 | Inadequate climate change response                                                                         | 1                                                                | News Item          | 0                           |
| 129 | Incorporating natural ecosystems into global health and food security programmes                           | 1                                                                | Editorial Material | 0                           |
| 130 | Infertility: a continually neglected component of sexual and reproductive health and rights                | 1                                                                | Editorial Material | 5                           |
| 131 | Informal work and maternal and child health: a blind spot in public health and research                    | 1                                                                | Editorial Material | 6                           |
| 132 | Integrating specialist ophthalmic services into emergency medical teams                                    | 1                                                                | Editorial Material | 0                           |
| 133 | Integration of prevention and control measures for female genital schistosomiasis, HIV and cervical cancer | 1                                                                | Article            | 6                           |
| 134 | Intensifying vaccine production                                                                            | 0                                                                | News Item          | 3                           |
| 135 | Iraq and Somalia vaccination campaigns                                                                     | 1                                                                | News Item          | 0                           |
| 136 | Iron and folic acid consumption and changing social norms: cluster randomized field trial, Odisha, India   | 1                                                                | Article            | 1                           |
| 137 | Joao Aprigio Guerra de Almeida: supporting breastfeeding mothers                                           | 1                                                                | News Item          | 0                           |
| 138 | Karla Soares-Weiser: curating evidence to support knowledge translation                                    | 1                                                                | Editorial Material | 0                           |
| 139 | Kathryn Chu: delivering surgery as part of primary health care                                             | 1                                                                | News Item          | 0                           |
| 140 | Kirk R Smith: a life's work on improving air quality                                                       | 1                                                                | Editorial Material | 0                           |
| 141 | Legal and institutional foundations for universal health coverage, Kenya                                   | 1                                                                | Article            | 0                           |
| 142 | Legislating for public accountability in universal health coverage, Thailand                               | 1                                                                | Article            | 2                           |
| 143 | Lessons from a COVID-19 hospital, Republic of Korea                                                        | 0                                                                | Article            | 5                           |

| No. | Title                                                                                  | COVID-19-related publication = 0<br>non-COVID-19 publication = 1 | Document type      | Number of citations in 2021 |
|-----|----------------------------------------------------------------------------------------|------------------------------------------------------------------|--------------------|-----------------------------|
| 144 | Lockdown exposing children to violence                                                 | 0                                                                | News Item          | 0                           |
| 145 | Malaria progress challenged                                                            | 1                                                                | News Item          | 0                           |
| 146 | Maternal near-miss surveillance, Namibia                                               | 1                                                                | Article            | 5                           |
| 147 | Measles immunization delayed                                                           | 1                                                                | News Item          | 0                           |
| 148 | Measles in the Democratic Republic of the Congo                                        | 1                                                                | News Item          | 0                           |
| 149 | Measles surges                                                                         | 1                                                                | News Item          | 0                           |
| 150 | Measures to strengthen primary health-care systems in low- and middle-income countries | 1                                                                | Article            | 7                           |
| 151 | Measuring antibiotic availability and use in 20 low- and middle-income countries       | 1                                                                | Article            | 7                           |
| 152 | Medical certification of cause of death for COVID-19                                   | 0                                                                | Editorial Material | 9                           |
| 153 | Medicines dropped from Solidarity Trial                                                | 1                                                                | News Item          | 0                           |
| 154 | Melanie Saville: the end-to-end process needed for a SARS-CoV-2 vaccine                | 0                                                                | News Item          | 0                           |
| 155 | Mending the medicines supply chain                                                     | 1                                                                | News Item          | 0                           |
| 156 | Men's tobacco epidemic turns corner                                                    | 1                                                                | News Item          | 0                           |
| 157 | Mental health services disrupted                                                       | 1                                                                | News Item          | 0                           |
| 158 | Midori de Habich: the economist who ran Peru's health ministry                         | 1                                                                | News Item          | 0                           |
| 159 | Modelling for Taenia solium control strategies beyond 2020                             | 1                                                                | Article            | 5                           |
| 160 | Modelling human-to-human transmission of monkeypox                                     | 1                                                                | Editorial Material | 2                           |
| 161 | Modelling the effects of Wuhan's lockdown during COVID-19, China                       | 0                                                                | Article            | 24                          |
| 162 | More nurses needed                                                                     | 1                                                                | News Item          | 0                           |
| 163 | Mortality surveillance during the COVID-19 pandemic                                    | 0                                                                | Editorial Material | 11                          |
| 164 | National health insurance and surgical care for injured people, Ghana                  | 1                                                                | Article            | 1                           |

| No. | Title                                                                                    | COVID-19-related publication = 0<br>non-COVID-19 publication = 1 | Document type      | Number of citations in 2021 |
|-----|------------------------------------------------------------------------------------------|------------------------------------------------------------------|--------------------|-----------------------------|
| 165 | New coronavirus                                                                          | 0                                                                | News Item          | 0                           |
| 166 | New Ebola outbreak                                                                       | 1                                                                | News Item          | 0                           |
| 167 | New Ebola virus case                                                                     | 1                                                                | News Item          | 0                           |
| 168 | New funds for vaccines                                                                   | 0                                                                | News Item          | 0                           |
| 169 | New guidance on iron status assessment                                                   | 1                                                                | News Item          | 0                           |
| 170 | New SARS-CoV-2 strain                                                                    | 0                                                                | News Item          | 0                           |
| 171 | New stillbirth estimates                                                                 | 1                                                                | News Item          | 0                           |
| 172 | New tuberculosis guidelines                                                              | 1                                                                | News Item          | 0                           |
| 173 | New WHO expert group                                                                     | 1                                                                | News Item          | 0                           |
| 174 | Nipah virus circulation at human-bat interfaces, Cambodia                                | 1                                                                | Article            | 5                           |
| 175 | Non-clinical interventions to reduce unnecessary caesarean sections: WHO recommendations | 1                                                                | Editorial Material | 5                           |
| 176 | Novel coronavirus response                                                               | 0                                                                | News Item          | 0                           |
| 177 | Obesity and undernutrition                                                               | 1                                                                | News Item          | 0                           |
| 178 | Oral health guidance                                                                     | 1                                                                | News Item          | 0                           |
| 179 | Other considerations than: how much will universal health coverage cost?                 | 1                                                                | Article            | 1                           |
| 180 | Over-the-counter antibiotic sales in community and online pharmacies, China              | 1                                                                | Article            | 8                           |
| 181 | Pacific islands measles                                                                  | 1                                                                | News Item          | 0                           |
| 182 | Pandemic hits services                                                                   | 0                                                                | News Item          | 0                           |
| 183 | Pandemic response disrupts essential services                                            | 0                                                                | News Item          | 0                           |
| 184 | Pandemic response failure                                                                | 0                                                                | News Item          | 0                           |
| 185 | Partnership for pandemic and beyond                                                      | 0                                                                | News Item          | 0                           |

| No. | Title                                                                                              | COVID-19-related publication = 0<br>non-COVID-19 publication = 1 | Document type      | Number of citations in 2021 |
|-----|----------------------------------------------------------------------------------------------------|------------------------------------------------------------------|--------------------|-----------------------------|
| 186 | Personal digital health hubs for multiple conditions                                               | 1                                                                | Article            | 4                           |
| 187 | Pharmacies and primary care: a global development framework                                        | 1                                                                | Editorial Material | 3                           |
| 188 | Physically inactive children                                                                       | 1                                                                | News Item          | 0                           |
| 189 | Plan to tackle HIV drug resistance                                                                 | 1                                                                | News Item          | 0                           |
| 190 | Polio eradication pledge                                                                           | 1                                                                | News Item          | 0                           |
| 191 | Polio PHEIC                                                                                        | 1                                                                | News Item          | 0                           |
| 192 | Political economy of Thailand's tax-financed universal coverage scheme                             | 1                                                                | Article            | 1                           |
| 193 | Pooling financial resources for universal health coverage: options for reform                      | 1                                                                | Article            | 3                           |
| 194 | Pooling resources for universal health coverage                                                    | 1                                                                | News Item          | 0                           |
| 195 | Population-based projections of blood supply and demand, China, 2017-2036                          | 1                                                                | Article            | 5                           |
| 196 | Population-based projections of blood supply and demand, China, 2017-2036 (vol 98, pg 10, 2020)    | 1                                                                | Correction         | 0                           |
| 197 | Population-level data on antenatal screening for proteinuria; India, Mozambique, Nigeria, Pakistan | 1                                                                | Article            | 1                           |
| 198 | Pre-exposure prophylaxis against HIV                                                               | 1                                                                | News Item          | 0                           |
| 199 | Prevalence of Plasmodium falciparum lacking histidine-rich proteins 2 and 3: a systematic review   | 1                                                                | Review             | 6                           |
| 200 | Prevention of myopia, China                                                                        | 1                                                                | Editorial Material | 6                           |
| 201 | Primary health care and nutrition                                                                  | 1                                                                | Article            | 3                           |
| 202 | Primary health care and sustainable development goals                                              | 1                                                                | Article            | 10                          |
| 203 | Primary health care and the climate crisis                                                         | 1                                                                | Editorial Material | 3                           |
| 204 | Primary health care contributions to universal health coverage, Ethiopia                           | 1                                                                | Article            | 3                           |
| 205 | Primary health care, the Declaration of Astana and COVID-19                                        | 0                                                                | Article            | 9                           |
| 206 | Primary health care: realizing the vision                                                          | 1                                                                | Editorial Material | 0                           |

| No. | Title                                                                                                | COVID-19-related publication = 0<br>non-COVID-19 publication = 1 | Document type      | Number of citations in 2021 |
|-----|------------------------------------------------------------------------------------------------------|------------------------------------------------------------------|--------------------|-----------------------------|
| 207 | Priority pathogens and the antibiotic pipeline: an update                                            | 1                                                                | Editorial Material | 9                           |
| 208 | Promotion of behavioural change for health in a heterogeneous population                             | 1                                                                | Article            | 1                           |
| 209 | Providing mothers with fetal heart monitors                                                          | 1                                                                | News Item          | 0                           |
| 210 | Provision of community-based mental health care, Latvia                                              | 1                                                                | Article            | 1                           |
| 211 | Public health challenges and opportunities after COVID-19                                            | 0                                                                | Article            | 1                           |
| 212 | Public health round-up                                                                               | 1                                                                | News Item          | 0                           |
| 213 | Purchasing reforms and tracking health resources, Kenya                                              | 1                                                                | Article            | 2                           |
| 214 | Quitting tobacco with digital help                                                                   | 1                                                                | News Item          | 0                           |
| 215 | Reducing antibiotic use in livestock, China                                                          | 1                                                                | Editorial Material | 11                          |
| 216 | Reforms for financial protection schemes towards universal health coverage, Senegal                  | 1                                                                | Article            | 2                           |
| 217 | Refugees and COVID-19: achieving a comprehensive public health response                              | 0                                                                | Editorial Material | 19                          |
| 218 | Registration of antimicrobials, Kenya, Uganda and United Republic of Tanzania, 2018                  | 1                                                                | Article            | 0                           |
| 219 | Regulating COVID-19 products                                                                         | 0                                                                | News Item          | 0                           |
| 220 | Regulating digital health                                                                            | 1                                                                | News Item          | 0                           |
| 221 | Regulations to reduce risk of hearing damage in concert venues                                       | 1                                                                | Editorial Material | 0                           |
| 222 | Regulations to reduce risk of hearing damage in concert venues (vol 98, pg 367, 2020)                | 1                                                                | Correction         | 0                           |
| 223 | Retraction of WHO guidance on opioid use                                                             | 1                                                                | Editorial Material | 1                           |
| 224 | Rural retention strategies in the South-East Asia Region: evidence to guide effective implementation | 1                                                                | Editorial Material | 2                           |
| 225 | Sabina Faiz Rashid: research on community resilience                                                 | 1                                                                | News Item          | 0                           |
| 226 | Safeguards for the use of artificial intelligence and machine learning in global health              | 1                                                                | Editorial Material | 3                           |
| 227 | Sales of anti-cancer medicines; China, Indonesia, Kazakhstan, Malaysia, Philippines and Thailand     | 1                                                                | Article            | 2                           |

| No. | Title                                                                                 | COVID-19-related publication = 0<br>non-COVID-19 publication = 1 | Document type      | Number of citations in 2021 |
|-----|---------------------------------------------------------------------------------------|------------------------------------------------------------------|--------------------|-----------------------------|
| 228 | School hand hygiene                                                                   | 1                                                                | News Item          | 0                           |
| 229 | Sepsis summary                                                                        | 1                                                                | News Item          | 0                           |
| 230 | Shortage of personal protective equipment endangers health workers                    | 1                                                                | News Item          | 0                           |
| 231 | Simulation of pooled-sample analysis strategies for COVID-19 mass testing             | 0                                                                | Article            | 20                          |
| 232 | Simulation of the effects of COVID-19 testing rates on hospitalizations               | 0                                                                | Editorial Material | 2                           |
| 233 | Smallpox anniversary                                                                  | 1                                                                | News Item          | 0                           |
| 234 | Social, cultural and economic aspects of antimicrobial resistance                     | 1                                                                | Editorial Material | 3                           |
| 235 | Standardized epidemiological protocols for populations affected by volcanic eruptions | 1                                                                | Editorial Material | 0                           |
| 236 | Strengthening our resolve for primary health care                                     | 1                                                                | Editorial Material | 7                           |
| 237 | Surge in measles cases                                                                | 1                                                                | News Item          | 0                           |
| 238 | Surveillance for sickle cell disease, United Republic of Tanzania                     | 1                                                                | Article            | 2                           |
| 239 | Syrian hostilities intensify                                                          | 1                                                                | News Item          | 0                           |
| 240 | Systems approaches to support action on physical activity                             | 1                                                                | Editorial Material | 1                           |
| 241 | Tackling antimicrobial resistance in the COVID-19 pandemic                            | 0                                                                | Editorial Material | 72                          |
| 242 | Tackling COVID-19 in prisons                                                          | 0                                                                | News Item          | 0                           |
| 243 | Tackling the infodemic                                                                | 1                                                                | News Item          | 0                           |
| 244 | Tailored HIV programmes and universal health coverage                                 | 1                                                                | Article            | 6                           |
| 245 | The evolution of community-based primary health care, Slovenia                        | 1                                                                | Article            | 1                           |
| 246 | The impact of the COVID-19 pandemic response on other health research                 | 0                                                                | Article            | 8                           |
| 247 | The need for a coordinated international pandemic response                            | 0                                                                | News Item          | 2                           |
| 248 | The pandemic's multisectoral impact                                                   | 0                                                                | News Item          | 0                           |



| No. | Title                                                                                              | COVID-19-related publication = 0<br>non-COVID-19 publication = 1 | Document type      | Number of citations in 2021 |
|-----|----------------------------------------------------------------------------------------------------|------------------------------------------------------------------|--------------------|-----------------------------|
| 249 | The simplified trachoma grading system, amended                                                    | 1                                                                | Article            | 3                           |
| 250 | Time for a causal systems map of physical activity                                                 | 1                                                                | Editorial Material | 1                           |
| 251 | Tobacco package ruling                                                                             | 1                                                                | News Item          | 0                           |
| 252 | Towards a global strategy on digital health                                                        | 1                                                                | Editorial Material | 2                           |
| 253 | Transitions between body mass index categories, South Africa                                       | 1                                                                | Article            | 1                           |
| 254 | Travel restrictions and SARS-CoV-2 transmission: an effective distance approach to estimate impact | 0                                                                | Article            | 8                           |
| 255 | Trends and regional distribution of outpatient claims for asthma, 2009-2016, Germany               | 1                                                                | Article            | 1                           |
| 256 | Tuberculosis concerns                                                                              | 1                                                                | News Item          | 0                           |
| 257 | Tze-Yun Leong: the need for intelligent regulation                                                 | 1                                                                | News Item          | 0                           |
| 258 | Under-five mortality falls                                                                         | 1                                                                | News Item          | 0                           |
| 259 | Under-resourced Ebola response                                                                     | 1                                                                | News Item          | 0                           |
| 260 | United Nations funding for COVID-19 response                                                       | 0                                                                | News Item          | 0                           |
| 261 | Uniting for COVID-19                                                                               | 0                                                                | News Item          | 0                           |
| 262 | Universal health coverage and primary health care: the 30 by 2030 campaign                         | 1                                                                | Editorial Material | 4                           |
| 263 | Universal health coverage provisions for women, children and adolescents                           | 1                                                                | Editorial Material | 0                           |
| 264 | Universal health coverage, oral health, equity and personal responsibility                         | 1                                                                | Editorial Material | 11                          |
| 265 | Universal health coverage: time to deliver on political promises                                   | 1                                                                | Editorial Material | 1                           |
| 266 | Users of rehabilitation services in 14 countries and territories affected by conflict, 1988-2018   | 1                                                                | Article            | 2                           |
| 267 | Using district health information to monitor sustainable development                               | 1                                                                | Editorial Material | 8                           |
| 268 | Vaccination for SARS-CoV-2 of migrants and refugees, Jordan                                        | 0                                                                | Editorial Material | 0                           |
| 269 | Vaccine coverage shrinks                                                                           | 0                                                                | News Item          | 0                           |

| No. | Title                                                                                                                                               | COVID-19-related publication = 0<br>non-COVID-19 publication = 1 | Document type      | Number of citations in 2021 |
|-----|-----------------------------------------------------------------------------------------------------------------------------------------------------|------------------------------------------------------------------|--------------------|-----------------------------|
| 270 | Vaccine solidarity                                                                                                                                  | 0                                                                | News Item          | 0                           |
| 271 | Vaccine-derived poliovirus detected in Sudan                                                                                                        | 1                                                                | News Item          | 0                           |
| 272 | Value-sensitive design and global digital health                                                                                                    | 1                                                                | Editorial Material | 1                           |
| 273 | Variant analysis of SARS-CoV-2 genomes                                                                                                              | 0                                                                | Article            | 165                         |
| 274 | Violence disrupts Ebola response                                                                                                                    | 1                                                                | News Item          | 0                           |
| 275 | Virtual adoptions                                                                                                                                   | 1                                                                | News Item          | 0                           |
| 276 | Wealth-related inequalities in the coverage of reproductive, maternal, newborn and child health interventions in 36 countries in the African Region | 1                                                                | Article            | 3                           |
| 277 | What's next for WHO's global strategy to reduce the harmful use of alcohol?                                                                         | 1                                                                | Editorial Material | 8                           |
| 278 | WHO appoints Regional Directors                                                                                                                     | 1                                                                | News Item          | 0                           |
| 279 | WHO coronavirus timeline                                                                                                                            | 0                                                                | News Item          | 0                           |
| 280 | WHO Foundation created                                                                                                                              | 1                                                                | News Item          | 0                           |
| 281 | WHO names COVID-19 a pandemic                                                                                                                       | 0                                                                | News Item          | 0                           |
| 282 | Wikimedia                                                                                                                                           | 1                                                                | News Item          | 0                           |
| 283 | William Karesh: championing One Health                                                                                                              | 1                                                                | News Item          | 0                           |
| 284 | Women's health                                                                                                                                      | 1                                                                | News Item          | 0                           |
| 285 | World health statistics                                                                                                                             | 1                                                                | News Item          | 0                           |

**Data source:** Web of Science

**Table S4 List of articles published in *Clinical Epidemiology and Global Health* in 2020**

| No. | Title                                                                                                                                                 | COVID-19-related publication = 0<br>non-COVID-19 publication = 1 | Document type | Number of citations in 2021 |
|-----|-------------------------------------------------------------------------------------------------------------------------------------------------------|------------------------------------------------------------------|---------------|-----------------------------|
| 1   | Relationship between age at cochlear implantation and auditory speech perception development skills in children                                       | 1                                                                | Article       | 0                           |
| 2   | Role of umbilical cord arterial pH and lactate in newborn assessment of term antenatal women with hypertensive disorders of pregnancy                 | 1                                                                | Article       | 1                           |
| 3   | Prevalence, pattern, and associated psychosocial factors of headache among undergraduate students of health profession                                | 1                                                                | Article       | 0                           |
| 4   | Role of bacterial agents in newborn babies with septicemia                                                                                            | 1                                                                | Article       | 1                           |
| 5   | Health outcome measures and determinants of using indigenous medicine in a pluralistic healthcare in Nagaland, Northeast India                        | 1                                                                | Article       | 1                           |
| 6   | Prevalence of emotional, behavioural problems and ego resilience among tea tribe adolescents living in Dibrugarh district of Assam                    | 1                                                                | Article       | 1                           |
| 7   | The cytomegalovirus seroprevalence among children in Mostar, Bosnia and Herzegovina: A hospital cross-sectional study                                 | 1                                                                | Article       | 0                           |
| 8   | Occupational health problems of the handloom workers: A cross sectional study of Sualkuchi, Assam, Northeast India                                    | 1                                                                | Article       | 3                           |
| 9   | Stress among the caregivers of mentally disabled children visiting a rehabilitation centre in Chennai, Tamil Nadu - A cross-sectional study           | 1                                                                | Article       | 2                           |
| 10  | Evaluation of variations in morphology and attachment of frenum in diverse population - A cross-sectional study                                       | 1                                                                | Article       | 0                           |
| 11  | How respectfully women are treated during difficult phase like childbirth? A primary survey of differently-managed health facilities in Odisha, India | 1                                                                | Article       | 0                           |
| 12  | Prevalence and distribution of bone defects associated with moderate and severe periodontitis patients                                                | 1                                                                | Article       | 0                           |
| 13  | Understanding the full-immunization gap in districts of India: A geospatial approach                                                                  | 1                                                                | Article       | 4                           |
| 14  | Estimation of prevalence and screening of communication disorders in North and Middle Andaman and Nicobar Islands                                     | 1                                                                | Article       | 0                           |

| No. | Title                                                                                                                                                                                            | COVID-19-related publication = 0<br>non-COVID-19 publication = 1 | Document type | Number of citations in 2021 |
|-----|--------------------------------------------------------------------------------------------------------------------------------------------------------------------------------------------------|------------------------------------------------------------------|---------------|-----------------------------|
| 15  | Estimation of cardiovascular diseases (CVD) risk using WHO/ISH risk prediction charts in tribal population of Chamarajanagar district, Karnataka                                                 | 1                                                                | Article       | 0                           |
| 16  | An exploratory spatial analysis of low birth weight and its determinants in India                                                                                                                | 1                                                                | Article       | 1                           |
| 17  | Do family planning advice and maternal health care utilization changes course in contraception usage? A study based on Bihar, India                                                              | 1                                                                | Article       | 1                           |
| 18  | Epidemiology and clinical features of human cystic echinococcosis in adults from an endemic area (Morocco)                                                                                       | 1                                                                | Article       | 0                           |
| 19  | Documentation compliance of in-patient files: A cross sectional study from an east India state                                                                                                   | 1                                                                | Article       | 5                           |
| 20  | Mobile addiction and its relationship with quality of life in medical students                                                                                                                   | 1                                                                | Article       | 3                           |
| 21  | Methods of estimating the pooled effect size under meta-analysis: A comparative appraisal                                                                                                        | 1                                                                | Article       | 0                           |
| 22  | Sexual violence and poor mental health of women: An exploratory study of Uttar Pradesh, India                                                                                                    | 1                                                                | Article       | 2                           |
| 23  | Impact of socioeconomic and demographic factors for underweight and overweight children in Bangladesh: A polytomous logistic regression model                                                    | 1                                                                | Article       | 2                           |
| 24  | Nutritional status among tribal women in Maharashtra, India: Spatial variations and determinants                                                                                                 | 1                                                                | Article       | 2                           |
| 25  | The impact of sleep duration and sleep quality on glycaemic control in Asian population with type 2 diabetes mellitus: A systematic literature review and meta-analysis of observational studies | 1                                                                | Review        | 3                           |
| 26  | Factors associated with antenatal and health facility delivery care in selected areas of Subornocho upazila, Noakhali, Bangladesh                                                                | 1                                                                | Article       | 3                           |
| 27  | Socio-demographic factors of COPD mortality in India                                                                                                                                             | 1                                                                | Article       | 2                           |
| 28  | Prevalence and pattern of substance use among sandstone mine workers in Rajasthan, India                                                                                                         | 1                                                                | Article       | 1                           |
| 29  | Corticosteroid actions on dengue immune pathology; A review article                                                                                                                              | 1                                                                | Review        | 0                           |
| 30  | Prevalence of substance use and awareness about its ill effects among people residing in a rural village in                                                                                      | 1                                                                | Article       | 0                           |

| No. | Title                                                                                                                                            | COVID-19-related publication = 0<br>non-COVID-19 publication = 1 | Document type | Number of citations in 2021 |
|-----|--------------------------------------------------------------------------------------------------------------------------------------------------|------------------------------------------------------------------|---------------|-----------------------------|
|     | Chamarajanagara district, Karnataka                                                                                                              |                                                                  |               |                             |
| 31  | Antibiotics: Need for new fences, a prospective utilization evaluation of cephalosporin's and its combination in tertiary care referral hospital | 1                                                                | Article       | 0                           |
| 32  | Noninvasive biomarkers predict improvement in liver fibrosis after successful generic DAAs based therapy of chronic hepatitis C in Egypt         | 1                                                                | Article       | 2                           |
| 33  | Effect of triage nurse-led application of the ottawa ankle rules on pain and patient satisfaction with emergency department care                 | 1                                                                | Article       | 0                           |
| 34  | The effect of foot massage in lowering intradialytic blood pressure at Hemodialysis Unit in Indonesian Hospital                                  | 1                                                                | Article       | 0                           |
| 35  | Age at first marriage and fertility in developing countries: A meta analytical view of 15 Demographic and Health Surveys                         | 1                                                                | Article       | 0                           |
| 36  | Does fear for infection affect condom use and HIV testing? A study of female sex workers in Pune city                                            | 1                                                                | Article       | 0                           |
| 37  | 3D printed tissue and organ using additive manufacturing: An overview                                                                            | 1                                                                | Article       | 10                          |
| 38  | Distress tolerance in methamphetamine and opium abusers with non-drug abuser (A comparative analysis)                                            | 1                                                                | Article       | 1                           |
| 39  | Gender disparities in the burden of non-communicable diseases in India: Evidence from the cross-sectional study                                  | 1                                                                | Article       | 1                           |
| 40  | Association between consanguineous marriage and child nutritional outcomes among currently married women in Pakistan                             | 1                                                                | Article       | 2                           |
| 41  | Prevalence of communication disorders in Port Blair-Andaman and Nicobar Islands                                                                  | 1                                                                | Article       | 0                           |
| 42  | Imaging and future perspectives for diagnosis of complex diseases                                                                                | 1                                                                | Review        | 1                           |
| 43  | Hospital admission of exposure to air pollution in Ahvaz megacity during 2010-2013                                                               | 1                                                                | Article       | 2                           |
| 44  | Lesion analysis towards melanoma detection using soft computing techniques                                                                       | 1                                                                | Article       | 0                           |
| 45  | Gender preference among post-natal women for the next child: A study from coastal south India                                                    | 1                                                                | Article       | 0                           |

| No. | Title                                                                                                                                                                           | COVID-19-related publication = 0<br>non-COVID-19 publication = 1 | Document type | Number of citations in 2021 |
|-----|---------------------------------------------------------------------------------------------------------------------------------------------------------------------------------|------------------------------------------------------------------|---------------|-----------------------------|
| 46  | Epidemiology of generalized ligamentous laxity in northwest of Iran: A pilot national study on 17-40 years old adults in Hamadan province                                       | 1                                                                | Article       | 0                           |
| 47  | Combined profiles derived from cardiovascular risk factors, health-promoting lifestyle, and post-traumatic stress disorder symptoms                                             | 1                                                                | Article       | 0                           |
| 48  | Determining factors of institutional delivery in India: A study from National Family Health Survey-4 (2015-16)                                                                  | 1                                                                | Article       | 2                           |
| 49  | 3D printing applications for the treatment of cancer                                                                                                                            | 1                                                                | Article       | 7                           |
| 50  | Impact of pharmaceutical care programme on health outcome of geriatric patients                                                                                                 | 1                                                                | Article       | 0                           |
| 51  | Absolute eosinophil count as a diagnostic and prognostic marker compared to C- reactive protein and Procalcitonin in patients with sepsis                                       | 1                                                                | Article       | 1                           |
| 52  | Assessment of malnutrition and its underlying causes among vulnerable populations dwelling in the urban slums of Nongstoin Town, Meghalaya                                      | 1                                                                | Article       | 0                           |
| 53  | Trends in the use of Yoga and Naturopathy based lifestyle clinics for the management of Non-communicable diseases (NCDs) in Tamilnadu, South India                              | 1                                                                | Article       | 4                           |
| 54  | Existing practices of intravenous (IV) medication management and barriers for safe practices among healthcare professionals in a selected hospital of Udupi district, Karnataka | 1                                                                | Article       | 0                           |
| 55  | Tobacco use among health care workers of tertiary care center of Faridabad, Haryana, India                                                                                      | 1                                                                | Article       | 2                           |
| 56  | Prevalence and pattern of multimorbidity among adults in a primary care rural setting                                                                                           | 1                                                                | Article       | 3                           |
| 57  | The quality of age data: Comparison between two recent Indian censuses 2001-2011                                                                                                | 1                                                                | Article       | 1                           |
| 58  | Epidemiological survey of chronic diseases on manufacturing employees (ESCOME): Design and methodology of a large cross-sectional study                                         | 1                                                                | Article       | 1                           |
| 59  | Saudi myocardial infarction patients' learning needs: Implications for cardiac education program                                                                                | 1                                                                | Article       | 2                           |

| No. | Title                                                                                                                                                                                                                   | COVID-19-related publication = 0<br>non-COVID-19 publication = 1 | Document type      | Number of citations in 2021 |
|-----|-------------------------------------------------------------------------------------------------------------------------------------------------------------------------------------------------------------------------|------------------------------------------------------------------|--------------------|-----------------------------|
| 60  | Prevalence and pattern of contraceptive use and unmet need among women of reproductive age in urban Mysuru                                                                                                              | 1                                                                | Article            | 1                           |
| 61  | Effectiveness of educational intervention on breastfeeding among primi pregnant women- a longitudinal study                                                                                                             | 1                                                                | Article            | 1                           |
| 62  | Factors associated with tobacco use among Nepalese men aged 15-49 years: Data from Nepal demographic and Health Survey 2016                                                                                             | 1                                                                | Article            | 2                           |
| 63  | Prevalence and risk factors of anemia among children 6-59 months in India: A multilevel analysis                                                                                                                        | 1                                                                | Article            | 4                           |
| 64  | Influencing variables for fetal growth in malnourished mothers: A nested case-control study                                                                                                                             | 1                                                                | Article            | 0                           |
| 65  | Penetration and coverage of government-funded health insurance schemes in India                                                                                                                                         | 1                                                                | Article            | 0                           |
| 66  | Are our teachers knowledgeable towards pre hospital emergency care: A study from South India                                                                                                                            | 1                                                                | Article            | 0                           |
| 67  | Confined vulnerability of HIV infection among pregnant women attending antenatal care clinics in Karnataka, India: Analysis of data from the HIV sentinel surveillance 2017                                             | 1                                                                | Article            | 0                           |
| 68  | The relationship between warm and cold temperament and dysmenorrhea                                                                                                                                                     | 1                                                                | Article            | 1                           |
| 69  | RAPTS - An empowerment to the medical postgraduates                                                                                                                                                                     | 1                                                                | Editorial Material | 1                           |
| 70  | Serum low replacement medium versus serum rich replacement medium for production of Anti-Schistosoma Monoclonal antibody: A comparative study                                                                           | 1                                                                | Article            | 0                           |
| 71  | Predictors of length of stay in the coronary care unit in patient with acute coronary syndrome based on data mining methods                                                                                             | 1                                                                | Article            | 3                           |
| 72  | Outcome of preterm neonates born to women of a developing country at risk of preterm birth exposed to varying doses of antenatal corticosteroid: A prospective observational study                                      | 1                                                                | Article            | 0                           |
| 73  | Child-rearing practices among migrant mothers of South India: A mixed method study                                                                                                                                      | 1                                                                | Article            | 0                           |
| 74  | Comparison of pain perception during the administration of local anaesthesia with computerized delivery system (WAND) and conventional technique in pediatric dental procedure using Visual Analogue scale-A randomised | 1                                                                | Article            | 1                           |

| No. | Title                                                                                                                                                                                                                                                | COVID-19-related publication = 0<br>non-COVID-19 publication = 1 | Document type | Number of citations in 2021 |
|-----|------------------------------------------------------------------------------------------------------------------------------------------------------------------------------------------------------------------------------------------------------|------------------------------------------------------------------|---------------|-----------------------------|
|     | controlled trial                                                                                                                                                                                                                                     |                                                                  |               |                             |
| 75  | Validity of self-reported diabetes varies with sociodemographic characteristics: Example from Iran                                                                                                                                                   | 1                                                                | Article       | 1                           |
| 76  | The uses of gold nanoparticles and <i>Citrullus colocynthis</i> L. nanoparticles against <i>Giardia lamblia</i> in vivo                                                                                                                              | 1                                                                | Article       | 2                           |
| 77  | Assessment of role of Integrated Counselling and Testing Centre in addressing HIV/AIDS stigma                                                                                                                                                        | 1                                                                | Article       | 0                           |
| 78  | Prevalence and determinants of the use of caesarean section (CS) in the dichotomy of 'public' and 'private' health facilities in West Bengal, India                                                                                                  | 1                                                                | Article       | 2                           |
| 79  | 3D printing applications towards the required challenge of stem cells printing                                                                                                                                                                       | 1                                                                | Article       | 6                           |
| 80  | Study of relationship between nitrogen dioxide and chronic obstructive pulmonary disease in Bushehr, Iran                                                                                                                                            | 1                                                                | Article       | 4                           |
| 81  | Building knowledge and evidence base on antimicrobial resistance in Africa, through 'One Health' based surveillance                                                                                                                                  | 1                                                                | Article       | 3                           |
| 82  | Association between serum uric acid and proteinuria in patients with type 2 diabetes and stages 1 and 2 chronic kidney disease                                                                                                                       | 1                                                                | Article       | 0                           |
| 83  | Prevalence of chest symptoms of tuberculosis among diabetes patients in Udupi taluk                                                                                                                                                                  | 1                                                                | Article       | 0                           |
| 84  | The survival rate of patients with ST-Segment elevation myocardial infarction treated with primary percutaneous coronary intervention and thrombolysis                                                                                               | 1                                                                | Article       | 0                           |
| 85  | Airway function and mental health status of petrol pump workers of Aurangabad (Maharashtra) city. - An analytical cross-sectional study                                                                                                              | 1                                                                | Article       | 0                           |
| 86  | The socioeconomic correlates of substance use among male adults in Northeast India                                                                                                                                                                   | 1                                                                | Article       | 8                           |
| 87  | Birth interval and childhood undernutrition: Evidence from a large scale survey in India                                                                                                                                                             | 1                                                                | Article       | 2                           |
| 88  | Out-of-pocket expenditure for delivery at home and public health facilities in the context of conditional cash transfer and free delivery care programs: An analytical cross-sectional study in South 24 Parganas district, West Bengal, India, 2017 | 1                                                                | Article       | 1                           |



| No. | Title                                                                                                                                                                                                      | COVID-19-related publication = 0<br>non-COVID-19 publication = 1 | Document type | Number of citations in 2021 |
|-----|------------------------------------------------------------------------------------------------------------------------------------------------------------------------------------------------------------|------------------------------------------------------------------|---------------|-----------------------------|
| 89  | Effect of aerobic exercises on depressive symptoms, anxiety, self-esteem, and quality of life among adults with depression                                                                                 | 1                                                                | Article       | 1                           |
| 90  | Contraceptives utilization and barriers in Karnataka, Southern India: A survey on women residing in slums                                                                                                  | 1                                                                | Article       | 0                           |
| 91  | Tuberculosis, human immunodeficiency viruses and TB/HIV co-infection in pregnant women: A meta-analysis                                                                                                    | 1                                                                | Article       | 1                           |
| 92  | Epidemiologic survey of extra-pulmonary tuberculosis in Ahvaz from 2008 to 2013                                                                                                                            | 1                                                                | Article       | 0                           |
| 93  | Dimensions of quality of life in the different stages of chronic kidney disease patients - A cross-sectional study                                                                                         | 1                                                                | Article       | 0                           |
| 94  | Determinants of stunting among under-five years children in Ethiopia from the 2016 Ethiopia demographic and Health Survey: Application of ordinal logistic regression model using complex sampling designs | 1                                                                | Article       | 5                           |
| 95  | Prevalence and determinants of voluntary caesarean deliveries and socioeconomic inequalities in India: Evidence from National Family Health Survey (2015-16)                                               | 1                                                                | Article       | 3                           |
| 96  | Exploring the spatial patterns of cesarean section delivery in India: Evidence from National Family Health Survey-4                                                                                        | 1                                                                | Article       | 5                           |
| 97  | Determination of association between the polymorphism in exon 3 of dopamine receptor gene type 4 with attention deficit-hyperactivity disorder                                                             | 1                                                                | Article       | 0                           |
| 98  | Reproductive, Maternal, Newborn, Child and Adolescent Health and related Behaviour Change Communication strategies in Bangladesh, Nepal and India: A narrative review                                      | 1                                                                | Review        | 2                           |
| 99  | Socio-economic inequality and spatial heterogeneity in anaemia among children in India: Evidence from NFHS-4 (2015-16)                                                                                     | 1                                                                | Article       | 10                          |
| 100 | Oncology nurses' knowledge about exploring chemotherapy related - Extravasation care: A cross-sectional study                                                                                              | 1                                                                | Article       | 1                           |
| 101 | Insights into the perceptions of health care providers towards clinical pharmacy services for advanced pharmaceutical care                                                                                 | 1                                                                | Article       | 0                           |
| 102 | Cardiovascular diseases and health care expenditure (HCE) of inpatient and outpatient: A study from India Human Development Survey                                                                         | 1                                                                | Article       | 0                           |

| No. | Title                                                                                                                                                         | COVID-19-related publication = 0<br>non-COVID-19 publication = 1 | Document type | Number of citations in 2021 |
|-----|---------------------------------------------------------------------------------------------------------------------------------------------------------------|------------------------------------------------------------------|---------------|-----------------------------|
| 103 | Association of leptin receptor genetic variants (LEPR) with obesity and leptin level in unexplained infertility in northern Indian population                 | 1                                                                | Article       | 0                           |
| 104 | Comparison of the prevalence of <i>Toxocara</i> spp. eggs in public parks soils in different seasons, from 2017 to 2018, Tehran Province, Iran                | 1                                                                | Article       | 2                           |
| 105 | Seroepidemiology and risk factors of toxoplasmosis among children age ranged from 1 to 14 years referred to medical diagnostic laboratories in Southeast Iran | 1                                                                | Article       | 2                           |
| 106 | Analysis of determinants of severity levels of childhood anemia in Bangladesh using a proportional odds model                                                 | 1                                                                | Article       | 2                           |
| 107 | Changes in levels of morbidity and hospitalisation in Kerala: A district level analysis (1995-2014)                                                           | 1                                                                | Article       | 0                           |
| 108 | Evaluation of knowledge, attitude and practice of healthcare providers towards life-threatening drug-drug interactions in Penang General Hospital, Malaysia   | 1                                                                | Article       | 2                           |
| 109 | Triggering factors associated with the utilization of antenatal care visits in Bangladesh: An application of negative binomial regression model               | 1                                                                | Article       | 1                           |
| 110 | Crucial predicting factors of under-five mortality in Sierra Leone                                                                                            | 1                                                                | Article       | 1                           |
| 111 | Acute rheumatic fever in children: Experience at the hospital Hassan II of Fez, Morocco                                                                       | 1                                                                | Article       | 1                           |
| 112 | Cancer incidence and mortality in Poland                                                                                                                      | 1                                                                | Review        | 5                           |
| 113 | Mobile SMS: A tool for management of diabetes via patients-relative's knowledge and belief                                                                    | 1                                                                | Article       | 0                           |
| 114 | Prevalence and causes of communication disorders-A retrospective study from northern Karnataka                                                                | 1                                                                | Article       | 2                           |
| 115 | Risk behaviours related to hepatitis B virus infection among adults in Malaysia: A cross-sectional household survey                                           | 1                                                                | Article       | 1                           |
| 116 | Malnutrition among elderly a multifactorial condition to flourish: Evidence from a cross-sectional study                                                      | 1                                                                | Article       | 2                           |
| 117 | The latency period between type 2 diabetes and development of Coronary Artery Disease based on psychological factors                                          | 1                                                                | Article       | 0                           |

| No. | Title                                                                                                                                                                                      | COVID-19-related publication = 0<br>non-COVID-19 publication = 1 | Document type | Number of citations in 2021 |
|-----|--------------------------------------------------------------------------------------------------------------------------------------------------------------------------------------------|------------------------------------------------------------------|---------------|-----------------------------|
| 118 | Clustering the envenoming of snakebite in India: The district level analysis using Health Management Information System data                                                               | 1                                                                | Article       | 3                           |
| 119 | Comparing the frequency of osteoporosis and osteopenia in chronic hepatitis B patients with and without Tenofovir treatment                                                                | 1                                                                | Article       | 0                           |
| 120 | Bayesian competing risks analysis without data stratification                                                                                                                              | 1                                                                | Article       | 0                           |
| 121 | Diagnostic performance of dry eye tests, serology and labial salivary gland biopsy in primary Sjogren's syndrome in an Indian setting                                                      | 1                                                                | Article       | 0                           |
| 122 | Infected food handlers led to an outbreak of hepatitis A in Ernakulam district, Kerala, Southern India, 2016                                                                               | 1                                                                | Article       | 1                           |
| 123 | Comparative role of various methods of estimating between study variance for meta-analysis using random effect method                                                                      | 1                                                                | Article       | 1                           |
| 124 | Classification of various types of disability and determining their predictive causes in western Iran                                                                                      | 1                                                                | Article       | 0                           |
| 125 | Public health preventive action to start from the fourth decade of life?                                                                                                                   | 1                                                                | Article       | 0                           |
| 126 | Public practices towards antibiotics: A qualitative study                                                                                                                                  | 1                                                                | Article       | 1                           |
| 127 | Risk factors for gestational diabetes mellitus: A prospective case-control study from coastal Karnataka                                                                                    | 1                                                                | Article       | 0                           |
| 128 | Frequency of methicillin-resistant Staphylococcus aureus (MRSA) in nose and cellular phone of medical and non-medical personnel of emergency departments of Ghaem hospital in Mashhad city | 1                                                                | Article       | 2                           |
| 129 | Awareness about cervical cancer among women residing in urban slums of Mysuru city of Karnataka, India: A cross-sectional study                                                            | 1                                                                | Article       | 0                           |
| 130 | A study on knowledge and self-care practices about Diabetes Mellitus among patients with type 2 Diabetes Mellitus attending selected tertiary healthcare facilities in coastal Karnataka   | 1                                                                | Article       | 2                           |
| 131 | The effect of an educational intervention based on the Integrated Behavior Model (IBM) on the waste separation: A community based study                                                    | 1                                                                | Article       | 2                           |

| No. | Title                                                                                                                                                           | COVID-19-related publication = 0<br>non-COVID-19 publication = 1 | Document type | Number of citations in 2021 |
|-----|-----------------------------------------------------------------------------------------------------------------------------------------------------------------|------------------------------------------------------------------|---------------|-----------------------------|
| 132 | Tobacco use patterns and tobacco-related awareness in medical students of Delhi                                                                                 | 1                                                                | Article       | 1                           |
| 133 | Physicians' willingness to be vaccinated with a smallpox vaccine to prevent monkeypox viral infection: A cross-sectional study in Indonesia                     | 1                                                                | Article       | 0                           |
| 134 | Estimating 10-year cardiovascular disease risk in urban and rural populations in Haiti                                                                          | 1                                                                | Article       | 0                           |
| 135 | Scrub typhus: A serious public health issue in Nepal                                                                                                            | 1                                                                | Letter        | 3                           |
| 136 | Sociodemographics, clinical profile and health promotion behaviour of people with type 2 diabetes mellitus                                                      | 1                                                                | Article       | 0                           |
| 137 | Long-term exposure to ambient PM2.5 and impacts on health in Rome, Italy                                                                                        | 1                                                                | Article       | 9                           |
| 138 | General population's eagerness and knowledge regarding basic life support: A community based study in Jakarta, Indonesia                                        | 1                                                                | Article       | 1                           |
| 139 | Role of HRCT imaging in predicting the visibility of Round window (RW) on patients underwent cochlear implant surgery                                           | 1                                                                | Article       | 4                           |
| 140 | Survey of awareness about the risk factors of low back pain among operating room personnel of Shiraz hospitals: A cross-sectional study                         | 1                                                                | Article       | 0                           |
| 141 | Estimation of lung and bronchial cancer registry completeness via capture-recapture method using population-based cancer registry in Khuzestan province in 2011 | 1                                                                | Article       | 1                           |
| 142 | The frequency of major complications among fasting people with diabetes according to risk categories of IDF-DAR guidelines 2016                                 | 1                                                                | Article       | 0                           |
| 143 | Quantitative determination of pupil by dynamic pupillometry using infrared videography - Role in evaluation of autonomic activity                               | 1                                                                | Article       | 2                           |
| 144 | Virtual reality applications toward medical field                                                                                                               | 1                                                                | Article       | 18                          |
| 145 | Role of HFE gene in coronary artery disease - A study from India                                                                                                | 1                                                                | Article       | 1                           |

| No. | Title                                                                                                                                            | COVID-19-related publication = 0<br>non-COVID-19 publication = 1 | Document type | Number of citations in 2021 |
|-----|--------------------------------------------------------------------------------------------------------------------------------------------------|------------------------------------------------------------------|---------------|-----------------------------|
| 146 | Incidence of obesity, adiposity and physical activity pattern as risk factor in adults of Delhi, India                                           | 1                                                                | Article       | 0                           |
| 147 | Comparison of detecting Legionella Pneumophilla with urinary antigen test in teaching hospitals                                                  | 1                                                                | Article       | 0                           |
| 148 | Metabolic syndrome risk assessment among adults in Udupi District, Karnataka                                                                     | 1                                                                | Article       | 1                           |
| 149 | Surgical site dressing practice                                                                                                                  | 1                                                                | Article       | 0                           |
| 150 | An impact of reduction in point prevalence of tobacco use on cancer incidence- A challenge for global policy makers                              | 1                                                                | Article       | 0                           |
| 151 | A report of antibiotic restriction policy in Ghaem university hospital, Mashhad, Northea                                                         | 1                                                                | Article       | 0                           |
| 152 | The epidemiological profile of metabolic syndrome in Indian population: A comparative study between men and women                                | 1                                                                | Article       | 2                           |
| 153 | Association of diet and lipid profile among coronary heart disease patients                                                                      | 1                                                                | Article       | 0                           |
| 154 | Chronic headache in tabari cohort population: Prevalence and its related risk factors                                                            | 1                                                                | Article       | 2                           |
| 155 | Mass drug administration programme against lymphatic filariasis-an evaluation of coverage and compliance in a northern Karnataka district, India | 1                                                                | Article       | 0                           |
| 156 | Impact of clinical pharmacist managed patient counselling on the knowledge and adherence to antiepileptic drug therapy                           | 1                                                                | Article       | 1                           |
| 157 | A study on implementation of 'Kuposhan Mukt Gujarat Maha-Abhiyan' (KMGA) in Vadodara district, Gujarat                                           | 1                                                                | Article       | 0                           |
| 158 | The global prevalence of musculoskeletal disorders among operating room personnel: A systematic review and meta-analysis                         | 1                                                                | Review        | 5                           |
| 159 | The prevalence of nosocomial infection rates and needle sticks injuries at a teaching hospital, during 2013-2014                                 | 1                                                                | Article       | 0                           |
| 160 | Screening of refractive error among primary school students at Tanta City Gharbia governorate Egypt. How serious is the problem?                 | 1                                                                | Article       | 0                           |
| 161 | Epidemiological investigation of chikungunya outbreak, West Kalimantan, Indonesia                                                                | 1                                                                | Article       | 0                           |

| No. | Title                                                                                                                                                    | COVID-19-related publication = 0<br>non-COVID-19 publication = 1 | Document type | Number of citations in 2021 |
|-----|----------------------------------------------------------------------------------------------------------------------------------------------------------|------------------------------------------------------------------|---------------|-----------------------------|
| 162 | Testing a diabetes ketoacidosis simulation in critical care nursing: A randomized control trial                                                          | 1                                                                | Article       | 1                           |
| 163 | Gender differential and regional disparity of disability-free life-expectancy among disable in India                                                     | 1                                                                | Article       | 2                           |
| 164 | A study on clinical epidemiology of filarial lymphedema patients attending filariasis clinic in Pondicherry                                              | 1                                                                | Article       | 0                           |
| 165 | Readmissions and clinical outcomes in heart failure patients: A retrospective study                                                                      | 1                                                                | Article       | 2                           |
| 166 | Prevalence of HPV infection in reproductive aged female in Delhi NCR region                                                                              | 1                                                                | Article       | 1                           |
| 167 | Allergen profile of rhinitis and asthma among Iraqi patients                                                                                             | 1                                                                | Article       | 1                           |
| 168 | Decomposition of Socioeconomic Inequality in Catastrophic Health Expenditure: An Evidence from Iran                                                      | 1                                                                | Article       | 5                           |
| 169 | Prevalence and risk factors of intestinal parasite infections in Mazandaran province, North of Iran                                                      | 1                                                                | Article       | 3                           |
| 170 | Vitamin D gene polymorphisms and risk of acute cardiovascular events                                                                                     | 1                                                                | Article       | 3                           |
| 171 | The prevalence, epidemiology and screening results of breast cancer in women of Guilan province, north of Iran: A cross-sectional study during 2017-2018 | 1                                                                | Article       | 2                           |
| 172 | Prevalence and risk factors of female genital mutilation in Egypt: a systematic review                                                                   | 1                                                                | Review        | 1                           |
| 173 | A multi stage EEG data classification using k-means and feed forward neural network                                                                      | 1                                                                | Article       | 1                           |
| 174 | Risk factors associated with asthma among adults in Khuzestan, southwest Iran                                                                            | 1                                                                | Article       | 2                           |
| 175 | Gender differential in health care utilisation in India                                                                                                  | 1                                                                | Article       | 5                           |
| 176 | Anesthetic toxic isoflurane and health risk assessment in the operation room in Abadan, Iran during 2018                                                 | 1                                                                | Article       | 1                           |
| 177 | Evaluation of breastfeeding patterns in the first 24 h of life and associated factors in south of Iran: A cross-sectional study                          | 1                                                                | Article       | 0                           |
| 178 | Seroprevalence of Cystic Echinococcosis and related risk factors for infection among children in a rural community in Fars Province, Southern Iran       | 1                                                                | Article       | 3                           |
| 179 | Removal notice to validation of the Hamilton anxiety rating scale and state trait anxiety inventory a and b in Arabic                                    | 1                                                                | Correction    | 0                           |

| No. | Title                                                                                                                                                                         | COVID-19-related publication = 0<br>non-COVID-19 publication = 1 | Document type | Number of citations in 2021 |
|-----|-------------------------------------------------------------------------------------------------------------------------------------------------------------------------------|------------------------------------------------------------------|---------------|-----------------------------|
|     | among the Lebanese population (vol 7, pg 464, 2019)                                                                                                                           |                                                                  |               |                             |
| 180 | Status of iodine in rural pregnant women of different trimesters in Lucknow-A cross-sectional study                                                                           | 1                                                                | Article       | 1                           |
| 181 | Assessment and projection of burden of cancer due to tobacco in India till 2025                                                                                               | 1                                                                | Article       | 0                           |
| 182 | Sex composition and son preference in India and major states: Evidence from the National Family Health Survey-4 (2015-16)                                                     | 1                                                                | Article       | 1                           |
| 183 | Sensation seeking and peer passenger influence on risky driving among novice drivers in Udupi Taluk, India                                                                    | 1                                                                | Article       | 0                           |
| 184 | Does the salivary fern pattern determine fertile period in reproductive female?                                                                                               | 1                                                                | Article       | 2                           |
| 185 | An 8-year study on the prevalence and drug resistance of mycobacteria in clinical specimens (2011-2018)                                                                       | 1                                                                | Article       | 2                           |
| 186 | Relationship between socio-demographic, clinical factors, and quality of life in adults living with diabetic nephropathy                                                      | 1                                                                | Article       | 4                           |
| 187 | Factors associated with preventive behaviors, anxiety among healthcare workers and response preparedness against COVID-19 outbreak: A one health approach                     | 0                                                                | Article       | 1                           |
| 188 | Association between diet quality scores, adiposity, glycemic status and nutritional biomarkers among Indian population with type 2 diabetes mellitus: A cross-sectional study | 1                                                                | Article       | 0                           |
| 189 | 3D printed medical parts with different materials using additive manufacturing                                                                                                | 1                                                                | Article       | 12                          |
| 190 | Willingness-to-pay for improvement of hypothetical health status in patients visiting the emergency department: A contingent valuation study                                  | 1                                                                | Article       | 1                           |
| 191 | Risk factors of infant mortality in Bangladesh                                                                                                                                | 1                                                                | Article       | 6                           |
| 192 | Analysis of high dimensional brain data using prototype based fuzzy clustering                                                                                                | 1                                                                | Article       | 0                           |
| 193 | Epidemiology and phylogenetic analysis of respiratory viruses from 2012 to 2015 - A sentinel surveillance report from union territory of Puducherry, India                    | 1                                                                | Article       | 1                           |

| No. | Title                                                                                                                                                                                                          | COVID-19-related publication = 0<br>non-COVID-19 publication = 1 | Document type | Number of citations in 2021 |
|-----|----------------------------------------------------------------------------------------------------------------------------------------------------------------------------------------------------------------|------------------------------------------------------------------|---------------|-----------------------------|
| 194 | Evaluation of antihypertensive prescriptions for rationality and adherence to treatment guidelines: An experience from United Arab Emirates                                                                    | 1                                                                | Article       | 0                           |
| 195 | Prevalence and subtype identification of Blastocystis isolated from human in Shiraz city, southern Iran                                                                                                        | 1                                                                | Article       | 2                           |
| 196 | Epidemiological study on pediatric unilateral cochlear implantation in Gujarat, India: Discrepancy among children based on age of implantation, gender, region and type of implant device as per manufacturers | 1                                                                | Article       | 0                           |
| 197 | Detection of Toxoplasma gondii infection among diabetic patients in Turkey                                                                                                                                     | 1                                                                | Article       | 0                           |
| 198 | Socio-demographic factors influencing utilization of maternal health care services in India                                                                                                                    | 1                                                                | Article       | 7                           |
| 199 | Prevalence of oral diseases among school children of Mysuru and Chamarajanagar districts, Karnataka, India                                                                                                     | 1                                                                | Article       | 1                           |
| 200 | Economic burden of unused medicines and its causes in households of Perinthalmanna region                                                                                                                      | 1                                                                | Article       | 0                           |
| 201 | Seroprevalence of toxocarasis and its related risk factors among municipal street sweepers in Shiraz District in Fars Province, southern Iran                                                                  | 1                                                                | Article       | 0                           |
| 202 | Understanding the three As (Awareness, Access, and Acceptability) dimensions of vaccine hesitancy in Odisha, India                                                                                             | 1                                                                | Article       | 3                           |
| 203 | Proposed reforms in medical education in India: Perspective of undergraduate students                                                                                                                          | 1                                                                | Article       | 0                           |
| 204 | Tribal eligible couple and care providers' perspective on family planning: A qualitative study in Keonjhar district, Odisha, India                                                                             | 1                                                                | Article       | 0                           |
| 205 | Epidemiology of nosocomial infection in Abadan, Southwest Iran                                                                                                                                                 | 1                                                                | Article       | 0                           |
| 206 | Impact of cigarettes' filter length and diameter on cigarette smoke emissions                                                                                                                                  | 1                                                                | Article       | 2                           |
| 207 | Knowledge and awareness regarding HPV infection and PAP smear screening in reproductive aged females of rural India                                                                                            | 1                                                                | Article       | 0                           |
| 208 | Secondhand tobacco smoke exposure of infants at home: A population based cross-sectional study                                                                                                                 | 1                                                                | Article       | 0                           |
| 209 | Factors influencing exclusive breastfeeding (EBF) in Empowered Action Group (EAG) states and Assam                                                                                                             | 1                                                                | Article       | 1                           |



| No. | Title                                                                                                                                                     | COVID-19-related publication = 0<br>non-COVID-19 publication = 1 | Document type | Number of citations in 2021 |
|-----|-----------------------------------------------------------------------------------------------------------------------------------------------------------|------------------------------------------------------------------|---------------|-----------------------------|
| 210 | Mental consequences and behavioral health 18 month after outpatient cardiac rehabilitation in three separated profiles at baseline                        | 1                                                                | Article       | 0                           |
| 211 | Investigating the prevalence of child abuse in the families with addicted parents in Iran: With emphasis on family risk factors                           | 1                                                                | Article       | 1                           |
| 212 | Validation of the Hamilton Anxiety Rating Scale and State Trait Anxiety Inventory A and B in Arabic among the Lebanese population                         | 1                                                                | Article       | 11                          |
| 213 | Association between serum micronutrient levels and febrile seizures among febrile children in Southern India: A case control study                        | 1                                                                | Article       | 0                           |
| 214 | Self-medication practices with antibiotics among nursing students: A cross-sectional descriptive survey at tertiary care teaching hospital in Uttarakhand | 1                                                                | Article       | 0                           |
| 215 | A relationship between maternal periodontal disease and preterm low birth weight: A cross-sectional study                                                 | 1                                                                | Article       | 0                           |
| 216 | Mental health status of Farmers in Maharashtra, India: A study from farmer suicide prone area of Vidarbha region                                          | 1                                                                | Article       | 0                           |
| 217 | Daytime sleepiness among Omani Nursing Students: Estimate of its determinants and impact on perceived stress                                              | 1                                                                | Article       | 2                           |
| 218 | Prevalence of metabolic syndrome and its components among a population-based study in south of Iran, PERSIAN Kharameh cohort study                        | 1                                                                | Article       | 7                           |
| 219 | The relationship between nurse self-efficacy and the culture of patient safety incident reporting in a district general hospital, Indonesia               | 1                                                                | Article       | 3                           |
| 220 | The game is not over for polio virus in India; it can strike back again                                                                                   | 1                                                                | Letter        | 0                           |
| 221 | Seroprevalence of toxocarasis in multiple sclerosis and rheumatoid arthritis patients in Shiraz city, southern Iran                                       | 1                                                                | Article       | 1                           |
| 222 | Concise title: Maternal health service utilization                                                                                                        | 1                                                                | Article       | 0                           |
| 223 | Discriminating malaria and dengue fever in endemic areas: Clinical, biochemical and radiological criteria                                                 | 1                                                                | Article       | 0                           |

| No. | Title                                                                                                                                                      | COVID-19-related publication = 0<br>non-COVID-19 publication = 1 | Document type | Number of citations in 2021 |
|-----|------------------------------------------------------------------------------------------------------------------------------------------------------------|------------------------------------------------------------------|---------------|-----------------------------|
| 224 | Evaluation of the geriatric patients prescription for inappropriate medications frequency at Larkana Sindh Hospital in Pakistan                            | 1                                                                | Article       | 1                           |
| 225 | Climacteric symptoms among women residing in a rural area of Kerala state - A cross-sectional study                                                        | 1                                                                | Article       | 1                           |
| 226 | Spatial clustering of diabetes among reproductive age women and its spatial determinants at the district level in southern India                           | 1                                                                | Article       | 2                           |
| 227 | Prevalence and antimicrobial sensitivity pattern of bacteria causing urinary tract infection; study of a tertiary care hospital in North India             | 1                                                                | Article       | 2                           |
| 228 | Evidences on overweight of regular blood donors in a center of Southern Italy                                                                              | 1                                                                | Article       | 0                           |
| 229 | Perception about migration among Oraon Tribes in India                                                                                                     | 1                                                                | Article       | 1                           |
| 230 | The factors affecting the obstetricians-gynecologists workforce planning: A systematic review                                                              | 1                                                                | Review        | 0                           |
| 231 | Estimated incubation period for mosquito-borne disease-related Guillain-Barre syndrome                                                                     | 1                                                                | Article       | 1                           |
| 232 | Seroprevalence of hepatitis B, hepatitis C and HIV 1/y2 in patients undergoing surgery in a tertiary care hospital in north India (a hospital based study) | 1                                                                | Article       | 0                           |
| 233 | Civil registration system (CRS) for birth and death registration in Assam - A rapid assessment                                                             | 1                                                                | Article       | 0                           |
| 234 | Awareness of various aspects of diabetes among people visiting tertiary eye care institute in north India                                                  | 1                                                                | Article       | 0                           |
| 235 | Role of vitamin a in child health and nutrition                                                                                                            | 1                                                                | Review        | 4                           |
| 236 | Spatio-temporal pattern of malignant neoplasm of brain in Fars province I.R.Iran (2011-2015): A population-based cross sectional study                     | 1                                                                | Article       | 0                           |
| 237 | Factors influencing adherence to anti-diabetes medications among type 2 diabetes patients attending tertiary care hospitals in Mangaluru                   | 1                                                                | Article       | 4                           |
| 238 | Catastrophic health expenditure and health facility access among rural informal sector families                                                            | 1                                                                | Article       | 0                           |

| No. | Title                                                                                                                                                                                                                           | COVID-19-related publication = 0<br>non-COVID-19 publication = 1 | Document type | Number of citations in 2021 |
|-----|---------------------------------------------------------------------------------------------------------------------------------------------------------------------------------------------------------------------------------|------------------------------------------------------------------|---------------|-----------------------------|
| 239 | Seroprevalence and associated risk factors of <i>Toxoplasma gondii</i> infection in a representative Australian human population: The Busselton health study                                                                    | 1                                                                | Article       | 0                           |
| 240 | Clinical management and outcome assessment of generalized anxiety disorder or panic disorder in refractory gastro-esophageal reflux disease: Evidence from a prospective interventional study of benzodiazepines and sertraline | 1                                                                | Article       | 0                           |
| 241 | Effect of fenugreek on breast milk production and weight gain among Infants in the first week of life                                                                                                                           | 1                                                                | Article       | 1                           |
| 242 | Quality of services provided by public funded ambulance program: Experience from a northern state in India                                                                                                                      | 1                                                                | Article       | 2                           |
| 243 | The occurrence of vulvovaginal <i>Candida</i> species and their antifungal susceptibility pattern in HIV seropositive women in Ahvaz, Southwest Iran                                                                            | 1                                                                | Article       | 0                           |
| 244 | Nutrition status and inequality among children in different geographical regions of Maharashtra, India                                                                                                                          | 1                                                                | Article       | 2                           |
| 245 | Being unvaccinated and contact with measles cases as the risk factors of measles outbreak, North Sumatera, Indonesia                                                                                                            | 1                                                                | Article       | 1                           |
| 246 | Screening for vision impairment and ocular morbidities among adolescents and young adults in urban and rural areas of southern part of India                                                                                    | 1                                                                | Article       | 0                           |
| 247 | Cigarette smoke exposure and increased risks of stunting among under-five children                                                                                                                                              | 1                                                                | Article       | 1                           |
| 248 | Psychometric properties of the Persian version of General Self-Efficacy Scale (GSES) among substance abusers the year 2019-2020 in Kermanshah city                                                                              | 1                                                                | Article       | 1                           |
| 249 | Seroprevalence of Toxocariasis in schoolchildren in Bushehr, Iran                                                                                                                                                               | 1                                                                | Article       | 0                           |
| 250 | What are the beliefs and behaviours related to sport nutrition supplements, particularly regarding UAE regulatory issues, among male fitness centre members in Dubai?                                                           | 1                                                                | Article       | 2                           |
| 251 | Does cost of care influence the glycemic control, psychosocial illness and quality of care among adolescents with type 1 diabetes?: A hospital based cross section study in Mysuru, Karnataka                                   | 1                                                                | Article       | 0                           |
| 252 | Economic evaluation of End Stage Renal Disease treatments in Iran                                                                                                                                                               | 1                                                                | Article       | 3                           |

**Data source:** Web of Science

**Table S5 List of articles published in *Global Health Action* in 2020**

| No. | Title                                                                                                                                                            | COVID-19-related publication = 0<br>non-COVID-19 publication = 1 | Document type | Number of citations in 2021 |
|-----|------------------------------------------------------------------------------------------------------------------------------------------------------------------|------------------------------------------------------------------|---------------|-----------------------------|
| 1   | Identifying geographical heterogeneity of pulmonary tuberculosis in southern Ethiopia: a method to identify clustering for targeted interventions                | 1                                                                | Article       | 2                           |
| 2   | The evolution of minimally invasive tissue sampling in postmortem examination: a narrative review                                                                | 1                                                                | Review        | 18                          |
| 3   | Long-term trends in seasonality of mortality in urban Madagascar: the role of the epidemiological transition                                                     | 1                                                                | Article       | 1                           |
| 4   | Migrants' perceptions of health system responsiveness and satisfaction with health workers in a South African Province                                           | 1                                                                | Article       | 2                           |
| 5   | Factors associated with child malnutrition in mountainous ethnic minority communities in Lao PDR                                                                 | 1                                                                | Article       | 2                           |
| 6   | Factors associated with patient payments exceeding National Health Insurance fees and out-of-pocket payments in Lao PDR                                          | 1                                                                | Article       | 0                           |
| 7   | The risk of corruption in public pharmaceutical procurement: how anti-corruption, transparency and accountability measures may reduce this risk                  | 1                                                                | Review        | 6                           |
| 8   | Key indicators for appraising adolescent sexual and reproductive health in South Asia: international expert consensus exercise using the Delphi technique        | 1                                                                | Article       | 1                           |
| 9   | Effect of an integrated neonatal care kit on cause-specific neonatal mortality in rural Pakistan                                                                 | 1                                                                | Article       | 1                           |
| 10  | Building Strong Primary Health Care to Tackle the Growing Burden of Non-Communicable Diseases in Nepal                                                           | 1                                                                | Article       | 3                           |
| 11  | Measuring mental health burden in humanitarian settings: a critical review of assessment tools                                                                   | 1                                                                | Review        | 3                           |
| 12  | Early detection of type 2 diabetes in socioeconomically disadvantaged areas in Stockholm - comparing reach of community and facility-based screening             | 1                                                                | Article       | 2                           |
| 13  | Female health-care providers' advocacy of self-sampling after participating in a workplace program for cervical cancer screening in Ghana: a mixed-methods study | 1                                                                | Article       | 0                           |
| 14  | Developing sustainable capacity-building in mental health research: implementation outcomes of training of trainers in systematic reviewing                      | 1                                                                | Article       | 2                           |

| No. | Title                                                                                                                                                           | COVID-19-related publication = 0<br>non-COVID-19 publication = 1 | Document type | Number of citations in 2021 |
|-----|-----------------------------------------------------------------------------------------------------------------------------------------------------------------|------------------------------------------------------------------|---------------|-----------------------------|
| 15  | Right To Play's intervention to reduce peer violence among children in public schools in Pakistan: a cluster-randomized controlled trial                        | 1                                                                | Article       | 4                           |
| 16  | Outcomes of a multifaceted intervention to improve maternal satisfaction with care in secondary hospitals in Nigeria                                            | 1                                                                | Article       | 0                           |
| 17  | Rape survivors in South Africa: analysis of the baseline socio-demographic and health characteristics of a rape cohort                                          | 1                                                                | Article       | 1                           |
| 18  | Strengthening resistance to the COVID-19 pandemic and fostering future resilience requires concerted action on obesity                                          | 0                                                                | Article       | 3                           |
| 19  | Fast food consumption among young adolescents aged 12-15 years in 54 low- and middle-income countries                                                           | 1                                                                | Article       | 5                           |
| 20  | Monitoring the status of selected health related sustainable development goals: methods and projections to 2030                                                 | 1                                                                | Article       | 0                           |
| 21  | Factors affecting knowledge of National Health Insurance Policy among out-patients in Lao PDR: an exit interview study                                          | 1                                                                | Article       | 1                           |
| 22  | Optimizing Test and Treat in Malawi: health care worker perspectives on barriers and facilitators to ART initiation among HIV-infected clients who feel healthy | 1                                                                | Article       | 3                           |
| 23  | Physicians' satisfaction with clinical referral laboratories in Rwanda                                                                                          | 1                                                                | Article       | 0                           |
| 24  | Changes in risk factors for non-communicable diseases associated with the 'Healthy choices at work' programme, South Africa                                     | 1                                                                | Article       | 2                           |
| 25  | Anti-corruption, transparency and accountability in health: concepts, frameworks, and approaches                                                                | 1                                                                | Review        | 7                           |
| 26  | Women's development group leaders' promotion of maternal, neonatal and child health care in Ethiopia: a cross-sectional study                                   | 1                                                                | Article       | 3                           |
| 27  | Promoting equity in maternal, newborn and child health - how does gender factor in? Perceptions of public servants in the Ethiopian health sector               | 1                                                                | Article       | 0                           |
| 28  | mHealth for image-based diagnostics of acute burns in resource-poor settings: studies on the role of experts and the accuracy of their assessments              | 1                                                                | Review        | 2                           |

| No. | Title                                                                                                                                                                                                                                                                                | COVID-19-related publication = 0<br>non-COVID-19 publication = 1 | Document type | Number of citations in 2021 |
|-----|--------------------------------------------------------------------------------------------------------------------------------------------------------------------------------------------------------------------------------------------------------------------------------------|------------------------------------------------------------------|---------------|-----------------------------|
| 29  | Negotiating social norms, the legacy of vertical health initiatives and contradicting health policies: a qualitative study of health professionals' perceptions and attitudes of providing adolescent sexual and reproductive health care in Arusha and Kilimanjaro region, Tanzania | 1                                                                | Article       | 3                           |
| 30  | The role of participation and community mobilisation in preventing violence against women and girls: a programme review and critique                                                                                                                                                 | 1                                                                | Review        | 5                           |
| 31  | Describing the pattern of the COVID-19 epidemic in Vietnam                                                                                                                                                                                                                           | 0                                                                | Article       | 15                          |
| 32  | Evaluation of an integrated HIV and hypertension management model in rural south africa: a mixed methods approach                                                                                                                                                                    | 1                                                                | Review        | 3                           |
| 33  | Births and deaths in Sidama in southern Ethiopia: findings from the 2018 Dale-Wonsho Health and Demographic Surveillance System (HDSS)                                                                                                                                               | 1                                                                | Article       | 1                           |
| 34  | Eco-epidemiological assessment of the COVID-19 epidemic in China, January-February 2020                                                                                                                                                                                              | 0                                                                | Article       | 29                          |
| 35  | Stigmatization of men who have sex with men in health care settings in East Africa is based more on perceived gender role-inappropriate mannerisms than having sex with men                                                                                                          | 1                                                                | Article       | 1                           |
| 36  | Promoting anti-corruption, transparency and accountability in the recruitment and promotion of health workers to safeguard health outcomes                                                                                                                                           | 1                                                                | Review        | 0                           |
| 37  | Reconciling model predictions with low reported cases of COVID-19 in Sub-Saharan Africa: insights from Madagascar                                                                                                                                                                    | 0                                                                | Article       | 8                           |
| 38  | In-service nurse mentoring in 2020, the year of the nurse and the midwife: learning from Bihar, India                                                                                                                                                                                | 1                                                                | Article       | 0                           |
| 39  | Key issues for participatory research in the design and implementation of humanitarian assistance: a scoping review                                                                                                                                                                  | 1                                                                | Review        | 1                           |
| 40  | The gender responsiveness of social marketing interventions focused on neglected tropical diseases                                                                                                                                                                                   | 1                                                                | Review        | 0                           |
| 41  | Depression and mental wellbeing in people affected by leprosy in southern Nepal                                                                                                                                                                                                      | 1                                                                | Article       | 2                           |
| 42  | Establishment of COVID-19 testing laboratory in resource-limited settings: challenges and prospects reported from Ethiopia                                                                                                                                                           | 0                                                                | Article       | 3                           |

| No. | Title                                                                                                                                                                                                                                                              | COVID-19-related publication = 0<br>non-COVID-19 publication = 1 | Document type | Number of citations in 2021 |
|-----|--------------------------------------------------------------------------------------------------------------------------------------------------------------------------------------------------------------------------------------------------------------------|------------------------------------------------------------------|---------------|-----------------------------|
| 43  | Midwifery education, regulation and association in the Democratic Republic of Congo (DRC) - current state and challenges                                                                                                                                           | 1                                                                | Article       | 3                           |
| 44  | Implementation of the INTERGROWTH-21(st) gestational dating and fetal and newborn growth standards in Nairobi, Kenya: women's experiences with ultrasound and newborn assessment<br>Women's experiences with ultrasound and newborn assessment in peri-urban Kenya | 1                                                                | Article       | 2                           |
| 45  | Standardized mortality ratios between street-connected young people and the general age-equivalent population in an urban setting in Kenya from 2010 to 2015                                                                                                       | 1                                                                | Article       | 4                           |
| 46  | Exploring national human resource profile and trends of Prosthetists/Orthotists in South Africa from 2002 to 2018                                                                                                                                                  | 1                                                                | Article       | 1                           |
| 47  | Key challenges of health care workers in implementing the integrated management of childhood illnesses (IMCI) program: a scoping review                                                                                                                            | 1                                                                | Review        | 4                           |
| 48  | Knowledge of safe sex and sexually transmitted infections among high school students, Vientiane Prefecture, Lao PDR                                                                                                                                                | 1                                                                | Article       | 0                           |
| 49  | Implementation of two alcohol reduction interventions among persons with hazardous alcohol use who are living with HIV in Thai Nguyen, Vietnam: a micro-costing analysis                                                                                           | 1                                                                | Article       | 1                           |
| 50  | Fetal heart rate monitoring practices at a public hospital in Northern Uganda - what health workers document, do and say                                                                                                                                           | 1                                                                | Article       | 2                           |
| 51  | Challenges with tracing patients on antiretroviral therapy who are late for clinic appointments in rural South Africa and recommendations for future practice                                                                                                      | 1                                                                | Article       | 1                           |
| 52  | National incidence, prevalence and disability-adjusted life years (DALYs) of common micronutrient deficiencies in Ethiopia from 1990 to 2017: estimates from the global burden of diseases study                                                                   | 1                                                                | Article       | 1                           |
| 53  | Implementation of accelerated research: strategies for implementation as applied in a phase 1 Ad26.ZEBOV, MVA-BN-Filo two-dose Ebola vaccine clinical trial in Uganda                                                                                              | 1                                                                | Article       | 3                           |
| 54  | HIV-positive migrants' experience of living in Sweden                                                                                                                                                                                                              | 1                                                                | Article       | 1                           |

| No. | Title                                                                                                                                                                                       | COVID-19-related publication = 0<br>non-COVID-19 publication = 1 | Document type | Number of citations in 2021 |
|-----|---------------------------------------------------------------------------------------------------------------------------------------------------------------------------------------------|------------------------------------------------------------------|---------------|-----------------------------|
| 55  | Does health insurance contribute to improved utilization of health care services for the elderly in rural Tanzania? A cross-sectional study                                                 | 1                                                                | Article       | 2                           |
| 56  | The Menstrual Practices Questionnaire (MPQ): development, elaboration, and implications for future research                                                                                 | 1                                                                | Article       | 1                           |
| 57  | Ad hoc interpreters in South African psychiatric services: service provider perspectives                                                                                                    | 1                                                                | Article       | 1                           |
| 58  | What can we learn from studying control arms of randomised VAW prevention intervention evaluations: reflections on expected measurement error, meaningful change and the utility of RCTs    | 1                                                                | Article       | 0                           |
| 59  | Health literacy meets the life-course perspective: towards a conceptual framework                                                                                                           | 1                                                                | Article       | 2                           |
| 60  | Anaemia among adolescents: assessing a public health concern in Lao PDR                                                                                                                     | 1                                                                | Article       | 1                           |
| 61  | Evaluation of the rural response system intervention to prevent violence against women: findings from a community-randomised controlled trial in the Central Region of Ghana                | 1                                                                | Article       | 2                           |
| 62  | Building cooperative learning to address alcohol and other drug abuse in Mpumalanga, South Africa: a participatory action research process                                                  | 1                                                                | Article       | 3                           |
| 63  | Developing a national health research agenda for Lao PDR: prioritising the research needs of stakeholders                                                                                   | 1                                                                | Article       | 0                           |
| 64  | Direct assessment of mental health and metabolic syndrome amongst Indonesian adolescents: a study design for a mixed-methods study sampled from school and community settings               | 1                                                                | Article       | 0                           |
| 65  | Capacity building, local ownership and implementation of a multi-level HIV/AIDS positive health, dignity, and prevention initiative in Mozambique: approach, challenges and lessons learned | 1                                                                | Article       | 0                           |
| 66  | Age-related patterns of early childhood development practices amongst rural families in Burkina Faso: findings from a nationwide survey of mothers of children aged 0-3 years               | 1                                                                | Article       | 1                           |
| 67  | Responding to aid volatility: government spending on district health care in Zambia 2006-2017                                                                                               | 1                                                                | Article       | 1                           |
| 68  | Ongoing debate on data governance principles for achieving Universal Health Coverage: a proposal to post-G20 Osaka Summit meetings                                                          | 1                                                                | Article       | 0                           |



| No. | Title                                                                                                                                                                                   | COVID-19-related publication = 0<br>non-COVID-19 publication = 1 | Document type | Number of citations in 2021 |
|-----|-----------------------------------------------------------------------------------------------------------------------------------------------------------------------------------------|------------------------------------------------------------------|---------------|-----------------------------|
| 69  | Decentralization of birth registration to Local Government in Tanzania: the association with completeness of birth registration and certification                                       | 1                                                                | Article       | 0                           |
| 70  | Death registration in Nigeria: a systematic literature review of its performance and challenges                                                                                         | 1                                                                | Review        | 3                           |
| 71  | 'Fighting an uphill battle': a qualitative study of the challenges encountered by pharmacy workers when providing services to men who have sex with men in Dar es Salaam, Tanzania      | 1                                                                | Article       | 1                           |
| 72  | Increasing collaborative research output between early-career health researchers in Africa: lessons from the CARTA fellowship program                                                   | 1                                                                | Article       | 1                           |
| 73  | Interrelationships between early antenatal care, health facility delivery and early postnatal care among women in Uganda: a structural equation analysis                                | 1                                                                | Article       | 3                           |
| 74  | Implementation of a context-specific accreditation assessment tool for affirming quality midwifery education in Bangladesh: a qualitative research study                                | 1                                                                | Article       | 1                           |
| 75  | Using relevance mapping methodology to design an adolescent mental health intervention in India                                                                                         | 1                                                                | Article       | 1                           |
| 76  | Learning Active Implementation Frameworks: the role of implementation teams in a case study from Pakistan                                                                               | 1                                                                | Article       | 1                           |
| 77  | Out-of-pocket expenditure for hypertension care: a population-based study in low-income urban Medellin, Colombia                                                                        | 1                                                                | Article       | 3                           |
| 78  | Are people most in need utilising health facilities in post-conflict settings? A cross-sectional study from South Kivu, eastern DR Congo                                                | 1                                                                | Article       | 0                           |
| 79  | Universal access to essential medicines as part of the right to health: a cross-national comparison of national laws, medicines policies, and health system indicators                  | 1                                                                | Review        | 3                           |
| 80  | Investigation of stillbirth causes in Suriname: application of the WHO ICD-PM tool to national-level hospital data                                                                      | 1                                                                | Article       | 2                           |
| 81  | Spousal violence against women and its association with sociodemographic factors and husbands' controlling behaviour: the findings of Myanmar Demographic and Health Survey (2015-2016) | 1                                                                | Article       | 1                           |
| 82  | Community perceptions of universal health coverage in eight districts of the Northern and Volta regions of Ghana                                                                        | 1                                                                | Article       | 1                           |

| No. | Title                                                                                                                                                                                                                                                           | COVID-19-related publication = 0<br>non-COVID-19 publication = 1 | Document type | Number of citations in 2021 |
|-----|-----------------------------------------------------------------------------------------------------------------------------------------------------------------------------------------------------------------------------------------------------------------|------------------------------------------------------------------|---------------|-----------------------------|
| 83  | Menstruation practice among school and out-of-school adolescent girls, Lao PDR                                                                                                                                                                                  | 1                                                                | Article       | 0                           |
| 84  | Utility of the three-delays model and its potential for supporting a solution-based approach to accessing intrapartum care in low- and middle-income countries. A qualitative evidence synthesis                                                                | 1                                                                | Review        | 3                           |
| 85  | Measuring management practices in primary health care facilities - development and validation of management practices scorecard in Nigeria                                                                                                                      | 1                                                                | Article       | 0                           |
| 86  | Exclusive breastfeeding among HIV exposed infants from birth to 14 weeks of life in Lira, Northern Uganda: a prospective cohort study                                                                                                                           | 1                                                                | Article       | 0                           |
| 87  | To start or to complete? - Challenges in implementing tuberculosis preventive therapy among people living with HIV: a mixed-methods study from Karnataka, India                                                                                                 | 1                                                                | Article       | 2                           |
| 88  | Predictors of health care practitioners' normative attitudes and practices towards sexual and reproductive health and rights: a cross-sectional study of participants from low-income countries enrolled in a capacity-building program                         | 1                                                                | Article       | 1                           |
| 89  | Global child health in Germany-Time for action                                                                                                                                                                                                                  | 1                                                                | Article       | 0                           |
| 90  | Anti-corruption, Transparency and Accountability: Case Study of Healthcare in the Arab Countries                                                                                                                                                                | 1                                                                | Article       | 1                           |
| 91  | Biological larviciding against malaria vector mosquitoes with <i>Bacillus thuringiensis israelensis</i> (Bti)- Long term observations and assessment of repeatability during an additional intervention year of a large-scale field trial in rural Burkina Faso | 1                                                                | Article       | 3                           |
| 92  | Playing the complex game of social status in school - a qualitative study                                                                                                                                                                                       | 1                                                                | Article       | 0                           |
| 93  | A systems approach to assessing complexity in health interventions: an effectiveness decay model for integrated community case management                                                                                                                       | 1                                                                | Article       | 0                           |
| 94  | Sexual and reproductive health mobile apps: results from a cross-sectional values and preferences survey to inform World Health Organization normative guidance on self-care interventions                                                                      | 1                                                                | Article       | 0                           |

| No. | Title                                                                                                                                                                                                       | COVID-19-related publication = 0<br>non-COVID-19 publication = 1 | Document type      | Number of citations in 2021 |
|-----|-------------------------------------------------------------------------------------------------------------------------------------------------------------------------------------------------------------|------------------------------------------------------------------|--------------------|-----------------------------|
| 95  | Government stakeholders' perspectives on the family planning environment in three Nigerian cities: qualitative findings from the Nigerian Urban Reproductive Health Initiative (NURHI) Sustainability Study | 1                                                                | Article            | 0                           |
| 96  | Ascertaining cause of mortality among middle-aged and older persons using computer-coded and expert review verbal autopsies in the China Health and Retirement Longitudinal Study                           | 1                                                                | Review             | 0                           |
| 97  | Research provides evidence for health policy in Lao PDR                                                                                                                                                     | 1                                                                | Editorial Material | 1                           |
| 98  | Knowledge of and attitudes towards abortion among adolescents in Lao PDR                                                                                                                                    | 1                                                                | Article            | 0                           |
| 99  | Measuring child survival for the Millennium Development Goals in Africa: what have we learned and what more is needed to evaluate the Sustainable Development Goals?                                        | 1                                                                | Article            | 1                           |
| 100 | Strengthening research capacity in LMICs to address the global NCD burden                                                                                                                                   | 1                                                                | Article            | 2                           |
| 101 | EviSIP: using evidence to change practice through mentorship - an innovative experience for reproductive health in the Latin American and Caribbean regions                                                 | 1                                                                | Article            | 2                           |
| 102 | Evaluating health service coverage in Ghana's Volta Region using a modified Tanahashi model                                                                                                                 | 1                                                                | Article            | 4                           |
| 103 | Married couples' dynamics, gender attitudes and contraception use in Savannakhet Province, Lao PDR                                                                                                          | 1                                                                | Article            | 0                           |
| 104 | Recalibrating the anti-corruption, transparency, and accountability formula to advance public health                                                                                                        | 1                                                                | Article            | 2                           |
| 105 | A twin disaster: Addressing the COVID-19 pandemic and a cerebrospinal meningitis outbreak simultaneously in a low-resource country                                                                          | 0                                                                | Article            | 3                           |
| 106 | Implications of COVID-19 control measures for diet and physical activity, and lessons for addressing other pandemics facing rapidly urbanising countries                                                    | 0                                                                | Article            | 11                          |
| 107 | Scale-up integrated care for diabetes and hypertension in Cambodia, Slovenia and Belgium (SCUBY): a study design for a quasi-experimental multiple case study                                               | 1                                                                | Article            | 5                           |
| 108 | Quality of family planning services for women of reproductive age in Lao PDR                                                                                                                                | 1                                                                | Article            | 0                           |

| No. | Title                                                                                                                                                                                                                                                                       | COVID-19-related publication = 0<br>non-COVID-19 publication = 1 | Document type | Number of citations in 2021 |
|-----|-----------------------------------------------------------------------------------------------------------------------------------------------------------------------------------------------------------------------------------------------------------------------------|------------------------------------------------------------------|---------------|-----------------------------|
| 109 | Pregnancy outcomes among women born in Somalia and Sweden giving birth in the Stockholm area - a population-based study                                                                                                                                                     | 1                                                                | Article       | 1                           |
| 110 | Academic-humanitarian partnerships: leveraging strengths to combat COVID-19                                                                                                                                                                                                 | 0                                                                | Article       | 3                           |
| 111 | Global progress in tobacco control: the question of policy compliance                                                                                                                                                                                                       | 1                                                                | Article       | 2                           |
| 112 | Implementing effective e-Learning for scaling up global capacity building: findings from the malnutrition elearning course evaluation in Ghana                                                                                                                              | 1                                                                | Article       | 1                           |
| 113 | Adding video-debriefing to Helping-Babies-Breathe training enhanced retention of neonatal resuscitation knowledge and skills among health workers in Uganda: a cluster randomized trial                                                                                     | 1                                                                | Article       | 5                           |
| 114 | Development and application of an electronic treatment register: a system for enumerating populations and monitoring treatment during mass drug administration                                                                                                              | 1                                                                | Article       | 3                           |
| 115 | Adaptation of a mobile phone health survey for risk factors for noncommunicable diseases in Colombia: a qualitative study                                                                                                                                                   | 1                                                                | Article       | 2                           |
| 116 | Concerned and Conscious, but DefenselessThe intersection of gender and generation in child malnutrition in Indonesia: a qualitative grounded theory study The intersection of gender and generation in child malnutrition in Indonesia: a qualitative grounded theory study | 1                                                                | Article       | 0                           |
| 117 | Human rights mechanisms for anti-corruption, transparency and accountability: enabling the right to health                                                                                                                                                                  | 1                                                                | Article       | 0                           |
| 118 | One-arm safety intervention study on community case management of chest indrawing pneumonia in children in Nigeria - a study protocol                                                                                                                                       | 1                                                                | Article       | 0                           |
| 119 | The relationship between Indigenous and allopathic health practitioners in Africa and its implications for collaboration: a qualitative synthesis                                                                                                                           | 1                                                                | Article       | 0                           |
| 120 | 'Violence exists to show manhood': Nepali men's views on domestic violence - a qualitative study                                                                                                                                                                            | 1                                                                | Article       | 0                           |
| 121 | Factors influencing sexual and reproductive health among adolescents in Lao PDR                                                                                                                                                                                             | 1                                                                | Article       | 2                           |

| No. | Title                                                                                                                                                                                                  | COVID-19-related publication = 0<br>non-COVID-19 publication = 1 | Document type      | Number of citations in 2021 |
|-----|--------------------------------------------------------------------------------------------------------------------------------------------------------------------------------------------------------|------------------------------------------------------------------|--------------------|-----------------------------|
| 122 | Promoting anti-corruption, transparency and accountability to achieve universal health coverage                                                                                                        | 1                                                                | Editorial Material | 1                           |
| 123 | Everything is from God but it is always better to get to the hospital on time: A qualitative study with community members to identify factors that influence facility delivery in Gombe State, Nigeria | 1                                                                | Article            | 0                           |
| 124 | Neurodevelopmental outcomes of preterm babies during infancy in Eastern Uganda: a prospective cohort study                                                                                             | 1                                                                | Article            | 3                           |
| 125 | A definition of global oral health: An expert consensus approach by the Consortium of Universities for Global Health's Global Oral Health Interest Group                                               | 1                                                                | Article            | 1                           |
| 126 | An interdisciplinary review of digital technologies to facilitate anti-corruption, transparency and accountability in medicines procurement                                                            | 1                                                                | Review             | 4                           |
| 127 | Factors contributing to the uptake of childhood vaccination in Galkayo District, Puntland, Somalia                                                                                                     | 1                                                                | Article            | 1                           |
| 128 | We do what we can do to save a woman health workers' perceptions of health facility readiness for management of postpartum haemorrhage                                                                 | 1                                                                | Article            | 5                           |
| 129 | Diabetes in urban Guinea-Bissau; patient characteristics, mortality and prevalence of undiagnosed dysglycemia                                                                                          | 1                                                                | Article            | 1                           |
| 130 | Lessons learned about co-creation: developing a complex intervention in rural Peru                                                                                                                     | 1                                                                | Article            | 6                           |
| 131 | Assessing completeness of patient medical records of surgical and obstetric patients in Northern Tanzania                                                                                              | 1                                                                | Article            | 4                           |
| 132 | Using a mHealth system to recall and refer existing clients and refer community members with health concerns to primary healthcare facilities in South Africa: a feasibility study                     | 1                                                                | Article            | 2                           |
| 133 | Sexual and reproductive health communication between parents and high school adolescents in Vientiane Prefecture, Lao PDR                                                                              | 1                                                                | Article            | 0                           |
| 134 | Translating international guidelines for use in routine maternal and neonatal healthcare quality measurement                                                                                           | 1                                                                | Article            | 0                           |
| 135 | Social, economic, and political events affect gender equity in China, Nepal, and Nicaragua: a matched, interrupted time-series study                                                                   | 1                                                                | Article            | 1                           |

| No. | Title                                                                                                                                                                               | COVID-19-related publication = 0<br>non-COVID-19 publication = 1 | Document type | Number of citations in 2021 |
|-----|-------------------------------------------------------------------------------------------------------------------------------------------------------------------------------------|------------------------------------------------------------------|---------------|-----------------------------|
| 136 | Cesarean delivery and associated socioeconomic factors and neonatal survival outcome in Kenya and Tanzania: analysis of national survey data                                        | 1                                                                | Article       | 2                           |
| 137 | Social determinants of health: the role of effective communication in the COVID-19 pandemic in developing countries                                                                 | 0                                                                | Article       | 30                          |
| 138 | Noncommunicable Disease (NCD) strategic plans in low- and lower-middle income Sub-Saharan Africa: framing and policy response                                                       | 1                                                                | Article       | 3                           |
| 139 | New learnings on drivers of men's physical and/or sexual violence against their female partners, and women's experiences of this, and the implications for prevention interventions | 1                                                                | Review        | 16                          |
| 140 | Research challenges in evaluating gender-based violence response services in a refugee camp                                                                                         | 1                                                                | Article       | 0                           |
| 141 | The roles, responsibilities and perceptions of community health workers and ward-based primary health care outreach teams: a scoping review                                         | 1                                                                | Review        | 2                           |
| 142 | Stillbirth in Lao PDR: a healthcare provider perspective                                                                                                                            | 1                                                                | Article       | 1                           |
| 143 | Pregnancy health literacy among teenagers in Kaysone district, Savannakhet Province, Lao PDR                                                                                        | 1                                                                | Article       | 0                           |

**Data source:** Web of Science

**Table S6 List of articles published in *Global Health Epidemiology and Genomics* in 2020**

| No. | Title                                                                                                                                          | COVID-19-related publication = 0<br>non-COVID-19 publication = 1 | Document type | Number of citations in 2021 |
|-----|------------------------------------------------------------------------------------------------------------------------------------------------|------------------------------------------------------------------|---------------|-----------------------------|
| 1   | Health impact of the Anthropocene: the complex relationship between gut microbiota, epigenetics, and human health, using obesity as an example | 1                                                                | Review        | 9                           |
| 2   | Obesity population at risk of COVID-19 complications                                                                                           | 0                                                                | Review        | 10                          |
| 3   | Patients' perceptions of self-management of high blood pressure in three low- and middle-income countries: findings from the BPMONITOR study   | 1                                                                | Article       | 0                           |
| 4   | The Nigerian Bioinformatics and Genomics Network (NBGN): a collaborative platform to advance bioinformatics and genomics in Nigeria            | 1                                                                | Article       | 0                           |
| 5   | The Sri Lankan twin registry biobank: South Asia's first twin biobank                                                                          | 1                                                                | Article       | 0                           |
| 6   | Tobacco smoking as a risk factor for tuberculous pleural effusion: a case-control study                                                        | 1                                                                | Article       | 0                           |

**Data source:** Web of Science

**Table S7 List of articles published in *Global Health Promotion* in 2020**

| No. | Title                                                                                                                                                              | COVID-19-related publication = 0<br>non-COVID-19 publication = 1 | Document type      | Number of citations in 2021 |
|-----|--------------------------------------------------------------------------------------------------------------------------------------------------------------------|------------------------------------------------------------------|--------------------|-----------------------------|
| 1   | Le developpement d'une collaboration inter organisationelle durable en promotion de la sante : une analyse processuelle                                            | 1                                                                | Article            | 0                           |
| 2   | Analisis de la capacidad de respuesta comunitaria para desarrollar iniciativas de promocion de la salud                                                            | 1                                                                | Article            | 0                           |
| 3   | Barreras y facilitadores para una alimentacion saludable y actividad fisica en mujeres embarazadas con sobrepeso y obesidad                                        | 1                                                                | Article            | 0                           |
| 4   | Contexto de procedencia, autopercepcion y expectativas de los jovenes en situacion de encierro                                                                     | 1                                                                | Article            | 0                           |
| 5   | A consensus-building strategy of health promotion in the Americas                                                                                                  | 1                                                                | Editorial Material | 0                           |
| 6   | Une strategie consensuelle de promotion de la sante dans les Ameriques                                                                                             | 1                                                                | Editorial Material | 0                           |
| 7   | Una estrategia consensuada de promocion de la salud en las Americas                                                                                                | 1                                                                | Editorial Material | 0                           |
| 8   | Sleep, physical activity, waist circumference and diet as factors that influence health for reproductive age women in northern Greenland                           | 1                                                                | Article            | 1                           |
| 9   | Analysis of a school-based health education model to prevent opisthorchiasis and cholangiocarcinoma in primary school children in northeast Thailand               | 1                                                                | Article            | 3                           |
| 10  | The comparative and objective measurement of health promotion capacity-building: from conceptual framework to operationalization                                   | 1                                                                | Article            | 0                           |
| 11  | The application of mHealth to monitor implementation of best practices to support healthy eating and physical activity in afterschool programs                     | 1                                                                | Article            | 0                           |
| 12  | Establishing a local coalition for addressing social determinants of hypertension in Quibdo (Colombia): a description and reflection on the process                | 1                                                                | Article            | 0                           |
| 13  | Comparative impact of fear appeals and induced hypocrisy advertising in encouraging intent to quit smoking: Applying self-construal theory to consumers' attitudes | 1                                                                | Article            | 0                           |



| No. | Title                                                                                                                                                                                               | COVID-19-related publication = 0<br>non-COVID-19 publication = 1 | Document type      | Number of citations in 2021 |
|-----|-----------------------------------------------------------------------------------------------------------------------------------------------------------------------------------------------------|------------------------------------------------------------------|--------------------|-----------------------------|
| 14  | Community readiness assessment for disseminating evidence-based physical activity programs to older adults in Changsha, China: a case for Enhance (R) Fitness                                       | 1                                                                | Article            | 0                           |
| 15  | Healthy Universities. The development and implementation of a holistic health promotion intervention programme especially adapted for staff working in the higher educational sector: the ARK study | 1                                                                | Article            | 3                           |
| 16  | Asymetrie de pouvoir dans les partenariats de recherche en sante mondiale : etude qualitative aupres de chercheurs en Cote d'Ivoire                                                                 | 1                                                                | Article            | 0                           |
| 17  | Health promotion strategy as part of Vision 2050 in Oman: the way forward                                                                                                                           | 1                                                                | Editorial Material | 1                           |
| 18  | Use of educational technologies in the promotion of children's cardiovascular health: a systematic review                                                                                           | 1                                                                | Review             | 1                           |
| 19  | Social capital, gender, and health: an ethnographic analysis of women in a Mumbai slum                                                                                                              | 1                                                                | Article            | 1                           |
| 20  | Using photovoice to understand the context of cervical cancer screening for underserved communities in rural India                                                                                  | 1                                                                | Article            | 0                           |
| 21  | Grounding evaluation design in the socio-ecological model of health: a logic framework for the assessment of a national routine immunization communication initiative in Kyrgyzstan                 | 1                                                                | Article            | 1                           |
| 22  | Developing the culture of ethics in population health intervention research in Canada                                                                                                               | 1                                                                | Article            | 0                           |
| 23  | A 'whole systems' approach to reduce sugar-sweetened beverage consumption: issues for global health promotion through a small island lens                                                           | 1                                                                | Editorial Material | 0                           |
| 24  | Examining the appropriateness and reliability of the strategy of the Kenyan Comprehensive School Health Program                                                                                     | 1                                                                | Article            | 1                           |
| 25  | Addressing the commercial determinants of health begins with clearer definition and measurement                                                                                                     | 1                                                                | Editorial Material | 6                           |
| 26  | An Internet for Some threatens health for All What effects could the repeal of net neutrality in the USA have on individual and population health?                                                  | 1                                                                | Editorial Material | 0                           |
| 27  | A role for traditional doctors in health promotion: experience from a trial of HIV prevention in Botswana                                                                                           | 1                                                                | Editorial Material | 1                           |
| 28  | What are the roles of community health workers? Looking back at the philosophies of primary health care                                                                                             | 1                                                                | Editorial Material | 0                           |

| No. | Title                                                                                                                                                        | COVID-19-related publication = 0<br>non-COVID-19 publication = 1 | Document type      | Number of citations in 2021 |
|-----|--------------------------------------------------------------------------------------------------------------------------------------------------------------|------------------------------------------------------------------|--------------------|-----------------------------|
| 29  | Using laws to further public health causes: the Healthy Prisons Agenda                                                                                       | 1                                                                | Editorial Material | 0                           |
| 30  | Addressing the commercial determinants of health begins with a clearer definition and measurement of these determinants                                      | 1                                                                | Editorial Material | 0                           |
| 31  | Better understanding the challenges of the medicalization of HIV prevention in France: pre-exposure prophylaxis through the prism of social sciences         | 1                                                                | Editorial Material | 0                           |
| 32  | Considering Commercial Determinants of Health Starts with More Precise Concepts                                                                              | 1                                                                | Editorial Material | 0                           |
| 33  | Challenges of developing a district child welfare plan in South Africa: lessons from a community-engaged HIV/AIDS research project                           | 1                                                                | Article            | 1                           |
| 34  | Development of a national conceptual framework and measuring tool for Organisational Social Responsibility and Accountability for Health (OSRAH)             | 1                                                                | Article            | 0                           |
| 35  | Impact of the Nutrition-Friendly School Initiative: analysis of anthropometric and biochemical data among school-aged children in Ouagadougou                | 1                                                                | Article            | 1                           |
| 36  | A stakeholder analysis of community-led collaboration to reduce health inequity in a deprived neighbourhood in South Korea                                   | 1                                                                | Article            | 5                           |
| 37  | Building the capacity - examining the impact of evidence-based public health trainings in Europe: a mixed methods approach                                   | 1                                                                | Article            | 3                           |
| 38  | 'When you are a data collector you must expect anything'. Barriers, boundaries and breakthroughs: insights from the South African data-collection experience | 1                                                                | Article            | 2                           |
| 39  | & xal;Activate Ya! Co-learning about school-based tobacco prevention and physical activity promotion in secondary school students in Uruguay                 | 1                                                                | Article            | 0                           |
| 40  | Reaching marginalized young women for HIV prevention in Botswana: a pilot social network analysis                                                            | 1                                                                | Article            | 0                           |

| No. | Title                                                                                                                                                                                                         | COVID-19-related publication = 0<br>non-COVID-19 publication = 1 | Document type      | Number of citations in 2021 |
|-----|---------------------------------------------------------------------------------------------------------------------------------------------------------------------------------------------------------------|------------------------------------------------------------------|--------------------|-----------------------------|
| 41  | Integrative settings approach to workplace health promotion to address contemporary challenges for worker health in the Asia-Pacific                                                                          | 1                                                                | Article            | 1                           |
| 42  | Gendered perceptions of osteoporosis: implications for youth prevention programs                                                                                                                              | 1                                                                | Article            | 0                           |
| 43  | Smokefree leadership among the YoLLATIN SMALL LETTER ENGu peoples of East Arnhem Land, Northern Territory: a qualitative study                                                                                | 1                                                                | Article            | 1                           |
| 44  | Developpement des Zones de Sante d'Apprentissage et de Recherche en Republique Democratique du Congo : enseignements utiles d'une evaluation qualitative des experiences anterieures en Afrique Subsaharienne | 1                                                                | Article            | 0                           |
| 45  | Empoderamiento y busqueda de atencion en salud: un factor ignorado de la mortalidad materna en una comunidad indigena mexicana                                                                                | 1                                                                | Article            | 1                           |
| 46  | Desafios para la promocion de la salud: El caso del mercado de las Formulas Infantiles en Mexico                                                                                                              | 1                                                                | Article            | 0                           |
| 47  | Health Equity in a globalizing era: past challenges, future prospects                                                                                                                                         | 1                                                                | Book Review        | 0                           |
| 48  | !Activate Ya! Co-learning about school-based tobacco prevention and physical activity promotion in secondary school students in Uruguay (vol 21, pg 961, 2020)                                                | 1                                                                | Correction         | 0                           |
| 49  | Non-communicable disease prevention: best buys, wasted buys and contestable buys                                                                                                                              | 1                                                                | Book Review        | 0                           |
| 50  | Psychosocial empowerment-based interventions for smoking reduction: concepts, measures and outcomes. A systematic review                                                                                      | 1                                                                | Review             | 1                           |
| 51  | Pro-equity legislation, health policy and utilisation of sexual and reproductive health services by vulnerable populations in sub-Saharan Africa: a systematic review                                         | 1                                                                | Review             | 1                           |
| 52  | Exploring the evolution of health promotion in Namibia: opportunities and obstacles during the post-independence era                                                                                          | 1                                                                | Article            | 0                           |
| 53  | Developing leadership in dentists and schoolteachers to improve oral health inequalities                                                                                                                      | 1                                                                | Editorial Material | 0                           |
| 54  | Primary school-based nutrition education intervention on nutrition knowledge, attitude and practices among school-age children in Ghana                                                                       | 1                                                                | Article            | 0                           |

| No. | Title                                                                                                                                                                        | COVID-19-related publication = 0<br>non-COVID-19 publication = 1 | Document type      | Number of citations in 2021 |
|-----|------------------------------------------------------------------------------------------------------------------------------------------------------------------------------|------------------------------------------------------------------|--------------------|-----------------------------|
| 55  | Towards a better integration of social sciences in arbovirus research and decision-making: an experience from scientific collaboration between Cuban and Quebec institutions | 1                                                                | Editorial Material | 0                           |
| 56  | Adoption and impact of improved cookstoves in Lambayeque, Peru, 2017                                                                                                         | 1                                                                | Article            | 3                           |
| 57  | A patchwork approach to gender equality weakens the SDGs: time for cross-cutting action                                                                                      | 1                                                                | Editorial Material | 0                           |
| 58  | A disparate approach to gender equality weakens DOs: time for cross-cutting action                                                                                           | 1                                                                | Editorial Material | 0                           |
| 59  | A partial approach to gender equality weakens the SDG: time for transverse action                                                                                            | 1                                                                | Editorial Material | 2                           |
| 60  | 'No one ever asked us': a feasibility study assessing the co-creation of a physical activity programme with adolescent girls                                                 | 1                                                                | Article            | 2                           |
| 61  | The food of life: an evaluation of the impact of cash grant receipt and good parenting on child nutrition outcomes in South Africa and Malawi                                | 1                                                                | Article            | 1                           |
| 62  | The effect of undergraduate nursing students' e-Health literacy on healthy lifestyle behaviour                                                                               | 1                                                                | Article            | 0                           |
| 63  | Coronavirus disease 2019 and slums in the Global South: lessons from Medellin (Colombia)                                                                                     | 0                                                                | Editorial Material | 0                           |
| 64  | A pilot project: handwashing educational intervention decreases incidence of respiratory and diarrheal illnesses in a rural Malawi orphanage                                 | 1                                                                | Article            | 2                           |
| 65  | Maternal and child health: is making 'healthy choices' an oxymoron?                                                                                                          | 1                                                                | Editorial Material | 2                           |
| 66  | Perspective on the responsibility of the pharmaceutical industry in the promotion of pediatric research and in access to essential drugs                                     | 1                                                                | Article            | 0                           |
| 67  | Roles for mHealth to support Community Health Workers addressing COVID-19                                                                                                    | 0                                                                | Editorial Material | 0                           |
| 68  | Health promotion perspectives on the COVID-19 pandemic: The importance of religion                                                                                           | 0                                                                | Article            | 9                           |
| 69  | Governmental and public thematic patterns on vaccination during a measles outbreak: the Romanian perspective                                                                 | 1                                                                | Article            | 0                           |
| 70  | Lyrics and artistic improvisations in health promotion for COVID-19 pandemic control in East Africa                                                                          | 0                                                                | Article            | 0                           |

| No. | Title                                                                                                                                                           | COVID-19-related publication = 0<br>non-COVID-19 publication = 1 | Document type      | Number of citations in 2021 |
|-----|-----------------------------------------------------------------------------------------------------------------------------------------------------------------|------------------------------------------------------------------|--------------------|-----------------------------|
| 71  | What would it take for health promotion to take structural racism seriously?                                                                                    | 1                                                                | Editorial Material | 4                           |
| 72  | What does it take for health promotion to take structural racism seriously?                                                                                     | 1                                                                | Editorial Material | 0                           |
| 73  | Building self-advocacy in HIV care: the use of role-play to examine healthcare access for HIV-positive MSM in rural South Africa                                | 1                                                                | Article            | 0                           |
| 74  | The health and economic burden of the coronavirus in sub-Saharan Africa                                                                                         | 0                                                                | Editorial Material | 3                           |
| 75  | Promoting the health of the population during the COVID-19 crisis: the role of municipalities in the canton of Vaud, in Switzerland                             | 0                                                                | Editorial Material | 0                           |
| 76  | Políticas públicas de promoción de salud en el contexto del Covid-19, en Chile, una aproximación desde el análisis                                              | 0                                                                | Article            | 4                           |
| 77  | Public policies adopted in the COVID-19 pandemic in three Latin American countries: contributions from Health Promotion not to return to the world that existed | 0                                                                | Article            | 3                           |

**Data source:** Web of Science

**Table S8 List of articles published in *Global Health Research and Policy* in 2020**

| No. | Title                                                                                                                                                                                     | COVID-19-related publication = 0<br>non-COVID-19 publication = 1 | Document type      | Number of citations in 2021 |
|-----|-------------------------------------------------------------------------------------------------------------------------------------------------------------------------------------------|------------------------------------------------------------------|--------------------|-----------------------------|
| 1   | What does women's empowerment have to do with malnutrition in Sub-Saharan Africa? Evidence from demographic and health surveys from 30 countries                                          | 1                                                                | Article            | 1                           |
| 2   | Estimated cost for cardiovascular disease risk-based management at a primary healthcare center in Nepal                                                                                   | 1                                                                | Article            | 2                           |
| 3   | Effect of sharing health messages on antenatal care behavior among women involved in microfinance-based self-help groups in Bihar India                                                   | 1                                                                | Article            | 0                           |
| 4   | The impact of anti-tobacco legislation on birth weight in Peru                                                                                                                            | 1                                                                | Article            | 10                          |
| 5   | Sex differences in the association between marital status and the risk of cardiovascular, cancer, and all-cause mortality: a systematic review and meta-analysis of 7,881,040 individuals | 1                                                                | Review             | 30                          |
| 6   | First two months of the 2019 Coronavirus Disease (COVID-19) epidemic in China: real-time surveillance and evaluation with a second derivative model                                       | 0                                                                | Article            | 90                          |
| 7   | The novel coronavirus outbreak in Wuhan, China                                                                                                                                            | 0                                                                | Article            | 3                           |
| 8   | Relationships among weight stigma, eating behaviors and stress in adolescents in Wuhan, China                                                                                             | 1                                                                | Article            | 10                          |
| 9   | The novel coronavirus outbreak: what can be learned from China in public reporting?                                                                                                       | 0                                                                | Editorial Material | 2                           |
| 10  | Frameworks for health systems performance assessment: how comprehensive is Ghana's holistic assessment tool?                                                                              | 1                                                                | Article            | 2                           |
| 11  | A protocol paper: community engagement interventions for cardiovascular disease prevention in socially disadvantaged populations in the UK: an implementation research study              | 1                                                                | Article            | 2                           |
| 12  | China-UK partnership for global health: practices and implications of the Global Health Support Programme 2012-2019                                                                       | 1                                                                | Article            | 1                           |
| 13  | What is global health? Key concepts and clarification of misperceptions: Report of the 2019 GHRP editorial meeting                                                                        | 1                                                                | Article            | 0                           |
| 14  | The case for gender considerate tobacco control policies in Albania                                                                                                                       | 1                                                                | Article            | 6                           |
| 15  | Canada's role in strengthening global health security during the COVID-19 pandemic                                                                                                        | 0                                                                | Editorial Material | 3                           |

| No. | Title                                                                                                                                                                                       | COVID-19-related publication = 0<br>non-COVID-19 publication = 1 | Document type      | Number of citations in 2021 |
|-----|---------------------------------------------------------------------------------------------------------------------------------------------------------------------------------------------|------------------------------------------------------------------|--------------------|-----------------------------|
| 16  | Developing a framework to inform scale-up success for population health interventions: a critical interpretive synthesis of the literature                                                  | 1                                                                | Review             | 4                           |
| 17  | Maternal PM2.5 exposure triggers preterm birth: a cross-sectional study in Wuhan, China                                                                                                     | 1                                                                | Article            | 25                          |
| 18  | Current efforts and challenges facing responses to 2019-nCoV in Africa                                                                                                                      | 0                                                                | Editorial Material | 10                          |
| 19  | Modeling the trend of coronavirus disease 2019 and restoration of operational capability of metropolitan medical service in China: a machine learning and mathematical model-based analysis | 0                                                                | Article            | 6                           |
| 20  | Where is the policy? A bibliometric analysis of the state of policy research on medical tourism                                                                                             | 1                                                                | Review             | 4                           |
| 21  | Coordinated multi-sectoral efforts needed to address the COVID-19 pandemic: lessons from China and the United States                                                                        | 0                                                                | Editorial Material | 4                           |
| 22  | Managing healthcare delivery system to fight the COVID-19 epidemic: experience in Japan                                                                                                     | 0                                                                | Editorial Material | 0                           |
| 23  | Legal reflections on the case of genome-edited babies                                                                                                                                       | 1                                                                | Editorial Material | 9                           |
| 24  | Reconstructing and forecasting the COVID-19 epidemic in the United States using a 5-parameter logistic growth model                                                                         | 0                                                                | Article            | 0                           |
| 25  | The China-UK Global Health Support Programme: looking for new roles and partnerships in changing times                                                                                      | 1                                                                | Article            | 0                           |
| 26  | Developing a framework to inform scale-up success for population health interventions: a critical interpretive synthesis of the literature (vol 5, 18, 2020)                                | 1                                                                | Correction         | 95                          |
| 27  | Social isolation and loneliness among older adults in the context of COVID-19: a global challenge                                                                                           | 0                                                                | Article            | 41                          |
| 28  | Survivors of COVID-19 are at high risk of posttraumatic stress disorder                                                                                                                     | 0                                                                | Article            | 13                          |
| 29  | Influence of population mobility on the novel coronavirus disease (COVID-19) epidemic: based on panel data from Hubei, China                                                                | 0                                                                | Article            | 0                           |
| 30  | Influence of population mobility on the novel coronavirus disease (COVID-19) epidemic: based on panel data from Hubei, China (vol 5, 30, 2020)                                              | 0                                                                | Correction         | 19                          |

| No. | Title                                                                                                                                                 | COVID-19-related publication = 0<br>non-COVID-19 publication = 1 | Document type      | Number of citations in 2021 |
|-----|-------------------------------------------------------------------------------------------------------------------------------------------------------|------------------------------------------------------------------|--------------------|-----------------------------|
| 31  | The need for COVID-19 research in low- and middle-income countries                                                                                    | 0                                                                | Editorial Material | 1                           |
| 32  | Evidence on result-based financing in maternal and child health in low- and middle-income countries: a systematic review                              | 1                                                                | Review             | 3                           |
| 33  | Engaging the communities in Wuhan, China during the COVID-19 outbreak                                                                                 | 0                                                                | Editorial Material | 8                           |
| 34  | China's model to combat the COVID-19 epidemic: a public health emergency governance approach                                                          | 0                                                                | Editorial Material | 6                           |
| 35  | Digital technology applications for contact tracing: the new promise for COVID-19 and beyond?                                                         | 0                                                                | Editorial Material | 4                           |
| 36  | Bibliometric analysis of global research output on antimicrobial resistance in the environment (2000-2019)                                            | 1                                                                | Article            | 7                           |
| 37  | Optimal control on a mathematical model to pattern the progression of coronavirus disease 2019 (COVID-19) in Indonesia                                | 0                                                                | Article            | 10                          |
| 38  | The impact of air pollution on the incidence and mortality of COVID-19                                                                                | 0                                                                | Editorial Material | 7                           |
| 39  | The impact of the COVID-19 pandemic on firms: a survey in Guangdong Province, China                                                                   | 0                                                                | Article            | 2                           |
| 40  | Timely mental health services contribute to the containment of COVID-19 pandemic in China                                                             | 0                                                                | Editorial Material | 0                           |
| 41  | Gender-specific temporal trends in overweight prevalence among Chinese adults: a hierarchical age-period-cohort analysis from 2008 to 2015            | 1                                                                | Article            | 4                           |
| 42  | First month of the epidemic caused by COVID-19 in Italy: current status and real-time outbreak development forecast                                   | 0                                                                | Article            | 1                           |
| 43  | China's global engagement to fight the novel coronavirus pandemic                                                                                     | 0                                                                | Article            | 1                           |
| 44  | The effects of the primary health care providers' prescription behavior interventions to improve the rational use of antibiotics: a systematic review | 1                                                                | Review             | 0                           |
| 45  | The potential impact of a curative intervention for HIV: a modelling study (vol 4, 18, 2019)                                                          | 1                                                                | Correction         | 2                           |
| 46  | A collaborative effort of China in combating COVID-19                                                                                                 | 0                                                                | Editorial Material | 0                           |
| 47  | Evaluation of a multidisciplinary global health online course in Mexico                                                                               | 1                                                                | Article            | 0                           |



| No. | Title                                                                                                                                                          | COVID-19-related publication = 0<br>non-COVID-19 publication = 1 | Document type | Number of citations in 2021 |
|-----|----------------------------------------------------------------------------------------------------------------------------------------------------------------|------------------------------------------------------------------|---------------|-----------------------------|
| 48  | Exploring perspectives on antimicrobial stewardship: a qualitative study of health managers in Kenya                                                           | 1                                                                | Article       | 9                           |
| 49  | Geographical distribution of hyperuricemia in mainland China: a comprehensive systematic review and meta-analysis                                              | 1                                                                | Review        | 1                           |
| 50  | The association between area of residence and sufficient antenatal tetanus vaccination in women ages 15-49 in Afghanistan: an analysis of the 2015 DHS dataset | 1                                                                | Article       | 1                           |
| 51  | Strengthening the migrant-friendliness of Thai health services through interpretation and cultural mediation: a system analysis                                | 1                                                                | Article       | 5                           |
| 52  | The epidemiological characteristics of deaths with COVID-19 in the early stage of epidemic in Wuhan, China                                                     | 0                                                                | Article       | 12                          |
| 53  | Application of artificial neural networks to predict the COVID-19 outbreak                                                                                     | 0                                                                | Article       | 0                           |
| 54  | The epidemiological characteristics of deaths with COVID-19 in the early stage of epidemic in Wuhan, China (vol 5, 54, 2020)                                   | 0                                                                | Correction    | 0                           |

**Data source:** Web of Science

**Table S9 List of articles published in *Global Health-Science and Practice* in 2020**

| No. | Title                                                                                                                                                                 | COVID-19-related publication = 0<br>non-COVID-19 publication = 1 | Document type      | Number of citations in 2021 |
|-----|-----------------------------------------------------------------------------------------------------------------------------------------------------------------------|------------------------------------------------------------------|--------------------|-----------------------------|
| 1   | A Qualitative Exploration of Community Ownership of a Maternity Waiting Home Model in Rural Zambia                                                                    | 1                                                                | Article            | 2                           |
| 2   | Coaching Intensity, Adherence to Essential Birth Practices, and Health Outcomes in the BetterBirth Trial in Uttar Pradesh, India                                      | 1                                                                | Article            | 1                           |
| 3   | A Rapid Review of Available Evidence to Inform Indicators for Routine Monitoring and Evaluation of Respectful Maternity Care                                          | 1                                                                | Review             | 1                           |
| 4   | Insights Into Provider Bias in Family Planning from a Novel Shared Decision Making Based Counseling Initiative in Rural Indigenous Guatemala                          | 1                                                                | Article            | 1                           |
| 5   | Meeting the Global Target in Reproductive, Maternal, Newborn, and Child Health Care Services in Low- and Middle-Income Countries                                      | 1                                                                | Article            | 3                           |
| 6   | Capturing Acquired Wisdom, Enabling Healthful Aging, and Building Multinational Partnerships Through Senior Global Health Mentorship                                  | 1                                                                | Editorial Material | 0                           |
| 7   | Multimonth Dispensing of Antiretroviral Therapy Protects the Most Vulnerable From 2 Pandemics at Once                                                                 | 1                                                                | Editorial Material | 5                           |
| 8   | Doing Things Differently: What It Would Take to Ensure Continued Access to Contraception During COVID-19                                                              | 0                                                                | Editorial Material | 5                           |
| 9   | Diagnostic Utility and Impact on Clinical Decision Making of Focused Assessment With Sonography for HIV-Associated Tuberculosis in Malawi: A Prospective Cohort Study | 1                                                                | Article            | 0                           |
| 10  | Effectiveness of mHealth Interventions for Improving Contraceptive Use in Low- and Middle-Income Countries: A Systematic Review                                       | 1                                                                | Review             | 2                           |
| 11  | What Makes a National Pharmaceutical Track and Trace System Succeed? Lessons From Turkey                                                                              | 1                                                                | Article            | 1                           |
| 12  | Scaling Up Access to Implants: A Summative Evaluation of the Implants Access Program                                                                                  | 1                                                                | Article            | 1                           |
| 13  | Breaking Specialty Silos: Improving Global Child Health Through Essential Surgical Care                                                                               | 1                                                                | Editorial Material | 2                           |

| No. | Title                                                                                                                                                     | COVID-19-related publication = 0<br>non-COVID-19 publication = 1 | Document type      | Number of citations in 2021 |
|-----|-----------------------------------------------------------------------------------------------------------------------------------------------------------|------------------------------------------------------------------|--------------------|-----------------------------|
| 14  | Evaluating the Implementation of an Intervention to Improve Postpartum Contraception in Tanzania: A Qualitative Study of Provider and Client Perspectives | 1                                                                | Article            | 2                           |
| 15  | Prevention of COVID-19 in Internally Displaced Persons Camps in War-Torn North Kivu, Democratic Republic of the Congo: A Mixed-Methods Study              | 0                                                                | Article            | 2                           |
| 16  | Matching Development of Point-of-Care Diagnostic Tests to the Local Context: A Case Study of Visceral Leishmaniasis in Kenya and Uganda                   | 1                                                                | Article            | 1                           |
| 17  | The Critical Role and Evaluation of Community Mobilizers in Polio Eradication in Remote Settings in Africa and Asia                                       | 1                                                                | Article            | 3                           |
| 18  | Implementation and Scale-Up of the Standard Days Method of Family Planning: A Landscape Analysis                                                          | 1                                                                | Review             | 1                           |
| 19  | Juntos: A Support Program for Families Impacted by Congenital Zika Syndrome in Brazil                                                                     | 1                                                                | Article            | 0                           |
| 20  | Recall Efforts Successfully Increase Follow-Up for Cervical Cancer Screening Among Women With Human Papillomavirus in Honduras                            | 1                                                                | Article            | 1                           |
| 21  | A Qualitative Assessment of Provider and Client Experiences With 3- and 6-Month Dispensing Intervals of Antiretroviral Therapy in Malawi                  | 1                                                                | Article            | 9                           |
| 22  | Where Do Caregivers Take Their Sick Children for Care? An Analysis of Care Seeking and Equity in 24 USAID Priority Countries                              | 1                                                                | Article            | 3                           |
| 23  | Mask Reuse in the COVID-19 Pandemic: Creating an Inexpensive and Scalable Ultraviolet System for Filtering Facepiece Respirator Decontamination           | 0                                                                | Article            | 8                           |
| 24  | Contraception in the Era of COVID-19                                                                                                                      | 0                                                                | Editorial Material | 14                          |
| 25  | Institutionalization of Projects Into Districts in Low- and Middle-Income Countries Needs Stewardship, Autonomy, and Resources                            | 1                                                                | Editorial Material | 3                           |
| 26  | What Goes In Must Come Out: A Mixed-Method Study of Access to Contraceptive Implant Removal Services in Ghana                                             | 1                                                                | Article            | 1                           |

| No. | Title                                                                                                                                                                                     | COVID-19-related publication = 0<br>non-COVID-19 publication = 1 | Document type      | Number of citations in 2021 |
|-----|-------------------------------------------------------------------------------------------------------------------------------------------------------------------------------------------|------------------------------------------------------------------|--------------------|-----------------------------|
| 27  | Costing Analysis of a Pilot Community Health Worker Program in Rural Nepal                                                                                                                | 1                                                                | Article            | 0                           |
| 28  | Beyond No Blame: Practical Challenges of Conducting Maternal and Perinatal Death Reviews in Eastern Ethiopia                                                                              | 1                                                                | Editorial Material | 0                           |
| 29  | A Practical Guide to Using Time-and-Motion Methods to Monitor Compliance With Hand Hygiene Guidelines: Experience From Tanzanian Labor Wards                                              | 1                                                                | Article            | 0                           |
| 30  | Integrating Calcium Into Antenatal Iron-Folic Acid Supplementation in Ethiopia: Women's Experiences, Perceptions of Acceptability, and Strategies to Support Calcium Supplement Adherence | 1                                                                | Article            | 1                           |
| 31  | Top 10 Resources in Global Surgery                                                                                                                                                        | 1                                                                | Article            | 1                           |
| 32  | Ebola: A Hyperinflated Emergency                                                                                                                                                          | 1                                                                | Editorial Material | 0                           |
| 33  | Unmet Need for Family Planning and Experience of Unintended Pregnancy Among Female Sex Workers in Urban Cameroon: Results From a National Cross-Sectional Study                           | 1                                                                | Article            | 2                           |
| 34  | A Rapid Cost Modeling Tool for Evaluating and Improving Public Health Supply Chain Designs                                                                                                | 1                                                                | Article            | 0                           |
| 35  | Implementation of a Pediatric Early Warning Score to Improve Communication and Nursing Empowerment in a Rural District Hospital in Rwanda                                                 | 1                                                                | Article            | 1                           |
| 36  | Determinants of Facility-Level Use of Electronic Immunization Registries in Tanzania and Zambia: An Observational Analysis                                                                | 1                                                                | Article            | 0                           |
| 37  | Factors That Influence Data Use to Improve Health Service Delivery in Low- and Middle-Income Countries                                                                                    | 1                                                                | Review             | 2                           |
| 38  | Counseling Is a Relationship Not Just a Skill: Re-conceptualizing Health Behavior Change Communication by India's Accredited Social Health Activists                                      | 1                                                                | Editorial Material | 0                           |
| 39  | Behavioral Insights Into Micronutrient Powder Use for Childhood Anemia in Arequipa, Peru                                                                                                  | 1                                                                | Article            | 0                           |
| 40  | Factors Associated With Delayed Contraceptive Implant Removal in Ethiopia                                                                                                                 | 1                                                                | Article            | 0                           |
| 41  | Designing and Evaluating Scalable Child Marriage Prevention Programs in Burkina Faso and Tanzania: A                                                                                      | 1                                                                | Article            | 2                           |

| No. | Title                                                                                                                                               | COVID-19-related publication = 0<br>non-COVID-19 publication = 1 | Document type      | Number of citations in 2021 |
|-----|-----------------------------------------------------------------------------------------------------------------------------------------------------|------------------------------------------------------------------|--------------------|-----------------------------|
|     | Quasi-Experiment and Costing Study                                                                                                                  |                                                                  |                    |                             |
| 42  | Effects of a Community-Based Program on Voluntary Modern Contraceptive Uptake Among Young First-Time Parents in Cross River State, Nigeria          | 1                                                                | Article            | 0                           |
| 43  | Close to Home: Evidence on the Impact of Community-Based Girl Groups                                                                                | 1                                                                | Review             | 3                           |
| 44  | Routine Family Planning Data in the Low- and Middle-Income Country Context: A Synthesis of Findings From 17 Small Research Grants                   | 1                                                                | Review             | 0                           |
| 45  | Bringing Greater Precision to Interactions Between Community Health Workers and Households to Improve Maternal and Newborn Health Outcomes in India | 1                                                                | Article            | 6                           |
| 46  | Will the Higher-Income Country Blueprint for COVID-19 Work in Low- and Lower Middle-Income Countries?                                               | 0                                                                | Editorial Material | 10                          |
| 47  | Practical Implications of Policy Guidelines: A GIS Model of the Deployment of Community Health Volunteers in Madagascar                             | 1                                                                | Article            | 2                           |
| 48  | Are We Using the Right Approach to Change Newborn Care Practices in the Community? Qualitative Evidence From Ethiopia and Northern Nigeria          | 1                                                                | Article            | 2                           |
| 49  | What Is Global Health: Science and Practice Doing to Address Power Imbalances in Publishing?                                                        | 1                                                                | Editorial Material | 2                           |
| 50  | Measuring Service Quality and Assessing Its Relationship to Contraceptive Discontinuation: A Prospective Cohort Study in Pakistan and Uganda        | 1                                                                | Article            | 2                           |
| 51  | Coping With COVID-19: Learning From Past Pandemics to Avoid Pitfalls and Panic (vol 8, pg 155, 2020)                                                | 0                                                                | Correction         | 0                           |
| 52  | Using Community Health Workers and a Smartphone Application to Improve Diabetes Control in Rural Guatemala                                          | 1                                                                | Article            | 1                           |
| 53  | Impact of Improved Biomass and Liquid Petroleum Gas Stoves on Birth Outcomes in Rural Nepal: Results of 2 Randomized Trials                         | 1                                                                | Article            | 8                           |
| 54  | National Surgical, Obstetric, and Anesthesia Plans Supporting the Vision of Universal Health Coverage                                               | 1                                                                | Article            | 5                           |

| No. | Title                                                                                                                                              | COVID-19-related publication = 0<br>non-COVID-19 publication = 1 | Document type      | Number of citations in 2021 |
|-----|----------------------------------------------------------------------------------------------------------------------------------------------------|------------------------------------------------------------------|--------------------|-----------------------------|
| 55  | A Cluster-Randomized Trial to Test Sharing Histories as a Training Method for Community Health Workers in Peru                                     | 1                                                                | Article            | 1                           |
| 56  | Go Where the Virus Is: An HIV Micro-epidemic Control Approach to Stop HIV Transmission                                                             | 1                                                                | Editorial Material | 0                           |
| 57  | Opportunities and Challenges of Delivering Postabortion Care and Postpartum Family Planning During the COVID-19 Pandemic                           | 0                                                                | Editorial Material | 5                           |
| 58  | How Should Home-Based Maternal and Child Health Records Be Implemented? A Global Framework Analysis                                                | 1                                                                | Article            | 3                           |
| 59  | Contraceptive Method Mix: Updates and Implications                                                                                                 | 1                                                                | Article            | 5                           |
| 60  | Lessons Learned From Implementing Prospective, Multicountry Mixed-Methods Evaluations for Gavi and the Global Fund                                 | 1                                                                | Article            | 0                           |
| 61  | Learning from Community Health Worker Programs, Big and Small                                                                                      | 1                                                                | Editorial Material | 2                           |
| 62  | Community Ownership in Primary Health Care-Managing the Intangible                                                                                 | 1                                                                | Editorial Material | 2                           |
| 63  | Private Providers' Experiences Implementing a Package of Interventions to Improve Quality of Care in Kenya: Findings From a Qualitative Evaluation | 1                                                                | Article            | 1                           |
| 64  | Learning From Neighbors                                                                                                                            | 1                                                                | Editorial Material | 0                           |
| 65  | A Qualitative Comparative Analysis of the Drivers of HIV Status Knowledge in Orphans and Vulnerable Children in Mozambique                         | 1                                                                | Article            | 0                           |
| 66  | The All Babies Count Initiative: Impact of a Health System Improvement Approach on Neonatal Care and Outcomes in Rwanda                            | 1                                                                | Article            | 3                           |
| 67  | Coping With COVID-19: Learning From Past Pandemics to Avoid Pitfalls and Panic                                                                     | 0                                                                | Editorial Material | 9                           |
| 68  | Improving Hospital Oxygen Systems for COVID-19 in Low-Resource Settings: Lessons From the Field                                                    | 0                                                                | Article            | 9                           |
| 69  | Implementing the Clean Clinic Approach Improves Water, Sanitation, and Hygiene Quality in Health Facilities in the Western Highlands of Guatemala  | 1                                                                | Article            | 0                           |

| No. | Title                                                                                                                                                           | COVID-19-related publication = 0<br>non-COVID-19 publication = 1 | Document type | Number of citations in 2021 |
|-----|-----------------------------------------------------------------------------------------------------------------------------------------------------------------|------------------------------------------------------------------|---------------|-----------------------------|
| 70  | District Health Teams' Readiness to Institutionalize Integrated Community Case Management in the Uganda Local Health Systems: A Repeated Qualitative Study      | 1                                                                | Article       | 2                           |
| 71  | Remote Mentorship Using Video Conferencing as an Effective Tool to Strengthen Laboratory Quality Management in Clinical Laboratories: Lessons From Cambodia     | 1                                                                | Article       | 2                           |
| 72  | What Makes a National Pharmaceutical Track and Trace Succeed? Lessons From Turkey (vol 8, pg 863, 2020)                                                         | 1                                                                | Correction    | 0                           |
| 73  | Using Patient-Reported Outcome Measures to Promote Patient-Centered Practice: Building Capacity Among Pediatric Physiotherapists in Rwanda                      | 1                                                                | Article       | 0                           |
| 74  | Health Care Worker Preferences and Perspectives on Doses per Container for 2 Lyophilized Vaccines in Senegal, Vietnam, and Zambia                               | 1                                                                | Article       | 2                           |
| 75  | Two-Way Short Message Service (SMS) Communication May Increase Pre-Exposure Prophylaxis Continuation and Adherence Among Pregnant and Postpartum Women in Kenya | 1                                                                | Article       | 4                           |

**Data source:** Web of Science

**Table S10 List of articles published in *Global Mental Health* in 2020**

| No. | Title                                                                                                                                                                                                              | COVID-19-related publication = 0<br>non-COVID-19 publication = 1 | Document type      | Number of citations in 2021 |
|-----|--------------------------------------------------------------------------------------------------------------------------------------------------------------------------------------------------------------------|------------------------------------------------------------------|--------------------|-----------------------------|
| 1   | Acceptability and feasibility of using actigraphy to assess habitual physical activity and sleep parameters in men and women living in rural communities in conflict-affected Eastern Democratic Republic of Congo | 1                                                                | Article            | 0                           |
| 2   | Barriers and facilitators of child and guardian attendance in task-shifted mental health services in schools in western Kenya                                                                                      | 1                                                                | Article            | 0                           |
| 3   | Building a strategic educator-psychiatrist alliance to support the mental health of students during the outbreak of COVID-19 in China                                                                              | 0                                                                | Editorial Material | 1                           |
| 4   | Caregiving burden and mental health problems among family caregivers of people with dementia in rural Uganda                                                                                                       | 1                                                                | Article            | 3                           |
| 5   | Changes in prevalence of mental disorders among internally displaced persons in central Sudan: a 1-year follow-up study                                                                                            | 1                                                                | Article            | 0                           |
| 6   | Contextualizing and pilot testing the Mental Health Gap Action Programme Intervention Guide (mhGAP-IG) to primary healthcare workers in Kilifi, Kenya                                                              | 1                                                                | Article            | 2                           |
| 7   | Depression among TB patients and associated factors in Kathmandu Valley, Nepal                                                                                                                                     | 1                                                                | Article            | 0                           |
| 8   | Development of a comprehensive, sustained community mental health system in post-earthquake Haiti, 2010-2019                                                                                                       | 1                                                                | Article            | 4                           |
| 9   | Disability, violence, and mental health among Somali refugee women in a humanitarian setting                                                                                                                       | 1                                                                | Article            | 1                           |
| 10  | Effectiveness of a peer-led adolescent mental health intervention on HIV virological suppression and mental health in Zimbabwe: protocol of a cluster-randomised trial                                             | 1                                                                | Article            | 3                           |
| 11  | Expressions of psychological distress in Sierra Leone: implications for community-based prevention and response                                                                                                    | 1                                                                | Article            | 3                           |
| 12  | Factors influencing medical students and psychiatry residents in Ghana to consider psychiatry as a career option - a qualitative study                                                                             | 1                                                                | Article            | 0                           |
| 13  | Impact of pandemic on mental health in lower- and middle-income countries (LMICs)                                                                                                                                  | 1                                                                | Editorial Material | 1                           |



| No. | Title                                                                                                                                                                                                                           | COVID-19-related publication = 0<br>non-COVID-19 publication = 1 | Document type      | Number of citations in 2021 |
|-----|---------------------------------------------------------------------------------------------------------------------------------------------------------------------------------------------------------------------------------|------------------------------------------------------------------|--------------------|-----------------------------|
| 14  | Implementation outcomes and strategies for depression interventions in low- and middle-income countries: a systematic review                                                                                                    | 1                                                                | Review             | 7                           |
| 15  | Incidence of depression in people with newly diagnosed tuberculosis in Ethiopia: a cohort study                                                                                                                                 | 1                                                                | Article            | 0                           |
| 16  | Interpersonal violence and mental health: a social justice framework to advance research and practice                                                                                                                           | 1                                                                | Editorial Material | 4                           |
| 17  | 'Jack be nimble, Jack be quick horizontal ellipsis ': mental health and psychosocial response in the time of coronavirus                                                                                                        | 1                                                                | Editorial Material | 1                           |
| 18  | Justice for George Floyd and a reckoning for global mental health                                                                                                                                                               | 1                                                                | Article            | 10                          |
| 19  | Justice for George Floyd and a reckoning for global mental health                                                                                                                                                               | 1                                                                | Correction         | 10                          |
| 20  | Law enforcement and mental health clinician partnerships in global mental health: outcomes for the Crisis Intervention Team (CIT) model adaptation in Liberia, West Africa                                                      | 1                                                                | Article            | 0                           |
| 21  | Measuring functional disability in children with developmental disorders in low-resource settings: validation of Developmental Disorders-Children Disability Assessment Schedule (DD-CDAS) in rural Pakistan                    | 1                                                                | Article            | 3                           |
| 22  | Measuring functional disability in children with developmental disorders in low-resource settings: validation of Developmental Disorders-Children Disability Assessment Schedule (DD-CDAS) in rural Pakistan (vol 7, E17, 2020) | 1                                                                | Correction         | 0                           |
| 23  | Measuring mental health and well-being of South African undergraduate students                                                                                                                                                  | 1                                                                | Article            | 4                           |
| 24  | Mental health disorders and utilization of mental healthcare services in United Nations personnel                                                                                                                               | 1                                                                | Article            | 1                           |
| 25  | Mental health research capacity building in sub-Saharan Africa: the African Mental Health Research Initiative                                                                                                                   | 1                                                                | Editorial Material | 3                           |
| 26  | Pandemic anxiety and its correlates among young doctors working frontline in Pakistan                                                                                                                                           | 1                                                                | Article            | 4                           |
| 27  | Patient-level predictors of detection of depressive symptoms, referral, and uptake of depression counseling among chronic care patients in KwaZulu-Natal, South Africa                                                          | 1                                                                | Article            | 1                           |
| 28  | Philanthropy for global mental health 2000-2015                                                                                                                                                                                 | 1                                                                | Article            | 3                           |
| 29  | Strengthening parenting in conflict-affected communities: development of the Caregiver Support Intervention                                                                                                                     | 1                                                                | Article            | 5                           |

| No. | Title                                                                                                                              | COVID-19-related publication = 0<br>non-COVID-19 publication = 1 | Document type      | Number of citations in 2021 |
|-----|------------------------------------------------------------------------------------------------------------------------------------|------------------------------------------------------------------|--------------------|-----------------------------|
| 30  | Suicide on Facebook-the tales of unnoticed departure in Bangladesh                                                                 | 1                                                                | Article            | 2                           |
| 31  | The impact of leprosy on the mental wellbeing of leprosy-affected persons and their family members - a systematic review           | 1                                                                | Review             | 4                           |
| 32  | The need to shift to a contextualized and collective mental health paradigm: learning from crisis-hit Lebanon                      | 1                                                                | Editorial Material | 3                           |
| 33  | The prevalence of mental health problems in sub-Saharan adolescents living with HIV: a systematic review                           | 1                                                                | Review             | 8                           |
| 34  | The treatment of mental illness in faith-based and traditional healing centres in Ghana: perspectives of service users and healers | 1                                                                | Article            | 0                           |
| 35  | When less is more: reducing redundancy in mental health and psychosocial instruments using Item Response Theory                    | 1                                                                | Article            | 2                           |

**Data source:** Web of Science

**Table S11 List of articles published in *Global Public Health* in 2020**

| No. | Title                                                                                                                                                           | COVID-19-related publication = 0<br>non-COVID-19 publication = 1 | Document type | Number of citations in 2021 |
|-----|-----------------------------------------------------------------------------------------------------------------------------------------------------------------|------------------------------------------------------------------|---------------|-----------------------------|
| 1   | ART uptake and adherence among female sex workers (FSW) globally: A scoping review                                                                              | 1                                                                | Review        | 1                           |
| 2   | Linking HIV-positive people in addiction care to HIV services in St. Petersburg, Russia - Mixed-methods implementation study of strengths-based case management | 1                                                                | Article       | 0                           |
| 3   | Reproductive healthcare for women in IDP camps in Nigeria: An analysis of structural gaps                                                                       | 1                                                                | Article       | 1                           |
| 4   | A systematic review and meta-analysis of dementia prevalence in seven developing countries: A STRiDE project                                                    | 1                                                                | Review        | 9                           |
| 5   | Examining the evidence of microfinance on non-communicable disease health indicators and outcomes: A systematic literature review                               | 1                                                                | Review        | 0                           |
| 6   | Queer necropolitics of asylum: Senegalese refugees facing HIV in Mauritania                                                                                     | 1                                                                | Article       | 2                           |
| 7   | Impacts of the Global Gag Rule on sexual and reproductive health and rights in the Global South: A scoping review                                               | 1                                                                | Review        | 1                           |
| 8   | When marriage is the best available option: Perceptions of opportunity and risk in female adolescence in Tanzania                                               | 1                                                                | Article       | 2                           |
| 9   | Exploring the impact of COVID-19 pandemic lockdown on informal settlements in Tshwane Gauteng Province, South Africa                                            | 0                                                                | Article       | 7                           |
| 10  | The world expects effective global health interventions: Can global health deliver?                                                                             | 1                                                                | Article       | 1                           |
| 11  | 'I guess we have to treat them, but horizontal ellipsis ': health care provider perspectives on management of women presenting with unsafe abortion in Botswana | 1                                                                | Article       | 0                           |
| 12  | Cultural adaptation and validation of a measure of prejudice against men who have sex with men among healthcare providers in western Kenya                      | 1                                                                | Article       | 1                           |
| 13  | Private sector healthcare in Bangladesh: Implications for social justice and the right to healthcare                                                            | 1                                                                | Article       | 1                           |
| 14  | A scoping review of sexual transmission related HIV research among key populations in Malaysia: Implications for interventions across the HIV care cascade      | 1                                                                | Review        | 2                           |

| No. | Title                                                                                                                                                                     | COVID-19-related publication = 0<br>non-COVID-19 publication = 1 | Document type | Number of citations in 2021 |
|-----|---------------------------------------------------------------------------------------------------------------------------------------------------------------------------|------------------------------------------------------------------|---------------|-----------------------------|
| 15  | Structural inequities, HIV vulnerability and women's agency: Street-based sex workers in Nigeria                                                                          | 1                                                                | Article       | 3                           |
| 16  | The comparative politics of COVID-19: The need to understand government responses                                                                                         | 0                                                                | Article       | 60                          |
| 17  | Whither syndemics?: Trends in syndemics research, a review 2015-2019                                                                                                      | 1                                                                | Review        | 18                          |
| 18  | The relationship between intimate partner violence and probable depression among adolescent girls and young women in Lilongwe, Malawi                                     | 1                                                                | Article       | 0                           |
| 19  | Complexities in the process of translating research documents in cross-cultural settings                                                                                  | 1                                                                | Article       | 1                           |
| 20  | The Brazilian cash transfer program (Bolsa Familia): A tool for reducing inequalities and achieving social rights in Brazil                                               | 1                                                                | Article       | 6                           |
| 21  | Sociocultural, behavioural and political factors shaping the COVID-19 pandemic: the need for a biocultural approach to understanding pandemics and (re)emerging pathogens | 0                                                                | Article       | 7                           |
| 22  | Does health service utilisation mediate the effect of disability on psychological distress: Evidence from a national representative survey in Australia                   | 1                                                                | Article       | 2                           |
| 23  | 'Most importantly, I hope God keeps illness away from us': The context and challenges surrounding access to health care for Syrian refugees in Lebanon                    | 1                                                                | Article       | 0                           |
| 24  | Medicines in Western Sahara Refugee Camps in Tindouf: Prescriptions and self-medication mixing in the drawer                                                              | 1                                                                | Article       | 1                           |
| 25  | Understanding kidney disease in rural central Uganda - Findings from a qualitative study                                                                                  | 1                                                                | Article       | 1                           |
| 26  | A critical comparative ethnographic study of courtesy stigma in two leprosy-impacted communities in Indonesia                                                             | 1                                                                | Article       | 0                           |
| 27  | Sword and Shield: Perceptions of law in empowering and protecting HIV-positive men who have sex with men in Manila, Philippines                                           | 1                                                                | Article       | 1                           |
| 28  | Women's business? A social network study of the influence of men on decision-making regarding female genital mutilation/cutting in Senegal                                | 1                                                                | Article       | 1                           |

| No. | Title                                                                                                                                                                                              | COVID-19-related publication = 0<br>non-COVID-19 publication = 1 | Document type | Number of citations in 2021 |
|-----|----------------------------------------------------------------------------------------------------------------------------------------------------------------------------------------------------|------------------------------------------------------------------|---------------|-----------------------------|
| 29  | Investigating the implementation of differentiated HIV services and implications for pregnant and postpartum women: A mixed methods multi-country study                                            | 1                                                                | Article       | 0                           |
| 30  | Structural competency and global health education                                                                                                                                                  | 1                                                                | Article       | 3                           |
| 31  | The end of AIDS? HIV and the new landscape of illness in rural South Africa                                                                                                                        | 1                                                                | Article       | 4                           |
| 32  | Experiences of minority stress among gay, bisexual, and other men who have sex with men (GBMSM) in Nigeria, Africa: The intersection of mental health, substance use, and HIV sexual risk behavior | 1                                                                | Article       | 4                           |
| 33  | Understanding the capacity of community-based groups to mobilise and engage in social action for health: Results from Avahan                                                                       | 1                                                                | Article       | 0                           |
| 34  | Association between gender disadvantage factors and postnatal psychological distress among young women: A community-based study in rural India                                                     | 1                                                                | Review        | 2                           |
| 35  | Signs and strategies to deal with food insecurity and consumption of ultra-processed foods among Amazonian mothers                                                                                 | 1                                                                | Article       | 2                           |
| 36  | BARRIERS Preventing Access by Men who have Sex with Men to HIV-related health services in SOUTHEAST Asia: A Scoping Review                                                                         | 1                                                                | Review        | 0                           |
| 37  | A qualitative examination of alcohol use and IPV among Nepali couples in a violence prevention intervention                                                                                        | 1                                                                | Article       | 0                           |
| 38  | A rights-based approach to public health emergencies: The case of the 'More Rights, Less Zika' campaign in Brazil                                                                                  | 1                                                                | Article       | 2                           |
| 39  | Response to the comments on 'A systematic review and meta-analysis of dementia prevalence in seven developing countries: A STRiDE project'                                                         | 1                                                                | Letter        | 0                           |
| 40  | Undercounting of suicides: Where suicide data lie hidden                                                                                                                                           | 1                                                                | Article       | 6                           |
| 41  | Suicide behaviour among adolescents in a high HIV prevalence region of western Kenya: A mixed-methods study                                                                                        | 1                                                                | Article       | 2                           |
| 42  | Stigmatisation of alcohol use among people receiving antiretroviral therapy for HIV infection, Cape Town, South Africa                                                                             | 1                                                                | Article       | 5                           |

| No. | Title                                                                                                                                           | COVID-19-related publication = 0<br>non-COVID-19 publication = 1 | Document type      | Number of citations in 2021 |
|-----|-------------------------------------------------------------------------------------------------------------------------------------------------|------------------------------------------------------------------|--------------------|-----------------------------|
| 43  | 'To minimise that risk, there are some costs we incur': Examining the impact of gender-based violence on the urban poor                         | 1                                                                | Article            | 0                           |
| 44  | Community health worker home visiting in deeply rural South Africa: 12-month outcomes                                                           | 1                                                                | Article            | 0                           |
| 45  | 'Our life is pointless ... ': Exploring discrimination, violence and mental health challenges among sexual and gender minorities from Brazil    | 1                                                                | Article            | 2                           |
| 46  | Hepatitis C incidence and prevalence among Puerto Rican people who use drugs in New York City                                                   | 1                                                                | Article            | 5                           |
| 47  | Beyond the talking imperative: The value of silence on sexuality in youth-parent relations in Bangladesh                                        | 1                                                                | Article            | 3                           |
| 48  | Women's work at end of life: The intersecting gendered vulnerabilities of patients and caregivers in rural Malawi                               | 1                                                                | Article            | 2                           |
| 49  | A cohort study to assess a communication intervention to improve linkage to HIV care in Nakivale Refugee Settlement, Uganda                     | 1                                                                | Article            | 0                           |
| 50  | Perceptions of chronic kidney disease among at-risk adults in rural Guatemala                                                                   | 1                                                                | Article            | 0                           |
| 51  | Challenges and needs for social behavioural research and community engagement activities during the COVID-19 pandemic in rural Mozambique       | 0                                                                | Editorial Material | 3                           |
| 52  | Non-partner sexual violence experience and toilet type amongst young (18-24) women in South Africa: A population-based cross-sectional analysis | 1                                                                | Article            | 1                           |
| 53  | Knowledge and misconceptions surrounding family planning among Young Maasai women in Kenya                                                      | 1                                                                | Article            | 0                           |
| 54  | Lessons from a Canada-China cross-national qualitative suicide research collaboration                                                           | 1                                                                | Article            | 1                           |
| 55  | Men and COVID-19: Adding a gender lens                                                                                                          | 0                                                                | Editorial Material | 13                          |
| 56  | The impact of psychosocial interventions on condom and contraceptive use in LMICs: Meta-analysis of randomised controlled trials                | 1                                                                | Article            | 2                           |
| 57  | There's no such thing as a free TB diagnosis: Catastrophic TB costs in Urban Uganda                                                             | 1                                                                | Article            | 4                           |

| No. | Title                                                                                                                                                                       | COVID-19-related publication = 0<br>non-COVID-19 publication = 1 | Document type         | Number of citations in 2021 |
|-----|-----------------------------------------------------------------------------------------------------------------------------------------------------------------------------|------------------------------------------------------------------|-----------------------|-----------------------------|
| 58  | Implementation and evaluation of a culturally grounded group-based HIV prevention programme for men who have sex with men in Ghana                                          | 1                                                                | Article               | 3                           |
| 59  | Maternal and neonatal service delivery by traditional birth attendants in rural Benin: A case for integration?                                                              | 1                                                                | Article               | 1                           |
| 60  | Health systems responsiveness among older adults: Findings from the World Health Organization Study on global AGEing and adult health                                       | 1                                                                | Article               | 1                           |
| 61  | Disability status and violence against women in the home in North Kivu, Democratic Republic of Congo                                                                        | 1                                                                | Article               | 0                           |
| 62  | Beyond biomedical and comorbidity approaches: Exploring associations between affinity group membership, health and health seeking behaviour among MSM/MSW in Nairobi, Kenya | 1                                                                | Article               | 0                           |
| 63  | Understanding family-based health insurance enrolment among informal sector workers in a rural district of Vietnam: Adverse selection and key determinants                  | 1                                                                | Article               | 0                           |
| 64  | 'The last line of marketing': Covert tobacco marketing tactics as revealed by former tobacco industry employees                                                             | 1                                                                | Article               | 1                           |
| 65  | Travel restrictions as a disease control measure: Lessons from yellow fever                                                                                                 | 1                                                                | Article               | 4                           |
| 66  | Care seeking and treatment for hepatitis C infection in Rwanda: A qualitative study of patient experiences                                                                  | 1                                                                | Article               | 0                           |
| 67  | Understanding risk perception from traditional knowledge of Mayan farmers on Rickettsioses                                                                                  | 1                                                                | Article               | 0                           |
| 68  | Health system's response to the COVID-19 pandemic in conflict settings: Policy reflections from Palestine                                                                   | 0                                                                | Editorial Material    | 19                          |
| 69  | Attitudes toward tobacco cessation and lung cancer screening in two South African communities                                                                               | 1                                                                | Article               | 0                           |
| 70  | The collective power of women's organisations in Chuuk, FSM                                                                                                                 | 1                                                                | Article               | 1                           |
| 71  | Training lay counsellors in public health: Considerations for social workers, professional counsellors and psychologists                                                    | 1                                                                | Editorial Material    | 2                           |
| 72  | Childhood malnutrition within the indigenous Wayuu children of northern Colombia                                                                                            | 1                                                                | Article; Early Access | 3                           |
| 73  | Effective supervision of doctoral students in public and population health in Africa: CARTA supervisors' experiences,                                                       | 1                                                                | Article               | 0                           |

| No. | Title                                                                                                                                                                 | COVID-19-related publication = 0<br>non-COVID-19 publication = 1 | Document type        | Number of citations in 2021 |
|-----|-----------------------------------------------------------------------------------------------------------------------------------------------------------------------|------------------------------------------------------------------|----------------------|-----------------------------|
|     | challenges and perceived opportunities                                                                                                                                |                                                                  |                      |                             |
| 74  | Methadone maintenance treatment in Ho Chi Minh City, Vietnam: Multidimensional measure of adherence and associated factors                                            | 1                                                                | Article              | 0                           |
| 75  | Understanding the health systems impacts of Universal Test and Treat in sub-Saharan Africa: The Shape UTT study                                                       | 1                                                                | Editorial Material   | 0                           |
| 76  | COVID-19 vaccines and treatments nationalism: Challenges for low-income countries and the attainment of the SDGs                                                      | 0                                                                | Article              | 31                          |
| 77  | The Influence of Organised Diffusion on Social Norms Change: Addressing Intimate Partner Violence in Nepal                                                            | 1                                                                | Article              | 0                           |
| 78  | Balancing professional autonomy and authority at the margins of a fragile state: Front-line health workers' experiences in Burkina Faso                               | 1                                                                | Article              | 0                           |
| 79  | Requests for medication abortion support in Brazil during and after the Zika epidemic                                                                                 | 1                                                                | Article              | 0                           |
| 80  | Sexual transmission of Zika virus on Twitter: A depoliticised epidemic                                                                                                | 1                                                                | Article              | 0                           |
| 81  | Promoting male circumcision as HIV prevention in sub-Saharan Africa: An evaluation of the ethical and pragmatic considerations of adopting a demand creation approach | 1                                                                | Article              | 4                           |
| 82  | Behavioural barriers and perceived trade-offs to care-seeking for tuberculosis in the Philippines                                                                     | 1                                                                | Article              | 0                           |
| 83  | Hidden healthcare populations: using intersectionality to theorise the experiences of LGBT plus people in Nigeria, Africa                                             | 1                                                                | Article              | 0                           |
| 84  | Anxious depression in patients with Type 2 Diabetes Mellitus and its relationship with medication adherence and glycaemic control                                     | 1                                                                | Article              | 2                           |
| 85  | Pesticide exposure and risk of cardiovascular disease: A systematic review                                                                                            | 1                                                                | Review; Early Access | 3                           |
| 86  | A situation analysis of the state of supply of in vitro diagnostics in Low-Income Countries                                                                           | 1                                                                | Article              | 1                           |



| No. | Title                                                                                                                                                   | COVID-19-related publication = 0<br>non-COVID-19 publication = 1 | Document type         | Number of citations in 2021 |
|-----|---------------------------------------------------------------------------------------------------------------------------------------------------------|------------------------------------------------------------------|-----------------------|-----------------------------|
| 87  | Intimate partner violence and postpartum emotional distress among South African women: Moderating effects of resilience and vulnerability factors       | 1                                                                | Article               | 0                           |
| 88  | Cost variations in prevention of mother-to-child HIV transmission services integrated within maternal and child health services in rural Tanzania       | 1                                                                | Article               | 0                           |
| 89  | 'If the results are negative, they motivate us'. Experiences of early infant diagnosis of HIV and engagement in Option B                                | 1                                                                | Article               | 1                           |
| 90  | Enhancing agency for health providers and pregnant women experiencing intimate partner violence in South Africa                                         | 1                                                                | Article               | 1                           |
| 91  | Protecting health during COVID-19 and beyond: A global examination of paid sick leave design in 193 countries*                                          | 0                                                                | Article               | 13                          |
| 92  | Implementing a One Health village volunteer programme in West Sulawesi, Indonesia: A pilot study                                                        | 1                                                                | Article               | 0                           |
| 93  | Exploring decision makers' knowledge, attitudes and practices about decentralisation and health resources transfer to local governments in Burkina Faso | 1                                                                | Article; Early Access | 0                           |
| 94  | Appraising and addressing design and implementation failure in global health: A pragmatic framework                                                     | 1                                                                | Editorial Material    | 2                           |
| 95  | A comparison of health indicators and social determinants of health between Israel and the Occupied Palestinian Territories                             | 1                                                                | Article               | 1                           |
| 96  | How far do parenting programmes help change norms underpinning violence against adolescents? Evidence from low and middle-income countries              | 1                                                                | Article               | 3                           |
| 97  | In the shadow of HIV & TB: A commentary on the COVID epidemic in South Africa                                                                           | 0                                                                | Editorial Material    | 14                          |
| 98  | Investigating global mental health: Contributions from political science                                                                                | 1                                                                | Article               | 1                           |
| 99  | Crisis management in authoritarian regimes: A comparative study of COVID-19 responses in Turkey and Iran                                                | 0                                                                | Article               | 4                           |
| 100 | Women's political empowerment and child health in the sustainable development era: A global empirical analysis (1990-2016)                              | 1                                                                | Article; Early Access | 2                           |
| 101 | The global politics of the age-gender divide in violence against women and children                                                                     | 1                                                                | Article               | 1                           |

| No. | Title                                                                                                                                                        | COVID-19-related publication = 0<br>non-COVID-19 publication = 1 | Document type      | Number of citations in 2021 |
|-----|--------------------------------------------------------------------------------------------------------------------------------------------------------------|------------------------------------------------------------------|--------------------|-----------------------------|
| 102 | Is expanding service through an outreach programme enough to improve immunisation uptake? A qualitative study in Indonesia                                   | 1                                                                | Article            | 3                           |
| 103 | Global health research became the norm: A response to 'what happened to the global forum for health research?'                                               | 1                                                                | Editorial Material | 0                           |
| 104 | Assessing the implementation of facility-based HIV testing policies in Malawi, South Africa and Tanzania from 2013-2018: Findings from SHAPE-UTT study       | 1                                                                | Article            | 1                           |
| 105 | Depression and coping strategies among Vietnamese women living with HIV: A qualitative study                                                                 | 1                                                                | Article            | 0                           |
| 106 | The Ashodaya PrEP project: Lessons and implications for scaling up PrEP from a community-led demonstration project among female sex workers in Mysore, India | 1                                                                | Article            | 5                           |
| 107 | Adaptation and biomedical transition of people living with HIV to antiretroviral treatment in Burkina Faso                                                   | 1                                                                | Article            | 1                           |
| 108 | A systematic review and meta-analysis assessing the impact of droughts, flooding, and climate variability on malnutrition                                    | 1                                                                | Review             | 3                           |
| 109 | Antimicrobial overuse in India: A symptom of broader societal issues including resource limitations and financial pressures                                  | 1                                                                | Article            | 1                           |
| 110 | Country-level factors associated with the early spread of COVID-19 cases at 5, 10 and 15 days since the onset                                                | 0                                                                | Article            | 13                          |
| 111 | Acceptability of the human papillomavirus vaccine in schools in Lusaka in Zambia: Role of community and formal health system factors                         | 1                                                                | Article            | 0                           |
| 112 | Assessing oral health of crack users in Brazil: Perceptions and associated factors, findings from a mixed methods study                                      | 1                                                                | Article            | 0                           |
| 113 | Structural barriers to adhering to health behaviours in the context of the COVID-19 crisis: Considerations for low- and middle-income countries              | 0                                                                | Article            | 17                          |
| 114 | The role of mentoring in research ecosystems in Sub-Saharan Africa: Some experiences through the CARTA opportunity                                           | 1                                                                | Article            | 2                           |
| 115 | Human trafficking: The relationship between government efforts & survivor punishment                                                                         | 1                                                                | Article            | 0                           |

| No. | Title                                                                                                                                                                       | COVID-19-related publication = 0<br>non-COVID-19 publication = 1 | Document type      | Number of citations in 2021 |
|-----|-----------------------------------------------------------------------------------------------------------------------------------------------------------------------------|------------------------------------------------------------------|--------------------|-----------------------------|
| 116 | 'I feel safer in the streets than at home': Rethinking harm reduction for women in the urban margins                                                                        | 1                                                                | Article            | 0                           |
| 117 | 'They are a shame to the community ... ' stigma, school attendance, solitude and resilience among pregnant teenagers and teenage mothers in Mahama refugee camp, Rwanda     | 1                                                                | Article            | 5                           |
| 118 | Rethinking development interventions through the lens of decoloniality in sub-Saharan Africa: The case of global health                                                     | 1                                                                | Editorial Material | 0                           |
| 119 | Trust, community health workers and delivery of intermittent preventive treatment of malaria in pregnancy: a comparative qualitative analysis of four sub-Saharan countries | 1                                                                | Article            | 2                           |
| 120 | Precarious Lives: Forced sterilisation and the struggle for reproductive justice in Peru                                                                                    | 1                                                                | Article            | 0                           |
| 121 | Social network and social normative characteristics of married female adolescents in Dosso, Niger: Associations with modern contraceptive use                               | 1                                                                | Article            | 3                           |
| 122 | Diffusion in social norms change about violence against women: A longitudinal analysis of intervention data from a cluster randomised trial                                 | 1                                                                | Article            | 0                           |
| 123 | Lifting lockdown policies: A critical moment for COVID-19 stigma                                                                                                            | 0                                                                | Article            | 4                           |
| 124 | Seeing the bigger picture: Author's response to global health research became the norm: A response to 'what happened to the global forum for health research'               | 1                                                                | Editorial Material | 0                           |
| 125 | Typologies of violence against women in Brazil: A latent class analysis of how violence and HIV intersect                                                                   | 1                                                                | Article            | 1                           |
| 126 | Socioecological determinants of community resource utilisation among low-income women in Mexico City who experienced male-to-female intimate partner violence               | 1                                                                | Article            | 1                           |
| 127 | Implications of HIV treatment policies on the health workforce in rural Malawi and Tanzania between 2013 and 2017: Evidence from the SHAPE-UTT study                        | 1                                                                | Article            | 1                           |
| 128 | YouTube as a source of medical information on the novel coronavirus 2019 disease (COVID-19) pandemic                                                                        | 0                                                                | Article            | 22                          |

| No. | Title                                                                                                                                                                                           | COVID-19-related publication = 0<br>non-COVID-19 publication = 1 | Document type            | Number of citations in 2021 |
|-----|-------------------------------------------------------------------------------------------------------------------------------------------------------------------------------------------------|------------------------------------------------------------------|--------------------------|-----------------------------|
| 129 | Providing healthcare to Ebola survivors: A qualitative exploratory investigation of healthcare providers' views and experiences in Sierra Leone                                                 | 1                                                                | Article                  | 2                           |
| 130 | Does free-market capitalism drive unequal access to health? An empirical analysis, 1970-2015                                                                                                    | 1                                                                | Article                  | 1                           |
| 131 | Violence against women in urban slums of India: A review of two decades of research                                                                                                             | 1                                                                | Review                   | 0                           |
| 132 | Early sexual debut: A multi-country, sex-stratified analysis in sub-Saharan Africa                                                                                                              | 1                                                                | Article                  | 0                           |
| 133 | Influence of evolving HIV treatment guidance on CD4 counts and viral load monitoring: A mixed-methods study in three African countries                                                          | 1                                                                | Article                  | 2                           |
| 134 | Health non-governmental organizations (NGOs) amidst civil unrest: Lessons learned from Nicaragua                                                                                                | 1                                                                | Article                  | 0                           |
| 135 | Social networks for health communication in rural Uganda: A mixed-method analysis of Dekabusa Trading Centre, Luwero County (vol 52, pg 931, 2020)                                              | 1                                                                | Correction               | 0                           |
| 136 | The effects of COVID-19 on the health and socio-economic security of sex workers in Nairobi, Kenya: Emerging intersections with HIV                                                             | 0                                                                | Editorial Material       | 19                          |
| 137 | How does socioeconomic development in Brazil shape social inequalities in diabetes?                                                                                                             | 1                                                                | Article                  | 0                           |
| 138 | Institutional overlap and access to medicines in MERCOSUR and UNASUR (2008-2018). Cooperation before the collapse?                                                                              | 1                                                                | Article                  | 3                           |
| 139 | Sociocultural, behavioural and political factors shaping the COVID-19 pandemic: the need for a biocultural approach to understanding pandemics and (re)emerging pathogens (vol 16, pg 17, 2020) | 0                                                                | Correction; Early Access | 0                           |
| 140 | Understanding the influence of health systems on women's experiences of Option B plus : A meta-ethnography of qualitative research from sub-Saharan Africa                                      | 1                                                                | Review                   | 2                           |
| 141 | Girls and women speak out from Afghan moral prisons: Tackling extremism and violence against women in a conflict environment                                                                    | 1                                                                | Article                  | 2                           |
| 142 | The impacts of contraceptive stock-outs on users, providers, and facilities: A systematic literature review                                                                                     | 1                                                                | Review                   | 0                           |

| No. | Title                                                                                                                                                                                                                           | COVID-19-related publication = 0<br>non-COVID-19 publication = 1 | Document type      | Number of citations in 2021 |
|-----|---------------------------------------------------------------------------------------------------------------------------------------------------------------------------------------------------------------------------------|------------------------------------------------------------------|--------------------|-----------------------------|
| 143 | Should female community health volunteers (FCHVs) facilitate a response to gender-based violence (GBV)? A mixed methods exploratory study in Mangalsen, Nepal                                                                   | 1                                                                | Article            | 0                           |
| 144 | The routine of the street outreach office team: Procedures and care for the homeless                                                                                                                                            | 1                                                                | Article            | 0                           |
| 145 | COVID-19 pandemic and Rohingya refugees in Bangladesh: What are the major concerns?                                                                                                                                             | 0                                                                | Editorial Material | 5                           |
| 146 | A look into the challenges and complexities of managing low back pain in Mexico                                                                                                                                                 | 1                                                                | Article            | 0                           |
| 147 | Medical populism and the COVID-19 pandemic                                                                                                                                                                                      | 0                                                                | Article            | 44                          |
| 148 | How district health decision-making is shaped within decentralised contexts: A qualitative research in Malawi, Uganda and Ghana                                                                                                 | 1                                                                | Article            | 3                           |
| 149 | Bridging the commitment-compliance gap in global health politics: Lessons from international relations for the global action plan on antimicrobial resistance                                                                   | 1                                                                | Article            | 1                           |
| 150 | What Happened to the Global Forum for Health Research?                                                                                                                                                                          | 1                                                                | Article            | 0                           |
| 151 | Towards a new definition of health security: A three-part rationale for the twenty-first century                                                                                                                                | 1                                                                | Article            | 3                           |
| 152 | 'It has become everybody's business and nobody's business': Policy actor perspectives on the implementation of TB infection prevention and control (IPC) policies in South African public sector primary care health facilities | 1                                                                | Article            | 3                           |
| 153 | The duration effect of pictorial health warnings on tobacco consumption in Mexico                                                                                                                                               | 1                                                                | Article            | 0                           |
| 154 | 'I tell them that sex is sweet at the right time' - A qualitative review of 'pleasure gaps and opportunities' in sexuality education programmes in Ghana and Kenya                                                              | 1                                                                | Review             | 6                           |
| 155 | Could attitudes toward COVID-19 in Spain render men more vulnerable than women?                                                                                                                                                 | 0                                                                | Article            | 23                          |
| 156 | Scientific literature on food and nutrition security in primary health care: A scoping review                                                                                                                                   | 1                                                                | Review             | 0                           |
| 157 | Community-based savings groups, women's agency, and maternal health service utilisation: Evidence from Mozambique                                                                                                               | 1                                                                | Article            | 0                           |

| No. | Title                                                                                                                                                                               | COVID-19-related publication = 0<br>non-COVID-19 publication = 1 | Document type         | Number of citations in 2021 |
|-----|-------------------------------------------------------------------------------------------------------------------------------------------------------------------------------------|------------------------------------------------------------------|-----------------------|-----------------------------|
| 158 | 'I'm waiting for that': Interest in the use of PrEP for safer conception in Botswana                                                                                                | 1                                                                | Article               | 1                           |
| 159 | Therapeutic itineraries of Congolese refugees in the city of Sao Paulo                                                                                                              | 1                                                                | Article               | 2                           |
| 160 | Contesting everyday violence: Resilience pathways of gay and transgender youth in Peru                                                                                              | 1                                                                | Article               | 1                           |
| 161 | Exploring intimate partner violence among pregnant Eswatini women seeking antenatal care: How agency and food security impact violence-related outcomes                             | 1                                                                | Article; Early Access | 0                           |
| 162 | The role of faith-based health professions schools in Cameroon's health system                                                                                                      | 1                                                                | Article               | 1                           |
| 163 | Risk factors for alcohol and drug misuse amongst young women in informal settlements in Durban, South Africa                                                                        | 1                                                                | Article               | 2                           |
| 164 | Disconnections between medical education and medical practice: A neglected dilemma (vol 85, pg 531, 2020)                                                                           | 1                                                                | Correction            | 0                           |
| 165 | The MOMENTUM study: Putting the 'Three Delays' to work to evaluate access to emergency obstetric and neonatal care in a remote island community in Western Kenya                    | 1                                                                | Article               | 1                           |
| 166 | Access to innovative medicines by pharma companies: Sustainable initiatives for global health or useful advertisement?                                                              | 1                                                                | Article               | 2                           |
| 167 | Decolonising global health in the time of COVID-19                                                                                                                                  | 0                                                                | Article               | 7                           |
| 168 | Socio-cultural factors influencing the decision of women to seek care during pregnancy and delivery: A qualitative study in South Tongu District, Ghana                             | 1                                                                | Article               | 1                           |
| 169 | Health, quality of life, and wellbeing of older slum dwellers in sub-Saharan Africa: A scoping review                                                                               | 1                                                                | Review                | 0                           |
| 170 | Programmatic norms change to eliminate violence against children: Insights for practitioners and researchers from a UNICEF global mapping study                                     | 1                                                                | Article               | 0                           |
| 171 | Depression and delayed tuberculosis treatment initiation among newly diagnosed patients in Botswana                                                                                 | 1                                                                | Article               | 0                           |
| 172 | Perceived barriers and facilitators to diet and physical activity among adults diagnosed with type 2 diabetes in Malawi                                                             | 1                                                                | Article               | 3                           |
| 173 | Reducing sexual risk and promoting acceptance of men who have sex with men living with HIV in India: Outcomes and process evaluation of a pilot randomised multi-level intervention | 1                                                                | Article               | 4                           |

| No. | Title                                                                                                                                                        | COVID-19-related publication = 0<br>non-COVID-19 publication = 1 | Document type      | Number of citations in 2021 |
|-----|--------------------------------------------------------------------------------------------------------------------------------------------------------------|------------------------------------------------------------------|--------------------|-----------------------------|
| 174 | Lack of full citizenship rights linked to heightened client condom refusal among im/migrant sex workers in Metro Vancouver (2010-2018)                       | 1                                                                | Article            | 3                           |
| 175 | Measuring the effectiveness of communication programming on menstrual health and hygiene management (MHM) social norms among adolescent girls in India       | 1                                                                | Article            | 0                           |
| 176 | Bringing ethical thinking to social change initiatives: Why it matters                                                                                       | 1                                                                | Article            | 1                           |
| 177 | Assessing sector representation of non-state actors within the World Health Organisation Framework Convention on Tobacco Control                             | 1                                                                | Article            | 0                           |
| 178 | Death tolls of COVID-19: Where come the fallacies and ways to make them more accurate                                                                        | 0                                                                | Editorial Material | 5                           |
| 179 | Gender-norms, violence and adolescence: Exploring how gender norms are associated with experiences of childhood violence among young adolescents in Ethiopia | 1                                                                | Article            | 2                           |
| 180 | A call for a gender-responsive, intersectional approach to address COVID-19                                                                                  | 0                                                                | Article            | 28                          |
| 181 | Living conditions and health care usage of Haitian families in the Dominican Republic: A comparison of urban and rural/peri-urban households                 | 1                                                                | Article            | 0                           |
| 182 | 'I have a lot of faith in her': Value of community health workers in addressing family planning in rural Ghana                                               | 1                                                                | Article            | 0                           |
| 183 | The ghost in the data: Evidence gaps and the problem of fake drugs in global health research                                                                 | 1                                                                | Article            | 3                           |
| 184 | Diabetes in a humanitarian crisis: Atypical clinical presentations and challenges to clinical- and community-based management among Somalis in Ethiopia      | 1                                                                | Article            | 1                           |
| 185 | Political distrust and the spread of COVID-19 in Nigeria                                                                                                     | 0                                                                | Article            | 17                          |
| 186 | Inclusion of human rights in sexual and reproductive health programming: Facilitators and barriers to implementation                                         | 1                                                                | Article            | 3                           |
| 187 | Provider perspectives on the role of the patient as an active participant in HIV care                                                                        | 1                                                                | Article            | 2                           |
| 188 | COVID-19: Can this crisis be transformative for global health?                                                                                               | 0                                                                | Editorial Material | 1                           |

| No. | Title                                                                                                                                                        | COVID-19-related publication = 0<br>non-COVID-19 publication = 1 | Document type         | Number of citations in 2021 |
|-----|--------------------------------------------------------------------------------------------------------------------------------------------------------------|------------------------------------------------------------------|-----------------------|-----------------------------|
| 189 | 'She is like my mother': Community-based care of drug-resistant tuberculosis in rural Eswatini                                                               | 1                                                                | Article               | 1                           |
| 190 | Road to family planning and RMNCHN related SDGs: Tracing the role of public health spending in India                                                         | 1                                                                | Article               | 3                           |
| 191 | Dismantling historical power inequality through authentic health research collaboration: Southern partners' aspirations                                      | 1                                                                | Article               | 3                           |
| 192 | 'Zero Leprosy' and other endgame strategies: Rhetoric vs. realism in public health campaigns                                                                 | 1                                                                | Article               | 3                           |
| 193 | Associations between exposures to occupation-related events, depression and intimate partner violence among women in the occupied Palestinian Territories    | 1                                                                | Article               | 1                           |
| 194 | Implementation and experiences of integrated prevention of mother-to-child transmission services in Tanzania, Malawi and South Africa: A mixed methods study | 1                                                                | Article               | 0                           |
| 195 | Strategic use of patent opposition safeguard to improve equitable access to innovative health technologies: A case study of CAR T-cell therapy Kymriah       | 1                                                                | Article; Early Access | 0                           |
| 196 | Validation of an adapted instrument to measure female genital fistula-related stigma                                                                         | 1                                                                | Article               | 0                           |
| 197 | Consequences of male partner engagement policies on HIV care-seeking in three African countries: Findings from the SHAPE UTT study                           | 1                                                                | Article               | 2                           |
| 198 | Public-private partnering as a modus operandi: Explaining the Gates Foundation's approach to global health governance                                        | 1                                                                | Article               | 3                           |
| 199 | Social and structural determinants of youth alcohol use in Tanzania: The role of gender, social vulnerability and stigma                                     | 1                                                                | Article               | 0                           |
| 200 | HIV Policy Advancements in PEPFAR Partner countries: a review of data from 2010-2016                                                                         | 1                                                                | Review                | 0                           |
| 201 | Governing COVID-19 without government in Brazil: Ignorance, neoliberal authoritarianism, and the collapse of public health leadership                        | 0                                                                | Article               | 67                          |
| 202 | Adolescent mothers affected by HIV and their children: A scoping review of evidence and experiences from sub-Saharan Africa                                  | 1                                                                | Review                | 3                           |
| 203 | Unmet healthcare needs among migrants without medical insurance in Montreal, Canada                                                                          | 1                                                                | Article               | 3                           |



| No. | Title                                                                                                                                                                       | COVID-19-related publication = 0<br>non-COVID-19 publication = 1 | Document type      | Number of citations in 2021 |
|-----|-----------------------------------------------------------------------------------------------------------------------------------------------------------------------------|------------------------------------------------------------------|--------------------|-----------------------------|
| 204 | COVID-19 reveals weak health systems by design: Why we must remake global health in this historic moment                                                                    | 0                                                                | Article            | 15                          |
| 205 | Childhood malnutrition within the indigenous Wayuu children of northern Colombia (Jan, 10.1080/17441692.2020.1712448, 2020)                                                 | 1                                                                | Correction         | 0                           |
| 206 | Conceptions within misconceptions: Pluralisms in an Ebola vaccine trial in West Africa                                                                                      | 1                                                                | Article            | 2                           |
| 207 | Food insecurity and social injustice: The plight of urban poor African immigrants in South Africa during the COVID-19 crisis                                                | 0                                                                | Article            | 5                           |
| 208 | Exploring the evolution of policies for universal antiretroviral therapy and their implementation across three sub-Saharan African countries: Findings from the SHAPE study | 1                                                                | Article            | 1                           |
| 209 | Assessing the prospect of a common health-related stigma reduction response: Cross-perspectives of people living with stigmatised health conditions in Indonesia            | 1                                                                | Article            | 0                           |
| 210 | Analysing the global health agenda: A comparison of priority for diabetes and oral diseases                                                                                 | 1                                                                | Article            | 2                           |
| 211 | Access to Healthcare in a time of COVID-19: Sex Workers in Crisis in Nairobi, Kenya                                                                                         | 0                                                                | Article            | 14                          |
| 212 | Translating gene drive science to promote linguistic diversity in community and stakeholder engagement                                                                      | 1                                                                | Article            | 0                           |
| 213 | Social networks for health communication in rural Uganda: A mixed-method analysis of Dekabusa Trading Centre, Luwero County                                                 | 1                                                                | Article            | 1                           |
| 214 | The emergence of the national medical assistance scheme for the poorest in Mali                                                                                             | 1                                                                | Article            | 0                           |
| 215 | Multi-dimensional effects of the COVID-19 pandemic considering the WHO's ecological approach                                                                                | 0                                                                | Editorial Material | 2                           |
| 216 | Risk factors for self-reported cataract symptoms, diagnosis, and surgery uptake among older adults in India: Findings from the WHO SAGE data                                | 1                                                                | Article            | 0                           |
| 217 | Community response to the Ebola outbreak: Contribution of community-based organisations and community leaders in four health districts in Guinea                            | 1                                                                | Article            | 2                           |

| No. | Title                                                                                                                                     | COVID-19-related publication = 0<br>non-COVID-19 publication = 1 | Document type | Number of citations in 2021 |
|-----|-------------------------------------------------------------------------------------------------------------------------------------------|------------------------------------------------------------------|---------------|-----------------------------|
| 218 | What is trauma? Qualitatively assessing stakeholder perceptions in Santa Cruz de la Sierra, Bolivia                                       | 1                                                                | Article       | 1                           |
| 219 | Challenges in accessing and utilising health services for women accessing DOTS TB services in Kolkata, India                              | 1                                                                | Article       | 1                           |
| 220 | Right-wing populism in Poland and anti-vaccine myths on YouTube: Political and cultural threats to public health                          | 1                                                                | Article       | 10                          |
| 221 | A citizen science approach to determine perceived barriers and promoters of physical activity in a low-income South African community     | 1                                                                | Article       | 4                           |
| 222 | Factors associated with recent HIV testing uptake and HIV-positive serostatus among female sex workers in Addis Ababa, Ethiopia           | 1                                                                | Article       | 0                           |
| 223 | Assessing the effect of socio-economic features of low-income communities and COVID-19 related cases: An empirical study of New York City | 0                                                                | Article       | 1                           |
| 224 | Transnational determinants of health for Central American migrants to the US: Results of a qualitative study                              | 1                                                                | Article       | 1                           |
| 225 | Understanding India's urban dengue surveillance: A qualitative policy analysis of Hyderabad district                                      | 1                                                                | Article       | 2                           |
| 226 | Disconnections between medical education and medical practice: A neglected dilemma*                                                       | 1                                                                | Article       | 4                           |
| 227 | 'PrEP should be for men only': Young heterosexual men's views on PrEP in rural South Africa                                               | 1                                                                | Article       | 2                           |

**Data source:** Web of Science

**Table S12 List of articles published in *Globalization and Health* in 2020**

| No. | Title                                                                                                                                                                                                | COVID-19-related publication = 0<br>non-COVID-19 publication = 1 | Document type      | Number of citations in 2021 |
|-----|------------------------------------------------------------------------------------------------------------------------------------------------------------------------------------------------------|------------------------------------------------------------------|--------------------|-----------------------------|
| 1   | Economic arguments in migrant health policymaking: proposing a research agenda                                                                                                                       | 1                                                                | Article            | 2                           |
| 2   | Public health and corporate social responsibility: exploratory study on pharmaceutical companies in an emerging market                                                                               | 1                                                                | Article            | 2                           |
| 3   | The architecture of the state was transformed in favour of the interests of companies: corporate political activity of the food industry in Colombia                                                 | 1                                                                | Article            | 7                           |
| 4   | Globalization and health scholarship in a time of pandemic: from critical past to uncertain future                                                                                                   | 1                                                                | Editorial Material | 0                           |
| 5   | Equity and elderly health in India: reflections from 75th round National Sample Survey, 2017-18, amidst the COVID-19 pandemic                                                                        | 0                                                                | Article            | 3                           |
| 6   | Using volunteered geographic information to assess mobility in the early phases of the COVID-19 pandemic: a cross-city time series analysis of 41 cities in 22 countries from March 2nd to 26th 2020 | 0                                                                | Article            | 10                          |
| 7   | When altruists cannot help: the influence of altruism on the mental health of university students during the COVID-19 pandemic                                                                       | 0                                                                | Article            | 12                          |
| 8   | Review of the reverse innovation series in globalization and health - where are we and what else is needed?                                                                                          | 1                                                                | Review             | 2                           |
| 9   | Health intersectoralism in the Sustainable Development Goal era: from theory to practice                                                                                                             | 1                                                                | Article            | 5                           |
| 10  | A community-based system dynamics approach for understanding factors affecting mental Health and Health seeking behaviors in Beirut and Beqaa regions of Lebanon                                     | 1                                                                | Article            | 8                           |
| 11  | Non-communicable disease governance in the era of the sustainable development goals: a qualitative analysis of food industry framing in WHO consultations                                            | 1                                                                | Article            | 12                          |
| 12  | Promoting the use of evidence in health policymaking in the ECOWAS region: the development and contextualization of an evidence-based policymaking guidance                                          | 1                                                                | Article            | 1                           |

| No. | Title                                                                                                                                                                                  | COVID-19-related publication = 0<br>non-COVID-19 publication = 1 | Document type      | Number of citations in 2021 |
|-----|----------------------------------------------------------------------------------------------------------------------------------------------------------------------------------------|------------------------------------------------------------------|--------------------|-----------------------------|
| 13  | Simulation exercises and after action reviews - analysis of outputs during 2016-2019 to strengthen global health emergency preparedness and response                                   | 1                                                                | Article            | 3                           |
| 14  | Social capital and public health: responding to the COVID-19 pandemic                                                                                                                  | 0                                                                | Article            | 6                           |
| 15  | Migrant workers in China need emergency psychological interventions during the COVID-19 outbreak                                                                                       | 0                                                                | Article            | 4                           |
| 16  | The enclosed ward management strategies in psychiatric hospitals during COVID-19 outbreak                                                                                              | 0                                                                | Letter             | 4                           |
| 17  | The Pearl River Declaration: a timely call for enhancing health security through fostering a regional one health collaboration in the Asia-Pacific                                     | 1                                                                | Article            | 0                           |
| 18  | Meeting the challenges posed by per diem in development projects in southern countries: a scoping review                                                                               | 1                                                                | Article            | 1                           |
| 19  | Understanding China's growing involvement in global health and managing processes of change                                                                                            | 1                                                                | Review             | 3                           |
| 20  | Heat-health vulnerability in temperate climates: lessons and response options from Ireland                                                                                             | 1                                                                | Article            | 2                           |
| 21  | Social capital is associated with improved subjective well-being of older adults with chronic non-communicable disease in six low- and middle-income countries                         | 1                                                                | Article            | 3                           |
| 22  | Prevalence and correlates of fatigue and its association with quality of life among clinically stable older psychiatric patients during the COVID-19 outbreak: a cross-sectional study | 0                                                                | Article            | 3                           |
| 23  | The psychological typhoon eye effect during the COVID-19 outbreak in China: the role of coping efficacy and perceived threat                                                           | 0                                                                | Article            | 5                           |
| 24  | Infertility policy analysis: a comparative study of selected lower middle- middle- and high-income countries                                                                           | 1                                                                | Article            | 1                           |
| 25  | Mitigating violence against women and young girls during COVID-19 induced lockdown in Nepal: a wake-up call                                                                            | 0                                                                | Article            | 7                           |
| 26  | Comparisons of social and demographic determinants of tobacco use in the Democratic Republic of the Congo                                                                              | 1                                                                | Article            | 0                           |
| 27  | Maternal health services utilisation among primigravidas in Uganda: what did the MDGs deliver?                                                                                         | 1                                                                | Article            | 1                           |
| 28  | Increasing the public health voice in global decision-making on nutrition labelling                                                                                                    | 1                                                                | Editorial Material | 7                           |

| No. | Title                                                                                                                                                                                | COVID-19-related publication = 0<br>non-COVID-19 publication = 1 | Document type | Number of citations in 2021 |
|-----|--------------------------------------------------------------------------------------------------------------------------------------------------------------------------------------|------------------------------------------------------------------|---------------|-----------------------------|
| 29  | The influence of concern about COVID-19 on mental health in the Republic of Georgia: a cross-sectional study                                                                         | 0                                                                | Article       | 4                           |
| 30  | Misinformation and de-contextualization: international media reporting on Sweden and COVID-19                                                                                        | 0                                                                | Article       | 17                          |
| 31  | Artificial intelligence in health care: laying the Foundation for Responsible, sustainable, and inclusive innovation in low- and middle-income countries                             | 1                                                                | Article       | 7                           |
| 32  | Tracking Japan's development assistance for health, 2012-2016                                                                                                                        | 1                                                                | Article       | 4                           |
| 33  | Diasporic medical tourism: a scoping review of quantitative and qualitative evidence                                                                                                 | 1                                                                | Review        | 3                           |
| 34  | Spatial and temporal distribution of infectious disease epidemics, disasters and other potential public health emergencies in the World Health Organisation Africa region, 2016-2018 | 1                                                                | Article       | 10                          |
| 35  | Circulating vaccine-derived poliovirus: a menace to the end game of polio eradication                                                                                                | 1                                                                | Letter        | 2                           |
| 36  | Determinants of enrollment decision in the community-based health insurance, North West Ethiopia: a case-control study                                                               | 1                                                                | Article       | 2                           |
| 37  | Selling second best: how infant formula marketing works                                                                                                                              | 1                                                                | Article       | 22                          |
| 38  | Challenges and Opportunities in China's Health Aid to Africa: Findings from Qualitative Interviews in Tanzania and Malawi                                                            | 1                                                                | Article       | 1                           |
| 39  | The north-south policy divide in transnational healthcare: a comparative review of policy research on medical tourism in source and destination countries                            | 1                                                                | Review        | 2                           |
| 40  | Food industry political practices in Chile: the economy has always been the main concern                                                                                             | 1                                                                | Article       | 10                          |
| 41  | Data and cooperation required for Venezuela's refugee crisis during COVID-19                                                                                                         | 0                                                                | Article       | 3                           |
| 42  | Challenges and recommendations for mental health providers during the COVID-19 pandemic: the experience of China's First University-based mental health team                         | 0                                                                | Article       | 5                           |
| 43  | Risk factors for adolescents' mental health during the COVID-19 pandemic: a comparison between Wuhan and other                                                                       | 0                                                                | Article       | 13                          |

| No. | Title                                                                                                                                                                                     | COVID-19-related publication = 0<br>non-COVID-19 publication = 1 | Document type | Number of citations in 2021 |
|-----|-------------------------------------------------------------------------------------------------------------------------------------------------------------------------------------------|------------------------------------------------------------------|---------------|-----------------------------|
|     | urban areas in China                                                                                                                                                                      |                                                                  |               |                             |
| 44  | Globalisation in the time of COVID-19: repositioning Africa to meet the immediate and remote challenges                                                                                   | 0                                                                | Article       | 19                          |
| 45  | Government policy and agricultural production: a scoping review to inform research and policy on healthy agricultural commodities                                                         | 1                                                                | Review        | 6                           |
| 46  | Globalization of national surgical, obstetric and anesthesia plans: the critical link between health policy and action in global surgery                                                  | 1                                                                | Article       | 15                          |
| 47  | The global diet and activity research (GDAR) network: a global public health partnership to address upstream NCD risk factors in urban low and middle-income contexts                     | 1                                                                | Article       | 5                           |
| 48  | Incorporating operational research in programmes funded by the Global Fund to Fight AIDS, Tuberculosis and Malaria in four sub-Saharan African countries                                  | 1                                                                | Article       | 1                           |
| 49  | Health technology assessment and priority setting for universal health coverage: a qualitative study of stakeholders' capacity, needs, policy areas of demand and perspectives in Nigeria | 1                                                                | Article       | 4                           |
| 50  | Rural development and shifts in household dietary practices from 1999 to 2010 in the Tapajos River region, Brazilian Amazon: empirical evidence from dietary surveys                      | 1                                                                | Article       | 3                           |
| 51  | Medical education: an Italian contribution to the discussion on global health education                                                                                                   | 1                                                                | Article       | 3                           |
| 52  | Serious games for serious crises: reflections from an infectious disease outbreak matrix game                                                                                             | 1                                                                | Article       | 0                           |
| 53  | Leaving no one behind: lessons from implementation of policies for universal HIV treatment to universal health coverage                                                                   | 1                                                                | Article       | 3                           |
| 54  | Early cases of SARS-CoV-2 infection in Uganda: epidemiology and lessons learned from risk-based testing approaches - March-April 2020                                                     | 0                                                                | Article       | 6                           |

| No. | Title                                                                                                                                                                                        | COVID-19-related publication = 0<br>non-COVID-19 publication = 1 | Document type | Number of citations in 2021 |
|-----|----------------------------------------------------------------------------------------------------------------------------------------------------------------------------------------------|------------------------------------------------------------------|---------------|-----------------------------|
| 55  | Prevalence of stress, anxiety, depression among the general population during the COVID-19 pandemic: a systematic review and meta-analysis                                                   | 0                                                                | Review        | 555                         |
| 56  | Methods to promote equity in health resource allocation in low- and middle-income countries: an overview                                                                                     | 1                                                                | Review        | 7                           |
| 57  | Understanding the trends in international agreements on pricing and reimbursement for newly marketed medicines and their implications for access to medicines: a computational text analysis | 1                                                                | Article       | 0                           |
| 58  | The FCTC dilemma on heated tobacco products                                                                                                                                                  | 1                                                                | Article       | 0                           |
| 59  | An overview of the commercial determinants of health                                                                                                                                         | 1                                                                | Review        | 28                          |
| 60  | Revisiting the public health implications of the United States-Mexico- Canada agreement                                                                                                      | 1                                                                | Letter        | 0                           |
| 61  | Connecting healthcare professionals in Central America through management and leadership development: a social network analysis                                                              | 1                                                                | Article       | 1                           |
| 62  | International cooperation in public health in Martinique: geostrategic utility for cancer surveillance in the Caribbean                                                                      | 1                                                                | Review        | 3                           |
| 63  | Bibliometric analysis of peer-reviewed literature on climate change and human health with an emphasis on infectious diseases                                                                 | 1                                                                | Article       | 11                          |
| 64  | The Manila Declaration on Migration and Health: commentary of the Association of Pacific Rim Universities Global Health Program                                                              | 1                                                                | Article       | 0                           |
| 65  | HIV/AIDS research in Africa and the Middle East: participation and equity in North-South collaborations and relationships                                                                    | 1                                                                | Article       | 5                           |
| 66  | Real GDP growth rates and healthcare spending - comparison between the G7 and the EM7 countries                                                                                              | 1                                                                | Article       | 30                          |
| 67  | COVID-19 in Africa: care and protection for frontline healthcare workers                                                                                                                     | 0                                                                | Review        | 83                          |
| 68  | Developing monitoring and evaluation tools for event-based surveillance: experience from Vietnam                                                                                             | 1                                                                | Article       | 1                           |
| 69  | Physicians' brain drain-a gravity model of migration flows                                                                                                                                   | 1                                                                | Article       | 5                           |

| No. | Title                                                                                                                                                                        | COVID-19-related publication = 0<br>non-COVID-19 publication = 1 | Document type | Number of citations in 2021 |
|-----|------------------------------------------------------------------------------------------------------------------------------------------------------------------------------|------------------------------------------------------------------|---------------|-----------------------------|
| 70  | The global governance of antimicrobial resistance: a cross-country study of alignment between the global action plan and national action plans                               | 1                                                                | Article       | 8                           |
| 71  | Challenges to peer support in low- and middle-income countries during COVID-19                                                                                               | 0                                                                | Article       | 4                           |
| 72  | Sustainable support solutions for community-based rehabilitation workers in refugee camps: piloting telehealth acceptability and implementation                              | 1                                                                | Article       | 1                           |
| 73  | West Nile virus in Europe: after action reviews of preparedness and response to the 2018 transmission season in Italy, Slovenia, Serbia and Greece                           | 1                                                                | Article       | 4                           |
| 74  | Public-private knowledge transfer and access to medicines: a systematic review and qualitative study of perceptions and roles of scientists involved in HPV vaccine research | 1                                                                | Review        | 0                           |
| 75  | Factors associated with psychological distress, fear and coping strategies during the COVID-19 pandemic in Australia                                                         | 0                                                                | Article       | 57                          |
| 76  | The International Health Regulations (2005), the threat of populism and the COVID-19 pandemic                                                                                | 0                                                                | Article       | 6                           |
| 77  | Comparison of tobacco import and tobacco control in five countries: lessons learned for Indonesia                                                                            | 1                                                                | Article       | 2                           |
| 78  | 'It's far too complicated': why fragmentation persists in global health                                                                                                      | 1                                                                | Article       | 6                           |
| 79  | Development assistance for health and the Middle East and North Africa                                                                                                       | 1                                                                | Article       | 0                           |
| 80  | Pseudoscientific beliefs and psychopathological risks increase after COVID-19 social quarantine                                                                              | 0                                                                | Article       | 10                          |
| 81  | Benchmarking the transparency, comprehensiveness and specificity of population nutrition commitments of major food companies in Malaysia                                     | 1                                                                | Article       | 5                           |
| 82  | Integrating the social sciences in epidemic preparedness and response: A strategic framework to strengthen capacities and improve Global Health security                     | 1                                                                | Article       | 4                           |
| 83  | How donors support civil society as government accountability advocates: a review of strategies and implications for transition of donor funding in global health            | 1                                                                | Review        | 1                           |



| No. | Title                                                                                                                                                                                                                     | COVID-19-related publication = 0<br>non-COVID-19 publication = 1 | Document type | Number of citations in 2021 |
|-----|---------------------------------------------------------------------------------------------------------------------------------------------------------------------------------------------------------------------------|------------------------------------------------------------------|---------------|-----------------------------|
| 84  | China's mental health support in response to COVID-19: progression, challenges and reflection                                                                                                                             | 0                                                                | Article       | 8                           |
| 85  | Mental health impacts among health workers during COVID-19 in a low resource setting: a cross-sectional survey from Nepal                                                                                                 | 0                                                                | Article       | 59                          |
| 86  | Bibliometric analysis of scientific publications on sustainable development goals with emphasis on good health and well-being goal (2015-2019)                                                                            | 1                                                                | Article       | 9                           |
| 87  | A qualitative exploration of the experiences of community health animation on malaria control in rural Malawi                                                                                                             | 1                                                                | Article       | 0                           |
| 88  | 'I know those people will be approachable and not mistreat us': a qualitative study of inspectors and private drug sellers' views on peer supervision in rural Uganda                                                     | 1                                                                | Article       | 0                           |
| 89  | Exploring anti-corruption, transparency, and accountability in the World Health Organization, the United Nations Development Programme, the World Bank Group, and the Global Fund to Fight AIDS, Tuberculosis and Malaria | 1                                                                | Review        | 3                           |
| 90  | Investigation of the differences between the medical personnel's and general population's view on the doctor-patient relationship in China by a cross-sectional survey                                                    | 1                                                                | Article       | 2                           |
| 91  | A systematic review of global health capacity building initiatives in low-to middle-income countries in the Middle East and North Africa region                                                                           | 1                                                                | Review        | 3                           |
| 92  | West Nile virus in Europe: after action reviews of preparedness and response to the 2018 transmission season in Italy, Slovenia, Serbia and Greece (vol 16, 47, 2020)                                                     | 1                                                                | Correction    | 0                           |
| 93  | Health systems influence on the pathways of care for lung cancer in low- and middle-income countries: a scoping review                                                                                                    | 1                                                                | Review        | 9                           |
| 94  | Assessing COVID-19 through the lens of health systems' preparedness: time for a change                                                                                                                                    | 0                                                                | Article       | 11                          |
| 95  | Promoting rational antibiotic use in Turkey and among Turkish migrants in Europe - implications of a qualitative study in four countries                                                                                  | 1                                                                | Article       | 0                           |

| No. | Title                                                                                                                                                           | COVID-19-related publication = 0<br>non-COVID-19 publication = 1 | Document type | Number of citations in 2021 |
|-----|-----------------------------------------------------------------------------------------------------------------------------------------------------------------|------------------------------------------------------------------|---------------|-----------------------------|
| 96  | Prevalence of depression and its correlative factors among female adolescents in China during the coronavirus disease 2019 outbreak                             | 0                                                                | Article       | 18                          |
| 97  | Global Health - emergence, hegemonic trends and biomedical reductionism                                                                                         | 1                                                                | Article       | 10                          |
| 98  | Systematic review of early abortion services in low- and middle-income country primary care: potential for reverse innovation and application in the UK context | 1                                                                | Review        | 2                           |
| 99  | Going for brokerage: strategies and strains in commercial healthcare facilitation                                                                               | 1                                                                | Article       | 0                           |
| 100 | Impact of international travel dynamics on domestic spread of 2019-nCoV in India: origin-based risk assessment in importation of infected travelers             | 0                                                                | Article       | 5                           |
| 101 | Global Health diplomacy for noncommunicable diseases prevention and control: a systematic review                                                                | 1                                                                | Review        | 6                           |
| 102 | USMCA 2.0: a few improvements but far from a 'healthy' trade treaty                                                                                             | 1                                                                | Article       | 3                           |
| 103 | Uganda's experience in Ebola virus disease outbreak preparedness, 2018-2019                                                                                     | 1                                                                | Article       | 8                           |
| 104 | Is countries' transparency associated with gaps between countries' self and external evaluations for IHR core capacity?                                         | 1                                                                | Article       | 5                           |
| 105 | Disease burden metrics and the innovations of leading pharmaceutical companies: a global and regional comparative study                                         | 1                                                                | Article       | 0                           |
| 106 | Educating, training, and exercising for infectious disease control with emphasis on cross-border settings: an integrative review                                | 1                                                                | Review        | 1                           |
| 107 | Effectiveness of wastewater treatment systems in removing microbial agents: a systematic review                                                                 | 1                                                                | Review        | 15                          |
| 108 | Cross-border COVID-19 spread amidst malaria re-emergence in Venezuela: a human rights analysis                                                                  | 0                                                                | Review        | 0                           |
| 109 | A survey of retail prices of antimicrobial products used in small-scale chicken farms in the Mekong Delta of Vietnam                                            | 1                                                                | Article       | 2                           |
| 110 | Industry strategies in the parliamentary process of adopting a sugar-sweetened beverage tax in South Africa: a systematic mapping                               | 1                                                                | Article       | 9                           |

| No. | Title                                                                                                                                                       | COVID-19-related publication = 0<br>non-COVID-19 publication = 1 | Document type | Number of citations in 2021 |
|-----|-------------------------------------------------------------------------------------------------------------------------------------------------------------|------------------------------------------------------------------|---------------|-----------------------------|
| 111 | Lessons learned from COVID-19 for the post-antibiotic future                                                                                                | 0                                                                | Article       | 5                           |
| 112 | Beyond the healthy immigrant paradox: decomposing differences in birthweight among immigrants in Spain                                                      | 1                                                                | Article       | 0                           |
| 113 | Physical rehabilitation in Iran after international sanctions: explored findings from a qualitative study                                                   | 1                                                                | Article       | 0                           |
| 114 | Get us partnerships!-a qualitative study of Angolan and Mozambican health academics' experiences with North/South partnerships                              | 1                                                                | Article       | 1                           |
| 115 | The prevalence of sleep disturbances among physicians and nurses facing the COVID-19 patients: a systematic review and meta-analysis                        | 0                                                                | Review        | 56                          |
| 116 | 'Calibrating to scale: a framework for humanitarian health organizations to anticipate, prevent, prepare for and manage climate-related health risks'       | 1                                                                | Article       | 1                           |
| 117 | Understanding the implications of the Sustainable Development Goals for health policy and systems research: results of a research priority setting exercise | 1                                                                | Article       | 7                           |

**Data source:** Web of Science

**Table S13 List of articles published in *International Health* in 2020**

| No. | Title                                                                                                                                                                   | COVID-19-related publication = 0<br>non-COVID-19 publication = 1 | Document type      | Number of citations in 2021 |
|-----|-------------------------------------------------------------------------------------------------------------------------------------------------------------------------|------------------------------------------------------------------|--------------------|-----------------------------|
| 1   | Measuring and decomposing the effort regarding the equity of inpatient benefits based on the adjustment of the new cooperative medical scheme in western rural China    | 1                                                                | Article            | 0                           |
| 2   | Competing ethics in a pilot strategy to implement parasitology training and research in post-Ebola Sierra Leone                                                         | 1                                                                | Article            | 0                           |
| 3   | Temporary disengagement and re-engagement in human immunodeficiency virus care in a rural county serving pastoralist communities in Kenya: a retrospective cohort study | 1                                                                | Article            | 2                           |
| 4   | Peanut butter-based formulations of amoxicillin for pediatric applications                                                                                              | 1                                                                | Article            | 1                           |
| 5   | Towards a fair and transparent research participant compensation and reimbursement framework in Vietnam                                                                 | 1                                                                | Article            | 1                           |
| 6   | Experiences of research ethics committee members and scientists of the research protocol review process in Uganda: a case study                                         | 1                                                                | Review             | 0                           |
| 7   | Prevalence and determinants of poor sleep quality and depression among postpartum women: a community-based study in Ramechhap district, Nepal                           | 1                                                                | Article            | 2                           |
| 8   | Analysis of quality of life in breast cancer survivors using structural equation modelling: the role of spirituality, social support and psychological well-being       | 1                                                                | Article            | 6                           |
| 9   | Adverse infant outcomes associated with caesarean section delivery in India                                                                                             | 1                                                                | Article            | 0                           |
| 10  | Association among ecological and behavioural attributes, dengue vector and disease control: a cross-sectional study of the city of Dhaka, Bangladesh                    | 1                                                                | Article            | 0                           |
| 11  | Urgent call for a global enforcement of the public sharing of health emergencies data: lesson learned from serious arboviral disease epidemics in Sudan COMMENT         | 1                                                                | Editorial Material | 5                           |
| 12  | Influence of publicly funded conditional cash transfer programmes on utilization patterns of healthcare services for acute childhood illness                            | 1                                                                | Article            | 2                           |

| No. | Title                                                                                                                                                                      | COVID-19-related publication = 0<br>non-COVID-19 publication = 1 | Document type      | Number of citations in 2021 |
|-----|----------------------------------------------------------------------------------------------------------------------------------------------------------------------------|------------------------------------------------------------------|--------------------|-----------------------------|
| 13  | The burgeoning role of global health diplomacy to alleviate suffering of cancer patients in low- and middle-income countries                                               | 1                                                                | Editorial Material | 1                           |
| 14  | Health inequality in the tropics and its costs: a Sustainable Development Goals alert                                                                                      | 1                                                                | Article            | 0                           |
| 15  | The ethical case for global measles eradication-justice and the Rule of Rescue                                                                                             | 1                                                                | Editorial Material | 0                           |
| 16  | Success of malaria chemoprophylaxis for outbound civil and military travellers in prevention of reintroduction of malaria in Sri Lanka                                     | 1                                                                | Article            | 0                           |
| 17  | The effect of a community-based health insurance on the out-of-pocket payments for utilizing medically trained providers in Bangladesh                                     | 1                                                                | Article            | 3                           |
| 18  | Quality of antimalarials in Kinshasa peri-urban areas with regard to local pharmaceutical legislation and regulation                                                       | 1                                                                | Article            | 0                           |
| 19  | Inflammatory bowel disease in Africa: what is the current state of knowledge?                                                                                              | 1                                                                | Review             | 3                           |
| 20  | Face and content validity of a prospective multidimensional performance instrument for service delivery in district health systems in low-income countries: a Delphi study | 1                                                                | Article            | 0                           |
| 21  | The Traveller's Risk Perception (TRiP) questionnaire: pre-travel assessment and post-travel changes                                                                        | 1                                                                | Article            | 1                           |
| 22  | A real-time policy dashboard can aid global transparency in the response to coronavirus disease 2019                                                                       | 1                                                                | Editorial Material | 2                           |
| 23  | COVID-19 and neglected tropical diseases in Africa: impacts, interactions, consequences                                                                                    | 0                                                                | Editorial Material | 17                          |
| 24  | Contextual factors affecting the integration of community health workers into the health system in Limpopo Province, South Africa                                          | 1                                                                | Article            | 3                           |
| 25  | Insecticide-treated bed net access and use among preschool children in Nouna District, Burkina Faso                                                                        | 1                                                                | Article            | 1                           |
| 26  | Shared decision making in musculoskeletal pain consultations in low- and middle-income countries: a systematic review                                                      | 1                                                                | Review             | 2                           |
| 27  | Analysis of quality of life in breast cancer survivors using structural equation modelling: the role of spirituality, social                                               | 1                                                                | Correction         | 0                           |

| No. | Title                                                                                                                                                                          | COVID-19-related publication = 0<br>non-COVID-19 publication = 1 | Document type      | Number of citations in 2021 |
|-----|--------------------------------------------------------------------------------------------------------------------------------------------------------------------------------|------------------------------------------------------------------|--------------------|-----------------------------|
|     | support and psychological well-being (vol 12, pg 354, 2020)                                                                                                                    |                                                                  |                    |                             |
| 28  | Meta-analysis of epilepsy prevalence in West Africa and its relationship with onchocerciasis endemicity and control                                                            | 1                                                                | Article            | 7                           |
| 29  | Prevention of opportunistic non-communicable diseases                                                                                                                          | 1                                                                | Editorial Material | 0                           |
| 30  | Trends in the prevalence of cognitive impairment in Chinese older adults: based on the Chinese Longitudinal Healthy Longevity Survey cohorts from 1998 to 2014                 | 1                                                                | Article            | 3                           |
| 31  | Providing oxygen to children and newborns: a multi-faceted technical and clinical assessment of oxygen access and oxygen use in secondary-level hospitals in southwest Nigeria | 1                                                                | Article            | 5                           |
| 32  | Spotlight on global health research                                                                                                                                            | 1                                                                | Editorial Material | 1                           |
| 33  | Prevalence of American Heart Association defined ideal cardiovascular health metrics in Nepal: findings from a nationally representative cross-sectional study                 | 1                                                                | Article            | 3                           |
| 34  | A stitch in time: narrative review of interventions to reduce preterm births in Malawi                                                                                         | 1                                                                | Review             | 0                           |
| 35  | A qualitative study of zoonotic risk factors among rural communities in southern China                                                                                         | 1                                                                | Article            | 9                           |
| 36  | Participant understanding of informed consent in a multidisease community-based health screening and biobank platform in rural South Africa                                    | 1                                                                | Article            | 3                           |
| 37  | In-hospital mortality among incident hemodialysis older patients in Peru                                                                                                       | 1                                                                | Article            | 0                           |
| 38  | Integrated community-based intervention for urinary schistosomiasis and soil-transmitted helminthiasis in children from Caxito, Angola                                         | 1                                                                | Article            | 2                           |
| 39  | Delays in care seeking, diagnosis and treatment of patients with pulmonary tuberculosis in Hubei, China                                                                        | 1                                                                | Article            | 4                           |
| 40  | Participant compensation in global health research: a case study                                                                                                               | 1                                                                | Article            | 1                           |
| 41  | Medical injection and access to sterile injection equipment in low- and middle-income countries: a meta-analysis of Demographic and Health Surveys (2010-2017)                 | 1                                                                | Article            | 1                           |

| No. | Title                                                                                                                                                                                                                                                | COVID-19-related publication = 0<br>non-COVID-19 publication = 1 | Document type      | Number of citations in 2021 |
|-----|------------------------------------------------------------------------------------------------------------------------------------------------------------------------------------------------------------------------------------------------------|------------------------------------------------------------------|--------------------|-----------------------------|
| 42  | Lessons for test and treat in an antiretroviral programme after decentralisation in Uganda: a retrospective analysis of outcomes in public healthcare facilities within the Lablite project                                                          | 1                                                                | Article            | 1                           |
| 43  | Artificial intelligence: opportunities and implications for the health workforce COMMENT                                                                                                                                                             | 1                                                                | Editorial Material | 2                           |
| 44  | Causes and predictors of mortality among Ghanaians hospitalised with endocrine disorders                                                                                                                                                             | 1                                                                | Article            | 1                           |
| 45  | Recommendations from Thai stakeholders about protecting HIV remission ('cure') trial participants: report from a participatory workshop                                                                                                              | 1                                                                | Article            | 1                           |
| 46  | Ethical research in global health emergencies: making the case for a broader understanding of 'research ethics'                                                                                                                                      | 1                                                                | Editorial Material | 0                           |
| 47  | A commentary on the interagency symposium: 'Building a Healthier Future: A Human Capital Perspective on Health and Education', presented at the European Congress of Tropical Medicine and International Health, Liverpool, UK, October 2019 COMMENT | 1                                                                | Editorial Material | 0                           |
| 48  | Understanding profit margins of medical providers from prescription drugs: evidence from Taiwan                                                                                                                                                      | 1                                                                | Article            | 0                           |
| 49  | Dietary patterns and breast cancer in Colombia: an ecological study                                                                                                                                                                                  | 1                                                                | Article            | 1                           |
| 50  | Hypertension and diabetes mellitus as risk factors for asthma in Korean adults: the Sixth Korea National Health and Nutrition Examination Survey                                                                                                     | 1                                                                | Article            | 4                           |
| 51  | Effectiveness of birthing kits for clean childbirth: a systematic review                                                                                                                                                                             | 1                                                                | Review             | 1                           |
| 52  | Consistency of the determinants of early initiation of breastfeeding in Ghana: insights from four Demographic and Health Survey datasets (vol 13, pg 39, 2021)                                                                                       | 1                                                                | Correction         | 0                           |
| 53  | Childhood familial environment and adulthood depression: evidence from a Chinese population-based study                                                                                                                                              | 1                                                                | Article            | 2                           |
| 54  | Perspectives of stakeholders on emergency obstetric care training in Kenya: a qualitative study                                                                                                                                                      | 1                                                                | Article            | 0                           |
| 55  | From risk to care: the hepatitis C screening and diagnostic cascade in a primary health care clinic in Karachi, Pakistan-a cohort study                                                                                                              | 1                                                                | Article            | 3                           |

| No. | Title                                                                                                                                                   | COVID-19-related publication = 0<br>non-COVID-19 publication = 1 | Document type | Number of citations in 2021 |
|-----|---------------------------------------------------------------------------------------------------------------------------------------------------------|------------------------------------------------------------------|---------------|-----------------------------|
| 56  | Decolonising global health: transnational research partnerships under the spotlight                                                                     | 1                                                                | Article       | 9                           |
| 57  | Seeking care from a traditional healer after injury in Sudan: an exploratory cross-sectional analysis                                                   | 1                                                                | Article       | 0                           |
| 58  | The effect of community hypertension management on blood pressure control and its determinants in southwest China                                       | 1                                                                | Article       | 3                           |
| 59  | Utilization of maternity waiting homes: before, during, and after the Ebola virus disease outbreak in Bong County, Liberia                              | 1                                                                | Article       | 1                           |
| 60  | Cohorts as collections of bodies and communities of persons: insights from the SEARCH010/RV254 research cohort                                          | 1                                                                | Article       | 2                           |
| 61  | Research ethics in context: understanding the vulnerabilities, agency and resourcefulness of research participants living along the Thai-Myanmar border | 1                                                                | Article       | 0                           |
| 62  | Management of paediatric burns in low- and middle-income countries: assessing capacity using the World Health Organization Surgical Assessment Tool     | 1                                                                | Article       | 0                           |
| 63  | Determinants of breastfeeding practices among mothers in Malawi: a population-based survey                                                              | 1                                                                | Article       | 6                           |
| 64  | The crowding out effect of out-of-pocket medication expenses of two major non-communicable diseases in Pakistan                                         | 1                                                                | Article       | 3                           |
| 65  | 'I treat it but I don't know what this disease is': a qualitative study on noma (cancrum oris) and traditional healing in northwest Nigeria             | 1                                                                | Article       | 2                           |
| 66  | Factors associated with under-5 mortality in three disadvantaged East African districts                                                                 | 1                                                                | Article       | 2                           |
| 67  | Low ivermectin use among 5-to 6-year-old children: observations from door-to-door surveys in onchocerciasis-endemic regions in Africa                   | 1                                                                | Article       | 3                           |
| 68  | Comparative ethnographies of medical research: materiality, social relations, citizenship and hope in Tanzania and Sierra Leone                         | 1                                                                | Article       | 1                           |
| 69  | Molecular characterization and antimicrobial susceptibility of bacterial isolates present in tap water of public toilets                                | 1                                                                | Article       | 2                           |
| 70  | Does involving male partners in antenatal care improve healthcare utilisation? Systematic review and meta-analysis of                                   | 1                                                                | Review        | 7                           |



| No. | Title                                                                                                                                            | COVID-19-related publication = 0<br>non-COVID-19 publication = 1 | Document type | Number of citations in 2021 |
|-----|--------------------------------------------------------------------------------------------------------------------------------------------------|------------------------------------------------------------------|---------------|-----------------------------|
|     | the published literature from low- and middle-income countries                                                                                   |                                                                  |               |                             |
| 71  | The Traveller's Risk Perception (TRiP) questionnaire: pre-travel assessment and post-travel changes (vol 12, pg 116, 2020)                       | 1                                                                | Correction    | 0                           |
| 72  | Re-evaluating herd protection by Vi typhoid vaccine in a cluster randomized trial                                                                | 1                                                                | Article       | 6                           |
| 73  | Role stress, social support and occupational burnout among physicians in China: a path analysis approach                                         | 1                                                                | Article       | 7                           |
| 74  | Vaccine stockouts and vaccination rate: examination of unique administrative data from Nigeria                                                   | 1                                                                | Article       | 1                           |
| 75  | Provider-perceived barriers to diagnosis and treatment of acute coronary syndrome in Tanzania: a qualitative study                               | 1                                                                | Article       | 3                           |
| 76  | Managing ancillary care in resource-constrained settings: Dilemmas faced by frontline HIV prevention researchers in a rural area in South Africa | 1                                                                | Article       | 3                           |
| 77  | Epidemiology of chronic kidney disease in Peru and its relation to social determinants of health                                                 | 1                                                                | Article       | 1                           |
| 78  | Perspectives of stakeholders on emergency obstetric care training in Kenya: a qualitative study (vol 12, pg 11, 2020)                            | 1                                                                | Correction    | 0                           |

**Data source:** Web of Science

**Table S14 List of articles published in *International Journal of Health Science–IJHS* in 2020**

| No. | Title                                                                                                                                                           | COVID-19-related publication = 0<br>non-COVID-19 publication = 1 | Document type      | Number of citations in 2021 |
|-----|-----------------------------------------------------------------------------------------------------------------------------------------------------------------|------------------------------------------------------------------|--------------------|-----------------------------|
| 1   | Tear down the walls: Disseminating open access research for a global impact                                                                                     | 1                                                                | Article            | 1                           |
| 2   | Factors affecting nurses' intention to leave their current jobs in Saudi Arabia                                                                                 | 1                                                                | Article            | 5                           |
| 3   | COVID-19: A global public health disaster                                                                                                                       | 0                                                                | Editorial Material | 6                           |
| 4   | Statistical procedures for evaluating trends in coronavirus disease-9 cases in the United States                                                                | 0                                                                | Article            | 0                           |
| 5   | Turmeric in the management of oral submucous fibrosis - A systematic review and meta-analysis                                                                   | 1                                                                | Review             | 2                           |
| 6   | Avascular necrosis of the femoral head: Assessment following developmental dysplasia of the hip management                                                      | 1                                                                | Article            | 2                           |
| 7   | Evaluation of cardiac biomarkers in smokers and non-smokers with chronic periodontitis                                                                          | 1                                                                | Article            | 1                           |
| 8   | Saudi Arabia and aerospace medicine in the era of the national vision of 2030                                                                                   | 1                                                                | Editorial Material | 0                           |
| 9   | Effects of high-intensity interval training on vascular function and maximum oxygen uptake in young sedentary females                                           | 1                                                                | Article            | 2                           |
| 10  | Coronavirus disease-19 spread in the Eastern Mediterranean Region, updates and prediction of disease progression in Kingdom of Saudi Arabia, Iran, and Pakistan | 0                                                                | Article            | 2                           |
| 11  | Intrathecal transplantation of autologous bone marrow mononuclear cells in patients with sub-acute and chronic spinal cord injury: An open-label study          | 1                                                                | Article            | 0                           |
| 12  | Great mimickers: Tumor-like lesions of uterine corpus                                                                                                           | 1                                                                | Article            | 0                           |
| 13  | Construct validity of the Herth Hope Index: A systematic review                                                                                                 | 1                                                                | Review             | 6                           |
| 14  | Environmental and individual factors associated with protection and predisposition to autoimmune diseases                                                       | 1                                                                | Article            | 0                           |
| 15  | Use of ultraviolet-C in environmental sterilization in hospitals: A systematic review on efficacy and safety                                                    | 1                                                                | Review             | 4                           |
| 16  | Small-cell neuroendocrine carcinoma of the urinary bladder: A case report                                                                                       | 1                                                                | Article            | 2                           |
| 17  | Hemoglobin level is associated with severe stroke among stroke patients in Saudi Arabia                                                                         | 1                                                                | Article            | 1                           |

| No. | Title                                                                                                                                                                                                     | COVID-19-related publication = 0<br>non-COVID-19 publication = 1 | Document type      | Number of citations in 2021 |
|-----|-----------------------------------------------------------------------------------------------------------------------------------------------------------------------------------------------------------|------------------------------------------------------------------|--------------------|-----------------------------|
| 18  | Determinants of birth asphyxia among newborns in Ethiopia: A systematic review and meta-analysis                                                                                                          | 1                                                                | Review             | 3                           |
| 19  | Biochemical studies on the protective effect of honey against doxorubicin-induced toxicity in BALB/C mice                                                                                                 | 1                                                                | Article            | 1                           |
| 20  | The risk of morbidities in newborns of antenatal vitamin D supplemented gestational diabetes mellitus patients                                                                                            | 1                                                                | Article            | 1                           |
| 21  | A systematic review and meta-analysis of randomized controlled trials, juxtaposing the control of glycemia and blood pressure between large dose empagliflozin and placebo among type 1 diabetes patients | 1                                                                | Review             | 1                           |
| 22  | Genetic influence of vitamin D receptor gene polymorphisms on osteoporosis risk                                                                                                                           | 1                                                                | Article            | 4                           |
| 23  | Access times for supraclavicular and infraclavicular approaches of subclavian vein catheterization in pacemaker insertion                                                                                 | 1                                                                | Article            | 0                           |
| 24  | Formulation and evaluation of microsphere of antiulcer drug using Acacia nilotica gum                                                                                                                     | 1                                                                | Article            | 0                           |
| 25  | COVID-19: Utilizing local experience to suggest optimal global strategies to prevent and control the pandemic                                                                                             | 0                                                                | Editorial Material | 4                           |
| 26  | Heart rate variability indices, biomarkers, and cardiac nerve density: Independent surrogate markers for diagnosis of diabetic cardiac autonomic neuropathy in type 2 diabetes mellitus animal model      | 1                                                                | Article            | 0                           |
| 27  | A case of unusual presentation of acute esophageal necrosis with pneumonia                                                                                                                                | 1                                                                | Article            | 0                           |
| 28  | Clinical features, serological findings, and survival rate comparison between early versus late-onset systemic lupus erythematosus from 2000 to 2010, two centers experience                              | 1                                                                | Article            | 0                           |
| 29  | Clinicopathological correlation of malignant skin tumors: A retrospective study of 5 years                                                                                                                | 1                                                                | Article            | 1                           |
| 30  | Evaluation of immunohistochemical expression of TWIST in oral epithelial dysplasia and squamous cell carcinoma                                                                                            | 1                                                                | Article            | 0                           |
| 31  | Consolidating medical ambulatory care services in the COVID-19 era                                                                                                                                        | 0                                                                | Editorial Material | 1                           |
| 32  | Intriguing case of giant intra-abdominal pseudocyst: Diagnostic dilemma                                                                                                                                   | 1                                                                | Review             | 0                           |
| 33  | Clinical and strategic outcomes of metastatic synovial sarcoma on limb                                                                                                                                    | 1                                                                | Article            | 1                           |
| 34  | Effect of bacillus bacterial extracts on the expression of major histocompatibility complex Class I and Class II receptors                                                                                | 1                                                                | Article            | 0                           |

| No. | Title                                                                                                                                                                                      | COVID-19-related publication = 0<br>non-COVID-19 publication = 1 | Document type      | Number of citations in 2021 |
|-----|--------------------------------------------------------------------------------------------------------------------------------------------------------------------------------------------|------------------------------------------------------------------|--------------------|-----------------------------|
|     | on MDA-MB 231 breast cancer cells                                                                                                                                                          |                                                                  |                    |                             |
| 35  | IGF1R immunohistochemistry in Ewing's sarcoma as predictor of response to targeted therapy                                                                                                 | 1                                                                | Article            | 0                           |
| 36  | Molecular characterization and susceptibility screening for methicillin-resistant Staphylococcus aureus reveals the dominant clones in a tertiary care hospital in Al Qassim, Saudi Arabia | 1                                                                | Article            | 0                           |
| 37  | Analysis of human brain by magnetic resonance imaging using content-based image retrieval                                                                                                  | 1                                                                | Article            | 0                           |
| 38  | Frequency of UCP2 45-bp Ins/Del polymorphism in Saudi population from Jazan area and its association with autoimmune hypothyroidism UCP2 45-bp Ins/Del frequency in hypothyroidism         | 1                                                                | Article            | 0                           |
| 39  | MicroRNA-543-3p a potential chemotherapy marker regulates the messenger RNA expression of survivin in patients with advanced breast cancer                                                 | 1                                                                | Article            | 0                           |
| 40  | Effectiveness and safety of recombinant factor VII in pediatric cardiac surgery aged 13 years or less: A meta-analysis                                                                     | 1                                                                | Review             | 0                           |
| 41  | Effect of glycemic control and dyslipidemia on plasma vascular endothelial growth factor and pigment epithelium-derived factor in diabetic retinopathy patients in Northern Nigeria        | 1                                                                | Article            | 1                           |
| 42  | COVID-19: Lost opportunities and lessons for the future                                                                                                                                    | 0                                                                | Editorial Material | 4                           |
| 43  | Large floating thrombus in the inferior vena cava                                                                                                                                          | 1                                                                | Article            | 0                           |
| 44  | Aminophylline for improving acute kidney injury in pediatric patients: A systematic review and meta-analysis                                                                               | 1                                                                | Review             | 0                           |
| 45  | Internet addiction among Saudi Arabian youth                                                                                                                                               | 1                                                                | Editorial Material | 3                           |
| 46  | Ginger and its active constituents as therapeutic agents: Recent perspectives with molecular evidences                                                                                     | 1                                                                | Editorial Material | 1                           |
| 47  | Why is cancer becoming a global endemic today?                                                                                                                                             | 1                                                                | Editorial Material | 2                           |
| 48  | Serum visfatin concentration and its relationship with sex hormones in obese Saudi women                                                                                                   | 1                                                                | Article            | 0                           |
| 49  | Minimal change disease with concurrent thin basement membrane disease: A case report                                                                                                       | 1                                                                | Article            | 0                           |
| 50  | Anorectal Melanoma: Unexpected tumor in unexpected population                                                                                                                              | 1                                                                | Article            | 0                           |

**Data source:** Web of Science

**Table S15 List of articles published in *Epidemiology and Global Health* in 2020**

| No. | Title                                                                                                                                                       | COVID-19-related publication = 0<br>non-COVID-19 publication = 1 | Document type      | Number of citations in 2021 |
|-----|-------------------------------------------------------------------------------------------------------------------------------------------------------------|------------------------------------------------------------------|--------------------|-----------------------------|
| 1   | Analysis of Host Cell Receptor GRP78 for Potential Natural Reservoirs of SARS-CoV-2                                                                         | 0                                                                | Editorial Material | 1                           |
| 2   | Clinical, Imaging, and Laboratory Characteristics of Adult-Mexican Patients with Tuberculous Meningitis: A Retrospective Cohort Study                       | 1                                                                | Article            | 2                           |
| 3   | Knowledge, Attitude and Practice of Lebanese Community Pharmacists toward Chronic Obstructive Pulmonary Disease (vol 10, pg 86, 2020)                       | 1                                                                | Correction         | 0                           |
| 4   | Predictors of Quality of Life in Transfusion-dependent Thalassemia Patients Based on the PRECEDE Model: A Structural Equation Modeling Approach             | 1                                                                | Article            | 0                           |
| 5   | Influence of Women's Empowerment on Place of Delivery in North Eastern and Western Kenya: A Cross-sectional Analysis of the Kenya Demographic Health Survey | 1                                                                | Article            | 0                           |
| 6   | Establishing Medical Coverage and Epidemiological Surveillance during the Grand Magal of Touba in Senegal: A Public Health Need                             | 1                                                                | Article            | 0                           |
| 7   | Second-line Drug Resistance Characterization in Mycobacterium tuberculosis by Genotype MTBDRsl Assay                                                        | 1                                                                | Article            | 2                           |
| 8   | Utility of Xpert MTB/RIF Assay for Diagnosis of Pediatric Tuberculosis Under Programmatic Conditions in India                                               | 1                                                                | Article            | 0                           |
| 9   | Relationship between the Human Development Index and its Components with Oral Cancer in Latin America (vol 9, pg 223, 2019)                                 | 1                                                                | Correction         | 0                           |
| 10  | Do Disease Awareness Days Work? A 5-Year Investigation Using Google Trends                                                                                  | 1                                                                | Letter             | 2                           |
| 11  | Evaluating the Effects of Climate and Environmental Factors on Under-5 Children Malaria Spatial Distribution Using Generalized Additive Models (GAMs)       | 1                                                                | Article            | 4                           |
| 12  | Accuracy of Five Multiple Imputation Methods in Estimating Prevalence of Type 2 Diabetes based on STEPS Surveys                                             | 1                                                                | Article            | 0                           |
| 13  | Double Burden of Malnutrition in the Asia-Pacific Region-A Systematic Review and Meta-analysis                                                              | 1                                                                | Review             | 6                           |
| 14  | Top Ethical Issues Concerning Healthcare Providers Working in Saudi Arabia                                                                                  | 1                                                                | Article            | 0                           |

| No. | Title                                                                                                                                                                             | COVID-19-related publication = 0<br>non-COVID-19 publication = 1 | Document type      | Number of citations in 2021 |
|-----|-----------------------------------------------------------------------------------------------------------------------------------------------------------------------------------|------------------------------------------------------------------|--------------------|-----------------------------|
| 15  | Knowledge, Attitude and Practice toward COVID-19 among Egyptians                                                                                                                  | 0                                                                | Article            | 17                          |
| 16  | Improved Access to Diagnostics for Rhodesian Sleeping Sickness around a Conservation Area in Malawi Results in Earlier Detection of Cases and Reduced Mortality                   | 1                                                                | Article            | 0                           |
| 17  | The Crucial Role of Midwives in Preventing Maternal Sepsis: It All Started in a Maternity Ward                                                                                    | 1                                                                | Editorial Material | 0                           |
| 18  | Dengue Outbreak Response and Control in Khyber Pakhtunkhwa, Pakistan: A Mixed Methods Study                                                                                       | 1                                                                | Article            | 0                           |
| 19  | Extraintestinal Manifestations of Inflammatory Bowel Disease in Middle Eastern Patients                                                                                           | 1                                                                | Article            | 1                           |
| 20  | First Prototype of the Infectious Diseases Seeker (IDS) Software for Prompt Identification of Infectious Diseases                                                                 | 1                                                                | Article            | 3                           |
| 21  | Quality of Life of End Stage Renal Disease Patients Undergoing Dialysis in Southern Part of Kerala, India: Financial Stability and Inter-dialysis Weight Gain as Key Determinants | 1                                                                | Article            | 0                           |
| 22  | COVID-19 in the Shadows of MERS-CoV in the Kingdom of Saudi Arabia                                                                                                                | 0                                                                | Editorial Material | 31                          |
| 23  | Operationalizing the One Health Approach in Uganda: Challenges and Opportunities                                                                                                  | 1                                                                | Review             | 3                           |
| 24  | COVID-19 Epidemic and Public Health Measures in China                                                                                                                             | 0                                                                | Article            | 4                           |
| 25  | Resurgence of Measles in Europe: A Systematic Review on Parental Attitudes and Beliefs of Measles Vaccine                                                                         | 1                                                                | Review             | 15                          |
| 26  | Evaluation of Noninvasive Respiratory Volume Monitoring in the PACU of a Low Resource Kenyan Hospital                                                                             | 1                                                                | Article            | 0                           |
| 27  | Prevalence and Factors Associated with Insomnia Among a Representative Sample of the Lebanese Population: Results of a Cross-Sectional Study                                      | 1                                                                | Article            | 6                           |
| 28  | Prevalence and Incidence of Low Back Pain in the Kingdom of Saudi Arabia: A Systematic Review                                                                                     | 1                                                                | Review             | 6                           |
| 29  | The Association between Out-of-Pocket Expenditure and COVID-19 Mortality Globally                                                                                                 | 0                                                                | Letter             | 3                           |
| 30  | Evaluation of Public Health Education and Workforce Needs in the Kingdom of Saudi Arabia                                                                                          | 1                                                                | Article            | 0                           |
| 31  | Adult Orbital Lesions in Saudi Arabia: A Multi-centered Demographic Study with Clinicopathological Correlation                                                                    | 1                                                                | Article            | 0                           |
| 32  | An Evaluation of Health Policy Implementation for Hajj Pilgrims in Indonesia                                                                                                      | 1                                                                | Review             | 0                           |

| No. | Title                                                                                                                                                               | COVID-19-related publication = 0<br>non-COVID-19 publication = 1 | Document type      | Number of citations in 2021 |
|-----|---------------------------------------------------------------------------------------------------------------------------------------------------------------------|------------------------------------------------------------------|--------------------|-----------------------------|
| 33  | Dietary Intakes, Patterns, and Determinants of Children Under 5 Years from Marginalized Communities in Odisha: A Cross-sectional Study                              | 1                                                                | Article            | 1                           |
| 34  | Rapid Estimation of Excess Mortality during the COVID-19 Pandemic in Portugal -Beyond Reported Deaths                                                               | 0                                                                | Article            | 10                          |
| 35  | COVID-19 in Turkey: Lessons Learned                                                                                                                                 | 0                                                                | Article            | 11                          |
| 36  | The Increasing Trends in Cases of the Most Common Cancers in Saudi Arabia                                                                                           | 1                                                                | Review             | 5                           |
| 37  | Prevalence, Risk Factors, and Epidemiology of Food-borne Botulism in Iran                                                                                           | 1                                                                | Article            | 1                           |
| 38  | Clinical Characteristics and Outcome of Hospitalized COVID-19 Patients in a MERS-CoV Endemic Area                                                                   | 0                                                                | Article            | 17                          |
| 39  | Helmet Continuous Positive Airway Pressure in the Treatment of COVID-19 Patients with Acute Respiratory Failure could be an Effective Strategy: A Feasibility Study | 0                                                                | Editorial Material | 3                           |
| 40  | The Epidemiology of HIV in Oman, 1984-2018: A Nationwide Study from the Middle East                                                                                 | 1                                                                | Article            | 8                           |
| 41  | A Qualitative Study of Factors Influencing the Onset of Hookah Smoking among Iranian Men with Turkmen Ethnicity                                                     | 1                                                                | Article            | 1                           |
| 42  | Epidemiology of Type 2 Diabetes - Global Burden of Disease and Forecasted Trends                                                                                    | 1                                                                | Article            | 153                         |
| 43  | Does Being Transported by Emergency Medical Services Improve Compliance with the Surviving Sepsis Bundle and Mortality Rate? A Retrospective Cohort Study           | 1                                                                | Article            | 0                           |
| 44  | Care-Related Quality of Life of Caregivers of Beta-Thalassemia Major Children: An Epidemiological Study in Eastern India                                            | 1                                                                | Article            | 6                           |
| 45  | Early Initiation of ARV Therapy Among TB-HIV Patients in Indonesia Prolongs Survival Rates!                                                                         | 1                                                                | Article            | 2                           |
| 46  | Health-Seeking Behavior of People in Indonesia: A Narrative Review                                                                                                  | 1                                                                | Review             | 9                           |
| 47  | Factors Associated with Cesarean Section among Primiparous Women in Georgia: A Registry-based Study                                                                 | 1                                                                | Article            | 0                           |
| 48  | Magnitude and Reasons for Gaps in Tuberculosis Diagnostic Testing and Treatment Initiation: An Operational Research Study from Dakshina Kannada, South India        | 1                                                                | Article            | 1                           |



| No. | Title                                                                                                                                    | COVID-19-related publication = 0<br>non-COVID-19 publication = 1 | Document type      | Number of citations in 2021 |
|-----|------------------------------------------------------------------------------------------------------------------------------------------|------------------------------------------------------------------|--------------------|-----------------------------|
| 49  | Epidemiological Profile of Helicobacter pylori Infection in Patients with Digestive Symptoms in Algeria                                  | 1                                                                | Article            | 1                           |
| 50  | The Precious Commodity of Time and Sub-Saharan Africa's Success in Keeping COVID-19 at Bay                                               | 0                                                                | Article            | 0                           |
| 51  | Effectiveness of Oseltamivir Prophylaxis in Influenza Outbreaks in Residential Aged Care                                                 | 1                                                                | Article            | 0                           |
| 52  | Number of People who Inject Drugs in Son La, Vietnam: Population Size Estimation Based on Official Records                               | 1                                                                | Article            | 0                           |
| 53  | Knowledge, Attitude and Practice of Lebanese Community Pharmacists toward Chronic Obstructive Pulmonary Disease                          | 1                                                                | Article            | 1                           |
| 54  | Assessment of Local Health Worker Attitudes toward International Medical Volunteers in Low- and Middle-income Countries: A Global Survey | 1                                                                | Article            | 0                           |
| 55  | Lack of MERS-CoV Co-infection among Hospitalized COVID-19 Patients in Saudi Arabia                                                       | 0                                                                | Editorial Material | 4                           |
| 56  | Efficacy of DAAs in the Treatment of Chronic HCV: Real-World Data from the Private Health-Care Sector of the Kingdom of Saudi Arabia     | 1                                                                | Article            | 1                           |
| 57  | HIV Testing among General Population with Sexually Transmitted Infection: Findings from Myanmar Demographic and Health Survey (2015-16)  | 1                                                                | Article            | 1                           |
| 58  | y Cervical Cancer Care Continuum in South India: Evidence from a Community-based Screening Program                                       | 1                                                                | Article            | 1                           |
| 59  | HIV Prevalence, Risk Factors for Infection, and Uptake of Prevention, Testing, and Treatment among Female Sex Workers in Namibia         | 1                                                                | Article            | 1                           |
| 60  | Population Risk Factors for COVID-19 Mortality in 93 Countries                                                                           | 0                                                                | Article            | 17                          |

**Data source:** Web of Science

**Table S16 List of articles published in *Journal of Global Health* in 2020**

| No. | Title                                                                                                                                                                             | COVID-19-related publication = 0<br>non-COVID-19 publication = 1 | Document type      | Number of citations in 2021 |
|-----|-----------------------------------------------------------------------------------------------------------------------------------------------------------------------------------|------------------------------------------------------------------|--------------------|-----------------------------|
| 1   | A typology of dietary and anthropometric measures of nutritional need among children across districts and parliamentary constituencies in India, 2016                             | 1                                                                | Article            | 3                           |
| 2   | Improving primary health care delivery in Bihar, India: Learning from piloting and statewide scale-up of Ananya                                                                   | 1                                                                | Article            | 0                           |
| 3   | Utilizing mobile health and community informants to collect real-time health care data in extremely low resource environments                                                     | 1                                                                | Article            | 0                           |
| 4   | Rapid response to the COVID-19 pandemic: Vietnam government's experience and preliminary success                                                                                  | 0                                                                | Article            | 15                          |
| 5   | Coronavirus in Colombia: Stigma and quarantine                                                                                                                                    | 0                                                                | Editorial Material | 4                           |
| 6   | How varying CD4 criteria for treatment initiation was associated with mortality of HIV-patients? A retrospective analysis of electronic health records from Andhra Pradesh, India | 1                                                                | Article            | 0                           |
| 7   | Pre-season football preparation in the era of COVID-19: Croatian Football Association Model                                                                                       | 0                                                                | Editorial Material | 6                           |
| 8   | The COVID-19 containment in Vietnam: What are we doing?                                                                                                                           | 0                                                                | Editorial Material | 18                          |
| 9   | India's Bhilwara COVID-19 containment policy response: Lessons for public health policy makers globally                                                                           | 0                                                                | Editorial Material | 1                           |
| 10  | The measles emergency is over, but the crisis continues - a call to action for the Pacific Islands                                                                                | 1                                                                | Editorial Material | 4                           |
| 11  | Increased prevalence of hypertension in Ghana: New 2017 American College of Cardiology/American Hypertension Association hypertension guidelines application                      | 1                                                                | Article            | 1                           |
| 12  | Will initial consultation patterns among undiagnosed cancer patients be the same after this COVID-19 pandemic? Experiences from the 2011 triple disaster in Fukushima, Japan      | 0                                                                | Editorial Material | 0                           |
| 13  | Association between daytime napping and obesity in Chinese middle-aged and older adults                                                                                           | 1                                                                | Article            | 2                           |
| 14  | Strong community-based health systems and national governance predict improvement in coverage of oral rehydration solution (ORS): a multilevel longitudinal model                 | 1                                                                | Article            | 1                           |

| No. | Title                                                                                                                                                                                                                                                        | COVID-19-related publication = 0<br>non-COVID-19 publication = 1 | Document type      | Number of citations in 2021 |
|-----|--------------------------------------------------------------------------------------------------------------------------------------------------------------------------------------------------------------------------------------------------------------|------------------------------------------------------------------|--------------------|-----------------------------|
| 15  | Community activism as a strategy to reduce intimate partner violence (IPV) in rural Rwanda: Results of a community randomised trial                                                                                                                          | 1                                                                | Article            | 4                           |
| 16  | Earthquake in the time of COVID-19: The story from Croatia (CroVID-20)                                                                                                                                                                                       | 0                                                                | Editorial Material | 11                          |
| 17  | Severe acute malnutrition treatment delivered by low-literate community health workers in South Sudan: A prospective cohort study                                                                                                                            | 1                                                                | Article            | 2                           |
| 18  | Perpetration of intimate partner violence and mental health outcomes: sex- and gender-disaggregated associations among adolescents and young adults in Nigeria                                                                                               | 1                                                                | Article            | 2                           |
| 19  | Setting global research priorities for private sector child health service delivery: Results from a CHNRI exercise                                                                                                                                           | 1                                                                | Article            | 0                           |
| 20  | Coping with the COVID-19 pandemic in Italy and Spain: Lessons in response urgency                                                                                                                                                                            | 0                                                                | Editorial Material | 1                           |
| 21  | Ethnic-minority health care workers discrimination: An example from Japan during COVID-19 pandemic                                                                                                                                                           | 0                                                                | Editorial Material | 1                           |
| 22  | The myth of psychological debriefings during the corona pandemic                                                                                                                                                                                             | 1                                                                | Editorial Material | 3                           |
| 23  | Association between social participation and cognitive function among middle- and old-aged Chinese: A fixed-effects analysis                                                                                                                                 | 1                                                                | Article            | 4                           |
| 24  | A classification of the aims of vaccination and its relevance to transgenerational justice                                                                                                                                                                   | 1                                                                | Editorial Material | 1                           |
| 25  | Impact of mobile health-enhanced supportive supervision and supply chain management on appropriate integrated community case management of malaria, diarrhoea, and pneumonia in children 2-59 months: A cluster randomised trial in Eastern Province, Zambia | 1                                                                | Article            | 2                           |
| 26  | A nationwide analysis of the excess death attributable to diabetes in Brazil                                                                                                                                                                                 | 1                                                                | Article            | 2                           |
| 27  | Knowledge, attitudes and practices of COVID-19 among income-poor households in the Philippines: A cross-sectional study                                                                                                                                      | 0                                                                | Article            | 45                          |
| 28  | Containing the spread of COVID-19 in Ethiopia                                                                                                                                                                                                                | 0                                                                | Editorial Material | 20                          |

| No. | Title                                                                                                                                                       | COVID-19-related publication = 0<br>non-COVID-19 publication = 1 | Document type      | Number of citations in 2021 |
|-----|-------------------------------------------------------------------------------------------------------------------------------------------------------------|------------------------------------------------------------------|--------------------|-----------------------------|
| 29  | The myth that Nigerians are immune to SARS-CoV-2 and that COVID-19 is a hoax are putting lives at risk                                                      | 0                                                                | Editorial Material | 5                           |
| 30  | Health disparities research is enabled by data diversity but requires much tighter integration of collaborative efforts                                     | 1                                                                | Editorial Material | 0                           |
| 31  | Design for extreme scalability: A wordless, globally scalable COVID-19 prevention animation for rapid public health communication                           | 0                                                                | Editorial Material | 2                           |
| 32  | The need to implement non-industry COVID-19 clinical trials in non-high-income countries                                                                    | 0                                                                | Editorial Material | 0                           |
| 33  | Saving the frontline health workforce amidst the COVID-19 crisis: Challenges and recommendations                                                            | 0                                                                | Editorial Material | 44                          |
| 34  | Academic careers in global pulmonary and critical care medicine                                                                                             | 1                                                                | Editorial Material | 2                           |
| 35  | The COVID-19 outbreak in Iran                                                                                                                               | 0                                                                | Editorial Material | 9                           |
| 36  | When will the battle against novel coronavirus end in Wuhan: A SEIR modeling analysis                                                                       | 0                                                                | Article            | 13                          |
| 37  | Will Jordan be closer to UHC after the COVID-19 pandemic?                                                                                                   | 0                                                                | Editorial Material | 0                           |
| 38  | Zero confirmed cases: The ways we curb COVID-19 in Taiwanese prisons                                                                                        | 0                                                                | Editorial Material | 2                           |
| 39  | Understanding the role of interpersonal violence in assisted partner notification for HIV: a mixed-methods study in refugee settlements in West Nile Uganda | 1                                                                | Article            | 0                           |
| 40  | Health coverage and what Kenya can learn from the COVID-19 pandemic                                                                                         | 0                                                                | Editorial Material | 5                           |
| 41  | Can global health opportunities lead to an increase in primary care physicians?                                                                             | 1                                                                | Editorial Material | 0                           |
| 42  | COVID 19: Frontline experience at a tertiary care hospital in UK                                                                                            | 0                                                                | Editorial Material | 2                           |
| 43  | Can early treatment of patients with risk factors contribute to managing the COVID-19 pandemic?                                                             | 0                                                                | Editorial Material | 6                           |
| 44  | Treatment delays in oncology patients during COVID-19 pandemic: A perspective                                                                               | 1                                                                | Editorial Material | 22                          |
| 45  | The roles of a Grandmother in African societies - please do not send them to old people's homes                                                             | 1                                                                | Editorial Material | 0                           |
| 46  | Factors affecting the successful implementation of Global Polio Eradication Initiative (GPEI) in low- and middle-income countries                           | 1                                                                | Editorial Material | 2                           |

| No. | Title                                                                                                                                                             | COVID-19-related publication = 0<br>non-COVID-19 publication = 1 | Document type      | Number of citations in 2021 |
|-----|-------------------------------------------------------------------------------------------------------------------------------------------------------------------|------------------------------------------------------------------|--------------------|-----------------------------|
| 47  | Current trends and challenges on dementia management and research in Latin America                                                                                | 1                                                                | Editorial Material | 7                           |
| 48  | Tackling COVID-19: Can the African continent play the long game?                                                                                                  | 0                                                                | Editorial Material | 14                          |
| 49  | The perils of COVID-19 in Nepal: Implications for population health and nutritional status                                                                        | 0                                                                | Editorial Material | 13                          |
| 50  | Consequences of the coronavirus pandemic for global health research and practice                                                                                  | 1                                                                | Editorial Material | 1                           |
| 51  | A combination of COVID-19 and dengue fever in Bangladesh: Preparedness of Bangladesh                                                                              | 0                                                                | Editorial Material | 2                           |
| 52  | SARS-CoV-2 and displaced persons in Afghanistan: A blind spot in epidemic preparedness                                                                            | 0                                                                | Editorial Material | 0                           |
| 53  | Investigating the association of health system characteristics and health care utilization: a multilevel model in China's ageing population                       | 1                                                                | Article            | 0                           |
| 54  | The generals and the war against COVID-19: The case of Zimbabwe                                                                                                   | 0                                                                | Editorial Material | 1                           |
| 55  | The resilience of two professionalized departmental health insurance units during the COVID-19 pandemic in Senegal                                                | 0                                                                | Editorial Material | 0                           |
| 56  | Implementing integrated community case management during conflict in Yemen                                                                                        | 1                                                                | Article            | 2                           |
| 57  | Global systematic review of cost of illness and economic evaluation studies associated with snakebite                                                             | 1                                                                | Review             | 0                           |
| 58  | Gender equality and global health: intersecting political challenges                                                                                              | 1                                                                | Article            | 3                           |
| 59  | From Africa to the World: Reimagining Africa's research capacity and culture in the global knowledge economy                                                      | 1                                                                | Editorial Material | 5                           |
| 60  | How Taiwan, a non-WHO member, takes actions in response to COVID-19                                                                                               | 0                                                                | Editorial Material | 7                           |
| 61  | Surviving mothers and lost babies - burden of stillbirths and neonatal deaths among women with maternal near miss in eastern Ethiopia: a prospective cohort study | 1                                                                | Article            | 3                           |
| 62  | Combination of CT and RT-PCR in the screening or diagnosis of COVID-19                                                                                            | 0                                                                | Editorial Material | 11                          |
| 63  | Government preparedness and response towards COVID-19 outbreak in Nigeria: A retrospective analysis of the last 6 months                                          | 0                                                                | Editorial Material | 1                           |
| 64  | Learning from Ananya: Lessons for primary health care performance improvement                                                                                     | 1                                                                | Editorial Material | 0                           |

| No. | Title                                                                                                                                                                                       | COVID-19-related publication = 0<br>non-COVID-19 publication = 1 | Document type      | Number of citations in 2021 |
|-----|---------------------------------------------------------------------------------------------------------------------------------------------------------------------------------------------|------------------------------------------------------------------|--------------------|-----------------------------|
| 65  | The impact of HIV status on the distance traveled to health facilities and adherence to care. A record-linkage study from rural South Africa                                                | 1                                                                | Article            | 0                           |
| 66  | Examining coverage, content, and impact of maternal nutrition interventions: the case for quality-adjusted coverage measurement                                                             | 1                                                                | Article            | 3                           |
| 67  | Estimating the catchment population and incidence of severe acute respiratory infections in a district hospital in Bousse, Burkina Faso                                                     | 1                                                                | Article            | 0                           |
| 68  | Social normative and social network factors associated with adolescent pregnancy: a cross-sectional study of 176 villages in rural Honduras                                                 | 1                                                                | Article            | 1                           |
| 69  | Screening policies, preventive measures and in-hospital infection of COVID-19 in global surgical practices                                                                                  | 0                                                                | Article            | 14                          |
| 70  | A comparative, correlate analysis and projection of global and regional life expectancy, healthy life expectancy, and their GAP: 1995-2025                                                  | 1                                                                | Article            | 3                           |
| 71  | Hygiene practices among young adolescents aged 12-15 years in low- and middle-income countries: a population-based study                                                                    | 1                                                                | Article            | 2                           |
| 72  | The contribution of service density and proximity to geographical inequalities in health care utilisation in Indonesia: A nation-wide multilevel analysis                                   | 1                                                                | Article            | 0                           |
| 73  | Use of a participatory quality assessment and improvement tool for maternal and neonatal hospital care. Part 1: Review of implementation features and observed quality gaps in 25 countries | 1                                                                | Review             | 0                           |
| 74  | UNCOVER registry: A searchable online catalogue for COVID-19 evidence reviews                                                                                                               | 0                                                                | Editorial Material | 1                           |
| 75  | A way to track governments' response and people's mobility changes in response to COVID-19 pandemic                                                                                         | 0                                                                | Editorial Material | 2                           |
| 76  | Impact of Indonesia's national health insurance scheme on inequality in access to maternal health services: A propensity score matched analysis                                             | 1                                                                | Article            | 6                           |
| 77  | Responding to COVID-19 in Brunei Darussalam: Lessons for small countries                                                                                                                    | 0                                                                | Editorial Material | 7                           |

| No. | Title                                                                                                                                  | COVID-19-related publication = 0<br>non-COVID-19 publication = 1 | Document type      | Number of citations in 2021 |
|-----|----------------------------------------------------------------------------------------------------------------------------------------|------------------------------------------------------------------|--------------------|-----------------------------|
| 78  | Exposure to air pollution and cognitive impairment risk: a meta-analysis of longitudinal cohort studies with dose-response analysis    | 1                                                                | Article            | 8                           |
| 79  | Understanding health seeking behaviors to inform COVID-19 surveillance and detection in resource-scarce settings                       | 0                                                                | Editorial Material | 1                           |
| 80  | Burden of valvular heart disease, 1990-2017: Results from the Global Burden of Disease Study 2017                                      | 1                                                                | Article            | 4                           |
| 81  | Regularizing daily routines for mental health during and after the COVID-19 pandemic                                                   | 0                                                                | Editorial Material | 23                          |
| 82  | The role of children in the transmission of SARS-CoV2: updated rapid review                                                            | 0                                                                | Review             | 23                          |
| 83  | Strengthening global commitment to eliminating cervical cancer: What lessons from the past can we apply to the future?                 | 1                                                                | Editorial Material | 0                           |
| 84  | Centre-based care is a significant predictor of lower body mass index in early childhood: Longitudinal evidence from Chile             | 1                                                                | Article            | 1                           |
| 85  | The role of children in transmission of SARS-CoV-2: A rapid review                                                                     | 0                                                                | Review             | 39                          |
| 86  | Expanding the reach of global health radiology via the world's first medical hybrid airship: A SWOT analysis                           | 1                                                                | Editorial Material | 4                           |
| 87  | Key concerns in terms of the response to the COVID-19 pandemic                                                                         | 0                                                                | Editorial Material | 0                           |
| 88  | Mental health and holistic care of migrant workers in Singapore during the COVID-19 pandemic                                           | 0                                                                | Editorial Material | 6                           |
| 89  | Time poverty: Obstacle to women's human rights, health and sustainable development                                                     | 1                                                                | Editorial Material | 1                           |
| 90  | Reopening safely - Lessons from Taiwan's COVID-19 response                                                                             | 0                                                                | Editorial Material | 0                           |
| 91  | Lessons from COVID-19 on the role of the state and the market in providing early testing                                               | 0                                                                | Editorial Material | 1                           |
| 92  | A nationwide program to improve clinical care quality in the Kyrgyz Republic                                                           | 1                                                                | Article            | 1                           |
| 93  | More effective strategies are required to strengthen public awareness of COVID-19: Evidence from Google Trends                         | 0                                                                | Article            | 28                          |
| 94  | Timing and number of antenatal care contacts in low- and middle-income countries: Analysis in the Countdown to 2030 priority countries | 1                                                                | Article            | 7                           |

| No. | Title                                                                                                                                                                                         | COVID-19-related publication = 0<br>non-COVID-19 publication = 1 | Document type      | Number of citations in 2021 |
|-----|-----------------------------------------------------------------------------------------------------------------------------------------------------------------------------------------------|------------------------------------------------------------------|--------------------|-----------------------------|
| 95  | What's in a name?: Exploring inconsistent and contradictory definitions and clinical guidelines for hypertensive disorders of pregnancy from published literature from Nigeria and Bangladesh | 1                                                                | Editorial Material | 0                           |
| 96  | Consider inequality: Another consequence of the coronavirus epidemic                                                                                                                          | 0                                                                | Editorial Material | 2                           |
| 97  | The contribution of district prioritization on maternal and newborn health interventions coverage in rural India                                                                              | 1                                                                | Article            | 1                           |
| 98  | Achieving sustainable development nutrition targets: the challenge for South Asia                                                                                                             | 1                                                                | Editorial Material | 3                           |
| 99  | Physical behaviors of 12-15 year-old adolescents in 54 low- and middle-income countries: Results from the Global School-based Student Health Survey                                           | 1                                                                | Article            | 5                           |
| 100 | Nutrition data use and needs: Findings from an online survey of global nutrition stakeholders                                                                                                 | 1                                                                | Article            | 1                           |
| 101 | Effects of underlying morbidities on the occurrence of deaths in COVID-19 patients: A systematic review and meta-analysis                                                                     | 0                                                                | Review             | 19                          |
| 102 | Natural outbreaks and bioterrorism: How to deal with the two sides of the same coin?                                                                                                          | 1                                                                | Editorial Material | 0                           |
| 103 | From biological safety to social safety: How Taiwan's community centered prevention program controlled the COVID-19 outbreak                                                                  | 0                                                                | Editorial Material | 6                           |
| 104 | Body mass index in early-pregnancy and selected maternal health outcomes: Findings from two cohorts in Bangladesh                                                                             | 1                                                                | Article            | 1                           |
| 105 | Answering 20 more questions on COVID-19 (March-April 2020)                                                                                                                                    | 0                                                                | Editorial Material | 7                           |
| 106 | Epidemiological analysis of the early 38 fatalities in Hubei,China, of the coronavirus disease 2019                                                                                           | 0                                                                | Article            | 6                           |
| 107 | Hypertonic saline nasal irrigation and gargling should be considered as a treatment option for COVID-19                                                                                       | 0                                                                | Editorial Material | 12                          |
| 108 | Models for estimating and projecting global, regional and national prevalence and disease burden of asthma: a systematic review                                                               | 1                                                                | Review             | 2                           |
| 109 | Association between food insecurity and cardiometabolic risk in adults and the elderly: A systematic review                                                                                   | 1                                                                | Review             | 2                           |
| 110 | SARS-CoV-2 updates in a West African population and precautionary measures for sustaining quality antenatal care                                                                              | 0                                                                | Editorial Material | 3                           |



| No. | Title                                                                                                                                                          | COVID-19-related publication = 0<br>non-COVID-19 publication = 1 | Document type      | Number of citations in 2021 |
|-----|----------------------------------------------------------------------------------------------------------------------------------------------------------------|------------------------------------------------------------------|--------------------|-----------------------------|
|     | delivery                                                                                                                                                       |                                                                  |                    |                             |
| 111 | The association of malaria infection and gestational hypertension in Africa: Systematic review and meta-analysis                                               | 1                                                                | Review             | 2                           |
| 112 | The ethics and value of contact tracing apps: International insights and implications for Scotland's COVID-19 response                                         | 0                                                                | Editorial Material | 12                          |
| 113 | COVID-19 mortality among pregnant women in Mexico: A retrospective cohort study                                                                                | 0                                                                | Article            | 4                           |
| 114 | The COVID-19 pandemic and Community Health Workers: An opportunity to maintain delivery of care and education for families of children with epilepsy in Zambia | 0                                                                | Editorial Material | 0                           |
| 115 | Suffering in silence: Sexual and gender-based violence against the Rohingya community and the importance of a global health response                           | 1                                                                | Editorial Material | 0                           |
| 116 | Tobacco use and sleep loss over worry among adolescents aged 12-15 years: A population-based study of 38 countries                                             | 1                                                                | Article            | 2                           |
| 117 | Improving fiscal space for health from the perspective of efficiency in low- and middle-income countries: What is the evidence?                                | 1                                                                | Article            | 3                           |
| 118 | Discordance in postnatal care between mothers and newborns: Measurement artifact or missed opportunity?                                                        | 1                                                                | Article            | 2                           |
| 119 | Using Google Trends to assess the impact of global public health days on online health information seeking behaviour in Central and South America              | 1                                                                | Article            | 9                           |
| 120 | The need to improve the laws and regulations relevant to the outbreak of COVID-19: What might be learned from China?                                           | 0                                                                | Editorial Material | 3                           |
| 121 | Coronavirus: An insight into global research until outbreak of COVID-19 and its implications for the future                                                    | 0                                                                | Article            | 5                           |
| 122 | Retrospective analysis of the accuracy of predicting the alert level of COVID-19 in 202 countries using Google Trends and machine learning                     | 0                                                                | Article            | 4                           |
| 123 | Why improving the measurement and monitoring of essential maternal and newborn health interventions matters                                                    | 1                                                                | Editorial Material | 1                           |
| 124 | Variability in published rates of influenza-associated hospitalizations: A systematic review, 2007-2018                                                        | 1                                                                | Review             | 2                           |

| No. | Title                                                                                                                                                                                                                  | COVID-19-related publication = 0<br>non-COVID-19 publication = 1 | Document type      | Number of citations in 2021 |
|-----|------------------------------------------------------------------------------------------------------------------------------------------------------------------------------------------------------------------------|------------------------------------------------------------------|--------------------|-----------------------------|
| 125 | A primary care alternative to a hospital-based approach to COVID-19 in India                                                                                                                                           | 0                                                                | Editorial Material | 3                           |
| 126 | The role of smoke from cooking indoors over an open flame and parental smoking on the risk of cleft lip and palate: A case- control study in 7 low-resource countries                                                  | 1                                                                | Article            | 2                           |
| 127 | Basic maternal health care coverage among adolescents in 22 sub-Saharan African countries with high adolescent birth rate                                                                                              | 1                                                                | Article            | 2                           |
| 128 | Early prediction and identification for severe patients during the pandemic of COVID-19: A severe COVID-19 risk model constructed by multivariate logistic regression analysis                                         | 0                                                                | Article            | 9                           |
| 129 | Masculinities and violence: using latent class analysis to investigate the origins and correlates of differences between men in the cross-sectional UN Multi-country Study on men and violence in Asia and the Pacific | 1                                                                | Article            | 2                           |
| 130 | COVID-19 in Greece: People take precedence over economics                                                                                                                                                              | 0                                                                | Editorial Material | 0                           |
| 131 | Systematic review estimating the burden of dementia in the WHO Southeast Asia Region using Bayesian and frequentist approaches                                                                                         | 1                                                                | Review             | 2                           |
| 132 | Optimizing the diagnostic capacity for COVID-19 PCR testing for low resource and high demand settings: The development of information-dependent pooling protocol                                                       | 0                                                                | Article            | 2                           |
| 133 | Influenza vaccination strategies for 2020-21 in the context of COVID-19                                                                                                                                                | 0                                                                | Review             | 5                           |
| 134 | COVID-19 in Ethiopia: A contextual approach to explaining its slow growth                                                                                                                                              | 0                                                                | Editorial Material | 1                           |
| 135 | COVID-19 in Canada: A self-assessment and review of preparedness and response                                                                                                                                          | 0                                                                | Editorial Material | 1                           |
| 136 | The utility of a structured mentorship program for enhancing competencies in global health                                                                                                                             | 1                                                                | Editorial Material | 0                           |
| 137 | Reaching further by Village Health Collaborators: The informal health taskforce of Vietnam for COVID-19 responses                                                                                                      | 0                                                                | Editorial Material | 23                          |
| 138 | Are people in the bush really physically active? A systematic review and meta-analysis of physical activity and sedentary behaviour in rural Australians populations                                                   | 1                                                                | Review             | 0                           |

| No. | Title                                                                                                                                                                                  | COVID-19-related publication = 0<br>non-COVID-19 publication = 1 | Document type      | Number of citations in 2021 |
|-----|----------------------------------------------------------------------------------------------------------------------------------------------------------------------------------------|------------------------------------------------------------------|--------------------|-----------------------------|
| 139 | Fighting COVID-19 with water                                                                                                                                                           | 0                                                                | Editorial Material | 7                           |
| 140 | E-pharmacies in India: Can they improve the pharmaceutical service delivery?                                                                                                           | 1                                                                | Editorial Material | 2                           |
| 141 | Gender-based violence during the COVID-19 pandemic response in Italy                                                                                                                   | 0                                                                | Editorial Material | 3                           |
| 142 | How to safely and smoothly resume trials after the COVID-19 outbreak                                                                                                                   | 0                                                                | Editorial Material | 0                           |
| 143 | The operational readiness capacities of the grassroots health system in responses to epidemics: Implications for COVID-9 control in Vietnam                                            | 0                                                                | Article            | 19                          |
| 144 | COVID-19: Could India still escape?                                                                                                                                                    | 0                                                                | Editorial Material | 1                           |
| 145 | What's the way out? Potential exit strategies from the COVID-19 lockdown                                                                                                               | 0                                                                | Editorial Material | 11                          |
| 146 | Beyond handwashing: Water insecurity undermines COVID-19 response in developing areas                                                                                                  | 0                                                                | Editorial Material | 12                          |
| 147 | Evaluating coverage of maternal syphilis screening and treatment within antenatal care to guide service improvements for prevention of congenital syphilis in Countdown 2030 Countries | 1                                                                | Article            | 1                           |
| 148 | The case for compulsory licensing during COVID-19                                                                                                                                      | 0                                                                | Editorial Material | 8                           |
| 149 | Establishment of a hospital-based health care workers surveillance programme to keep them safe during the COVID-19 pandemic                                                            | 0                                                                | Editorial Material | 0                           |
| 150 | The development and implementation of an oxygen treatment solution for health facilities in low and middle-income countries                                                            | 1                                                                | Article            | 1                           |
| 151 | Immediate impact of COVID-19 on mental health and its associated factors among healthcare workers: A global perspective across 31 countries                                            | 0                                                                | Editorial Material | 11                          |
| 152 | Trends, patterns and health consequences of multimorbidity among South Korea adults: Analysis of nationally representative survey data 2007-2016                                       | 1                                                                | Article            | 3                           |
| 153 | Reporting guidelines should be free to publish, read, and use                                                                                                                          | 1                                                                | Editorial Material | 1                           |

| No. | Title                                                                                                                                                               | COVID-19-related publication = 0<br>non-COVID-19 publication = 1 | Document type      | Number of citations in 2021 |
|-----|---------------------------------------------------------------------------------------------------------------------------------------------------------------------|------------------------------------------------------------------|--------------------|-----------------------------|
| 154 | Estimation of unreported SARS-CoV-2 cases in Italy using a Susceptible-Exposed-Infectious-Recovered-Dead model                                                      | 0                                                                | Article            | 3                           |
| 155 | Decreasing child death from diarrhoea requires more focus on poor hygiene                                                                                           | 1                                                                | Editorial Material | 0                           |
| 156 | Epidemic and control of COVID-19 in Niger: quantitative analyses in a least developed country                                                                       | 0                                                                | Article            | 5                           |
| 157 | Incidence of respiratory syncytial virus related health care utilization in the United States                                                                       | 1                                                                | Article            | 3                           |
| 158 | Informing policy makers on the efficiency of population level tobacco control interventions in Asia: A systematic review of model-based economic evaluations        | 1                                                                | Review             | 0                           |
| 159 | Physical activity and COVID-19: an observational and Mendelian randomisation study                                                                                  | 0                                                                | Article            | 11                          |
| 160 | COVID-19: Universal health coverage now more than ever                                                                                                              | 0                                                                | Editorial Material | 8                           |
| 161 | Risk factors for Epstein Barr virus-associated cancers: a systematic review, critical appraisal, and mapping of the epidemiological evidence                        | 1                                                                | Review             | 12                          |
| 162 | Addressing the gaps in mental health care for internally displaced persons                                                                                          | 1                                                                | Editorial Material | 0                           |
| 163 | Assessment of the preparedness of the Ugandan health care system to tackle more COVID-19 cases                                                                      | 0                                                                | Editorial Material | 1                           |
| 164 | The collateral damage of the COVID-19 pandemic on surgical health care in sub-Saharan Africa                                                                        | 0                                                                | Editorial Material | 2                           |
| 165 | Need for more proactive use of pharmacists in the COVID-19 pandemic following lessons learnt from the Great East Japan Earthquake                                   | 0                                                                | Editorial Material | 1                           |
| 166 | Correcting the pandemic: Analysis of corrections to journal articles on COVID-19 and Ebola                                                                          | 0                                                                | Editorial Material | 1                           |
| 167 | Learning from tuberculosis: COVID-19 highlights the need for more robust infection control policy                                                                   | 0                                                                | Editorial Material | 1                           |
| 168 | COVID-19 in the elderly: A Malaysian perspective                                                                                                                    | 0                                                                | Editorial Material | 5                           |
| 169 | Covering the last mile for vaccination: Feasibility and acceptability of traditional birth attendant-based referral system in hard-to-reach areas in rural Pakistan | 1                                                                | Article            | 0                           |
| 170 | SARS-CoV-2-related pneumonia cases in pneumonia picture in Russia in March-May 2020: Secondary bacterial                                                            | 0                                                                | Article            | 11                          |

| No. | Title                                                                                                                                                                              | COVID-19-related publication = 0<br>non-COVID-19 publication = 1 | Document type      | Number of citations in 2021 |
|-----|------------------------------------------------------------------------------------------------------------------------------------------------------------------------------------|------------------------------------------------------------------|--------------------|-----------------------------|
|     | pneumonia and viral co-infections                                                                                                                                                  |                                                                  |                    |                             |
| 171 | Universal health coverage in the framework of the 2030 global agenda for sustainable development: agreements and challenges                                                        | 1                                                                | Editorial Material | 1                           |
| 172 | National user fee abolition and health insurance scheme in Burkina Faso: How can they be integrated on the road to universal health coverage without increasing health inequities? | 1                                                                | Editorial Material | 2                           |
| 173 | Human rights and global health emergencies preparedness                                                                                                                            | 1                                                                | Editorial Material | 0                           |
| 174 | Impact of coronavirus outbreak on psychological health                                                                                                                             | 0                                                                | Editorial Material | 55                          |
| 175 | Antimicrobial resistance and over the counter use of drugs in Nepal                                                                                                                | 1                                                                | Editorial Material | 6                           |
| 176 | Topical emollient therapy in the management of severe acute malnutrition in children under two: A randomized controlled clinical trial in Bangladesh                               | 1                                                                | Article            | 4                           |
| 177 | Middle-East OBGYN Graduate Education (MOGGE) Foundation Practice Guidelines: Prelabor rupture of membranes; Practice guideline No. 01-O-19                                         | 1                                                                | Editorial Material | 4                           |
| 178 | Psychosocial interventions for intimate partner violence in low and middle income countries: A meta-analysis of randomised controlled trials                                       | 1                                                                | Article            | 1                           |
| 179 | Simple technology for COVID-19 medical solid waste treatment in low-resourced settings                                                                                             | 0                                                                | Editorial Material | 2                           |
| 180 | Nigeria's public health response to the COVID-19 pandemic: January to May 2020                                                                                                     | 0                                                                | Editorial Material | 10                          |
| 181 | Epidemiological characteristics and trends of notifiable infectious diseases in China from 1986 to 2016                                                                            | 1                                                                | Article            | 5                           |
| 182 | Modeling the future of cancer registration and research: The Martinique Cancer Data Hub Platform                                                                                   | 1                                                                | Editorial Material | 0                           |
| 183 | Mortality in India established through verbal autopsies (MINerVA): Strengthening national mortality surveillance system in India                                                   | 1                                                                | Article            | 0                           |
| 184 | Best practices in global health evaluation: Reflections on learning from an independent program analysis in Bihar, India                                                           | 1                                                                | Editorial Material | 0                           |

| No. | Title                                                                                                                                                                 | COVID-19-related publication = 0<br>non-COVID-19 publication = 1 | Document type      | Number of citations in 2021 |
|-----|-----------------------------------------------------------------------------------------------------------------------------------------------------------------------|------------------------------------------------------------------|--------------------|-----------------------------|
| 185 | Applicability of the WHO maternal near-miss tool: A nationwide surveillance study in Suriname                                                                         | 1                                                                | Article            | 4                           |
| 186 | Protecting health care workers in the front line: Innovation in COVID-19 pandemic                                                                                     | 0                                                                | Editorial Material | 14                          |
| 187 | Retraction and republication: The roles of a Grandmother in African societies - please do not send them to old people's homes                                         | 1                                                                | Editorial Material | 0                           |
| 188 | Breaking the cycle of the COVID-19 transmission: A challenge for Nigeria                                                                                              | 0                                                                | Editorial Material | 1                           |
| 189 | Antenatal screening practices in the WHO European Region: a mixed methods study                                                                                       | 1                                                                | Article            | 1                           |
| 190 | Mandatory universal masking is the key to stop COVID-19                                                                                                               | 0                                                                | Editorial Material | 0                           |
| 191 | Community health worker-based mobile health (mHealth) approaches for improving management and caregiver knowledge of common childhood infections: A systematic review | 1                                                                | Review             | 1                           |
| 192 | Health layering of self-help groups: impacts on reproductive, maternal, newborn and child health and nutrition in Bihar, India                                        | 1                                                                | Article            | 1                           |
| 193 | Evaluation of global health capacity building initiatives in low-and middle-income countries: A systematic review                                                     | 1                                                                | Review             | 1                           |
| 194 | Lessons from COVID-19 pandemic for the child survival agenda                                                                                                          | 0                                                                | Editorial Material | 0                           |
| 195 | Evaluation of a large-scale reproductive, maternal newborn and child health and nutrition program in Bihar, India, through an equity lens                             | 1                                                                | Article            | 0                           |
| 196 | Burden of influenza-associated respiratory and circulatory mortality in India, 2010-2013                                                                              | 1                                                                | Article            | 9                           |
| 197 | A systematic review of interventions addressing limited health literacy to improve asthma self-management                                                             | 1                                                                | Review             | 3                           |
| 198 | COVID-19 among health workers in Brazil: The silent wave                                                                                                              | 0                                                                | Editorial Material | 4                           |
| 199 | To fast or not to fast: Lipid measurement and cardiovascular disease risk estimation in rural sub-Saharan Africa                                                      | 1                                                                | Article            | 0                           |
| 200 | An application of ARIMA model for predicting total health expenditure in China from 1978-2022                                                                         | 1                                                                | Article            | 8                           |
| 201 | Impact of the Ananya program on reproductive, maternal, newborn and child health and nutrition in Bihar, India: early                                                 | 1                                                                | Article            | 1                           |

| No. | Title                                                                                                                                                     | COVID-19-related publication = 0<br>non-COVID-19 publication = 1 | Document type      | Number of citations in 2021 |
|-----|-----------------------------------------------------------------------------------------------------------------------------------------------------------|------------------------------------------------------------------|--------------------|-----------------------------|
|     | results from a quasi-experimental study                                                                                                                   |                                                                  |                    |                             |
| 202 | The impact of women's empowerment on their children's early development in 26 African countries                                                           | 1                                                                | Article            | 2                           |
| 203 | COVID-19 in Malaysia: Crucial measures in critical times                                                                                                  | 0                                                                | Editorial Material | 7                           |
| 204 | COVID-19 pandemic: The African paradox                                                                                                                    | 0                                                                | Editorial Material | 17                          |
| 205 | Addressing methodological and ethical issues in practicing health economic evaluation in China                                                            | 1                                                                | Editorial Material | 1                           |
| 206 | Surgery and universal health coverage: Designing an essential package for surgical care expansion and scale-up                                            | 1                                                                | Editorial Material | 1                           |
| 207 | Home based dialysis systems in developing countries                                                                                                       | 1                                                                | Editorial Material | 0                           |
| 208 | Civil society's response to emerging public health events in China                                                                                        | 1                                                                | Editorial Material | 1                           |
| 209 | Global COVID-19: Warnings and suggestions based on experience of China                                                                                    | 0                                                                | Article            | 7                           |
| 210 | Government public health intelligence units: bridging the data to policy gap                                                                              | 1                                                                | Editorial Material | 0                           |
| 211 | Access, demand, and utilization of childhood immunization services: A cross-sectional household survey in Western Area Urban district, Sierra Leone, 2019 | 1                                                                | Article            | 2                           |
| 212 | Increasing health insurance enrolment in the informal economic sector                                                                                     | 1                                                                | Editorial Material | 1                           |
| 213 | Contributing to health training in low and middle income countries - global health programmes' responsibility to be sustainable and impactful             | 1                                                                | Editorial Material | 0                           |
| 214 | First Rwanda National Trauma Symposium 2019: Challenges and priorities                                                                                    | 1                                                                | News Item          | 0                           |
| 215 | A cascade of causes that led to the COVID-19 tragedy in Italy and in other European Union countries                                                       | 0                                                                | Editorial Material | 15                          |
| 216 | Indian higher education and youth mental health: Challenges and opportunities                                                                             | 1                                                                | Editorial Material | 0                           |
| 217 | COVID-19 in Myanmar: Spread, actions and opportunities for peace and stability                                                                            | 0                                                                | Editorial Material | 0                           |
| 218 | Burdening the poor: Extreme responses to COVID-19 in India and the Southeastern United States                                                             | 0                                                                | Editorial Material | 1                           |
| 219 | What is the evidence for transmission of COVID-19 by children in schools? A living systematic review                                                      | 0                                                                | Article            | 11                          |

| No. | Title                                                                                                                                                                                                                                               | COVID-19-related publication = 0<br>non-COVID-19 publication = 1 | Document type      | Number of citations in 2021 |
|-----|-----------------------------------------------------------------------------------------------------------------------------------------------------------------------------------------------------------------------------------------------------|------------------------------------------------------------------|--------------------|-----------------------------|
| 220 | Challenges to testing COVID-19 in conflict zones: Yemen as an example                                                                                                                                                                               | 0                                                                | Editorial Material | 8                           |
| 221 | Determinants and patterns of care-seeking for childhood illness in rural Pune District, India                                                                                                                                                       | 1                                                                | Article            | 2                           |
| 222 | Answering the initial 20 questions on COVID-19 (January-February 2020)                                                                                                                                                                              | 0                                                                | Editorial Material | 1                           |
| 223 | At a crossroads: How can Nepal enhance its community health care system to achieve Sustainable Development Goal 3 and universal health coverage?                                                                                                    | 1                                                                | Editorial Material | 0                           |
| 224 | Do household asset wealth measurements depend on who is surveyed? Asset reporting concordance within multi-adult households in rural Uganda                                                                                                         | 1                                                                | Article            | 9                           |
| 225 | Using a mobile nurse mentoring and training program to address a health workforce capacity crisis in Bihar, India: Impact on essential intrapartum and newborn care practices                                                                       | 1                                                                | Article            | 0                           |
| 226 | National COVID-19 lockdown exit strategies need to pay more attention to community engagement and workplace safety                                                                                                                                  | 0                                                                | Editorial Material | 1                           |
| 227 | Addressing COVID-19 in Afghanistan: What are the efforts and challenges?                                                                                                                                                                            | 0                                                                | Editorial Material | 10                          |
| 228 | Medical student perceptions of working in clinical environments during the COVID-19 pandemic                                                                                                                                                        | 0                                                                | Editorial Material | 1                           |
| 229 | A proposal to make the pulse oximetry as omnipresent as thermometry in public health care systems                                                                                                                                                   | 1                                                                | Editorial Material | 3                           |
| 230 | Effects of therapeutic zinc supplementation for diarrhea and two preventive zinc supplementation regimens on the incidence and duration of diarrhea and acute respiratory tract infections in rural Laotian children: A randomized controlled trial | 1                                                                | Article            | 3                           |
| 231 | Evaluation of the relationship between cognitive impairment and suboptimal health status in a northern Chinese population: a cross-sectional study                                                                                                  | 1                                                                | Article            | 3                           |
| 232 | Socio-emotional challenges and development of children left behind by migrant mothers                                                                                                                                                               | 1                                                                | Article            | 3                           |
| 233 | The importance of improving intervention coverage measurement for ensuring all women, children and adolescents are reached with the health care services they need                                                                                  | 1                                                                | Editorial Material | 0                           |



| No. | Title                                                                                                                        | COVID-19-related publication = 0<br>non-COVID-19 publication = 1 | Document type      | Number of citations in 2021 |
|-----|------------------------------------------------------------------------------------------------------------------------------|------------------------------------------------------------------|--------------------|-----------------------------|
| 234 | Political challenges to prioritizing gender in global health organisations                                                   | 1                                                                | Article            | 3                           |
| 235 | Applying a gender lens to global health and well-being: Framing a Journal of Global Health special collection                | 1                                                                | Editorial Material | 0                           |
| 236 | Continuum of care approach for managing non-communicable diseases in low- and middle-income countries                        | 1                                                                | Editorial Material | 0                           |
| 237 | Impact of the COVID-19 pandemic on global health research training and education                                             | 0                                                                | Editorial Material | 0                           |
| 238 | To wear or not to wear a mask in the COVID-19 era? The broken bridge between recommendations and implementation in Lebanon   | 0                                                                | Editorial Material | 1                           |
| 239 | Global health: Global health diplomacy                                                                                       | 1                                                                | Editorial Material | 0                           |
| 240 | Achieving Sustainable Development Goal 3 on health from global pharmacy workforce                                            | 1                                                                | Editorial Material | 0                           |
| 241 | Community health workers in humanitarian settings: Scoping review                                                            | 1                                                                | Review             | 4                           |
| 242 | How prepared is Brazil to tackle the COVID-19 disease?                                                                       | 0                                                                | Editorial Material | 2                           |
| 243 | Early epidemiological indicators, outcomes, and interventions of COVID-19 pandemic: A systematic review                      | 0                                                                | Review             | 15                          |
| 244 | Reframing infection control approaches in low-resource health care settings: A nod to the emic perspective                   | 1                                                                | Editorial Material | 0                           |
| 245 | How Japan managed to curb the pandemic early on: Lessons learned from the first eight months of COVID-19                     | 0                                                                | Editorial Material | 1                           |
| 246 | COVID-19 must catalyse key global natural experiments                                                                        | 0                                                                | Editorial Material | 2                           |
| 247 | Analysis of public engagement with ten major global health topics on a social network profile and a newspaper website        | 1                                                                | Article            | 2                           |
| 248 | Warning from Canada: Latin America, South Africa and India may face an opioid epidemic in the coming years                   | 1                                                                | Editorial Material | 3                           |
| 249 | Rapid assessment of COVID-19 suspected cases: A community based approach for developing countries like Pakistan              | 0                                                                | Editorial Material | 1                           |
| 250 | Improving the utilization of essential public health services by Chinese elderly migrants: strategies and policy implication | 1                                                                | Article            | 4                           |
| 251 | Impact of routine vaccination against Haemophilus influenzae type b in The Gambia: 20 years after its introduction           | 1                                                                | Article            | 1                           |
| 252 | Mixed and blended emotional reactions to 2014 Ebola outbreak                                                                 | 1                                                                | Editorial Material | 0                           |

| No. | Title                                                                                                                                                                                                           | COVID-19-related publication = 0<br>non-COVID-19 publication = 1 | Document type      | Number of citations in 2021 |
|-----|-----------------------------------------------------------------------------------------------------------------------------------------------------------------------------------------------------------------|------------------------------------------------------------------|--------------------|-----------------------------|
| 253 | Geospatial variations in trends of reproductive, maternal, newborn and child health and nutrition indicators at block level in Bihar, India, during scale-up of Ananya program interventions                    | 1                                                                | Article            | 0                           |
| 254 | Earthquake rebuilding and response to COVID-19 in Nepal, a country nestled in multiple crises                                                                                                                   | 0                                                                | Editorial Material | 6                           |
| 255 | Concerns of HIV-positive migrant workers in COVID-19 pandemic: A call for action                                                                                                                                | 0                                                                | Editorial Material | 4                           |
| 256 | Healthcare worker attendance during the early stages of the COVID-19 pandemic: A longitudinal analysis of fingerprint-verified data from all public-sector secondary and tertiary care facilities in Bangladesh | 0                                                                | Article            | 1                           |
| 257 | Early psychological impact of the 2019 coronavirus disease (COVID-19) pandemic and lockdown in a large Spanish sample                                                                                           | 0                                                                | Article            | 19                          |
| 258 | Risk of congenital birth defects during COVID-19 pandemic: Draw attention to the physicians and policymakers                                                                                                    | 0                                                                | Editorial Material | 1                           |
| 259 | An analysis of death trends in Argentina, 1990-2017, with emphasis on the effects of economic crises                                                                                                            | 1                                                                | Article            | 0                           |
| 260 | Implementation of the International Health Regulations in Somaliland supports multisectoral response to COVID-19                                                                                                | 0                                                                | Editorial Material | 0                           |
| 261 | Impact of mHealth interventions for reproductive, maternal, newborn and child health and nutrition at scale: BBC Media Action and the Ananya program in Bihar, India                                            | 1                                                                | Article            | 3                           |
| 262 | Effective approaches to public engagement with global health topics                                                                                                                                             | 1                                                                | Article            | 3                           |
| 263 | COVID-19 in Egypt: Uncovered figures or a different situation?                                                                                                                                                  | 0                                                                | Editorial Material | 15                          |
| 264 | Addressing smokeless tobacco use and building research capacity in South Asia (ASTRA)                                                                                                                           | 1                                                                | Editorial Material | 2                           |
| 265 | The emergence of a One Health workforce: At the crossroads of technology innovation and frontline health workers                                                                                                | 1                                                                | Editorial Material | 0                           |
| 266 | In the COVID-19 era, let's keep an eye on clinical trials in Africa                                                                                                                                             | 0                                                                | Editorial Material | 0                           |
| 267 | Engaging with stakeholders in a research programme to promote implementation of pulmonary rehabilitation in Bangladesh: Challenges and opportunities                                                            | 1                                                                | Editorial Material | 2                           |
| 268 | Investigation of 100 SARS-CoV-2 infected families in Wuhan: Transmission patterns and follow-up                                                                                                                 | 0                                                                | Article            | 0                           |

| No. | Title                                                                                                                                                                                                         | COVID-19-related publication = 0<br>non-COVID-19 publication = 1 | Document type      | Number of citations in 2021 |
|-----|---------------------------------------------------------------------------------------------------------------------------------------------------------------------------------------------------------------|------------------------------------------------------------------|--------------------|-----------------------------|
| 269 | Estimating malaria chemoprevention and vector control coverage using program and campaign data: A scoping review of current practices and opportunities                                                       | 1                                                                | Review             | 0                           |
| 270 | Benchmarking national action plans on antimicrobial resistance in eight selected LMICs: Focus on the veterinary sector strategies                                                                             | 1                                                                | Article            | 0                           |
| 271 | Fertility is a key predictor of the double burden of malnutrition among women of child-bearing age in sub-Saharan Africa                                                                                      | 1                                                                | Article            | 1                           |
| 272 | Strategies and implications for improving the cure rate of Novel Coronavirus Pneumonia in Wuhan                                                                                                               | 1                                                                | Editorial Material | 0                           |
| 273 | Early childhood suspected developmental delay in 63 low- and middle-income countries: Large within- and between-country inequalities documented using national health surveys                                 | 1                                                                | Article            | 10                          |
| 274 | An evidence-based framework for priority clinical research questions for COVID-19                                                                                                                             | 0                                                                | Article            | 7                           |
| 275 | The disease burden of childhood asthma in China: a systematic review and meta-analysis                                                                                                                        | 1                                                                | Review             | 9                           |
| 276 | Successful flattening of COVID-19 epidemiological curve in Jordan                                                                                                                                             | 0                                                                | Editorial Material | 1                           |
| 277 | The ethical dilemma of ventilator sharing during the COVID-19 pandemic                                                                                                                                        | 0                                                                | Editorial Material | 1                           |
| 278 | Fighting the COVID-19 pandemic using the technology-based second-line in Italy and Lombardy: The urgent need of home-based remote monitoring systems to avoid the collapse of the hospital-centred first line | 0                                                                | Editorial Material | 1                           |
| 279 | HIV-related stigma trends in the general population of India during an era of antiretroviral treatment expansion, 2005-16                                                                                     | 1                                                                | Article            | 0                           |
| 280 | Integrated multisectoral non-communicable disease prevention and control in China: A review of agencies and policies                                                                                          | 1                                                                | Editorial Material | 1                           |
| 281 | Specific skill training for low-resource countries: A perspective from a broad workforce development project in Afghanistan                                                                                   | 1                                                                | Editorial Material | 0                           |
| 282 | Bugs as Drugs, potential self-regenerated innovative cancer therapeutics approach for global health                                                                                                           | 1                                                                | Editorial Material | 0                           |

| No. | Title                                                                                                                                                                                  | COVID-19-related publication = 0<br>non-COVID-19 publication = 1 | Document type      | Number of citations in 2021 |
|-----|----------------------------------------------------------------------------------------------------------------------------------------------------------------------------------------|------------------------------------------------------------------|--------------------|-----------------------------|
| 283 | Advancing the measurement agenda for menstrual health and hygiene interventions in low- and middle-income countries                                                                    | 1                                                                | Editorial Material | 1                           |
| 284 | Predictors of Epstein-Barr virus serostatus and implications for vaccine policy: A systematic review of the literature                                                                 | 1                                                                | Review             | 3                           |
| 285 | A cautionary note on the association between meteorological parameters and COVID-19 pandemic                                                                                           | 0                                                                | Editorial Material | 0                           |
| 286 | Influencing factors of SARS-CoV2 spread in Africa                                                                                                                                      | 0                                                                | Editorial Material | 1                           |
| 287 | COVID 19 and BAME health care staff: Wrong place at the wrong time                                                                                                                     | 0                                                                | Editorial Material | 7                           |
| 288 | Online keyword searching in three countries and languages reflects different perceptions and behaviors in response to the name of the novel coronavirus disease                        | 1                                                                | Editorial Material | 0                           |
| 289 | Estimating transportation role in pandemic diffusion in Nigeria: A consideration of 1918-19 influenza and COVID-19 pandemics                                                           | 0                                                                | Article            | 2                           |
| 290 | Realizing the potential of embedded implementation research: Lessons from Pakistan                                                                                                     | 1                                                                | Editorial Material | 1                           |
| 291 | Building an interdisciplinary pain medicine and palliative care program in Ethiopia                                                                                                    | 1                                                                | Editorial Material | 0                           |
| 292 | The PEGASUS Conferences: A unique avenue to bridge evidence and action                                                                                                                 | 1                                                                | News Item          | 1                           |
| 293 | Helping global health topics go viral online                                                                                                                                           | 1                                                                | Editorial Material | 0                           |
| 294 | A systematic analysis of online public engagement with 10 videos on major global health topics involving 229 459 global online viewers                                                 | 1                                                                | Article            | 0                           |
| 295 | The prevalence, patterning and associations with depressive symptoms and self-rated health of emotional and economic intimate partner violence: a three-country population based study | 1                                                                | Article            | 2                           |
| 296 | Seven pillars for ethics in digital diagnostic assistance among clinicians: Take-homes from a multi-stakeholder and multi-country workshop                                             | 1                                                                | Editorial Material | 1                           |
| 297 | The role of viral co-infections in the severity of acute respiratory infections among children infected with respiratory                                                               | 1                                                                | Review             | 6                           |

| No. | Title                                                                                                                                                                    | COVID-19-related publication = 0<br>non-COVID-19 publication = 1 | Document type      | Number of citations in 2021 |
|-----|--------------------------------------------------------------------------------------------------------------------------------------------------------------------------|------------------------------------------------------------------|--------------------|-----------------------------|
|     | syncytial virus (RSV): A systematic review and meta-analysis                                                                                                             |                                                                  |                    |                             |
| 298 | Validating a GPS-based approach to detect health facility visits against maternal response to prompted recall survey                                                     | 1                                                                | Article            | 1                           |
| 299 | Assessing community health worker service delivery in humanitarian settings                                                                                              | 1                                                                | Editorial Material | 4                           |
| 300 | Novel approaches to estimate compliance with lockdown measures in the COVID-19 pandemic                                                                                  | 0                                                                | Editorial Material | 10                          |
| 301 | Trends in reproductive, maternal, newborn and child health and nutrition indicators during five years of piloting and scaling-up of Ananya interventions in Bihar, India | 1                                                                | Article            | 1                           |
| 302 | Mobilizing medical students for COVID-19 responses: Experience of Vietnam                                                                                                | 0                                                                | Editorial Material | 11                          |
| 303 | Clinical nutrition care challenges in low-resource settings during the COVID-19 pandemic: A focus on Malawi                                                              | 0                                                                | Editorial Material | 2                           |
| 304 | Statewide implementation of a quality improvement initiative for reproductive, maternal, newborn and child health and nutrition in Bihar, India                          | 1                                                                | Article            | 0                           |
| 305 | SWPER Global: A survey-based women's empowerment index expanded from Africa to all low- and middle-income countries                                                      | 1                                                                | Article            | 8                           |
| 306 | Developing a three-dimensional narrative to counter polio vaccine refusal in Charsadda                                                                                   | 1                                                                | Article            | 3                           |
| 307 | Precision-weighted estimates of neonatal, post-neonatal and child mortality for 640 districts in India, National Family Health Survey 2016                               | 1                                                                | Article            | 2                           |
| 308 | Social mobilization campaign to tackle immunization hesitancy in Sargodha and Khushab districts of Pakistan                                                              | 1                                                                | Article            | 2                           |
| 309 | Maternity and child care amidst COVID-19 Pandemic: A forgotten agenda                                                                                                    | 0                                                                | Editorial Material | 1                           |
| 310 | Factors influencing the sustainability of digital health interventions in low-resource settings: Lessons from five countries                                             | 1                                                                | Editorial Material | 0                           |
| 311 | COVID-19: Obesity, deprivation and death                                                                                                                                 | 0                                                                | Editorial Material | 4                           |
| 312 | Alcohol consumption: An important epidemiological factor in COVID-19?                                                                                                    | 0                                                                | Editorial Material | 1                           |

| No. | Title                                                                                                                                                                                     | COVID-19-related publication = 0<br>non-COVID-19 publication = 1 | Document type      | Number of citations in 2021 |
|-----|-------------------------------------------------------------------------------------------------------------------------------------------------------------------------------------------|------------------------------------------------------------------|--------------------|-----------------------------|
| 313 | COVID-19 in Bangladesh: Data deficiency to delayed decision                                                                                                                               | 0                                                                | Editorial Material | 4                           |
| 314 | Ophthalmic manifestations of novel coronaviruses: precautionary measures and diagnostic possibilities                                                                                     | 1                                                                | Editorial Material | 1                           |
| 315 | Nicaragua's surprising response to COVID-19                                                                                                                                               | 0                                                                | Editorial Material | 3                           |
| 316 | Reopening schools after the COVID-19 lockdown                                                                                                                                             | 0                                                                | Editorial Material | 21                          |
| 317 | Effective coverage for hypertension treatment among middle-aged adults and the older population in China, 2011 to 2013: A nationwide longitudinal study                                   | 1                                                                | Article            | 0                           |
| 318 | High value of rapid diagnostic tests to diagnose malaria within children: A systematic review meta-analysis                                                                               | 1                                                                | Review             | 3                           |
| 319 | How to control the economic burden of treating cardio-cerebrovascular diseases in China? Assessment based on System of Health Accounts 2011                                               | 1                                                                | Article            | 1                           |
| 320 | Access to modern methods of contraception in Italy: Will the COVID-19 pandemic be aggravating the issue?                                                                                  | 0                                                                | Editorial Material | 0                           |
| 321 | Mitigation of COVID-19 clusters in Malaysia                                                                                                                                               | 0                                                                | Editorial Material | 3                           |
| 322 | Determination of the emergency phase for response against endemic disease outbreak: A case of Lassa fever outbreak in Nigeria                                                             | 1                                                                | Editorial Material | 3                           |
| 323 | Health impact of self-help groups scaled-up statewide in Bihar, India                                                                                                                     | 1                                                                | Article            | 0                           |
| 324 | What is the optimal length of an Online Forward Triage Tool? The need for a framework                                                                                                     | 1                                                                | Editorial Material | 0                           |
| 325 | SARS-CoV-2 in Malawi: Are we sacrificing the Youth in sub-Saharan Africa?                                                                                                                 | 0                                                                | Editorial Material | 0                           |
| 326 | Imagining a lean and agile digital health ecosystem - a measure of pandemic responsiveness                                                                                                | 0                                                                | Editorial Material | 0                           |
| 327 | Use of a participatory quality assessment and improvement tool for maternal and neonatal hospital care. Part 2: Review of the results of quality cycles and of factors influencing change | 1                                                                | Review             | 0                           |
| 328 | Undertesting of COVID-19 in Indonesia: what has gone wrong?                                                                                                                               | 0                                                                | Editorial Material | 5                           |
| 329 | Improved child marriage laws and its association with changing attitudes and experiences of intimate partner violence: a                                                                  | 1                                                                | Article            | 4                           |

| No. | Title                                                                                                                                                                                                                | COVID-19-related publication = 0<br>non-COVID-19 publication = 1 | Document type      | Number of citations in 2021 |
|-----|----------------------------------------------------------------------------------------------------------------------------------------------------------------------------------------------------------------------|------------------------------------------------------------------|--------------------|-----------------------------|
|     | comparative multi-national study                                                                                                                                                                                     |                                                                  |                    |                             |
| 330 | Empowering women through probiotic fermented food in East Africa                                                                                                                                                     | 1                                                                | Editorial Material | 2                           |
| 331 | Variance estimation for effective coverage measures: A simulation study                                                                                                                                              | 1                                                                | Article            | 4                           |
| 332 | World Health Organization simulations: an increasingly popular learning tool for the development of future global health practitioners                                                                               | 1                                                                | Editorial Material | 1                           |
| 333 | Occupational health and safety in China: From emergency response to Jiangsu chemical explosion to long-term governance improvement                                                                                   | 1                                                                | Editorial Material | 0                           |
| 334 | National Sample Vital Registration System: A sustainable platform for COVID-19 and other infectious diseases surveillance in low and middle-income countries                                                         | 0                                                                | Editorial Material | 1                           |
| 335 | Preparedness to face the COVID-19 pandemic - is India missing the mark?                                                                                                                                              | 0                                                                | Editorial Material | 0                           |
| 336 | The research output on interventions for the behavioural risk factors alcohol & drug use and dietary risk is not related to their respective burden of ill health in countries at differing World Bank income levels | 1                                                                | Article            | 0                           |
| 337 | Simulation and team training embedded nurse mentoring programme and improvement in intrapartum and newborn care in a low-resource setting in Bihar, India                                                            | 1                                                                | Article            | 0                           |
| 338 | Verbal/social autopsy analysis of causes and determinants of under-5 mortality in Tanzania from 2010 to 2016                                                                                                         | 1                                                                | Article            | 2                           |
| 339 | Global RECHARGE: Establishing a standard international data set for pulmonary rehabilitation in low- and middle-income countries                                                                                     | 1                                                                | Editorial Material | 3                           |
| 340 | Nigeria, COVID-19 and the dearth of health workers                                                                                                                                                                   | 0                                                                | Editorial Material | 0                           |
| 341 | Can the COVID-19 pandemic boost the global adoption and usage of eHealth solutions?                                                                                                                                  | 0                                                                | Editorial Material | 1                           |
| 342 | Leaving no one behind: Towards equitable global elimination of hepatitis C                                                                                                                                           | 1                                                                | Editorial Material | 0                           |
| 343 | Collective pharmaceutical procurement in China may have unintended consequences in supply and pricing                                                                                                                | 1                                                                | Editorial Material | 1                           |

| No. | Title                                                                                                | COVID-19-related publication = 0<br>non-COVID-19 publication = 1 | Document type      | Number of citations in 2021 |
|-----|------------------------------------------------------------------------------------------------------|------------------------------------------------------------------|--------------------|-----------------------------|
| 344 | Association of collective attitudes and contraceptive practice in nine sub-Saharan African countries | 1                                                                | Article            | 5                           |
| 345 | G20 Okayama Health Ministers' Meeting: Conclusions and commitments                                   | 1                                                                | Editorial Material | 4                           |

**Data source:** Web of Science



**Table S17 List of articles published in *Lancet Global Health* in 2020**

| No. | Title                                                                                                                                                                                                                                   | COVID-19-related publication = 0<br>non-COVID-19 publication = 1 | Document type | Number of citations in 2021 |
|-----|-----------------------------------------------------------------------------------------------------------------------------------------------------------------------------------------------------------------------------------------|------------------------------------------------------------------|---------------|-----------------------------|
| 1   | Feasibility of controlling COVID-19 outbreaks by isolation of cases and contacts                                                                                                                                                        | 0                                                                | Article       | 536                         |
| 2   | Estimates of incidence and mortality of cervical cancer in 2018: a worldwide analysis                                                                                                                                                   | 1                                                                | Article       | 535                         |
| 3   | The experiences of health-care providers during the COVID-19 crisis in China: a qualitative study                                                                                                                                       | 0                                                                | Article       | 315                         |
| 4   | Early estimates of the indirect effects of the COVID-19 pandemic on maternal and child mortality in low-income and middle-income countries: a modelling study                                                                           | 0                                                                | Article       | 275                         |
| 5   | Global, regional, and national estimates of the population at increased risk of severe COVID-19 due to underlying health conditions in 2020: a modelling study                                                                          | 0                                                                | Article       | 255                         |
| 6   | Global burden of cancer attributable to infections in 2018: a worldwide incidence analysis                                                                                                                                              | 1                                                                | Article       | 188                         |
| 7   | Potential association between COVID-19 mortality and healthcare resource availability                                                                                                                                                   | 0                                                                | Letter        | 150                         |
| 8   | Potential impact of the COVID-19 pandemic on HIV, tuberculosis, and malaria in low-income and middle-income countries: a modelling study                                                                                                | 0                                                                | Article       | 179                         |
| 9   | Ethnic and regional variations in hospital mortality from COVID-19 in Brazil: a cross-sectional observational study                                                                                                                     | 0                                                                | Article       | 119                         |
| 10  | COVID-19 in Italy: momentous decisions and many uncertainties                                                                                                                                                                           | 0                                                                | Letter        | 75                          |
| 11  | Affordability of the EAT-Lancet reference diet: a global analysis                                                                                                                                                                       | 1                                                                | Article       | 83                          |
| 12  | Effect of the COVID-19 pandemic response on intrapartum care, stillbirth, and neonatal mortality outcomes in Nepal: a prospective observational study                                                                                   | 0                                                                | Article       | 109                         |
| 13  | SARS-CoV-2 antibody prevalence in Brazil: results from two successive nationwide serological household surveys                                                                                                                          | 0                                                                | Article       | 105                         |
| 14  | Immediate impact of stay-at-home orders to control COVID-19 transmission on socioeconomic conditions, food insecurity, mental health, and intimate partner violence in Bangladeshi women and their families: an interrupted time series | 0                                                                | Article       | 92                          |

| No. | Title                                                                                                                                                        | COVID-19-related publication = 0<br>non-COVID-19 publication = 1 | Document type      | Number of citations in 2021 |
|-----|--------------------------------------------------------------------------------------------------------------------------------------------------------------|------------------------------------------------------------------|--------------------|-----------------------------|
| 15  | Unintended pregnancy and abortion by income, region, and the legal status of abortion: estimates from a comprehensive model for 1990-2019                    | 1                                                                | Article            | 76                          |
| 16  | Routine childhood immunisation during the COVID-19 pandemic in Africa: a benefit-risk analysis of health benefits versus excess risk of SARS-CoV-2 infection | 0                                                                | Article            | 83                          |
| 17  | Use of antiviral drugs to reduce COVID-19 transmission                                                                                                       | 0                                                                | Letter             | 42                          |
| 18  | Global burden and trends in premenopausal and postmenopausal breast cancer: a population-based study                                                         | 1                                                                | Article            | 66                          |
| 19  | Considering inequalities in the school closure response to COVID-19                                                                                          | 0                                                                | Letter             | 52                          |
| 20  | Global burden of respiratory infections associated with seasonal influenza in children under 5 years in 2018: a systematic review and modelling study        | 1                                                                | Review             | 46                          |
| 21  | COVID-19: mitigating transmission via wastewater plumbing systems                                                                                            | 0                                                                | Letter             | 66                          |
| 22  | Global and regional prevalence, burden, and risk factors for carotid atherosclerosis: a systematic review, meta-analysis, and modelling study                | 1                                                                | Review             | 55                          |
| 23  | COVID-19 pandemic in west Africa                                                                                                                             | 0                                                                | Editorial Material | 38                          |
| 24  | Early in the epidemic: impact of preprints on global discourse about COVID-19 transmissibility                                                               | 0                                                                | Editorial Material | 46                          |
| 25  | COVID-19 and risks to the supply and quality of tests, drugs, and vaccines                                                                                   | 0                                                                | Editorial Material | 32                          |
| 26  | A vulnerability index for the management of and response to the COVID-19 epidemic in India: an ecological study                                              | 0                                                                | Article            | 48                          |
| 27  | Limiting the spread of COVID-19 in Africa : one size mitigation strategies do not fit all countries                                                          | 0                                                                | Editorial Material | 35                          |
| 28  | Prevalence of vitamin D deficiency in Africa: a systematic review and meta-analysis                                                                          | 1                                                                | Review             | 33                          |
| 29  | Adverse health effects associated with household air pollution: a systematic review, meta-analysis, and burden estimation study                              | 0                                                                | Review             | 36                          |
| 30  | Impact of COVID-19 lockdown on routine immunisation in Karachi, Pakistan                                                                                     | 0                                                                | Letter             | 37                          |

| No. | Title                                                                                                                                                                                                    | COVID-19-related publication = 0<br>non-COVID-19 publication = 1 | Document type      | Number of citations in 2021 |
|-----|----------------------------------------------------------------------------------------------------------------------------------------------------------------------------------------------------------|------------------------------------------------------------------|--------------------|-----------------------------|
| 31  | Guided self-help to reduce psychological distress in South Sudanese female refugees in Uganda: a cluster randomised trial                                                                                | 1                                                                | Article            | 29                          |
| 32  | Post-discharge prognosis of patients admitted to hospital for heart failure by world region, and national level of income and income disparity (REPORT-HF): a cohort study                               | 1                                                                | Article            | 29                          |
| 33  | Opportunities and challenges for telehealth within, and beyond, a pandemic                                                                                                                               | 0                                                                | Editorial Material | 37                          |
| 34  | Trends in premature avertable mortality from non-communicable diseases for 195 countries and territories, 1990-2017: a population-based study                                                            | 1                                                                | Article            | 23                          |
| 35  | A wake-up call: COVID-19 and its impact on children's health and wellbeing                                                                                                                               | 0                                                                | Editorial Material | 33                          |
| 36  | Estimates of the global population of children who are HIV-exposed and uninfected, 2000-18: a modelling study                                                                                            | 1                                                                | Article            | 31                          |
| 37  | A call for action for COVID-19 surveillance and research during pregnancy                                                                                                                                | 0                                                                | Editorial Material | 17                          |
| 38  | COVID-19 outbreak and decreased hospitalisation of pregnant women in labour                                                                                                                              | 0                                                                | Editorial Material | 34                          |
| 39  | Diarrhoeal disease and subsequent risk of death in infants and children residing in low-income and middle-income countries: analysis of the GEMS case-control study and 12-month GEMS-1A follow-on study | 1                                                                | Article            | 29                          |
| 40  | Real-world effectiveness of rotavirus vaccines, 2006-19: a literature review and meta-analysis                                                                                                           | 1                                                                | Review             | 33                          |
| 41  | Mortality and recurrent vascular events after first incident stroke: a 9-year community-based study of 0 center dot 5 million Chinese adults                                                             | 1                                                                | Article            | 21                          |
| 42  | Characteristics of successful programmes targeting gender inequality and restrictive gender norms for the health and wellbeing of children, adolescents, and young adults: a systematic review           | 1                                                                | Review             | 28                          |
| 43  | A comprehensive assessment of universal health coverage in 111 countries: a retrospective observational study                                                                                            | 1                                                                | Article            | 28                          |
| 44  | Deciphering the power of isolation in controlling COVID-19 outbreaks                                                                                                                                     | 0                                                                | Editorial Material | 16                          |
| 45  | Effect of a differentiated service delivery model on virological failure in adolescents with HIV in Zimbabwe (Zvandiri):                                                                                 | 1                                                                | Article            | 23                          |

| No. | Title                                                                                                                                                                    | COVID-19-related publication = 0<br>non-COVID-19 publication = 1 | Document type      | Number of citations in 2021 |
|-----|--------------------------------------------------------------------------------------------------------------------------------------------------------------------------|------------------------------------------------------------------|--------------------|-----------------------------|
|     | a cluster-randomised controlled trial                                                                                                                                    |                                                                  |                    |                             |
| 46  | Physical multimorbidity, health service use, and catastrophic health expenditure by socioeconomic groups in China: an analysis of population-based panel data            | 1                                                                | Article            | 24                          |
| 47  | Implementation of non-communicable disease policies: a geopolitical analysis of 151 countries                                                                            | 1                                                                | Article            | 20                          |
| 48  | Effective coverage measurement in maternal, newborn, child, and adolescent health and nutrition: progress, future prospects, and implications for quality health systems | 1                                                                | Review             | 28                          |
| 49  | Use of the prevented fraction for the population to determine deaths averted by existing prevalence of physical activity: a descriptive study                            | 1                                                                | Article            | 25                          |
| 50  | Biomedical waste amid COVID-19: perspectives from Bangladesh                                                                                                             | 0                                                                | Letter             | 27                          |
| 51  | Cooking fuels and risk of all-cause and cardiopulmonary mortality in urban China: a prospective cohort study                                                             | 1                                                                | Article            | 21                          |
| 52  | Infection prevention and control compliance in Tanzanian outpatient facilities: a cross-sectional study with implications for the control of COVID-19                    | 1                                                                | Article            | 27                          |
| 53  | Trends in cardiometabolic risk factors in the Americas between 1980 and 2014: a pooled analysis of population-based surveys                                              | 1                                                                | Article            | 22                          |
| 54  | COVID-19 pneumonia and the appropriate use of antibiotics                                                                                                                | 0                                                                | Editorial Material | 26                          |
| 55  | Effect of facility-based HIV self-testing on uptake of testing among outpatients in Malawi: a cluster-randomised trial                                                   | 1                                                                | Article            | 18                          |
| 56  | Safety of oral ivermectin during pregnancy: a systematic review and meta-analysis                                                                                        | 1                                                                | Review             | 14                          |
| 57  | Initial findings from a novel population-based child mortality surveillance approach: a descriptive study                                                                | 1                                                                | Article            | 26                          |
| 58  | Frequency and management of maternal infection in health facilities in 52 countries (GLOSS): a 1-week inception cohort study                                             | 1                                                                | Article            | 19                          |
| 59  | An appeal for practical social justice in the COVID-19 global response in low-income and middle-income countries                                                         | 0                                                                | Editorial Material | 13                          |

| No. | Title                                                                                                                                        | COVID-19-related publication = 0<br>non-COVID-19 publication = 1 | Document type      | Number of citations in 2021 |
|-----|----------------------------------------------------------------------------------------------------------------------------------------------|------------------------------------------------------------------|--------------------|-----------------------------|
| 60  | Breast cancer survival and survival gap apportionment in sub-Saharan Africa (ABC-DO): a prospective cohort study                             | 1                                                                | Article            | 17                          |
| 61  | Focusing on health-care providers' experiences in the COVID-19 crisis                                                                        | 0                                                                | Editorial Material | 18                          |
| 62  | Community-based antiretroviral therapy versus standard clinic-based services for HIV in South Africa and Uganda (DO ART): a randomised trial | 1                                                                | Article            | 16                          |
| 63  | Opium use and subsequent incidence of cancer: results from the Golestan Cohort Study                                                         | 1                                                                | Article            | 13                          |
| 64  | Mental health matters                                                                                                                        | 1                                                                | Editorial Material | 10                          |
| 65  | Leveraging Africa's preparedness towards the next phase of the COVID-19 pandemic                                                             | 0                                                                | Editorial Material | 13                          |
| 66  | COVID-19: the current situation in Afghanistan                                                                                               | 0                                                                | Letter             | 13                          |
| 67  | Food insecurity will be the sting in the tail of COVID-19                                                                                    | 0                                                                | Editorial Material | 15                          |
| 68  | COVID-19 response in the Middle East and north Africa: challenges and paths forward                                                          | 0                                                                | Editorial Material | 14                          |
| 69  | Not a luxury: a call to maintain sexual and reproductive health in humanitarian and fragile settings during the COVID-19 pandemic            | 0                                                                | Editorial Material | 13                          |
| 70  | The global distribution of lymphatic filariasis, 2000-18: a geospatial analysis                                                              | 1                                                                | Article            | 18                          |
| 71  | Projected health-care resource needs for an effective response to COVID-19 in 73 low-income and middle-income countries: a modelling study   | 0                                                                | Article            | 18                          |
| 72  | Mapping geographical inequalities in access to drinking water and sanitation facilities in low-income and middle-income countries, 2000-17   | 1                                                                | Article            | 15                          |
| 73  | Early policy actions and emergency response to the COVID-19 pandemic in Mongolia: experiences and challenges                                 | 0                                                                | Article            | 10                          |
| 74  | Use of the six core surgical indicators from the Lancet Commission on Global Surgery in Colombia: a situational analysis                     | 1                                                                | Article            | 11                          |
| 75  | Avoiding indirect effects of COVID-19 on maternal and child health                                                                           | 0                                                                | Editorial Material | 10                          |

| No. | Title                                                                                                                                                                                                       | COVID-19-related publication = 0<br>non-COVID-19 publication = 1 | Document type      | Number of citations in 2021 |
|-----|-------------------------------------------------------------------------------------------------------------------------------------------------------------------------------------------------------------|------------------------------------------------------------------|--------------------|-----------------------------|
| 76  | Delays in hospital admissions in patients with fractures across 18 low-income and middle-income countries (INORMUS): a prospective observational study                                                      | 1                                                                | Article            | 10                          |
| 77  | The power of peers and community in the continuum of HIV care                                                                                                                                               | 1                                                                | Editorial Material | 13                          |
| 78  | Can Nigeria contain the COVID-19 outbreak using lessons from recent epidemics?                                                                                                                              | 0                                                                | Letter             | 9                           |
| 79  | Gender inequalities in health and wellbeing across the first two decades of life: an analysis of 40 low-income and middle-income countries in the Asia-Pacific region                                       | 1                                                                | Article            | 11                          |
| 80  | Cause-specific mortality of children younger than 5 years in communities receiving biannual mass azithromycin treatment in Niger: verbal autopsy results from a cluster-randomised controlled trial         | 1                                                                | Article            | 12                          |
| 81  | Domestic HPV vaccine price and economic returns for cervical cancer prevention in China: a cost-effectiveness analysis                                                                                      | 1                                                                | Article            | 11                          |
| 82  | COVID-19 preparedness in Malawi: a national facility-based critical care assessment                                                                                                                         | 0                                                                | Letter             | 10                          |
| 83  | Randomised comparison of two household survey modules for measuring stillbirths and neonatal deaths in five countries: the Every Newborn-INDEPTH study                                                      | 1                                                                | Article            | 18                          |
| 84  | Preventive malaria treatment among school-aged children in sub-Saharan Africa: a systematic review and meta-analyses                                                                                        | 1                                                                | Review             | 11                          |
| 85  | Effects of updated demography, disability weights, and cervical cancer burden on estimates of human papillomavirus vaccination impact at the global, regional, and national levels: a PRIME modelling study | 1                                                                | Article            | 16                          |
| 86  | The effect of acute malnutrition on enteric pathogens, moderate-to-severe diarrhoea, and associated mortality in the Global Enteric Multicenter Study cohort: a post-hoc analysis                           | 1                                                                | Article            | 10                          |
| 87  | Clinical evaluation of modifications to a human papillomavirus assay to optimise its utility for cervical cancer screening in low-resource settings: a diagnostic accuracy study                            | 1                                                                | Article            | 11                          |
| 88  | Recognising the substantial burden of neglected pandemics cystic and alveolar echinococcosis                                                                                                                | 1                                                                | Editorial Material | 9                           |

| No. | Title                                                                                                                                                                                                                                                            | COVID-19-related publication = 0<br>non-COVID-19 publication = 1 | Document type      | Number of citations in 2021 |
|-----|------------------------------------------------------------------------------------------------------------------------------------------------------------------------------------------------------------------------------------------------------------------|------------------------------------------------------------------|--------------------|-----------------------------|
| 89  | Gender-transformative programmes: implications for research and action                                                                                                                                                                                           | 1                                                                | Editorial Material | 15                          |
| 90  | Low-cost oral metronomic chemotherapy versus intravenous cisplatin in patients with recurrent, metastatic, inoperable head and neck carcinoma: an open-label, parallel-group, non-inferiority, randomised, phase 3 trial                                         | 1                                                                | Article            | 16                          |
| 91  | Overall, anti-malarial, and non-malarial effect of intermittent preventive treatment during pregnancy with sulfadoxine-pyrimethamine on birthweight: a mediation analysis                                                                                        | 1                                                                | Article            | 12                          |
| 92  | Trends in reported antibiotic use among children under 5 years of age with fever, diarrhoea, or cough with fast or difficult breathing across low-income and middle-income countries in 2005-17: a systematic analysis of 132 national surveys from 73 countries | 1                                                                | Article            | 14                          |
| 93  | Trends in sexual activity and demand for and use of modern contraceptive methods in 74 countries: a retrospective analysis of nationally representative surveys                                                                                                  | 1                                                                | Article            | 7                           |
| 94  | In the COVID-19 pandemic in Brazil, do brown lives matter?                                                                                                                                                                                                       | 0                                                                | Editorial Material | 6                           |
| 95  | The colliding epidemics of COVID-19, Ebola, and measles in the Democratic Republic of the Congo                                                                                                                                                                  | 0                                                                | Editorial Material | 12                          |
| 96  | Softening the blow of the pandemic: will the International Monetary Fund and World Bank make things worse?                                                                                                                                                       | 0                                                                | Editorial Material | 9                           |
| 97  | Prevalence of diabetes in pregnancy among Indigenous women in Australia, Canada, New Zealand, and the USA: a systematic review and meta-analysis                                                                                                                 | 1                                                                | Review             | 7                           |
| 98  | Love in the time of COVID-19: negligence in the Nicaraguan response                                                                                                                                                                                              | 0                                                                | Letter             | 7                           |
| 99  | Effects of high altitude on respiratory rate and oxygen saturation reference values in healthy infants and children younger than 2 years in four countries: a cross-sectional study                                                                              | 1                                                                | Article            | 8                           |
| 100 | Effectiveness and cost-effectiveness of group support psychotherapy delivered by trained lay health workers for depression treatment among people with HIV in Uganda: a cluster-randomised trial                                                                 | 1                                                                | Article            | 9                           |
| 101 | Burden of disease in francophone Africa, 1990-2017: a systematic analysis for the Global Burden of Disease Study 2017                                                                                                                                            | 1                                                                | Article            | 7                           |

| No. | Title                                                                                                                                            | COVID-19-related publication = 0<br>non-COVID-19 publication = 1 | Document type      | Number of citations in 2021 |
|-----|--------------------------------------------------------------------------------------------------------------------------------------------------|------------------------------------------------------------------|--------------------|-----------------------------|
| 102 | Association of childhood smoking and adult mortality: prospective study of 120 000 Cuban adults                                                  | 1                                                                | Article            | 5                           |
| 103 | Rohingya refugees at high risk of COVID-19 in Bangladesh                                                                                         | 0                                                                | Editorial Material | 10                          |
| 104 | Clinical trials of disease stages in COVID 19: complicated and often misinterpreted                                                              | 0                                                                | Editorial Material | 8                           |
| 105 | Early-life respiratory syncytial virus lower respiratory tract infection in a South African birth cohort: epidemiology and effect on lung health | 1                                                                | Article            | 9                           |
| 106 | Chinese trends in adolescent marriage and fertility between 1990 and 2015: a systematic synthesis of national and subnational population data    | 1                                                                | Article            | 8                           |
| 107 | The Lancet Global Health Commission on High Quality Health Systems 1 year on: progress on a global imperative                                    | 1                                                                | Editorial Material | 10                          |
| 108 | Alcohol: global health's blind spot                                                                                                              | 1                                                                | Editorial Material | 7                           |
| 109 | Dexamethasone for COVID-19: data needed from randomised clinical trials in Africa                                                                | 0                                                                | Letter             | 6                           |
| 110 | Impact of COVID-19 on maternal and child health                                                                                                  | 0                                                                | Letter             | 10                          |
| 111 | GeneXpert for the diagnosis of COVID-19 in LMICs                                                                                                 | 0                                                                | Editorial Material | 10                          |
| 112 | Epidemic cystic and alveolar echinococcosis in Kyrgyzstan: an analysis of national surveillance data                                             | 1                                                                | Article            | 6                           |
| 113 | Social innovation in global health: sparking location action                                                                                     | 1                                                                | Editorial Material | 5                           |
| 114 | Resource requirements for essential universal health coverage: a modelling study based on findings from Disease Control Priorities, 3rd edition  | 1                                                                | Article            | 9                           |
| 115 | Prediction of dementia risk in low-income and middle-income countries (the 10/66 Study): an independent external validation of existing models   | 1                                                                | Article            | 5                           |
| 116 | A new vehicle to accelerate the UN Sustainable Development Goals                                                                                 | 1                                                                | Editorial Material | 4                           |
| 117 | Decolonising COVID-19                                                                                                                            | 0                                                                | Editorial Material | 6                           |
| 118 | Analysing the affordability of the EAT-Lancet diet                                                                                               | 1                                                                | Editorial Material | 7                           |



| No. | Title                                                                                                                                                                             | COVID-19-related publication = 0<br>non-COVID-19 publication = 1 | Document type      | Number of citations in 2021 |
|-----|-----------------------------------------------------------------------------------------------------------------------------------------------------------------------------------|------------------------------------------------------------------|--------------------|-----------------------------|
| 119 | Association between ethnicity and under-5 mortality: analysis of data from demographic surveys from 36 low-income and middle-income countries                                     | 1                                                                | Article            | 3                           |
| 120 | Transparency assessment of COVID-19 models                                                                                                                                        | 0                                                                | Letter             | 9                           |
| 121 | All children surviving and thriving: re-envisioning UNICEF's conceptual framework of malnutrition                                                                                 | 1                                                                | Editorial Material | 10                          |
| 122 | Current awareness of palliative care in China                                                                                                                                     | 1                                                                | Letter             | 5                           |
| 123 | Vitamin D status in Africa is worse than in other continents                                                                                                                      | 1                                                                | Editorial Material | 7                           |
| 124 | Interim effect evaluation of the hepatitis C elimination programme in Georgia: a modelling study                                                                                  | 1                                                                | Article            | 6                           |
| 125 | HIV, tuberculosis, and malaria: how can the impact of COVID-19 be minimised?                                                                                                      | 0                                                                | Editorial Material | 9                           |
| 126 | Association between interpregnancy interval and subsequent stillbirth in 58 low-income and middle-income countries: a retrospective analysis using Demographic and Health Surveys | 1                                                                | Article            | 8                           |
| 127 | Travel time to health-care facilities, mode of transportation, and HIV elimination in Malawi: a geospatial modelling analysis                                                     | 1                                                                | Article            | 6                           |
| 128 | Burden of non-communicable diseases from infectious causes in 2017: a modelling study                                                                                             | 1                                                                | Article            | 7                           |
| 129 | Work a key determinant in COVID-19 risk                                                                                                                                           | 0                                                                | Letter             | 8                           |
| 130 | Births and deaths must be registered in Africa                                                                                                                                    | 1                                                                | Letter             | 8                           |
| 131 | The global nursing workforce: realising universal palliative care                                                                                                                 | 1                                                                | Editorial Material | 3                           |
| 132 | Uncrewed aircraft systems versus motorcycles to deliver laboratory samples in west Africa: a comparative economic study                                                           | 1                                                                | Article            | 5                           |
| 133 | Pulse oximetry in low-resource settings during the COVID-19 pandemic                                                                                                              | 0                                                                | Letter             | 8                           |
| 134 | Contextualising geographical vulnerability to COVID-19 in India                                                                                                                   | 0                                                                | Editorial Material | 6                           |
| 135 | Improving handwashing habits and household air quality in Africa after COVID-19                                                                                                   | 0                                                                | Editorial Material | 8                           |

| No. | Title                                                                                                                                                                   | COVID-19-related publication = 0<br>non-COVID-19 publication = 1 | Document type      | Number of citations in 2021 |
|-----|-------------------------------------------------------------------------------------------------------------------------------------------------------------------------|------------------------------------------------------------------|--------------------|-----------------------------|
| 136 | COVID-19: time to plan for prompt universal access to diagnostics and treatments                                                                                        | 0                                                                | Editorial Material | 4                           |
| 137 | Negative pressure wound therapy versus standard treatment in patients with acute conflict-related extremity wounds: a pragmatic, multisite, randomised controlled trial | 1                                                                | Article            | 4                           |
| 138 | Air pollution and stunting: a missing link?                                                                                                                             | 1                                                                | Editorial Material | 5                           |
| 139 | Impact of the visceral leishmaniasis elimination initiative on <i>Leishmania donovani</i> transmission in Nepal: a 10-year repeat survey                                | 1                                                                | Article            | 7                           |
| 140 | Associations between national development indicators and the age profile of people who inject drugs: results from a global systematic review and meta-analysis          | 1                                                                | Review             | 7                           |
| 141 | Time to spatialise epidemiology in China                                                                                                                                | 0                                                                | Editorial Material | 7                           |
| 142 | Certifying the interruption of wild poliovirus transmission in the WHO African region on the turbulent journey to a polio free world                                    | 1                                                                | Article            | 6                           |
| 143 | Publishing in the time of COVID-19                                                                                                                                      | 0                                                                | Editorial Material | 5                           |
| 144 | Answering the right questions for policymakers on COVID-19                                                                                                              | 0                                                                | Letter             | 5                           |
| 145 | The allocation of US\$105 billion in global funding from G20 countries for infectious disease research between 2000 and 2017: a content analysis of investments         | 1                                                                | Article            | 8                           |
| 146 | Temporal trends in socioeconomic inequalities in HIV testing: an analysis of cross-sectional surveys from 16 sub-Saharan African countries Pearl                        | 1                                                                | Article            | 1                           |
| 147 | Point-of-care HPV molecular diagnostics for a test-and-treat model in high-risk HIV populations                                                                         | 1                                                                | Editorial Material | 6                           |
| 148 | Health system quality in the time of COVID-19                                                                                                                           | 0                                                                | Editorial Material | 5                           |
| 149 | Providing maternal health services during the COVID-19 pandemic in Nepal                                                                                                | 0                                                                | Editorial Material | 9                           |
| 150 | COVID-19 in the Caribbean small island developing states: lessons learnt from extreme weather events                                                                    | 0                                                                | Editorial Material | 5                           |

| No. | Title                                                                                                                                                                                     | COVID-19-related publication = 0<br>non-COVID-19 publication = 1 | Document type      | Number of citations in 2021 |
|-----|-------------------------------------------------------------------------------------------------------------------------------------------------------------------------------------------|------------------------------------------------------------------|--------------------|-----------------------------|
| 151 | Battling COVID-19 in the occupied Palestinian territory                                                                                                                                   | 0                                                                | Letter             | 6                           |
| 152 | The health and economic burden of smoking in 12 Latin American countries and the potential effect of increasing tobacco taxes: an economic modelling study                                | 1                                                                | Article            | 3                           |
| 153 | The necessity for intra-action reviews during the COVID-19 pandemic                                                                                                                       | 0                                                                | Editorial Material | 6                           |
| 154 | Effects and cost of different strategies to eliminate hepatitis C virus transmission in Pakistan: a modelling analysis                                                                    | 1                                                                | Article            | 4                           |
| 155 | Use of the Demographic and Health Survey framework as a population surveillance strategy for COVID-19                                                                                     | 0                                                                | Letter             | 2                           |
| 156 | Use of controlled temperature chain and compact prefilled auto-disable devices to reach 2030 hepatitis B birth dose vaccination targets in LMICs: a modelling and cost-optimisation study | 1                                                                | Article            | 4                           |
| 157 | COVID-19: rethinking risk                                                                                                                                                                 | 0                                                                | Editorial Material | 1                           |
| 158 | Mapping geographical inequalities in oral rehydration therapy coverage in low-income and middle-income countries, 2000-17                                                                 | 1                                                                | Article            | 4                           |
| 159 | Estimating access to health care in Yemen, a complex humanitarian emergency setting: a descriptive applied geospatial analysis                                                            | 1                                                                | Article            | 4                           |
| 160 | Oxygen availability in sub-Saharan African countries: a call for data to inform service delivery                                                                                          | 1                                                                | Letter             | 4                           |
| 161 | Socioeconomic differences in health-care use and outcomes for stroke and ischaemic heart disease in China during 2009-16: a prospective cohort study of 0 center dot 5 million adults     | 1                                                                | Article            | 4                           |
| 162 | Impact of COVID-19 on maternal and child health                                                                                                                                           | 0                                                                | Letter             | 10                          |
| 163 | Cytisine for smoking cessation in patients with tuberculosis: a multicentre, randomised, double-blind, placebo-controlled phase 3 trial                                                   | 1                                                                | Article            | 6                           |
| 164 | Diagnosing malaria and other febrile illnesses during the COVID-19 pandemic                                                                                                               | 0                                                                | Editorial Material | 0                           |
| 165 | Challenges in ensuring robust research and reporting of health outcomes in sub-Saharan African prisons                                                                                    | 1                                                                | Editorial Material | 5                           |

| No. | Title                                                                                                                                                                                                            | COVID-19-related publication = 0<br>non-COVID-19 publication = 1 | Document type      | Number of citations in 2021 |
|-----|------------------------------------------------------------------------------------------------------------------------------------------------------------------------------------------------------------------|------------------------------------------------------------------|--------------------|-----------------------------|
| 166 | The burden of allergic diseases in the Indian subcontinent: barriers and challenges                                                                                                                              | 1                                                                | Editorial Material | 4                           |
| 167 | The epidemiology of rubella, 2007-18: an ecological analysis of surveillance data                                                                                                                                | 1                                                                | Article            | 4                           |
| 168 | Unintended pregnancy and abortion: what does it tell us about reproductive health and autonomy?                                                                                                                  | 1                                                                | Editorial Material | 3                           |
| 169 | Effectiveness of post-partum family planning interventions on contraceptive use and method mix at 1 year after childbirth in Kinshasa, DR Congo (Yam Daabo): a single-blind, cluster-randomised controlled trial | 1                                                                | Article            | 3                           |
| 170 | EU guidance impedes humanitarian action to prevent COVID-19 in Syria                                                                                                                                             | 0                                                                | Editorial Material | 3                           |
| 171 | Risk-benefit analysis of tuberculosis infection testing for household contact management in high-burden countries: a mathematical modelling study                                                                | 1                                                                | Article            | 4                           |
| 172 | COVID-19 care in India: the course to self-reliance                                                                                                                                                              | 0                                                                | Editorial Material | 5                           |
| 173 | On the fallibility of simulation models in informing pandemic responses                                                                                                                                          | 0                                                                | Letter             | 4                           |
| 174 | Global disparities in breast cancer outcomes: new perspectives, widening inequities, unanswered questions                                                                                                        | 1                                                                | Editorial Material | 3                           |
| 175 | Excess mortality associated with mental illness in people living with HIV in Cape Town, South Africa: a cohort study using linked electronic health records                                                      | 1                                                                | Article            | 3                           |
| 176 | Is ivermectin safe in pregnancy?                                                                                                                                                                                 | 1                                                                | Editorial Material | 3                           |
| 177 | Estimates of aid for reproductive, maternal, newborn, and child health: findings from application of the Muskoka2 method, 2002-17                                                                                | 1                                                                | Article            | 3                           |
| 178 | Effect of a mobile phone intervention for female sex workers on unintended pregnancy in Kenya (WHISPER or SHOUT): a cluster-randomised controlled trial                                                          | 1                                                                | Article            | 2                           |
| 179 | Developing health policies in patients presenting with SARS-CoV-2: consider tuberculosis                                                                                                                         | 0                                                                | Editorial Material | 6                           |
| 180 | Impact of COVID-19 on maternal and child health                                                                                                                                                                  | 0                                                                | Letter             | 10                          |
| 181 | Cardiovascular risk of carotid atherosclerosis: global consensus beyond societal guidelines                                                                                                                      | 1                                                                | Editorial Material | 4                           |

| No. | Title                                                                                                                                                                                                                         | COVID-19-related publication = 0<br>non-COVID-19 publication = 1 | Document type      | Number of citations in 2021 |
|-----|-------------------------------------------------------------------------------------------------------------------------------------------------------------------------------------------------------------------------------|------------------------------------------------------------------|--------------------|-----------------------------|
| 182 | The burden of viral respiratory infections in young children in low-resource settings                                                                                                                                         | 1                                                                | Editorial Material | 4                           |
| 183 | Selective laser trabeculoplasty versus 0.5% timolol eye drops for the treatment of glaucoma in Tanzania: a randomised controlled trial                                                                                        | 1                                                                | Article            | 0                           |
| 184 | Diverging trends in obesity, diabetes, and raised blood pressure in the Americas                                                                                                                                              | 1                                                                | Editorial Material | 4                           |
| 185 | Effect of a quality improvement package for intrapartum and immediate newborn care on fresh stillbirth and neonatal mortality among preterm and low-birthweight babies in Kenya and a cluster-randomised facility-based trial | 1                                                                | Article            | 5                           |
| 186 | Human rights protections are needed alongside PPE for health-care workers responding to COVID-19                                                                                                                              | 0                                                                | Letter             | 3                           |
| 187 | COVID-19 vaccination: returning to WHO's Health For All                                                                                                                                                                       | 0                                                                | Editorial Material | 4                           |
| 188 | Trends and social determinants of adolescent marriage and fertility in China                                                                                                                                                  | 1                                                                | Editorial Material | 3                           |
| 189 | Heterogeneity in enterotoxigenic Escherichia coli and shigella infections in children under 5 years of age from 11 African countries: a subnational approach quantifying risk, mortality, morbidity, and stunting             | 1                                                                | Article            | 2                           |
| 190 | Effects of vehicle safety design on road traffic deaths, injuries, and public health burden in the Latin American region: a modelling study                                                                                   | 1                                                                | Article            | 1                           |
| 191 | Net benefit and cost-effectiveness of universal iron-containing multiple micronutrient powders for young children in 78 countries: a microsimulation study                                                                    | 1                                                                | Article            | 4                           |
| 192 | Indigenous cultures in countries with similar colonisation histories share the challenge of intergenerational diabetes                                                                                                        | 1                                                                | Editorial Material | 2                           |
| 193 | Global burden of cancer attributable to infections: the critical role of implementation science                                                                                                                               | 1                                                                | Editorial Material | 3                           |
| 194 | Why is polio still here? A perspective from Pakistan                                                                                                                                                                          | 1                                                                | Letter             | 2                           |
| 195 | Liberal trade policy and food insecurity across the income distribution: an observational analysis in 132 countries, 2014-17                                                                                                  | 1                                                                | Article            | 2                           |
| 196 | Addressing racial inequalities in a pandemic: data limitations and a call for critical analyses                                                                                                                               | 0                                                                | Letter             | 4                           |

| No. | Title                                                                                                                                                                                                                                                          | COVID-19-related publication = 0<br>non-COVID-19 publication = 1 | Document type      | Number of citations in 2021 |
|-----|----------------------------------------------------------------------------------------------------------------------------------------------------------------------------------------------------------------------------------------------------------------|------------------------------------------------------------------|--------------------|-----------------------------|
| 197 | COVID-19: an opportunity to improve infection prevention and control in LMICs                                                                                                                                                                                  | 0                                                                | Letter             | 3                           |
| 198 | Improving birth and death data for African decision making                                                                                                                                                                                                     | 1                                                                | Letter             | 2                           |
| 199 | Prevalence of risk factors for non-communicable diseases in a rural population of Bangladesh: a cross-sectional study                                                                                                                                          | 1                                                                | Meeting Abstract   | 2                           |
| 200 | Measuring mortality from non-communicable diseases: broadening the band                                                                                                                                                                                        | 1                                                                | Editorial Material | 3                           |
| 201 | Decolonising COVID-19: delaying external debt repayments                                                                                                                                                                                                       | 0                                                                | Letter             | 2                           |
| 202 | Evaluating the impact of Georgia's hepatitis C elimination plan: lessons learned for the global initiative                                                                                                                                                     | 1                                                                | Editorial Material | 4                           |
| 203 | Patterns of individual non-treatment during multiple rounds of mass drug administration for control of soil-transmitted helminths in the TUMIKIA trial, Kenya: a secondary longitudinal analysis                                                               | 1                                                                | Article            | 4                           |
| 204 | The where, when, and how of community-based versus clinic-based ART delivery in South Africa and Uganda                                                                                                                                                        | 1                                                                | Editorial Material | 4                           |
| 205 | Progress towards global elimination of lymphatic filariasis                                                                                                                                                                                                    | 1                                                                | Editorial Material | 2                           |
| 206 | World RePORT: a database for mapping biomedical research funding                                                                                                                                                                                               | 1                                                                | Editorial Material | 3                           |
| 207 | Moving towards clean cooking in China                                                                                                                                                                                                                          | 1                                                                | Editorial Material | 2                           |
| 208 | Medical expenditures: not the only source of financial hardship                                                                                                                                                                                                | 1                                                                | Letter             | 2                           |
| 209 | Advancing research ethics systems in Latin America and the Caribbean: a path for other LMICs?                                                                                                                                                                  | 1                                                                | Editorial Material | 1                           |
| 210 | Sanctions on Syria                                                                                                                                                                                                                                             | 1                                                                | Letter             | 2                           |
| 211 | Physical activity: moving from words to action                                                                                                                                                                                                                 | 1                                                                | Editorial Material | 1                           |
| 212 | Performance of late pregnancy biometry for gestational age dating in low-income and middle-income countries: a prospective, multicountry, population-based cohort study from the WHO Alliance for Maternal and Newborn Health Improvement (AMANHI) Study Group | 1                                                                | Article            | 1                           |
| 213 | Safety of ivermectin during pregnancy                                                                                                                                                                                                                          | 1                                                                | Letter             | 3                           |
| 214 | Measurement matters: who and what counts on the road to universal health coverage                                                                                                                                                                              | 1                                                                | Editorial Material | 1                           |

| No. | Title                                                                                                                                                                                                                             | COVID-19-related publication = 0<br>non-COVID-19 publication = 1 | Document type      | Number of citations in 2021 |
|-----|-----------------------------------------------------------------------------------------------------------------------------------------------------------------------------------------------------------------------------------|------------------------------------------------------------------|--------------------|-----------------------------|
| 215 | Evidence for the path to cervical cancer elimination                                                                                                                                                                              | 1                                                                | Editorial Material | 0                           |
| 216 | Evidence for visceral leishmaniasis elimination in Nepal                                                                                                                                                                          | 1                                                                | Editorial Material | 2                           |
| 217 | Effect on mortality of increasing the cutoff blood glucose concentration for initiating hypoglycaemia treatment in severely sick children aged 1 month to 5 years in Malawi (SugarFACT): a pragmatic, randomised controlled trial | 1                                                                | Article            | 3                           |
| 218 | Dialysis in Africa: the need for evidence-informed decision making                                                                                                                                                                | 1                                                                | Editorial Material | 2                           |
| 219 | Medical expenditures: not the only source of financial hardship reply                                                                                                                                                             | 1                                                                | Letter             | 1                           |
| 220 | Burden of disease in francophone Africa 1990-2017: the triple penalty?                                                                                                                                                            | 1                                                                | Editorial Material | 1                           |
| 221 | The cost of eliminating hepatitis C in Pakistan                                                                                                                                                                                   | 1                                                                | Editorial Material | 1                           |
| 222 | Nicaragua's response to COVID-19 Reply                                                                                                                                                                                            | 0                                                                | Letter             | 0                           |
| 223 | Quality of care and maternal mortality in a tertiary-level hospital in Mozambique: a retrospective study of clinicopathological discrepancies                                                                                     | 1                                                                | Article            | 1                           |
| 224 | The first Global Pneumonia Forum: recommendations in the time of coronavirus                                                                                                                                                      | 0                                                                | Editorial Material | 2                           |
| 225 | Inequalities in uptake of HIV testing despite scale-up                                                                                                                                                                            | 1                                                                | Editorial Material | 1                           |
| 226 | Delays to diagnosis and barriers to care for breast cancer in Mexico and Peru: a cross sectional study                                                                                                                            | 1                                                                | Meeting Abstract   | 2                           |
| 227 | Guided self-help to reduce psychological distress: what's the potential for scaling up?                                                                                                                                           | 1                                                                | Editorial Material | 2                           |
| 228 | Cost-effectiveness of post-treatment follow-up examinations and secondary prevention of tuberculosis in a high-incidence setting: a model-based analysis                                                                          | 1                                                                | Article            | 1                           |
| 229 | Ultrasound estimation of gestational age in late pregnancy in low-income countries: made to measure or off-the-peg?                                                                                                               | 1                                                                | Editorial Material | 2                           |
| 230 | Leadership training to accelerate progress in public health in sub-Saharan Africa: time for action                                                                                                                                | 1                                                                | Editorial Material | 2                           |
| 231 | Saving lives through vehicle safety                                                                                                                                                                                               | 1                                                                | Editorial Material | 0                           |
| 232 | Feasibility, acceptability, and design of a mobile health application for high-risk men who have sex with men in Hanoi,                                                                                                           | 1                                                                | Meeting Abstract   | 1                           |

| No. | Title                                                                                                                                                                              | COVID-19-related publication = 0<br>non-COVID-19 publication = 1 | Document type      | Number of citations in 2021 |
|-----|------------------------------------------------------------------------------------------------------------------------------------------------------------------------------------|------------------------------------------------------------------|--------------------|-----------------------------|
|     | Vietnam                                                                                                                                                                            |                                                                  |                    |                             |
| 233 | Learning from progress: global NCD policy implementation at national level                                                                                                         | 1                                                                | Editorial Material | 1                           |
| 234 | Democracy and implementation of non-communicable disease policies                                                                                                                  | 1                                                                | Letter             | 2                           |
| 235 | Spatiotemporal dynamics of vector-borne disease risk across human land-use gradients: examining the role of agriculture, indigenous territories, and protected areas in Costa Rica | 1                                                                | Meeting Abstract   | 1                           |
| 236 | Heart failure in low-income and middle-income countries: failing REPORT card grades                                                                                                | 1                                                                | Editorial Material | 2                           |
| 237 | Public health and Big Alcohol                                                                                                                                                      | 1                                                                | Letter             | 0                           |
| 238 | Physical activity promotion: can a focus on disease limit successful messaging?                                                                                                    | 1                                                                | Letter             | 0                           |
| 239 | Implementing change for facility-based peripartum care in low-income and middle-income countries                                                                                   | 1                                                                | Editorial Material | 2                           |
| 240 | Scaling up tuberculosis preventive therapy for contacts in high transmission settings                                                                                              | 1                                                                | Editorial Material | 2                           |
| 241 | Diversity and solidarity in global health                                                                                                                                          | 1                                                                | Editorial Material | 2                           |
| 242 | Health system reform in China: the challenges of multimorbidity                                                                                                                    | 1                                                                | Editorial Material | 2                           |
| 243 | Use of negative pressure wound therapy on conflict-related wounds                                                                                                                  | 1                                                                | Editorial Material | 2                           |
| 244 | Water and sanitation in a post-COVID world                                                                                                                                         | 0                                                                | Editorial Material | 2                           |
| 245 | Essential universal health coverage needs local capacity development                                                                                                               | 1                                                                | Editorial Material | 2                           |
| 246 | An innovation bootcamp model to develop HIV self-testing social enterprise among young people in Nigeria: a youth participatory design approach                                    | 1                                                                | Meeting Abstract   | 1                           |
| 247 | Achieving coordinated national immunity and cholera elimination in Haiti through vaccination: a modelling study                                                                    | 1                                                                | Article            | 0                           |
| 248 | A need to re-focus efforts to improve long-term prognosis after stroke in China                                                                                                    | 1                                                                | Editorial Material | 2                           |
| 249 | Measuring antibiotic use in children: piecing together the puzzle                                                                                                                  | 1                                                                | Editorial Material | 2                           |



| No. | Title                                                                                                                                                                                               | COVID-19-related publication = 0<br>non-COVID-19 publication = 1 | Document type      | Number of citations in 2021 |
|-----|-----------------------------------------------------------------------------------------------------------------------------------------------------------------------------------------------------|------------------------------------------------------------------|--------------------|-----------------------------|
| 250 | Cost-effectiveness of intermittent preventive treatment with dihydroartemisinin-piperaquine for malaria during pregnancy: an analysis using efficacy results from Uganda and Kenya, and pooled data | 1                                                                | Article            | 0                           |
| 251 | Launching the Kofi Annan Global Health Leadership Programme                                                                                                                                         | 1                                                                | Editorial Material | 1                           |
| 252 | Recognising the burden of maternal infection worldwide                                                                                                                                              | 1                                                                | Editorial Material | 1                           |
| 253 | Taking the neglected out of neglected tropical diseases                                                                                                                                             | 1                                                                | Editorial Material | 1                           |
| 254 | RSV lower respiratory tract infection and lung health in the first 2 years of life                                                                                                                  | 1                                                                | Editorial Material | 0                           |
| 255 | Nicaragua's response to COVID-19                                                                                                                                                                    | 0                                                                | Letter             | 0                           |
| 256 | Development of an interprofessional curriculum to improve team-based HIV care in sub-Saharan Africa: a training programme for undergraduate and early career health professionals                   | 1                                                                | Meeting Abstract   | 1                           |
| 257 | Challenging the assumption that interpregnancy interval causes stillbirth in low-income and middle-income countries                                                                                 | 1                                                                | Editorial Material | 1                           |
| 258 | Survival time and its predictors in preterm infants in the post-discharge neonatal period: a prospective cohort study in Busoga Region, Uganda                                                      | 1                                                                | Meeting Abstract   | 0                           |
| 259 | Sanctions on Syria                                                                                                                                                                                  | 1                                                                | Letter             | 2                           |
| 260 | On the fallibility of simulation models in informing pandemic responses                                                                                                                             | 0                                                                | Letter             | 4                           |
| 261 | El Nino/Southern Oscillation (ENSO) and stunting in children under 5 years in Peru: a double-difference analysis                                                                                    | 1                                                                | Meeting Abstract   | 0                           |
| 262 | Cholera remains a public health threat in Haiti                                                                                                                                                     | 1                                                                | Editorial Material | 0                           |
| 263 | The time is now: reforming Nigeria's outdated mental health laws                                                                                                                                    | 1                                                                | Editorial Material | 1                           |
| 264 | Optimising TRIUMPH with 6.25 mg chlorthalidone                                                                                                                                                      | 1                                                                | Letter             | 0                           |
| 265 | A call for a systems science approach to understanding drug use in urban environments                                                                                                               | 1                                                                | Editorial Material | 1                           |
| 266 | Enhancing routine surveillance to improve stillbirth data                                                                                                                                           | 1                                                                | Editorial Material | 0                           |
| 267 | Prevalence and determinants of hypertension unawareness in Egyptian adults: a cross-sectional study of data from the                                                                                | 1                                                                | Meeting Abstract   | 1                           |

| No. | Title                                                                                                                                                                                                                | COVID-19-related publication = 0<br>non-COVID-19 publication = 1 | Document type      | Number of citations in 2021 |
|-----|----------------------------------------------------------------------------------------------------------------------------------------------------------------------------------------------------------------------|------------------------------------------------------------------|--------------------|-----------------------------|
|     | 2015 Egyptian Health Issues Study                                                                                                                                                                                    |                                                                  |                    |                             |
| 268 | Preparing for the dengue explosion in Kathmandu, Nepal                                                                                                                                                               | 1                                                                | Editorial Material | 0                           |
| 269 | 2020-30: the decade of anti-corruption?                                                                                                                                                                              | 1                                                                | Editorial Material | 0                           |
| 270 | Endovascular management of acute ischaemic stroke in Nepal                                                                                                                                                           | 1                                                                | Editorial Material | 0                           |
| 271 | Estimating vulnerability to COVID-19 in India                                                                                                                                                                        | 0                                                                | Letter             | 1                           |
| 272 | Effectiveness and cost-effectiveness of group support psychotherapy delivered by trained lay health workers for depression treatment among people with HIV in Uganda: a cluster-randomised trial (vol 8, e387, 2020) | 1                                                                | Correction         | 1                           |
| 273 | Causes of long wait time in health consultation services and strategies to reduce them: an observational study in rural Haiti                                                                                        | 1                                                                | Meeting Abstract   | 0                           |
| 274 | Development of a discrete choice experiment to understand patient preferences for diabetes and hypertension management in rural Uganda                                                                               | 1                                                                | Meeting Abstract   | 1                           |
| 275 | Cost-effectiveness of postpartum haemorrhage first response bundle and non-surgical interventions for refractory postpartum haemorrhage in India: an ex-ante modelling study                                         | 1                                                                | Meeting Abstract   | 1                           |
| 276 | Defining the combined benefit of intermittent preventive malaria treatment in pregnancy                                                                                                                              | 1                                                                | Editorial Material | 1                           |
| 277 | Democracy and implementation of non-communicable disease policies                                                                                                                                                    | 1                                                                | Letter             | 2                           |
| 278 | An assessment of perceptions of justice in Rohingya refugees to identify mental health and psychosocial services needs and inform programme development in Bangladesh: a qualitative survey                          | 1                                                                | Meeting Abstract   | 1                           |
| 279 | Self-care practices and needs in patients with hypertension, diabetes, or both in rural Uganda: a mixed-methods study                                                                                                | 1                                                                | Meeting Abstract   | 1                           |
| 280 | Brucellosis in patients with pyrexia of unknown origin in Assam, India: a retrospective record review                                                                                                                | 1                                                                | Meeting Abstract   | 1                           |
| 281 | Maximising the potential of HPV vaccines                                                                                                                                                                             | 1                                                                | Editorial Material | 1                           |
| 282 | An affordable videolaryngoscope for use during the COVID-19 pandemic                                                                                                                                                 | 0                                                                | Letter             | 1                           |

| No. | Title                                                                                                                                                                                                                                                          | COVID-19-related publication = 0<br>non-COVID-19 publication = 1 | Document type      | Number of citations in 2021 |
|-----|----------------------------------------------------------------------------------------------------------------------------------------------------------------------------------------------------------------------------------------------------------------|------------------------------------------------------------------|--------------------|-----------------------------|
| 283 | Vaccination of contacts of Ebola virus disease survivors to prevent further transmission                                                                                                                                                                       | 1                                                                | Editorial Material | 1                           |
| 284 | Association between alcohol use and violence-related injury in emergency department patients in Moshi, Tanzania: analysis of a prospective trauma registry                                                                                                     | 1                                                                | Meeting Abstract   | 1                           |
| 285 | Interfacility transfer: an indicator of delay in fracture care                                                                                                                                                                                                 | 1                                                                | Editorial Material | 1                           |
| 286 | Uptake of tuberculosis prevention therapy in people living with HIV/AIDS in northern Nigeria: a programme to increase use of isoniazid preventive therapy                                                                                                      | 1                                                                | Meeting Abstract   | 1                           |
| 287 | The elimination of measles in Iran                                                                                                                                                                                                                             | 1                                                                | Editorial Material | 0                           |
| 288 | Household smoke-exposure risk from cooking fuels and cooking locations in Tanzania: a cross-sectional analysis of nationally representative survey data                                                                                                        | 1                                                                | Meeting Abstract   | 1                           |
| 289 | Cost-effectiveness of intermittent preventive treatment with dihydroartemisinin-piperaquine versus single screening and treatment for the control of malaria in pregnancy in Papua, Indonesia: a provider perspective analysis from a cluster-randomised trial | 1                                                                | Article            | 0                           |
| 290 | Strategies to increase timely uptake of hepatitis B vaccine birth dose                                                                                                                                                                                         | 1                                                                | Editorial Material | 0                           |
| 291 | Major gaps in child survival by ethnic group                                                                                                                                                                                                                   | 1                                                                | Editorial Material | 1                           |
| 292 | Self-help or silenced voices? An ethnographically informed warning                                                                                                                                                                                             | 1                                                                | Letter             | 1                           |
| 293 | Readiness of primary health-care facilities for the management of non-communicable diseases in rural Bangladesh: a mixed methods study                                                                                                                         | 1                                                                | Meeting Abstract   | 1                           |
| 294 | MITS: an interim step towards improved cause of death data                                                                                                                                                                                                     | 1                                                                | Editorial Material | 1                           |
| 295 | Estimating vulnerability to COVID-19 in India                                                                                                                                                                                                                  | 0                                                                | Letter             | 1                           |
| 296 | The economics of medical drones                                                                                                                                                                                                                                | 1                                                                | Editorial Material | 0                           |
| 297 | Global health and data-driven policies for emergency responses to infectious disease outbreaks                                                                                                                                                                 | 0                                                                | Editorial Material | 1                           |

| No. | Title                                                                                                                                                                                                               | COVID-19-related publication = 0<br>non-COVID-19 publication = 1 | Document type      | Number of citations in 2021 |
|-----|---------------------------------------------------------------------------------------------------------------------------------------------------------------------------------------------------------------------|------------------------------------------------------------------|--------------------|-----------------------------|
| 298 | The SickleGenAfrica Network                                                                                                                                                                                         | 1                                                                | Editorial Material | 0                           |
| 299 | Increasing the use of effective postpartum contraception: urgent and possible                                                                                                                                       | 1                                                                | Editorial Material | 0                           |
| 300 | Violations of independence: ethnicity and COVID-19 in Brazil                                                                                                                                                        | 0                                                                | Letter             | 0                           |
| 301 | COVID-19 and maternal and perinatal outcomes                                                                                                                                                                        | 0                                                                | Letter             | 0                           |
| 302 | Knowledge use in the development of sugar-sweetened beverage tax policy in Mexico and Chile: a qualitative analysis                                                                                                 | 1                                                                | Meeting Abstract   | 0                           |
| 303 | Estimating vulnerability to COVID-19 in India                                                                                                                                                                       | 0                                                                | Letter             | 1                           |
| 304 | Azithromycin for child survival: digging without getting too dirty into the differential effect on cause-specific mortality                                                                                         | 1                                                                | Editorial Material | 0                           |
| 305 | NCD Risk Factor Collaboration (NCD-RisC)-Americas Working Group. Trends in cardiometabolic risk factors in the Americas between 1980 and 2014: a pooled analysis of population-based surveys (vol 8, pg e123, 2020) | 1                                                                | Correction         | 0                           |
| 306 | Challenges in dementia risk prediction in low-income and middle-income countries                                                                                                                                    | 1                                                                | Editorial Material | 0                           |
| 307 | The health and economic burden of smoking in 12 Latin American countries and the potential effect of increasing tobacco taxes: an economic modelling study (vol 8, pg e1282, 2020)                                  | 1                                                                | Correction         | 0                           |
| 308 | New (or not so new?) lessons from maternal autopsy in Mozambique                                                                                                                                                    | 1                                                                | Editorial Material | 0                           |
| 309 | Trauma Systems Therapy for Refugees (TST-R) in a multi-ethnic refugee population in Maine, USA: early findings from a programme evaluation project with children and adolescents                                    | 1                                                                | Meeting Abstract   | 0                           |
| 310 | Gender-related factors that influence uptake of HIV Services in women who inject drugs: a community based qualitative study in St Petersburg, Russia                                                                | 1                                                                | Meeting Abstract   | 0                           |
| 311 | Extending strong research to high-altitude infants                                                                                                                                                                  | 1                                                                | Editorial Material | 0                           |
| 312 | Task-shifted psychotherapy for depression in people living with HIV                                                                                                                                                 | 1                                                                | Editorial Material | 0                           |
| 313 | What counts as development assistance for reproductive, maternal, newborn, and child health?                                                                                                                        | 1                                                                | Editorial Material | 0                           |
| 314 | Perspectives on transitions away from donor assistance for health: a discrete choices experiment in Sri Lanka                                                                                                       | 1                                                                | Meeting Abstract   | 0                           |

| No. | Title                                                                                                                                                                                                                                    | COVID-19-related publication = 0<br>non-COVID-19 publication = 1 | Document type      | Number of citations in 2021 |
|-----|------------------------------------------------------------------------------------------------------------------------------------------------------------------------------------------------------------------------------------------|------------------------------------------------------------------|--------------------|-----------------------------|
| 315 | Associations between national development indicators and the age profile of people who inject drugs: results from a global systematic review and meta-analysis (vol 8, pg e76, 2020)                                                     | 1                                                                | Correction         | 0                           |
| 316 | Safety and effectiveness of intravenous iron sucrose versus standard oral iron therapy in pregnant women with moderate-to-severe anaemia in India: a multicentre, open-label, phase 3, randomised, controlled trial (vol 7, e1706, 2019) | 1                                                                | Correction         | 0                           |
| 317 | The role of academia in an era of political turmoil                                                                                                                                                                                      | 1                                                                | Editorial Material | 0                           |
| 318 | Evidence for the path to cervical cancer elimination (vol 141, pg 1253, 2019)                                                                                                                                                            | 1                                                                | Correction         | 0                           |
| 319 | Long-term effects of public health insurance on the health of children in Mexico: a retrospective study (vol 7, pg e1448, 2019)                                                                                                          | 1                                                                | Correction         | 0                           |
| 320 | Optimising TRIUMPH with 6.25 mg chlorthalidone reply                                                                                                                                                                                     | 1                                                                | Letter             | 0                           |
| 321 | Point-of-care HPV molecular diagnostics for a test-and-treat model in high-risk HIV populations (vol 8, pg 171, 2020)                                                                                                                    | 1                                                                | Correction         | 0                           |
| 322 | Effect of Medicaid expansion status on risk of late or no prenatal care in black and white US mothers: analysis of US natality data, 2010-17                                                                                             | 1                                                                | Meeting Abstract   | 0                           |
| 323 | Cost analysis and barriers to implementing and sustaining an international surgical resident rotation: a retrospective review                                                                                                            | 1                                                                | Meeting Abstract   | 0                           |
| 324 | Correction to: Exposure to improved nutrition from conception to age 2 years and adult cardiometabolic disease risk: misclassification of 31 individuals                                                                                 | 1                                                                | Letter             | 0                           |
| 325 | Cholera in Haiti Reply                                                                                                                                                                                                                   | 1                                                                | Letter             | 0                           |
| 326 | Gender norms and the wellbeing of girls and boys                                                                                                                                                                                         | 1                                                                | Letter             | 0                           |
| 327 | Headway and hindrances for sexual and reproductive health and rights                                                                                                                                                                     | 1                                                                | Editorial Material | 0                           |
| 328 | Access to water and toilet facilities as a predictor of adherence to antiretroviral treatment in women living with HIV/AIDS in Zambia: a cross-sectional study                                                                           | 1                                                                | Meeting Abstract   | 0                           |

| No. | Title                                                                                                                                                                                                                                          | COVID-19-related publication = 0<br>non-COVID-19 publication = 1 | Document type      | Number of citations in 2021 |
|-----|------------------------------------------------------------------------------------------------------------------------------------------------------------------------------------------------------------------------------------------------|------------------------------------------------------------------|--------------------|-----------------------------|
| 329 | The forgotten parent: a qualitative study of indigenous Guatemalan fathers' perspectives on atypical child development                                                                                                                         | 1                                                                | Meeting Abstract   | 0                           |
| 330 | Patchy progress on the ICPD: are we asking the right questions?                                                                                                                                                                                | 1                                                                | Editorial Material | 0                           |
| 331 | The shift of obesity burden by socioeconomic status between 1998 and 2017 in Latin America and the Caribbean: a cross-sectional series study (vol 7, pg 1644, 2019)                                                                            | 1                                                                | Correction         | 0                           |
| 332 | Smoking tobacco, the major cause of death and disability in Cuba                                                                                                                                                                               | 1                                                                | Editorial Material | 0                           |
| 333 | Neighbourhood disadvantage and child behaviour in Montevideo, Uruguay: a mixed methods study                                                                                                                                                   | 1                                                                | Meeting Abstract   | 0                           |
| 334 | Development of HIV self-testing services through youth engagement: a qualitative evaluation of a health designathon in Nigeria                                                                                                                 | 1                                                                | Meeting Abstract   | 0                           |
| 335 | Moving the global disability agenda forward with scarce data                                                                                                                                                                                   | 1                                                                | Letter             | 0                           |
| 336 | Self-help or silenced voices? An ethnographically informed warning                                                                                                                                                                             | 1                                                                | Letter             | 1                           |
| 337 | Hospital El Salvador: broader questions remain                                                                                                                                                                                                 | 1                                                                | Letter             | 0                           |
| 338 | Bridging the gender equality gap in STEM to transform the pipeline in Africa: the African Research Academies for Women (ARA-W) summer research programme                                                                                       | 1                                                                | Meeting Abstract   | 0                           |
| 339 | Assessment of term newborn care recommendations in the curricula at a baccalaureate-level nursing school and tertiary public maternity hospital in western Kenya: an analysis of secondary data from a rapid, focused, ethnographic assessment | 1                                                                | Meeting Abstract   | 0                           |
| 340 | Cholera in Haiti                                                                                                                                                                                                                               | 1                                                                | Letter             | 0                           |
| 341 | Industry-sponsored antismoking advertisements in low-income countries                                                                                                                                                                          | 1                                                                | Letter             | 0                           |
| 342 | Knowledge production in humanitarian crises: beware of the innovation trap                                                                                                                                                                     | 1                                                                | Letter             | 0                           |
| 343 | Effect of facility-based HIV self-testing on uptake of testing among outpatients in Malawi: a cluster-randomised trial (vol 8, pg 276, 2020)                                                                                                   | 1                                                                | Correction         | 0                           |

| No. | Title                                                                                                                                                                                     | COVID-19-related publication = 0<br>non-COVID-19 publication = 1 | Document type      | Number of citations in 2021 |
|-----|-------------------------------------------------------------------------------------------------------------------------------------------------------------------------------------------|------------------------------------------------------------------|--------------------|-----------------------------|
| 344 | No antimicrobial resistance research agenda without tuberculosis                                                                                                                          | 1                                                                | Editorial Material | 0                           |
| 345 | Global access to quality-assured medical products: the Oxford Statement and call to action (vol 6, pg e1609, 2019)                                                                        | 1                                                                | Correction         | 0                           |
| 346 | A partnership to develop disaster simulations for nursing students in response to climate change: description of a programme in Bluefields, Nicaragua, and Virginia, USA                  | 1                                                                | Meeting Abstract   | 0                           |
| 347 | Challenges in quantifying the clear effect of malnutrition on diarrhoeal deaths                                                                                                           | 1                                                                | Editorial Material | 0                           |
| 348 | Routine childhood immunisation during the COVID-19 pandemic in Africa: a benefit-risk analysis of health benefits versus excess risk of SARS-CoV-2 infection (vol 8, pg e1264, 2020)      | 0                                                                | Correction         | 0                           |
| 349 | A vulnerability index for the management of and response to the COVID-19 epidemic in India: an ecological study (vol 8, pg e1142, 2020)                                                   | 0                                                                | Correction         | 0                           |
| 350 | Evaluation of a low-cost undergraduate digital medical curriculum platform in Rwanda: a mixed methods study                                                                               | 1                                                                | Meeting Abstract   | 0                           |
| 351 | Implementation of an e-learning model to build capacity of providers within a cervical cancer prevention programme in Africa: a successful experience in Cameroon                         | 1                                                                | Meeting Abstract   | 0                           |
| 352 | The global health community needs innovation and reform                                                                                                                                   | 1                                                                | Editorial Material | 0                           |
| 353 | Travel time to health-care facilities and HIV elimination in Malawi                                                                                                                       | 1                                                                | Editorial Material | 0                           |
| 354 | Correction to: Post-discharge prognosis of patients admitted to hospital for heart failure by world region, and national level of income and income disparity (REPORT-HF): a cohort study | 1                                                                | Letter             | 0                           |
| 355 | Care and community reintegration of homeless people living with severe mental disorders: a community-based mental health programme in Maryland County, Liberia                            | 1                                                                | Meeting Abstract   | 0                           |
| 356 | Barriers to, and recommendations for, the provision of care and support to children living as AIDS orphans in township communities in South Africa: a cluster analysis                    | 1                                                                | Meeting Abstract   | 0                           |
| 357 | The role of modelling to inform context-specific anaemia programming                                                                                                                      | 1                                                                | Editorial Material | 0                           |

| No. | Title                                                                                                                                                                                             | COVID-19-related publication = 0<br>non-COVID-19 publication = 1 | Document type      | Number of citations in 2021 |
|-----|---------------------------------------------------------------------------------------------------------------------------------------------------------------------------------------------------|------------------------------------------------------------------|--------------------|-----------------------------|
| 358 | Retraction-Chinese medical staff request international medical assistance in fighting against COVID-19                                                                                            | 0                                                                | Editorial Material | 0                           |
| 359 | Trends in sexual activity and demand for and use of modern contraceptive methods in 74 countries: a retrospective analysis of nationally representative surveys (vol 8, pg e567, 2020)            | 1                                                                | Correction         | 0                           |
| 360 | Winners and losers in the global trade in food                                                                                                                                                    | 1                                                                | Editorial Material | 0                           |
| 361 | Improving surgical quality in Colombia through indicators                                                                                                                                         | 1                                                                | Editorial Material | 0                           |
| 362 | Reaching the first 90 in the Democratic Republic of the Congo: a programme to optimise HIV case finding through intensified index testing                                                         | 1                                                                | Meeting Abstract   | 0                           |
| 363 | Advancing research ethics systems in Latin America and the Caribbean: a path for other LMICs? (vol 8, pg e23, 2020)                                                                               | 1                                                                | Correction         | 0                           |
| 364 | Transparency assessment of COVID-19 models (vol 8, pg 1459, 2020)                                                                                                                                 | 0                                                                | Correction         | 0                           |
| 365 | Assessing the diagnostic value of Xpert HPV Reply                                                                                                                                                 | 1                                                                | Letter             | 0                           |
| 366 | Post-discharge prognosis of patients admitted to hospital for heart failure by world region, and national level of income and income disparity (REPORT-HF): a cohort study (vol 8, pg e411, 2020) | 1                                                                | Correction         | 0                           |
| 367 | Towards a digitally-enabled, community-based responsive health system in Tanzania: a formative study for the Afya-Tek digitised health initiative                                                 | 1                                                                | Meeting Abstract   | 0                           |
| 368 | Corporate profits versus spending on non-communicable disease prevention: an unhealthy balance (vol 7, pg e1482, 2019)                                                                            | 1                                                                | Correction         | 0                           |
| 369 | Affordability of the EAT-Lancet reference diet: a global analysis (vol 8, pg 59, 2020)                                                                                                            | 1                                                                | Correction         | 0                           |
| 370 | Geospatial analysis: a new frontier in humanitarian health research?                                                                                                                              | 1                                                                | Editorial Material | 0                           |
| 371 | Delays in hospital admissions for patients with fractures                                                                                                                                         | 1                                                                | Letter             | 0                           |
| 372 | Delays in hospital admissions for patients with fractures                                                                                                                                         | 1                                                                | Letter             | 0                           |
| 373 | Bridging research to policy for the prevention and control of parasitic neglected tropical diseases in the Philippines: the                                                                       | 1                                                                | Meeting Abstract   | 0                           |



| No. | Title                                                                                                                                                   | COVID-19-related publication = 0<br>non-COVID-19 publication = 1 | Document type      | Number of citations in 2021 |
|-----|---------------------------------------------------------------------------------------------------------------------------------------------------------|------------------------------------------------------------------|--------------------|-----------------------------|
|     | War on Worms campaign                                                                                                                                   |                                                                  |                    |                             |
| 374 | Ensuring gender and social equity in health: an analysis of Nigeria's Social Health Insurance Scheme and Basic Health Care Provision Fund               | 1                                                                | Meeting Abstract   | 0                           |
| 375 | Gender and zoonotic pathogen risk in a resource-limited community at the livestock-wildlife interface, Mpumalanga, South Africa: a qualitative analysis | 1                                                                | Meeting Abstract   | 0                           |
| 376 | Elements of trust in peer review (and our annual thanks)                                                                                                | 1                                                                | Editorial Material | 0                           |
| 377 | Epidemiology of carotid atherosclerosis in Africa: a blind spot                                                                                         | 1                                                                | Letter             | 0                           |
| 378 | Assessing the diagnostic value of Xpert HPV                                                                                                             | 1                                                                | Letter             | 0                           |
| 379 | A multidimensional model of mentorship for emerging health research leaders: a longitudinal qualitative multiple case study                             | 1                                                                | Meeting Abstract   | 0                           |
| 380 | Beyond GDP as a measure of welfare: introducing the health-adjusted income metric                                                                       | 1                                                                | Meeting Abstract   | 0                           |
| 381 | Feasibility of controlling COVID-19                                                                                                                     | 0                                                                | Letter             | 0                           |
| 382 | Estimating vulnerability to COVID-19 in India                                                                                                           | 0                                                                | Letter             | 1                           |
| 383 | Back to school for malaria prevention: a new tool in the era of malaria elimination?                                                                    | 1                                                                | Editorial Material | 0                           |
| 384 | Early policy actions and emergency response to the COVID-19 pandemic in Mongolia: experiences and challenges (vol 8, pg e1234, 2020)                    | 0                                                                | Correction         | 0                           |
| 385 | Feasibility of controlling COVID-19                                                                                                                     | 0                                                                | Letter             | 0                           |
| 386 | Global access to quality-assured medical products: the Oxford Statement and call to action (vol 7, pg e1609, 2019)                                      | 1                                                                | Correction         | 0                           |
| 387 | No man left behind                                                                                                                                      | 1                                                                | Editorial Material | 0                           |
| 388 | Regular opium use and subsequent incidence of cancer                                                                                                    | 1                                                                | Editorial Material | 0                           |
| 389 | Palestinian and Israeli health professionals, let us work together!                                                                                     | 1                                                                | Letter             | 0                           |

| No. | Title                                                                                                                                                                                             | COVID-19-related publication = 0<br>non-COVID-19 publication = 1 | Document type      | Number of citations in 2021 |
|-----|---------------------------------------------------------------------------------------------------------------------------------------------------------------------------------------------------|------------------------------------------------------------------|--------------------|-----------------------------|
| 390 | The light of hope: focusing on shigella and ETEC infections                                                                                                                                       | 1                                                                | Editorial Material | 0                           |
| 391 | Pushing the boundaries of data to ensure gender equality across the life span                                                                                                                     | 1                                                                | Editorial Material | 0                           |
| 392 | Cholera in Haiti                                                                                                                                                                                  | 1                                                                | Letter             | 0                           |
| 393 | A historic achievement in a year of turmoil                                                                                                                                                       | 1                                                                | Editorial Material | 0                           |
| 394 | COVID-19 and maternal and perinatal outcomes                                                                                                                                                      | 0                                                                | Letter             | 0                           |
| 395 | Cardiovascular health research, training, and capacity building for the eradication of rheumatic fever and rheumatic heart disease in our lifetime: the inaugural Bongani Mayosi Memorial Lecture | 1                                                                | Article            | 0                           |
| 396 | No time for complacency on the road to gender equality                                                                                                                                            | 1                                                                | Editorial Material | 0                           |
| 397 | Entitled to a healthy, thriving future                                                                                                                                                            | 1                                                                | Editorial Material | 0                           |
| 398 | Addressing racial inequalities in a pandemic: data limitations and a call for critical analyses (Sep, 10.1016/52214-109X(20)30360-0, 2020)                                                        | 1                                                                | Correction         | 0                           |
| 399 | COVID-19 and risks to the supply and quality of tests, drugs, and vaccines (vol 8, pg e754, 2020)                                                                                                 | 0                                                                | Correction         | 0                           |
| 400 | Understanding community health needs and forging an academic global health partnership in Puebla, Mexico: a mixed methods study                                                                   | 1                                                                | Meeting Abstract   | 0                           |
| 401 | Exposure to improved nutrition from conception to age 2 years and adult cardiometabolic disease risk: a modelling study (vol 6, pg e875, 2018)                                                    | 1                                                                | Correction         | 0                           |
| 402 | Strengthening quality of care for children who are HEU                                                                                                                                            | 1                                                                | Editorial Material | 0                           |
| 403 | New ways to measure the effects of armed conflict in civilian population (vol 7, pg e1585, 2019)                                                                                                  | 1                                                                | Correction         | 0                           |

**Data source:** Web of Science

**Table S18 List of articles published in *Lancet Planetary Health* in 2020**

| No. | Title                                                                                                                                | COVID-19-related publication = 0<br>non-COVID-19 publication = 1 | Document type      | Number of citations in 2021 |
|-----|--------------------------------------------------------------------------------------------------------------------------------------|------------------------------------------------------------------|--------------------|-----------------------------|
| 1   | Climate change and COVID-19: reinforcing Indigenous food systems (vol 4, pg e381, 2020)                                              | 0                                                                | Correction         | 0                           |
| 2   | Australia burning                                                                                                                    | 1                                                                | Editorial Material | 4                           |
| 3   | Walking forwards, looking backwards                                                                                                  | 1                                                                | Editorial Material | 0                           |
| 4   | Climate change and COVID-19: reinforcing Indigenous food systems                                                                     | 0                                                                | Editorial Material | 11                          |
| 5   | Heat-related mortality: an urgent need to recognise and record                                                                       | 1                                                                | Letter             | 2                           |
| 6   | Interaction between residential greenness and air pollution mortality: analysis of the Chinese Longitudinal Healthy Longevity Survey | 1                                                                | Article            | 21                          |
| 7   | The IMO 2020 sulphur cap: a step forward for planetary health?                                                                       | 1                                                                | Editorial Material | 5                           |
| 8   | Long-term effects of PM2.5 on neurological disorders in the American Medicare population: a longitudinal cohort study                | 1                                                                | Article            | 23                          |
| 9   | Air pollution reduction and mortality benefit during the COVID-19 outbreak in China                                                  | 0                                                                | Editorial Material | 136                         |
| 10  | Planetary health research digest                                                                                                     | 1                                                                | Editorial Material | 0                           |
| 11  | Metal mining and birth defects: a case-control study in Lubumbashi, Democratic Republic of the Congo                                 | 1                                                                | Article            | 10                          |
| 12  | Public handwashing for basic hygiene in people experiencing homelessness                                                             | 1                                                                | Letter             | 0                           |
| 13  | COVID-19 and the future of food systems at the UNFCCC                                                                                | 0                                                                | Editorial Material | 5                           |
| 14  | Reduction in air pollution and attributable mortality due to COVID-19 lockdown                                                       | 0                                                                | Letter             | 7                           |
| 15  | Ecological grief and anxiety: the start of a healthy response to climate change? Comment                                             | 1                                                                | Editorial Material | 16                          |
| 16  | Association of ambient PM2.5 exposure with maternal bone strength in pregnant women from Mexico City: a longitudinal cohort study    | 1                                                                | Article            | 1                           |
| 17  | Overselling wildlife trade bans will not bolster conservation or pandemic preparedness                                               | 0                                                                | Editorial Material | 83                          |

| No. | Title                                                                                                                                                                           | COVID-19-related publication = 0<br>non-COVID-19 publication = 1 | Document type      | Number of citations in 2021 |
|-----|---------------------------------------------------------------------------------------------------------------------------------------------------------------------------------|------------------------------------------------------------------|--------------------|-----------------------------|
| 18  | A roadmap for intergenerational leadership in planetary health (vol 4, pg e306, 2020)                                                                                           | 1                                                                | Correction         | 0                           |
| 19  | Quantifying national responsibility for climate breakdown: an equality-based attribution approach for carbon dioxide emissions in excess of the planetary boundary              | 1                                                                | Article            | 26                          |
| 20  | Prevalence and distribution of schistosomiasis in human, livestock, and snail populations in northern Senegal: a One Health epidemiological study of a multi-host system        | 1                                                                | Article            | 14                          |
| 21  | Human dietary exposure to chemicals in sub-Saharan Africa: safety assessment through a total diet study                                                                         | 1                                                                | Article            | 3                           |
| 22  | People-centred surveillance: a narrative review of community-based surveillance among crisis-affected populations                                                               | 1                                                                | Review             | 3                           |
| 23  | Human mobility, climate change, and health: unpacking the connections                                                                                                           | 1                                                                | Editorial Material | 9                           |
| 24  | Health impact assessment of Philadelphia's 2025 tree canopy cover goals                                                                                                         | 1                                                                | Article            | 17                          |
| 25  | Climate change and gender-based health disparities                                                                                                                              | 1                                                                | Editorial Material | 5                           |
| 26  | A super-year for the environment                                                                                                                                                | 1                                                                | Editorial Material | 0                           |
| 27  | Sustainable health equity: achieving a net-zero UK                                                                                                                              | 1                                                                | Editorial Material | 2                           |
| 28  | Socioeconomic inequality in vulnerability to all-cause and cause-specific hospitalisation associated with temperature variability: a time-series study in 1814 Brazilian cities | 1                                                                | Article            | 5                           |
| 29  | Effect of restricted retail merchandising of discretionary food and beverages on population diet: a pragmatic randomised controlled trial                                       | 1                                                                | Article            | 5                           |
| 30  | Linking health justice, social justice, and climate justice                                                                                                                     | 1                                                                | Editorial Material | 6                           |
| 31  | A tale of two emergencies                                                                                                                                                       | 0                                                                | Editorial Material | 0                           |
| 32  | Selection of pesticides to reduce human and environmental health risks: a global guideline and minimum pesticides list                                                          | 1                                                                | Article            | 26                          |
| 33  | Support Indigenous food system biocultural diversity                                                                                                                            | 1                                                                | Letter             | 1                           |
| 34  | Associations of outdoor fine particulate air pollution and cardiovascular disease in 157 436 individuals from 21                                                                | 1                                                                | Article            | 25                          |

| No. | Title                                                                                                                                                                                        | COVID-19-related publication = 0<br>non-COVID-19 publication = 1 | Document type      | Number of citations in 2021 |
|-----|----------------------------------------------------------------------------------------------------------------------------------------------------------------------------------------------|------------------------------------------------------------------|--------------------|-----------------------------|
|     | high-income, middle-income, and low-income countries (PURE): a prospective cohort study                                                                                                      |                                                                  |                    |                             |
| 35  | COVID-19 reveals vulnerability of small-scale fisheries to global market systems                                                                                                             | 0                                                                | Letter             | 18                          |
| 36  | The Helsinki Declaration 2020: Europe that protects                                                                                                                                          | 1                                                                | Editorial Material | 2                           |
| 37  | Targeted change making for a healthy recovery                                                                                                                                                | 1                                                                | Editorial Material | 0                           |
| 38  | Fluorosis: an ongoing challenge for India                                                                                                                                                    | 1                                                                | Editorial Material | 4                           |
| 39  | Inequalities in life expectancy in six large Latin American cities from the SALURBAL study: an ecological analysis (vol 3, pg e503, 2019)                                                    | 1                                                                | Correction         | 0                           |
| 40  | Climate anxiety in young people: a call to action                                                                                                                                            | 1                                                                | Editorial Material | 15                          |
| 41  | Forward planning for disaster-related mass gatherings amid COVID-19                                                                                                                          | 0                                                                | Editorial Material | 7                           |
| 42  | Water, climate change, and COVID-19: prioritising those in water-stressed settings                                                                                                           | 0                                                                | Letter             | 3                           |
| 43  | What can the world learn from New Zealand on climate?                                                                                                                                        | 1                                                                | Editorial Material | 0                           |
| 44  | Post-COVID-19 spending                                                                                                                                                                       | 0                                                                | Editorial Material | 1                           |
| 45  | Planetary health research digest                                                                                                                                                             | 1                                                                | News Item          | 0                           |
| 46  | Superimposed threats to population health from tropical cyclones in the prevaccine era of COVID-19                                                                                           | 0                                                                | Editorial Material | 6                           |
| 47  | Vesper Flights                                                                                                                                                                               | 1                                                                | Book Review        | 0                           |
| 48  | Decline and denial                                                                                                                                                                           | 1                                                                | Editorial Material | 0                           |
| 49  | Combining the effects of increased atmospheric carbon dioxide on protein, iron, and zinc availability and projected climate change on global diets: a modelling study (vol 3, pg e307, 2019) | 1                                                                | Correction         | 0                           |
| 50  | Inspiring climate action without inducing climate despair Comment                                                                                                                            | 1                                                                | Editorial Material | 2                           |
| 51  | Public reporting of hydraulic fracturing chemicals in the USA, 2011-18: a before and after comparison of reporting formats                                                                   | 1                                                                | Article            | 5                           |

| No. | Title                                                                                                                                                                             | COVID-19-related publication = 0<br>non-COVID-19 publication = 1 | Document type      | Number of citations in 2021 |
|-----|-----------------------------------------------------------------------------------------------------------------------------------------------------------------------------------|------------------------------------------------------------------|--------------------|-----------------------------|
| 52  | India's air pollution: the need for city-centric plans and regulations                                                                                                            | 1                                                                | Letter             | 0                           |
| 53  | Unmet needs and behaviour during the Ebola response in Sierra Leone: a retrospective, mixed-methods analysis of community feedback from the Social Mobilization Action Consortium | 1                                                                | Article            | 5                           |
| 54  | Seasonality reversal of temperature attributable mortality projections due to previously unobserved extreme heat in Europe                                                        | 1                                                                | Editorial Material | 0                           |
| 55  | Mental health and climate change: tackling invisible injustice                                                                                                                    | 1                                                                | Editorial Material | 5                           |
| 56  | Cognition, heuristics, and biases behind environment-related behaviours (vol 2, pg e11, 2018)                                                                                     | 1                                                                | Correction         | 0                           |
| 57  | Africa's invasive species problem                                                                                                                                                 | 1                                                                | Editorial Material | 0                           |
| 58  | Strands of injustice                                                                                                                                                              | 1                                                                | Editorial Material | 0                           |
| 59  | Climate change: challenges and opportunities to scale up surgical, obstetric, and anaesthesia care globally                                                                       | 1                                                                | Review             | 5                           |
| 60  | Feedbacks from human health to household reliance on natural resources during the COVID-19 pandemic                                                                               | 0                                                                | Editorial Material | 2                           |
| 61  | Responding to COVID-19 requires strong epidemiological evidence of environmental and societal determining factors                                                                 | 0                                                                | Editorial Material | 6                           |
| 62  | A roadmap for intergenerational leadership in planetary health                                                                                                                    | 1                                                                | Editorial Material | 3                           |
| 63  | Mercury exposure and premature mortality in the Grassy Narrows First Nation community: a retrospective longitudinal study                                                         | 1                                                                | Article            | 4                           |
| 64  | Adaptive anxiety                                                                                                                                                                  | 1                                                                | Editorial Material | 1                           |
| 65  | Preparing mental health systems for climate crisis                                                                                                                                | 1                                                                | Editorial Material | 2                           |
| 66  | Household and personal air pollution exposure measurements from 120 communities in eight countries: results from the PURE-AIR study                                               | 1                                                                | Article            | 18                          |
| 67  | Origins of MERS-CoV, and lessons for 2019-nCoV                                                                                                                                    | 0                                                                | Letter             | 4                           |
| 68  | Environmental data justice                                                                                                                                                        | 1                                                                | Editorial Material | 0                           |

| No. | Title                                                                                                                                                                                            | COVID-19-related publication = 0<br>non-COVID-19 publication = 1 | Document type      | Number of citations in 2021 |
|-----|--------------------------------------------------------------------------------------------------------------------------------------------------------------------------------------------------|------------------------------------------------------------------|--------------------|-----------------------------|
| 69  | A call for global monitoring of WASH in wet markets                                                                                                                                              | 0                                                                | Editorial Material | 5                           |
| 70  | Time-weighted average of fine particulate matter exposure and cause-specific mortality in China: a nationwide analysis                                                                           | 1                                                                | Article            | 12                          |
| 71  | Defining diet quality: a synthesis of dietary quality metrics and their validity for the double burden of malnutrition                                                                           | 1                                                                | Review             | 32                          |
| 72  | Exposure to waste sites and their impact on health: a panel and geospatial analysis of nationally representative data from South Africa, 2008-2015                                               | 1                                                                | Article            | 5                           |
| 73  | Implementation of national policies for a total asbestos ban: a global comparison (vol 3, pg e341, 2019)                                                                                         | 1                                                                | Correction         | 0                           |
| 74  | COVID-19 and heatwaves: a double whammy for Indian cities                                                                                                                                        | 0                                                                | Editorial Material | 3                           |
| 75  | Reduction in air pollution and attributable mortality due to COVID-19 lockdown                                                                                                                   | 0                                                                | Letter             | 7                           |
| 76  | Effective transmission across the globe: the role of climate in COVID-19 mitigation strategies                                                                                                   | 0                                                                | Letter             | 35                          |
| 77  | Associations between commute mode and cardiovascular disease, cancer, and all-cause mortality, and cancer incidence, using linked Census data over 25 years in England and Wales: a cohort study | 1                                                                | Article            | 11                          |
| 78  | Arboviral diseases: the emergence of a major yet ignored public health threat in Africa                                                                                                          | 1                                                                | Letter             | 5                           |
| 79  | Turning point?                                                                                                                                                                                   | 1                                                                | Editorial Material | 0                           |
| 80  | Risk of cognitive impairment in children after maternal exposure to the 1998 Yangtze River flood during pregnancy: analysis of data from China's second National Sample Survey on Disability     | 1                                                                | Article            | 2                           |
| 81  | Projections of excess mortality related to diurnal temperature range under climate change scenarios: a multi-country modelling study                                                             | 1                                                                | Article            | 8                           |
| 82  | Weighing the risks                                                                                                                                                                               | 1                                                                | Editorial Material | 0                           |
| 83  | Successive epidemic waves of cholera in South Sudan between 2014 and 2017: a descriptive epidemiological study                                                                                   | 1                                                                | Article            | 0                           |
| 84  | COVID-19 and clean air: an opportunity for radical change                                                                                                                                        | 0                                                                | Editorial Material | 6                           |
| 85  | The burden of disease in Saudi Arabia 1990-2017: results from the Global Burden of Disease Study 2017                                                                                            | 1                                                                | Article            | 20                          |

| No. | Title                                                                                                                                                                         | COVID-19-related publication = 0<br>non-COVID-19 publication = 1 | Document type      | Number of citations in 2021 |
|-----|-------------------------------------------------------------------------------------------------------------------------------------------------------------------------------|------------------------------------------------------------------|--------------------|-----------------------------|
| 86  | 10 years to green the NHS and the health sector                                                                                                                               | 1                                                                | Editorial Material | 1                           |
| 87  | Improving nutrition and immunity with dry chain and integrated pest management food technologies in LMICs<br>Comment                                                          | 1                                                                | Editorial Material | 0                           |
| 88  | Mercury exposure and premature mortality in the Grassy Narrows First Nation community: a retrospective longitudinal study (vol 4, pg e141, 2020)                              | 1                                                                | Correction         | 0                           |
| 89  | Transnational corporations, obesity and planetary health<br>Comment                                                                                                           | 1                                                                | Editorial Material | 4                           |
| 90  | Shared sanitation and the spread of COVID-19: risks and next steps                                                                                                            | 0                                                                | Letter             | 17                          |
| 91  | A choice between two futures for pandemic recovery                                                                                                                            | 0                                                                | Editorial Material | 0                           |
| 92  | The neglected environmental impacts of ultra-processed foods                                                                                                                  | 1                                                                | Editorial Material | 16                          |
| 93  | Faecal contamination of the environment and child health: a systematic review and individual participant data meta-analysis                                                   | 1                                                                | Review             | 3                           |
| 94  | Conservation epidemiology of predators and scavengers reduce zoonotic risk                                                                                                    | 1                                                                | Editorial Material | 2                           |
| 95  | The environmental footprint of health care: a global assessment                                                                                                               | 1                                                                | Article            | 31                          |
| 96  | Mercury exposure and premature mortality in the Grassy Narrows First Nation community: a retrospective longitudinal study (vol 4, e141, 2020)                                 | 1                                                                | Correction         | 0                           |
| 97  | Exposure to air pollution during childhood and risk of developing schizophrenia: a national cohort study                                                                      | 1                                                                | Article            | 11                          |
| 98  | Recruiting health professionals as sustainability advocates                                                                                                                   | 1                                                                | Editorial Material | 3                           |
| 99  | Human faeces-associated extended-spectrum beta-lactamase-producing <i>Escherichia coli</i> discharge into sanitation systems in 2015 and 2030: a global and regional analysis | 1                                                                | Article            | 4                           |
| 100 | COVID-19, wet markets, and planetary health                                                                                                                                   | 0                                                                | Editorial Material | 12                          |
| 101 | Decarbonising economies is like denuclearising weaponry-essential for survival                                                                                                | 1                                                                | Editorial Material | 0                           |



| No. | Title                                                                                                                                 | COVID-19-related publication = 0<br>non-COVID-19 publication = 1 | Document type      | Number of citations in 2021 |
|-----|---------------------------------------------------------------------------------------------------------------------------------------|------------------------------------------------------------------|--------------------|-----------------------------|
| 102 | Planetary Health Research Digest                                                                                                      | 1                                                                | News Item          | 0                           |
| 103 | Carbon-neutral medical conferences should be the norm                                                                                 | 1                                                                | Editorial Material | 8                           |
| 104 | The Paris agreement: charting a low-emissions path for a child born today                                                             | 1                                                                | Editorial Material | 1                           |
| 105 | Picking winners                                                                                                                       | 1                                                                | Editorial Material | 0                           |
| 106 | Floods in China, COVID-19, and climate change                                                                                         | 0                                                                | Editorial Material | 9                           |
| 107 | Post-pandemic recovery: use of scientific advice to achieve social equity, planetary health, and economic benefits                    | 0                                                                | Editorial Material | 3                           |
| 108 | Mapping the co-benefits of climate change action to issues of public concern in the UK: a narrative review                            | 1                                                                | Review             | 9                           |
| 109 | Green space, health, and wellbeing: considerations for South Asia                                                                     | 1                                                                | Editorial Material | 5                           |
| 110 | Reimagining mental health systems post COVID-19                                                                                       | 0                                                                | Editorial Material | 0                           |
| 111 | Addressing the carbon footprint, healthfulness, and costs of self-selected diets in the USA: a population-based cross-sectional study | 1                                                                | Article            | 11                          |
| 112 | Scientists call for renewed Paris pledges to transform agriculture                                                                    | 1                                                                | Letter             | 4                           |
| 113 | A global analysis of urban design types and road transport injury: an image processing study                                          | 1                                                                | Article            | 5                           |
| 114 | Climate change worsens global inequity in maternal nutrition                                                                          | 1                                                                | Editorial Material | 2                           |
| 115 | COVID-19 as a global challenge: towards an inclusive and sustainable future                                                           | 0                                                                | Editorial Material | 41                          |
| 116 | The injustice of COVID-19: we need a moral constitution for our planet's health Comment                                               | 0                                                                | Editorial Material | 3                           |
| 117 | A planetary health perspective on COVID-19: a call for papers                                                                         | 0                                                                | Editorial Material | 6                           |
| 118 | Planetary health research digest                                                                                                      | 1                                                                | News Item          | 0                           |
| 119 | A prescription for Big Oil                                                                                                            | 1                                                                | Editorial Material | 0                           |
| 120 | Unveiling the environmental benefits of reducing sugar                                                                                | 1                                                                | Editorial Material | 2                           |
| 121 | Road user charging: a policy whose time has finally arrived                                                                           | 1                                                                | Editorial Material | 1                           |

| No. | Title                                                                                                                                                                                    | COVID-19-related publication = 0<br>non-COVID-19 publication = 1 | Document type      | Number of citations in 2021 |
|-----|------------------------------------------------------------------------------------------------------------------------------------------------------------------------------------------|------------------------------------------------------------------|--------------------|-----------------------------|
| 122 | Distribution of <i>Haemaphysalis longicornis</i> and associated pathogens: analysis of pooled data from a China field survey and global published data                                   | 1                                                                | Article            | 14                          |
| 123 | Food security in uncertain times                                                                                                                                                         | 1                                                                | Editorial Material | 0                           |
| 124 | What can COVID-19 teach us about responding to climate change?                                                                                                                           | 0                                                                | Letter             | 8                           |
| 125 | 2019-nCoV in context: lessons learned?                                                                                                                                                   | 0                                                                | Editorial Material | 9                           |
| 126 | Short-term exposure to ambient fine particulate matter and out-of-hospital cardiac arrest: a nationwide case-crossover study in Japan                                                    | 1                                                                | Article            | 12                          |
| 127 | Planting sustainable seeds in young minds: the need to teach planetary health to children                                                                                                | 1                                                                | Editorial Material | 5                           |
| 128 | Moving the Overton window                                                                                                                                                                | 1                                                                | Editorial Material | 0                           |
| 129 | Short-term and long-term health impacts of air pollution reductions from COVID-19 lockdowns in China and Europe: a modelling study                                                       | 0                                                                | Article            | 72                          |
| 130 | In sight but out of mind                                                                                                                                                                 | 1                                                                | Editorial Material | 0                           |
| 131 | The potential for atmospheric water harvesting to accelerate household access to safe water                                                                                              | 1                                                                | Editorial Material | 5                           |
| 132 | Environmental temperature and growth faltering in African children: a cross-sectional study                                                                                              | 1                                                                | Article            | 6                           |
| 133 | Associations between historical residential redlining and current age-adjusted rates of emergency department visits due to asthma across eight cities in California: an ecological study | 1                                                                | Article            | 33                          |
| 134 | Bushfires in Australia: a serious health emergency under climate change                                                                                                                  | 1                                                                | Editorial Material | 28                          |
| 135 | Amplifying the voice of youth through planetary health films                                                                                                                             | 1                                                                | Editorial Material | 0                           |
| 136 | Will the COVID-19 crisis trigger a One Health coming-of-age?                                                                                                                             | 0                                                                | Editorial Material | 9                           |
| 137 | Climate change could shift disease burden from malaria to arboviruses in Africa                                                                                                          | 1                                                                | Article            | 21                          |
| 138 | The effect of air pollution on deaths, disease burden, and life expectancy across China and its provinces, 1990-2017: an                                                                 | 1                                                                | Article            | 48                          |

| No. | Title                                                                                                         | COVID-19-related publication = 0<br>non-COVID-19 publication = 1 | Document type      | Number of citations in 2021 |
|-----|---------------------------------------------------------------------------------------------------------------|------------------------------------------------------------------|--------------------|-----------------------------|
|     | analysis for the Global Burden of Disease Study 2017                                                          |                                                                  |                    |                             |
| 139 | Nested ecology and emergence in pandemics                                                                     | 0                                                                | Editorial Material | 0                           |
| 140 | Nuclear war, climate change, and medical activism                                                             | 1                                                                | Editorial Material | 0                           |
| 141 | The future of environmental sustainability labelling on food products                                         | 1                                                                | Editorial Material | 6                           |
| 142 | Food system emissions                                                                                         | 1                                                                | Editorial Material | 0                           |
| 143 | Neoliberal economics, planetary health, and the COVID-19 pandemic: a Marxist ecofeminist analysis             | 0                                                                | Article            | 6                           |
| 144 | Effects of agrochemical pollution on schistosomiasis transmission: a systematic review and modelling analysis | 1                                                                | Review             | 6                           |
| 145 | Planetary health: young academics ask universities to act Comment                                             | 1                                                                | Editorial Material | 3                           |
| 146 | Bushfires in Australia: a serious health emergency under climate change (vol 4, pg e7, 2020)                  | 1                                                                | Correction         | 0                           |
| 147 | Training Canadian doctors for the health challenges of climate change                                         | 1                                                                | Editorial Material | 6                           |

**Data source:** Web of Science

**Table S19 List of articles published in *Pathogens and Global Health* in 2020**

| No. | Title                                                                                                                                                                                                                 | COVID-19-related publication = 0<br>non-COVID-19 publication = 1 | Document type      | Number of citations in 2021 |
|-----|-----------------------------------------------------------------------------------------------------------------------------------------------------------------------------------------------------------------------|------------------------------------------------------------------|--------------------|-----------------------------|
| 1   | Epidemiology, resistance characteristics, virulence determinants, and treatment outcomes of <i>Staphylococcus aureus</i> bone and joint infections: a one-year prospective study at a tertiary care hospital in India | 1                                                                | Article            | 0                           |
| 2   | Methicillin-resistant <i>Staphylococcus aureus</i> : epidemiology and antimicrobial susceptibility experiences from the University Hospital 'Luigi Vanvitelli' of Naples                                              | 1                                                                | Article            | 4                           |
| 3   | Overlapping of locust swarms with COVID-19 pandemic: a cascading disaster for Africa                                                                                                                                  | 0                                                                | Editorial Material | 4                           |
| 4   | Chikungunya fever in Africa: a systematic review                                                                                                                                                                      | 1                                                                | Review             | 6                           |
| 5   | Molecular detection and genotypic characterisation of <i>Streptococcus pneumoniae</i> isolated from children in Malaysia                                                                                              | 1                                                                | Article            | 3                           |
| 6   | Acute histoplasmosis in travelers: a retrospective study in an Italian referral center for tropical diseases                                                                                                          | 1                                                                | Article            | 1                           |
| 7   | Human immune response to <i>Phlebotomus sergentis</i> salivary gland antigens in a leishmaniasis-endemic focus in Iran                                                                                                | 1                                                                | Article            | 0                           |
| 8   | Expression levels of candidate circulating microRNAs in pediatric tuberculosis                                                                                                                                        | 1                                                                | Article            | 2                           |
| 9   | Critical appraisal of a mHealth-assisted community-based cardiovascular disease risk screening program in rural Kenya: an operational research study                                                                  | 1                                                                | Article            | 2                           |
| 10  | A holistic approach is needed to control the perpetual burden of soil-transmitted helminth infections among indigenous schoolchildren in Malaysia                                                                     | 1                                                                | Article            | 0                           |
| 11  | Immunodominant regions prediction of nucleocapsid protein for SARS-CoV-2 early diagnosis: a bioinformatics and immunoinformatics study                                                                                | 0                                                                | Article            | 5                           |
| 12  | <i>Toxoplasma gondii</i> infection and risk of attention-deficit hyperactivity disorder: a systematic review and meta-analysis                                                                                        | 1                                                                | Review             | 2                           |
| 13  | Public health concerns over gene-drive mosquitoes: will future use of gene-drive snails for schistosomiasis control gain increased level of community acceptance?                                                     | 1                                                                | Article            | 1                           |
| 14  | Cellular mechanisms regulating synthetic sex ratio distortion in the <i>Anopheles gambiae</i> germline                                                                                                                | 1                                                                | Article            | 3                           |

| No. | Title                                                                                                                                                                                | COVID-19-related publication = 0<br>non-COVID-19 publication = 1 | Document type      | Number of citations in 2021 |
|-----|--------------------------------------------------------------------------------------------------------------------------------------------------------------------------------------|------------------------------------------------------------------|--------------------|-----------------------------|
| 15  | Viricidal treatments for prevention of coronavirus infection                                                                                                                         | 1                                                                | Review             | 9                           |
| 16  | Forecasting tuberculosis using diabetes-related google trends data                                                                                                                   | 1                                                                | Article            | 2                           |
| 17  | COVID-19 and civil war in Libya: the current situation                                                                                                                               | 0                                                                | Article            | 8                           |
| 18  | Identification of bloodmeal sources of triatomines captured in the Paraguayan Chaco region of South America by means of molecular biology analysis                                   | 1                                                                | Article            | 7                           |
| 19  | Mortality from COVID-19: are we getting closer to the true value?                                                                                                                    | 0                                                                | Editorial Material | 3                           |
| 20  | Can lactoferrin boost human immunity against COVID-19?                                                                                                                               | 0                                                                | Article            | 5                           |
| 21  | Spa gene-based molecular typing of nasal methicillin-susceptible staphylococcus aureus from patients and health-care workers in a dialysis center in southeast Iran                  | 1                                                                | Article            | 0                           |
| 22  | Reduction of West Nile virus infections in Italy during 2020 early summer: a secondary 'COVID-19' effect?                                                                            | 0                                                                | Editorial Material | 3                           |
| 23  | COVID-19 challenge: proactive management of a Tertiary University Hospital in Veneto Region, Italy                                                                                   | 0                                                                | Article            | 1                           |
| 24  | A novel Ehrlichia strain (Rickettsiales: Anaplasmataceae) detected in Amblyomma triste (Acari: Ixodidae), a tick species of public health importance in the Southern Cone of America | 1                                                                | Article            | 6                           |
| 25  | Is time our ultimate ally in defying the pandemic?                                                                                                                                   | 0                                                                | Article            | 1                           |
| 26  | Current progress of immunoinformatics approach harnessed for cellular- and antibody-dependent vaccine design (vol 17, pg 234, 2018)                                                  | 1                                                                | Correction         | 0                           |
| 27  | Methicillin Resistant Staphylococcus aureus and public fomites: a review                                                                                                             | 1                                                                | Review             | 9                           |
| 28  | Detailed epidemiological analysis as a strategy for evaluating the actual behavior of tuberculosis in an apparently low-incidence region                                             | 1                                                                | Article            | 0                           |
| 29  | Antigenic membrane proteins of virulent variant of Entamoeba histolytica HM-1:IMSS                                                                                                   | 1                                                                | Article            | 1                           |
| 30  | Identification of suspected paragonimiasis-endemic foci using a questionnaire and detection of Paragonimus ova using                                                                 | 1                                                                | Article            | 0                           |

| No. | Title                                                                                                                                                                                        | COVID-19-related publication = 0<br>non-COVID-19 publication = 1 | Document type      | Number of citations in 2021 |
|-----|----------------------------------------------------------------------------------------------------------------------------------------------------------------------------------------------|------------------------------------------------------------------|--------------------|-----------------------------|
|     | the Ziehl-Neelsen technique in Zamboanga Region, the Philippines                                                                                                                             |                                                                  |                    |                             |
| 31  | Kidney biomarkers in tropical infections: an update                                                                                                                                          | 1                                                                | Article            | 0                           |
| 32  | Ebola crisis in Eastern Democratic Republic of Congo: student-led community engagement                                                                                                       | 1                                                                | Article            | 1                           |
| 33  | Intensity of pyrethroid resistance in <i>Anopheles culicifacies</i> s.l. (Diptera: Culicidae) in Odisha State, India                                                                         | 1                                                                | Article            | 5                           |
| 34  | The global spread of 2019-nCoV: a molecular evolutionary analysis                                                                                                                            | 0                                                                | Article            | 39                          |
| 35  | Nontuberculous mycobacterial infections in a Brazilian pediatric population: a seven-year survey                                                                                             | 1                                                                | Article            | 2                           |
| 36  | Research inequities: avoiding the next pandemic                                                                                                                                              | 1                                                                | Editorial Material | 0                           |
| 37  | Understanding the role that 'COVID toe' has in recognizing the potential extent of COVID-19 infections: a case study                                                                         | 0                                                                | Article            | 0                           |
| 38  | Impact of COVID-19 public health interventions on influenza incidence in Thailand                                                                                                            | 0                                                                | Editorial Material | 11                          |
| 39  | Hospital epidemiology and antimicrobial susceptibility of isolated methicillin-resistant <i>Staphylococcus aureus</i> : a one-year retrospective study at a tertiary care center in Thailand | 1                                                                | Article            | 1                           |
| 40  | Recommendation of fecal specimen for routine molecular detection of SARS-CoV-2 and for COVID-19 discharge criteria                                                                           | 0                                                                | Editorial Material | 3                           |
| 41  | <i>Cryptosporidium</i> infection among people living with HIV/AIDS in Ethiopia: a systematic review and meta-analysis                                                                        | 1                                                                | Review             | 3                           |
| 42  | Design a multi-epitope subunit vaccine for immune-protection against <i>Leishmania</i> parasite                                                                                              | 1                                                                | Article            | 4                           |
| 43  | Knowledge of human monkeypox viral infection among general practitioners: a cross-sectional study in Indonesia                                                                               | 1                                                                | Article            | 0                           |
| 44  | Fish-borne trematode infections in wild fishes in Bangladesh                                                                                                                                 | 1                                                                | Article            | 2                           |
| 45  | Validation of dried blood spots in monitoring toxoplasmosis                                                                                                                                  | 1                                                                | Article            | 1                           |
| 46  | Doses of primaquine administered to children with <i>Plasmodium vivax</i> according to an age-based dose regimen                                                                             | 1                                                                | Article            | 4                           |
| 47  | Sleeping space matters: LLINs usage in Ghana                                                                                                                                                 | 1                                                                | Article            | 0                           |
| 48  | The expanding <i>Anopheles gambiae</i> species complex                                                                                                                                       | 1                                                                | Editorial Material | 0                           |

| No. | Title                                                                                                                                                 | COVID-19-related publication = 0<br>non-COVID-19 publication = 1 | Document type      | Number of citations in 2021 |
|-----|-------------------------------------------------------------------------------------------------------------------------------------------------------|------------------------------------------------------------------|--------------------|-----------------------------|
| 49  | Late incidence of SARS-CoV-2 infection in a highly-endemic remote rural village. A prospective population-based cohort study                          | 0                                                                | Article            | 10                          |
| 50  | Decreased in-hospital mortality in patients with COVID-19 pneumonia                                                                                   | 0                                                                | Editorial Material | 13                          |
| 51  | A call to research: the relationship between SARS-2-CoV, ACE 2 and antihypertensives COMMENT                                                          | 0                                                                | Editorial Material | 1                           |
| 52  | Epidemiological dynamics and associated risk factors of <i>S. haematobium</i> in humans and its snail vectors in Nigeria: a meta-analysis (1983-2018) | 1                                                                | Article            | 3                           |
| 53  | A review of mechanistic models of viral dynamics in bat reservoirs for zoonotic disease                                                               | 1                                                                | Review             | 4                           |
| 54  | Genotyping and molecular characterization of clinical <i>Acinetobacter baumannii</i> isolates from a single hospital in Southwestern Iran             | 1                                                                | Article            | 2                           |
| 55  | Potential of the natural products against leishmaniasis in Old World-a review of in-vitro studies                                                     | 1                                                                | Review             | 6                           |
| 56  | Epidemiology of tungiasis in sub-saharan Africa: a systematic review and meta-analysis                                                                | 1                                                                | Review             | 0                           |
| 57  | Prevalence of fluoroquinolone-resistant <i>Salmonella</i> serotypes in Iran: a meta-analysis                                                          | 1                                                                | Article            | 1                           |
| 58  | Is glucose-6-phosphate dehydrogenase enzyme deficiency a factor in Coronavirus-19 (COVID-19) infections and deaths?                                   | 0                                                                | Editorial Material | 11                          |
| 59  | The impact of climate change on mosquito-borne diseases in Africa                                                                                     | 1                                                                | Article            | 4                           |
| 60  | Dealing with a pandemic: the Kerala Model of containment strategy for COVID-19                                                                        | 0                                                                | Editorial Material | 3                           |
| 61  | Prevalence Pattern of Chikungunya Virus Infection in Nigeria: A Four Decade Systematic Review and Meta-analysis                                       | 1                                                                | Review             | 1                           |
| 62  | Severe vivax malaria: a prospective exploration at a tertiary healthcare centre in Southwestern India (vol 111, pg 148, 2017)                         | 1                                                                | Correction         | 0                           |
| 63  | Concerns and public health challenges for arboviral and other respiratory infections amidst SARS-CoV-2 pandemic                                       | 0                                                                | Editorial Material | 1                           |
| 64  | Centralized air-conditioning and transmission of novel coronavirus                                                                                    | 0                                                                | Editorial Material | 4                           |

| No. | Title                                                                                                                                                                             | COVID-19-related publication = 0<br>non-COVID-19 publication = 1 | Document type | Number of citations in 2021 |
|-----|-----------------------------------------------------------------------------------------------------------------------------------------------------------------------------------|------------------------------------------------------------------|---------------|-----------------------------|
| 65  | Curcuma longa ethanol extract and Curcumin inhibit the growth of Acanthamoeba triangularis trophozoites and cysts isolated from water reservoirs at Walailak University, Thailand | 1                                                                | Article       | 4                           |
| 66  | Elevated levels of IL-8 in fatal leptospirosis                                                                                                                                    | 1                                                                | Article       | 0                           |
| 67  | Malaria education interventions addressing bed net care and repair practices: a systematic review                                                                                 | 1                                                                | Review        | 2                           |

**Data source:** Web of Science



**Table S20 List of articles published in *Tropical Medicine & International Health* in 2020**

| No. | Title                                                                                                                                                                           | COVID-19-related publication = 0<br>non-COVID-19 publication = 1 | Document type | Number of citations in 2021 |
|-----|---------------------------------------------------------------------------------------------------------------------------------------------------------------------------------|------------------------------------------------------------------|---------------|-----------------------------|
| 1   | Chronic lung disease in children and adolescents with HIV: a case-control study                                                                                                 | 1                                                                | Article       | 3                           |
| 2   | Can combined online and face-to-face continuing medical education improve the clinical knowledge and skills of family doctors in Vietnam? A cluster randomised controlled trial | 1                                                                | Article       | 1                           |
| 3   | Aquaporin-2 and NKCC2 expression pattern in patients with hepatosplenic schistosomiasis                                                                                         | 1                                                                | Article       | 1                           |
| 4   | The extent of chloroquine underdosing in adult patients with malaria by <i>Plasmodium vivax</i> from an endemic area of the Brazilian Amazon basin                              | 1                                                                | Article       | 0                           |
| 5   | Systematic review of interventions for reducing stigma experienced by children with disabilities and their families in low- and middle-income countries: state of the evidence  | 1                                                                | Review        | 6                           |
| 6   | Commercially approved vaccines for canine leishmaniosis: a review of available data on their safety and efficacy                                                                | 1                                                                | Review        | 14                          |
| 7   | Stability of extemporaneous sulfadiazine oral suspensions from commercially available tablets for treatment of congenital toxoplasmosis                                         | 1                                                                | Article       | 1                           |
| 8   | Frequency and management of non-obstetric fistula in the Democratic Republic of Congo: experience from the Fistula Care Plus project                                            | 1                                                                | Article       | 1                           |
| 9   | Critical evaluation of the appetite test for children with severe acute malnutrition                                                                                            | 1                                                                | Article       | 2                           |
| 10  | Factors associated with purchasing pesticide from shops for intentional self-poisoning in Sri Lanka                                                                             | 1                                                                | Article       | 0                           |
| 11  | Maternal mortality due to cardiac disease in low- and middle-income countries                                                                                                   | 1                                                                | Article       | 4                           |
| 12  | Spatial distribution and characteristics of HIV clusters in Ethiopia                                                                                                            | 1                                                                | Article       | 1                           |
| 13  | Exposure of consumers to substandard antibiotics from selected authorised and unauthorised medicine sales outlets in Ghana                                                      | 1                                                                | Article       | 1                           |
| 14  | Patterns, quality and appropriateness of surgical referrals in Malawi                                                                                                           | 1                                                                | Article       | 3                           |

| No. | Title                                                                                                                                                                             | COVID-19-related publication = 0<br>non-COVID-19 publication = 1 | Document type | Number of citations in 2021 |
|-----|-----------------------------------------------------------------------------------------------------------------------------------------------------------------------------------|------------------------------------------------------------------|---------------|-----------------------------|
| 15  | Direct and indirect patient costs of tuberculosis care in India                                                                                                                   | 1                                                                | Review        | 5                           |
| 16  | Human skin fibrosis: up-regulation of collagen type III gene transcription in the fibrotic skin nodules of lower limb lymphoedema                                                 | 1                                                                | Article       | 4                           |
| 17  | Old age is associated with decreased wealth in rural villages in Mtwara, Tanzania: findings from a cross-sectional survey                                                         | 1                                                                | Article       | 0                           |
| 18  | Challenges in the last mile of the global guinea worm eradication program                                                                                                         | 1                                                                | Review        | 1                           |
| 19  | Neglected tropical diseases in Brazil: lack of correlation between disease burden, research funding and output                                                                    | 1                                                                | Article       | 3                           |
| 20  | Prevalence of rheumatic heart disease in North-Central Nigeria: a school-based cross-sectional pilot study                                                                        | 1                                                                | Article       | 1                           |
| 21  | The roles of social economic status and undernutrition in regional disparities of the under-five mortality rate in Vietnam                                                        | 1                                                                | Article       | 0                           |
| 22  | Using ex-ante economic evaluation to inform research priorities in pesticide self-poisoning prevention: the case of a shop-based gatekeeper training programme in rural Sri Lanka | 1                                                                | Article       | 1                           |
| 23  | Willingness to use HIV self-test kits and willingness to pay among urban antenatal clients in Cote d'Ivoire and Tanzania: a cross-sectional study                                 | 1                                                                | Article       | 2                           |
| 24  | Regional variations of childhood immunisations in Senegal: a multilevel analysis                                                                                                  | 1                                                                | Article       | 0                           |
| 25  | Substantial reduction in child stunting is differentially associated to geographical and socioeconomic disparities in Misiones Province, Argentina                                | 1                                                                | Article       | 0                           |
| 26  | TB diagnostic cascade among patients registered under the Revised National TB Control Programme in Chennai, South India                                                           | 1                                                                | Article       | 0                           |
| 27  | Botanical monoterpenes synergise the toxicity of azamethiphos in the vector of Chagas disease, <i>Triatoma infestans</i> (Hemiptera: Reduviidae)                                  | 1                                                                | Article       | 0                           |
| 28  | Is World Malaria Day an effective awareness campaign? An evaluation of public interest in malaria during World Malaria Day                                                        | 1                                                                | Article       | 0                           |

| No. | Title                                                                                                                                                                              | COVID-19-related publication = 0<br>non-COVID-19 publication = 1 | Document type | Number of citations in 2021 |
|-----|------------------------------------------------------------------------------------------------------------------------------------------------------------------------------------|------------------------------------------------------------------|---------------|-----------------------------|
| 29  | Retinopathy in adults with hypertension and diabetes mellitus in Western Tanzania: a cross-sectional study                                                                         | 1                                                                | Article       | 0                           |
| 30  | Spatial inequalities in skilled attendance at birth in Ghana: a multilevel analysis integrating health facility databases with household survey data                               | 1                                                                | Article       | 2                           |
| 31  | Effectiveness of vaginal microbicides in preventing HIV transmission                                                                                                               | 1                                                                | Review        | 6                           |
| 32  | 'Know-Can' gap: gap between knowledge and skills related to childhood diarrhoea and pneumonia among frontline workers in rural Uttar Pradesh, India                                | 1                                                                | Article       | 0                           |
| 33  | Outcomes of patients on second- and third-line ART enrolled in ART adherence clubs in Maputo, Mozambique                                                                           | 1                                                                | Article       | 2                           |
| 34  | Health interventions among mobile pastoralists: a systematic review to guide health service design                                                                                 | 1                                                                | Review        | 0                           |
| 35  | Association between HIV stigma and antiretroviral therapy adherence among adults living with HIV: baseline findings from the HPTN 071 (PopART) trial in Zambia and South Africa    | 1                                                                | Article       | 1                           |
| 36  | Environmental and anthropogenic factors associated with increased malaria incidence in South-Kivu Province, Democratic Republic of the Congo                                       | 1                                                                | Article       | 0                           |
| 37  | Elevated body mass index during pregnancy and gestational weight gain in HIV-infected and HIV-uninfected women in Cape Town, South Africa: association with adverse birth outcomes | 1                                                                | Article       | 3                           |
| 38  | Burden of schistosomiasis-related mortality in Brazil: epidemiological patterns and spatial-temporal distribution, 2003-2018                                                       | 1                                                                | Article       | 2                           |
| 39  | The prevalence, diagnosis and surgical risk factors of spinal tuberculosis in children                                                                                             | 1                                                                | Article       | 0                           |
| 40  | Impact of diagnostic methods on efficacy estimation - a proof-of-principle based on historical examples                                                                            | 1                                                                | Article       | 4                           |
| 41  | Patient-incurred cost of inpatient treatment for Tuberculosis in rural Malawi                                                                                                      | 1                                                                | Article       | 1                           |
| 42  | What happens at adolescent and young adult HIV clinics? A national survey of models of care, transition and disclosure practices in Kenya                                          | 1                                                                | Article       | 1                           |

| No. | Title                                                                                                                                                                                       | COVID-19-related publication = 0<br>non-COVID-19 publication = 1 | Document type      | Number of citations in 2021 |
|-----|---------------------------------------------------------------------------------------------------------------------------------------------------------------------------------------------|------------------------------------------------------------------|--------------------|-----------------------------|
| 43  | Impact of integrated mental health care on food insecurity of households of people with severe mental illness in a rural African district: a community-based, controlled before-after study | 1                                                                | Article            | 1                           |
| 44  | Nutritional, clinical and immunological status of children at HIV diagnosis in the continental region of Equatorial Guinea                                                                  | 1                                                                | Article            | 0                           |
| 45  | Suppurative otitis media in Angola: clinical and demographic features                                                                                                                       | 1                                                                | Article            | 0                           |
| 46  | Impact of sickle cell disease on presentation and progression of paediatric HIV: a retrospective cohort study                                                                               | 1                                                                | Article            | 0                           |
| 47  | Variation in competent and respectful delivery care in Kenya and Malawi: a retrospective analysis of national facility surveys                                                              | 1                                                                | Article            | 4                           |
| 48  | Process evaluation for the delivery of a water, sanitation and hygiene mobile health program: findings from the randomised controlled trial of the CHoBI7 mobile health program             | 1                                                                | Article            | 2                           |
| 49  | Use of pre-ART laboratory screening to identify renal, hepatic and haematological abnormalities in Cote d'Ivoire                                                                            | 1                                                                | Article            | 0                           |
| 50  | Spatio-temporal dynamics of <i>Aedes aegypti</i> and <i>Aedes albopictus</i> oviposition in an urban area of northeastern Brazil                                                            | 1                                                                | Article            | 0                           |
| 51  | Clinical and laboratory predictors of 30-day mortality in severe acute malnourished children with severe pneumonia                                                                          | 1                                                                | Article            | 3                           |
| 52  | Inflammation during <i>Schistosoma haematobium</i> infection and anti-allergy in pre-school-aged children living in a rural endemic area in Zimbabwe                                        | 1                                                                | Article            | 1                           |
| 53  | 4-month moxifloxacin containing regimens in the treatment of patients with sputum-positive pulmonary tuberculosis in South India - a randomised clinical trial                              | 1                                                                | Article            | 5                           |
| 54  | Mobile pastoralists in Africa: a blind spot in global health surveillance                                                                                                                   | 1                                                                | Editorial Material | 0                           |
| 55  | The process of implementing child mortality reviews in low- and middle-income countries: a narrative systematic review                                                                      | 1                                                                | Review             | 0                           |
| 56  | Diarrhoeal children with concurrent severe wasting and stunting compared to severe wasting or severe stunting                                                                               | 1                                                                | Article            | 1                           |

| No. | Title                                                                                                                                                                                               | COVID-19-related publication = 0<br>non-COVID-19 publication = 1 | Document type | Number of citations in 2021 |
|-----|-----------------------------------------------------------------------------------------------------------------------------------------------------------------------------------------------------|------------------------------------------------------------------|---------------|-----------------------------|
| 57  | High fever after sublingual administration of misoprostol for treatment of post-partum haemorrhage: a hospital-based, prospective observational study in Argentina                                  | 1                                                                | Article       | 1                           |
| 58  | Association of TP53 rs1042522 with cervical cancer in the sub-Saharan African population: a meta-analysis                                                                                           | 1                                                                | Review        | 3                           |
| 59  | Health workers' views on audit in maternal and newborn healthcare in LMICs: a qualitative evidence synthesis                                                                                        | 1                                                                | Review        | 1                           |
| 60  | Tuberculosis treatment outcomes and associated factors in two states in Nigeria                                                                                                                     | 1                                                                | Article       | 0                           |
| 61  | Effect of a free healthcare policy on health services utilisation for non-malarial febrile illness by children under five years in Burkina Faso: an interrupted time series analysis                | 1                                                                | Article       | 0                           |
| 62  | Diarrhoeal disease knowledge among diarrhoea patient households: findings from the randomised controlled trial of the Cholera-Hospital-Based-Intervention-for-7-days (CHoBI7) mobile health program | 1                                                                | Article       | 1                           |
| 63  | Tuberculosis disease and infection among household contacts of bacteriologically confirmed and non-confirmed tuberculosis patients                                                                  | 1                                                                | Article       | 1                           |
| 64  | Micro-elimination of hepatitis C through testing of Egyptian pregnant women presenting at delivery: implications for screening policies                                                             | 1                                                                | Article       | 2                           |
| 65  | Socioeconomic associations of poorly controlled epilepsy in the Republic of Guinea: cross-sectional study                                                                                           | 1                                                                | Article       | 1                           |
| 66  | Tropical pyomyositis: an update                                                                                                                                                                     | 1                                                                | Review        | 3                           |
| 67  | Changing trends in measles vaccination status between 2004 and 2014 among children aged 12-23 months in Bangladesh                                                                                  | 1                                                                | Article       | 1                           |
| 68  | Availability, price and affordability of essential medicines for managing cardiovascular diseases and diabetes: a statewide survey in Kerala, India                                                 | 1                                                                | Article       | 1                           |
| 69  | Examining the distribution of benefits of a free Maternal and Child Health programme in Enugu State, Nigeria: a benefit incidence analysis                                                          | 1                                                                | Article       | 0                           |
| 70  | Neurocognitive functioning in MDR-TB patients with and without HIV in KwaZulu-Natal, South Africa                                                                                                   | 1                                                                | Article       | 1                           |

| No. | Title                                                                                                                                                                                                         | COVID-19-related publication = 0<br>non-COVID-19 publication = 1 | Document type | Number of citations in 2021 |
|-----|---------------------------------------------------------------------------------------------------------------------------------------------------------------------------------------------------------------|------------------------------------------------------------------|---------------|-----------------------------|
| 71  | Determinants of multidrug-resistant tuberculosis in Sao Paulo-Brazil: a multilevel Bayesian analysis of factors associated with individual, community and access to health services                           | 1                                                                | Article       | 4                           |
| 72  | Implementation of community and facility-based HIV self-testing under routine conditions in southern Eswatini                                                                                                 | 1                                                                | Article       | 1                           |
| 73  | Sensitivity of C-reactive protein for the identification of patients with laboratory-confirmed bacterial infections in northern Tanzania                                                                      | 1                                                                | Article       | 3                           |
| 74  | Provider- and patient-level costs associated with providing antiretroviral therapy during the postpartum phase to women living with HIV in South Africa: A cost comparison of three postpartum models of care | 1                                                                | Article       | 0                           |
| 75  | Estimating retention in HIV care accounting for clinic transfers using electronic medical records: evidence from a large antiretroviral treatment programme in the Western Cape, South Africa                 | 1                                                                | Article       | 2                           |
| 76  | Attitudes towards female genital cutting among adolescents in rural Burkina Faso: a multilevel analysis                                                                                                       | 1                                                                | Article       | 3                           |
| 77  | A model to predict SARS-CoV-2 infection based on the first three-month surveillance data in Brazil                                                                                                            | 0                                                                | Article       | 3                           |
| 78  | Child mouthing of soil and presence of animals in child sleeping spaces are associated with growth faltering among young children in Dhaka, Bangladesh (CHoBI7 Program)                                       | 1                                                                | Article       | 5                           |
| 79  | Clinical morbidity associated with Schistosoma haematobium infection in pre-school age children from an endemic district in Zimbabwe                                                                          | 1                                                                | Article       | 0                           |
| 80  | Equity dimensions of the decline in under-five mortality in Ghana: a joinpoint regression analysis                                                                                                            | 1                                                                | Article       | 0                           |
| 81  | Association between treatment with oral third-generation cephalosporin antibiotics and mortality outcomes in Ebola virus disease: a multinational retrospective cohort study                                  | 1                                                                | Article       | 0                           |
| 82  | Unfavourable treatment outcomes in tuberculosis patients with different vitamin D status and blood glucose levels in a programme setting in China                                                             | 1                                                                | Article       | 1                           |
| 83  | Prospective cohort study of child mouthing of faeces and fomites in Dhaka, Bangladesh (CHoBI7 Program)                                                                                                        | 1                                                                | Article       | 2                           |

| No. | Title                                                                                                                                                                                                                                      | COVID-19-related publication = 0<br>non-COVID-19 publication = 1 | Document type      | Number of citations in 2021 |
|-----|--------------------------------------------------------------------------------------------------------------------------------------------------------------------------------------------------------------------------------------------|------------------------------------------------------------------|--------------------|-----------------------------|
| 84  | Effect of a water, sanitation and hygiene program on handwashing with soap among household members of diarrhoea patients in healthcare facilities in Bangladesh: a cluster-randomised controlled trial of the CHoBI7 mobile health program | 1                                                                | Article            | 2                           |
| 85  | Pathogen-specific risk of seizure in children with moderate-to-severe diarrhoea: Case control study with follow-up                                                                                                                         | 1                                                                | Article            | 1                           |
| 86  | Epidemiology of Chagas disease in pregnant women and congenital transmission of <i>Trypanosoma cruzi</i> in the Americas: systematic review and meta-analysis                                                                              | 1                                                                | Review             | 6                           |
| 87  | Potential distribution of main malaria vector species in the endemic Colombian Pacific region                                                                                                                                              | 1                                                                | Article            | 1                           |
| 88  | Effect of adding azithromycin to the antimalarials used for seasonal malaria chemoprevention on the nutritional status of African children                                                                                                 | 1                                                                | Article            | 1                           |
| 89  | Tropical Medicine and International Health and the 2030 Agenda for Sustainable Development                                                                                                                                                 | 1                                                                | Editorial Material | 2                           |
| 90  | Predictors of receiving a diagnosis, referral and treatment of depression in people on antiretroviral therapy in South African primary care: a secondary analysis of data from a randomised trial                                          | 1                                                                | Article            | 0                           |
| 91  | Circulating <i>Trypanosoma cruzi</i> load and major cardiovascular outcomes in patients with chronic Chagas cardiomyopathy: a prospective cohort study                                                                                     | 1                                                                | Article            | 2                           |
| 92  | Feeding modifications and additional primary caregiver support for infants exposed to Zika virus or diagnosed with congenital Zika syndrome: a rapid review of the evidence                                                                | 1                                                                | Review             | 0                           |
| 93  | Accuracy of diagnostic tests for American tegumentary leishmaniasis: a systematic literature review with meta-analyses                                                                                                                     | 1                                                                | Review             | 3                           |
| 94  | Aflatoxin exposure in pregnant women of mixed status of human immunodeficiency virus infection and rate of gestational weight gain: a Ugandan cohort study                                                                                 | 1                                                                | Article            | 4                           |
| 95  | Incidence, risk factors and clinical characteristics of extra-pulmonary tuberculosis patients: a ten-year study in the North of Iran                                                                                                       | 1                                                                | Article            | 2                           |

| No. | Title                                                                                                                                                                                                                                     | COVID-19-related publication = 0<br>non-COVID-19 publication = 1 | Document type | Number of citations in 2021 |
|-----|-------------------------------------------------------------------------------------------------------------------------------------------------------------------------------------------------------------------------------------------|------------------------------------------------------------------|---------------|-----------------------------|
| 96  | Systematic review and meta-analysis of the prevalence of smokeless tobacco consumption among adults in Bangladesh, India and Myanmar                                                                                                      | 1                                                                | Review        | 0                           |
| 97  | Epidemiology and surveillance of human (neuro)cysticercosis in Europe: is enhanced surveillance required?                                                                                                                                 | 1                                                                | Article       | 2                           |
| 98  | Ivermectin for causal malaria prophylaxis: a randomised controlled human infection trial                                                                                                                                                  | 1                                                                | Article       | 6                           |
| 99  | The potential for quality assurance systems to save costs and lives: the case of early infant diagnosis of HIV                                                                                                                            | 1                                                                | Article       | 1                           |
| 100 | Does performance-based financing curb stock-outs of essential medicines? Results from a randomised controlled trial in Cameroon                                                                                                           | 1                                                                | Article       | 2                           |
| 101 | High turnaround times and low viral resuppression rates after reinforced adherence counselling following a confirmed virological failure diagnostic algorithm in HIV-infected patients on first-line antiretroviral therapy from Tanzania | 1                                                                | Article       | 3                           |
| 102 | Impact of mHealth on contraceptive use among women and men of reproductive age in low- and middle-income countries: a systematic review and meta-analysis                                                                                 | 1                                                                | Review        | 0                           |
| 103 | Seasonality and coinfection of bronchiolitis: epidemiological specificity and consequences in terms of prophylaxis in tropical climate                                                                                                    | 1                                                                | Article       | 1                           |
| 104 | Analysis and spatial distribution of schistosomiasis mansoni in a historically endemic area of northeastern Brazil                                                                                                                        | 1                                                                | Article       | 0                           |
| 105 | Cardiovascular disease among people living with HIV in Brazil                                                                                                                                                                             | 1                                                                | Article       | 1                           |
| 106 | The relationship between mental health conditions and hearing loss in low- and middle-income countries                                                                                                                                    | 1                                                                | Review        | 1                           |
| 107 | Identification of Plasmodium knowlesi Merozoite Surface Protein-1(19) (PkMSP-1(19)) novel binding peptides from a phage display library                                                                                                   | 1                                                                | Article       | 0                           |
| 108 | Seasonal incidence of respiratory viral infections in Telangana, India: utility of a multiplex PCR assay to bridge the knowledge gap                                                                                                      | 1                                                                | Article       | 1                           |
| 109 | Spatial patterns and temporal tendency of mortality related to Chagas disease in an endemic area of northeastern Brazil                                                                                                                   | 1                                                                | Article       | 2                           |



| No. | Title                                                                                                                                                        | COVID-19-related publication = 0<br>non-COVID-19 publication = 1 | Document type | Number of citations in 2021 |
|-----|--------------------------------------------------------------------------------------------------------------------------------------------------------------|------------------------------------------------------------------|---------------|-----------------------------|
| 110 | Achieving a high cure rate with direct-acting antivirals for chronic Hepatitis C virus infection in Cameroon: a multi-clinic demonstration project           | 1                                                                | Article       | 0                           |
| 111 | Eating disorders, body image and media exposure among adolescent girls in rural Burkina Faso                                                                 | 1                                                                | Article       | 9                           |
| 112 | Patterns of healthcare seeking among people reporting chronic conditions in rural sub-Saharan Africa: findings from a population-based study in Burkina Faso | 1                                                                | Article       | 0                           |
| 113 | Malathion insecticide resistance in <i>Aedes aegypti</i> : laboratory conditions and in situ experimental approach through adult entomological surveillance  | 1                                                                | Article       | 0                           |
| 114 | Improving mental health literacy in adolescents: systematic review of supporting intervention studies                                                        | 1                                                                | Review        | 7                           |
| 115 | Infection by <i>Strongyloides stercoralis</i> in immigrants with Chagas disease: evaluation of eosinophilia as screening method in primary care              | 1                                                                | Article       | 1                           |
| 116 | Quantity vs. quality: an assessment of the current pipeline for rabies                                                                                       | 1                                                                | Article       | 0                           |
| 117 | Are out-of-school adolescents at higher risk of adverse health outcomes? Evidence from 9 diverse settings in sub-Saharan Africa                              | 1                                                                | Article       | 4                           |
| 118 | National tuberculosis prevalence surveys in Africa, 2008-2016: an overview of results and lessons learned                                                    | 1                                                                | Article       | 6                           |
| 119 | Surveillance strategies for the detection of disease outbreaks in the Pacific islands: meta-analysis of published literature, 2010-2019                      | 1                                                                | Article       | 2                           |
| 120 | Spatial fine-resolution model of malaria risk for the Colombian Pacific region                                                                               | 1                                                                | Article       | 1                           |
| 121 | Hyperuricaemia and its association with 10-year risk of cardiovascular disease among migrant and non-migrant African populations: the RODAM study            | 1                                                                | Article       | 3                           |
| 122 | Factors associated with healthcare seeking behaviour for children in Malawi: 2016                                                                            | 1                                                                | Article       | 0                           |
| 123 | Absolute eosinophil count correlates with temperature and CD4 count independently of HIV infection among tuberculosis patients                               | 1                                                                | Article       | 0                           |

| No. | Title                                                                                                                              | COVID-19-related publication = 0<br>non-COVID-19 publication = 1 | Document type      | Number of citations in 2021 |
|-----|------------------------------------------------------------------------------------------------------------------------------------|------------------------------------------------------------------|--------------------|-----------------------------|
| 124 | Prevalence of multidrug-resistant tuberculosis in Latin America and the Caribbean: a systematic review and meta-analysis           | 1                                                                | Review             | 1                           |
| 125 | Household flooring associated with reduced infant diarrhoeal illness in Zimbabwe in households with and without WASH interventions | 1                                                                | Article            | 3                           |
| 126 | The COVID-19 epidemic                                                                                                              | 0                                                                | Editorial Material | 468                         |

**Data source:** Web of Science

Table S21 Extracted raw data of non-COVID-19 publications for ITSA

| Journals<br>Months | A        | B  | C  | D  | E  | F  | G  | H | I  | J | K  | L  | M  | N  | O  | P  | Q  | R  | S  | T  |
|--------------------|----------|----|----|----|----|----|----|---|----|---|----|----|----|----|----|----|----|----|----|----|
|                    | Jan.2018 | 0  | 24 | 10 | 6  | 15 | 2  | 3 | 3  | 0 | 4  | 14 | 14 | 11 | 15 | 0  | 4  | 27 | 10 | 4  |
| Feb.2018           | 0        | 20 | 11 | 6  | 8  | 1  | 0  | 3 | 0  | 5 | 8  | 8  | 28 | 1  |    | 9  | 23 | 11 | 8  | 9  |
| Mar.2018           | 0        | 19 | 12 | 11 | 18 | 0  | 2  | 3 | 20 | 2 | 14 | 11 | 13 | 16 | 0  | 7  | 30 | 13 | 7  | 10 |
| Apr.2018           | 24       | 31 | 9  | 3  | 5  | 3  | 5  | 2 | 0  | 5 | 9  | 10 | 7  |    | 0  | 5  | 20 | 9  | 3  | 12 |
| May.2018           | 0        | 19 | 10 | 8  | 9  | 3  | 7  | 3 | 0  | 4 | 13 | 11 | 9  | 15 | 1  | 5  | 25 | 12 | 3  | 19 |
| Jun.2018           | 0        | 20 | 11 | 7  | 10 | 4  | 3  | 3 | 18 | 2 | 1  | 7  | 3  |    | 0  | 16 | 17 | 9  | 3  | 15 |
| Jul.2018           | 11       | 15 | 8  | 9  | 10 | 0  | 2  | 3 | 0  | 3 | 5  | 16 | 15 | 15 | 0  | 10 | 26 | 11 | 4  | 7  |
| Aug.2018           | 26       | 11 | 11 | 10 | 13 | 2  | 1  | 3 | 0  | 2 | 16 | 14 | 7  |    | 0  | 3  | 27 | 9  | 3  | 12 |
| Sep.2018           | 1        | 23 | 12 | 7  | 8  | 0  | 1  | 3 | 0  | 2 | 7  | 2  | 8  | 15 | 0  | 16 | 40 | 11 | 3  | 3  |
| Oct.2018           | 4        | 51 | 9  | 6  | 13 | 3  | 4  | 3 | 26 | 5 | 6  | 6  | 8  |    | 0  | 14 | 27 | 10 | 5  | 27 |
| Nov.2018           | 26       | 26 | 9  | 9  | 15 | 0  | 3  | 3 | 0  | 4 | 10 | 20 | 12 | 10 | 0  | 12 | 9  | 12 | 5  | 10 |
| Dec.2018           | 0        | 24 | 10 | 9  | 3  | 1  | 5  | 4 | 17 | 3 | 3  | 3  | 7  |    | 38 | 17 | 20 | 10 | 4  | 13 |
| Jan.2019           | 15       | 29 | 8  | 9  | 15 | 0  | 1  | 3 | 0  | 2 | 6  | 9  | 10 | 10 | 1  | 9  | 24 | 13 | 1  | 12 |
| Feb.2019           | 3        | 24 | 13 | 13 | 8  | 0  | 0  | 3 | 0  | 0 | 14 | 9  | 5  |    | 0  | 13 | 34 | 16 | 3  | 13 |
| Mar.2019           | 30       | 18 | 10 | 13 | 4  | 2  | 2  | 4 | 26 | 0 | 10 | 8  | 9  | 10 | 4  | 9  | 34 | 16 | 6  | 10 |
| Apr.2019           | 14       | 29 | 9  | 13 | 8  | 1  | 20 | 2 | 0  | 2 | 6  | 5  | 6  |    | 0  | 16 | 21 | 9  | 4  | 7  |
| May.2019           | 11       | 24 | 10 | 9  | 18 | 1  | 0  | 4 | 0  | 5 | 10 | 3  | 8  | 10 | 5  | 5  | 38 | 11 | 4  | 8  |
| Jun.2019           | 16       | 27 | 10 | 6  | 9  | 0  | 3  | 3 | 15 | 2 | 15 | 7  | 5  |    | 8  | 24 | 26 | 11 | 2  | 8  |
| Jul.2019           | 19       | 42 | 8  | 11 | 13 | 0  | 3  | 2 | 0  | 4 | 8  | 8  | 17 | 10 | 3  | 11 | 25 | 10 | 1  | 11 |
| Aug.2019           | 6        | 46 | 10 | 18 | 4  | 0  | 6  | 4 | 13 | 4 | 16 | 1  | 2  |    | 4  | 6  | 33 | 7  | 3  | 12 |
| Sep.2019           | 3        | 42 | 9  | 12 | 12 | 3  | 1  | 3 | 13 | 0 | 9  | 4  | 0  | 7  | 5  | 4  | 27 | 5  | 2  | 5  |

| <b>Journals</b> | <b>A</b> | <b>B</b> | <b>C</b> | <b>D</b> | <b>E</b> | <b>F</b> | <b>G</b> | <b>H</b> | <b>I</b> | <b>J</b> | <b>K</b> | <b>L</b> | <b>M</b> | <b>N</b> | <b>O</b> | <b>P</b> | <b>Q</b> | <b>R</b> | <b>S</b> | <b>T</b> |
|-----------------|----------|----------|----------|----------|----------|----------|----------|----------|----------|----------|----------|----------|----------|----------|----------|----------|----------|----------|----------|----------|
| <b>Oct.2019</b> | 8        | 31       | 13       | 15       | 12       | 0        | 1        | 3        | 0        | 7        | 15       | 2        | 18       |          | 8        | 28       | 35       | 8        | 4        | 13       |
| <b>Nov.2019</b> | 9        | 36       | 7        | 11       | 12       | 1        | 3        | 4        | 0        | 0        | 4        | 19       | 12       | 8        | 6        | 11       | 29       | 7        | 3        | 28       |
| <b>Dec.2019</b> | 11       | 28       | 12       | 16       | 3        | 0        | 11       | 3        | 13       | 1        | 12       | 12       | 8        | 7        | 6        | 18       | 39       | 8        | 6        | 13       |
| <b>Jan.2020</b> | 7        | 25       | 10       | 29       | 10       | 0        | 0        | 2        | 0        | 4        | 18       | 12       | 12       | 8        | 9        | 4        | 23       | 8        | 12       | 12       |
| <b>Feb.2020</b> | 18       | 25       | 12       | 27       | 6        | 1        | 0        | 3        | 0        | 2        | 11       | 4        | 7        | 7        | 7        | 18       | 23       | 7        | 5        | 6        |
| <b>Mar.2020</b> | 9        | 30       | 14       | 27       | 17       | 0        | 3        | 4        | 11       | 2        | 8        | 10       | 8        | 8        | 1        | 30       | 27       | 5        | 6        | 12       |
| <b>Apr.2020</b> | 13       | 34       | 15       | 26       | 4        | 1        | 1        | 3        | 0        | 0        | 14       | 8        | 7        | 8        | 7        | 29       | 23       | 10       | 7        | 11       |
| <b>May.2020</b> | 5        | 31       | 10       | 21       | 5        | 0        | 5        | 3        | 0        | 5        | 15       | 9        | 1        | 7        | 5        | 12       | 21       | 5        | 4        | 16       |
| <b>Jun.2020</b> | 13       | 26       | 10       | 6        | 15       | 0        | 2        | 1        | 14       | 3        | 20       | 2        | 14       | 7        | 7        | 13       | 14       | 5        | 5        | 7        |
| <b>Jul.2020</b> | 14       | 35       | 6        | 7        | 11       | 2        | 0        | 1        | 0        | 3        | 10       | 10       | 3        | 3        | 4        | 6        | 15       | 8        | 4        | 16       |
| <b>Aug.2020</b> | 15       | 39       | 8        | 11       | 30       | 0        | 6        | 1        | 0        | 2        | 21       | 5        | 5        | 3        | 3        | 12       | 21       | 7        | 0        | 8        |
| <b>Sep.2020</b> | 13       | 35       | 5        | 10       | 9        | 1        | 2        | 1        | 22       | 2        | 15       | 9        | 9        | 6        | 1        | 17       | 13       | 6        | 4        | 21       |
| <b>Oct.2020</b> | 6        | 43       | 8        | 8        | 21       | 0        | 3        | 1        | 0        | 3        | 22       | 8        | 6        | 9        | 1        | 10       | 19       | 7        | 3        | 1        |
| <b>Nov.2020</b> | 8        | 40       | 14       | 7        | 11       | 0        | 0        | 4        | 0        | 2        | 22       | 4        | 19       | 9        | 3        | 12       | 15       | 9        | 4        | 26       |
| <b>Dec.2020</b> | 3        | 49       | 9        | 15       | 14       | 0        | 3        | 1        | 17       | 1        | 8        | 4        | 16       | 9        | 0        | 37       | 22       | 9        | 3        | 6        |
| <b>Jan.2021</b> | 7        | 31       | 6        | 8        | 16       | 0        | 3        | 2        | 0        | 2        | 1        | 8        | 2        | 9        | 1        | 12       | 17       | 6        | 5        | 11       |
| <b>Feb.2021</b> | 9        | 37       | 6        | 6        | 4        | 0        | 3        | 4        | 0        | 5        | 1        | 3        | 4        | 9        | 0        | 6        | 17       | 8        | 5        | 13       |
| <b>Mar.2021</b> | 7        | 32       | 8        | 9        | 5        | 0        | 5        | 2        | 30       | 4        | 0        | 6        | 8        | 9        | 1        | 30       | 23       | 8        | 5        | 11       |
| <b>Apr.2021</b> | 5        | 48       | 9        | 15       | 26       | 0        | 13       | 3        | 0        | 2        | 3        | 6        | 3        | 9        | 4        | 9        | 22       | 11       | 3        | 17       |
| <b>May.2021</b> | 1        | 46       | 7        | 25       | 3        | 0        | 0        | 2        | 0        | 3        | 19       | 2        | 6        | 7        | 1        | 12       | 21       | 10       | 3        | 3        |
| <b>Jun.2021</b> | 8        | 30       | 8        | 20       | 8        | 0        | 7        | 1        | 16       | 2        | 15       | 9        | 10       | 7        | 2        | 5        | 18       | 12       | 1        | 7        |
| <b>Jul.2021</b> | 14       | 61       | 6        | 7        | 12       | 0        | 5        | 4        | 0        | 2        | 19       | 15       | 3        | 5        | 0        | 17       | 33       | 12       | 2        | 15       |

| Journals<br>Months | A        | B  | C  | D  | E  | F  | G | H | I  | J | K  | L  | M  | N | O | P  | Q  | R  | S  | T  |
|--------------------|----------|----|----|----|----|----|---|---|----|---|----|----|----|---|---|----|----|----|----|----|
|                    | Aug.2021 | 12 | 41 | 7  | 18 | 23 | 0 | 0 | 4  | 0 | 4  | 13 | 9  | 9 |   | 1  | 13 | 28 | 13 | 0  |
| Sep.2021           | 4        | 29 | 8  | 5  | 18 | 1  | 6 | 2 | 24 | 4 | 14 | 15 | 3  | 8 | 2 | 13 | 22 | 12 | 1  | 8  |
| Oct.2021           | 10       | 33 | 6  | 13 | 7  | 0  | 4 | 4 | 0  | 2 | 13 | 8  | 6  |   | 2 | 13 | 24 | 10 | 1  | 15 |
| Nov.2021           | 13       | 40 | 12 | 17 | 1  | 0  | 3 | 3 | 10 | 3 | 10 | 8  | 5  | 5 | 3 | 15 | 27 | 13 | 1  | 3  |
| Dec.2021           | 3        | 37 | 9  | 18 | 10 | 1  | 9 | 2 | 24 | 2 | 11 | 5  | 1  |   | 2 | 15 | 34 | 11 | 3  | 9  |
| Jan.2022           | 7        | 28 | 10 | 14 | 7  | 0  | 3 | 3 | 0  | 1 | 3  | 5  | 6  | 3 | 4 | 1  | 21 | 10 | 2  | 15 |
| Feb.2022           | 2        | 19 | 0  | 16 | 9  | 0  | 4 | 2 | 23 | 7 | 13 | 9  | 4  |   | 0 | 3  | 21 | 16 | 3  | 10 |
| Mar.2022           | 10       | 32 | 7  | 25 | 11 | 0  | 6 | 2 | 0  | 5 | 18 | 9  | 2  | 5 | 1 | 6  | 18 | 13 | 7  | 6  |
| Apr.2022           | 5        | 37 | 9  | 8  | 15 | 0  | 4 | 1 | 20 | 2 | 8  | 7  | 20 |   | 1 | 21 | 35 | 14 | 1  | 6  |
| May.2022           | 10       | 42 | 5  | 21 | 5  | 0  | 6 | 3 | 0  | 3 | 5  | 8  | 7  | 8 | 3 | 11 | 31 | 10 | 3  | 4  |
| Jun.2022           | 6        | 31 | 7  | 18 | 6  | 0  | 6 | 1 | 15 | 4 | 12 | 5  | 7  |   | 3 | 10 | 22 | 10 | 5  | 2  |

**Data source:** Websites of the included global health journals

**Note for full journal names:**

A=*Annals of Global Health*; B=*BMJ Global Health*; C=*Bulletin of the World Health Organization*; D=*Clinical Epidemiology and Global Health*; E=*Global Health Action*; F=*Global Health Epidemiology and Genomics*; G=*Global Health Promotion*; H=*Global Health Research and Policy*; I=*Global Health-Science and Practice*; J=*Global Mental Health*; K=*Global Public Health*; L=*Globalization and Health*; M=*International Health*; N=*International Journal of Health Sciences-IJHS*; O=*Journal of Epidemiology and Global Health*; P=*Journal of Global Health*; Q=*Lancet Global Health*; R=*Lancet Planetary Health*; S=*Pathogens and Global Health*; T=*Tropical Medicine & International Health*.

Table S22 Extracted raw data of all publications for ITSA

| Journals<br>Months | A        | B  | C  | D  | E  | F  | G  | H | I  | J | K  | L  | M  | N  | O  | P  | Q  | R  | S  | T  |
|--------------------|----------|----|----|----|----|----|----|---|----|---|----|----|----|----|----|----|----|----|----|----|
|                    | Jan.2018 | 0  | 24 | 10 | 6  | 15 | 2  | 3 | 3  | 0 | 4  | 14 | 14 | 11 | 15 | 0  | 4  | 27 | 10 | 4  |
| Feb.2018           | 0        | 20 | 11 | 6  | 8  | 1  | 0  | 3 | 0  | 5 | 8  | 8  | 28 | 1  |    | 9  | 23 | 11 | 8  | 9  |
| Mar.2018           | 0        | 19 | 12 | 11 | 18 | 0  | 2  | 3 | 18 | 2 | 14 | 11 | 13 | 16 | 0  | 7  | 30 | 13 | 7  | 10 |
| Apr.2018           | 24       | 31 | 9  | 3  | 5  | 3  | 5  | 2 | 0  | 5 | 9  | 10 | 7  |    | 0  | 5  | 20 | 9  | 3  | 12 |
| May.2018           | 0        | 19 | 10 | 8  | 9  | 3  | 7  | 3 | 0  | 4 | 13 | 11 | 9  | 15 | 1  | 5  | 25 | 12 | 3  | 19 |
| Jun.2018           | 0        | 20 | 11 | 7  | 10 | 4  | 3  | 3 | 18 | 2 | 1  | 7  | 3  |    | 0  | 16 | 17 | 9  | 3  | 15 |
| Jul.2018           | 11       | 15 | 8  | 9  | 10 | 0  | 2  | 3 | 0  | 3 | 5  | 16 | 15 | 15 | 0  | 10 | 26 | 11 | 4  | 7  |
| Aug.2018           | 26       | 11 | 11 | 10 | 13 | 2  | 1  | 3 | 0  | 2 | 16 | 14 | 7  |    | 0  | 3  | 27 | 9  | 3  | 12 |
| Sep.2018           | 1        | 23 | 12 | 7  | 8  | 0  | 1  | 3 | 0  | 2 | 7  | 2  | 8  | 15 | 0  | 16 | 40 | 11 | 3  | 3  |
| Oct.2018           | 4        | 51 | 9  | 6  | 13 | 3  | 4  | 3 | 26 | 5 | 6  | 6  | 8  |    | 0  | 14 | 27 | 10 | 5  | 27 |
| Nov.2018           | 26       | 26 | 9  | 9  | 15 | 0  | 3  | 3 | 0  | 4 | 10 | 20 | 12 | 10 | 0  | 12 | 9  | 12 | 5  | 10 |
| Dec.2018           | 0        | 24 | 10 | 9  | 3  | 1  | 5  | 4 | 16 | 3 | 3  | 3  | 7  |    | 38 | 17 | 20 | 10 | 4  | 13 |
| Jan.2019           | 15       | 29 | 8  | 9  | 15 | 0  | 1  | 3 | 0  | 2 | 6  | 9  | 10 | 10 | 1  | 9  | 24 | 13 | 1  | 12 |
| Feb.2019           | 3        | 24 | 13 | 13 | 8  | 0  | 0  | 3 | 0  | 0 | 14 | 9  | 5  |    | 0  | 13 | 34 | 16 | 3  | 13 |
| Mar.2019           | 30       | 18 | 10 | 13 | 4  | 2  | 2  | 4 | 26 | 0 | 10 | 8  | 9  | 10 | 4  | 9  | 34 | 16 | 6  | 10 |
| Apr.2019           | 14       | 29 | 9  | 13 | 8  | 1  | 20 | 2 | 0  | 2 | 6  | 5  | 6  |    | 0  | 16 | 21 | 9  | 4  | 7  |
| May.2019           | 11       | 24 | 10 | 9  | 18 | 1  | 0  | 4 | 0  | 5 | 10 | 3  | 8  | 10 | 5  | 5  | 38 | 11 | 4  | 8  |
| Jun.2019           | 16       | 27 | 10 | 6  | 9  | 0  | 3  | 3 | 15 | 2 | 15 | 7  | 5  |    | 8  | 24 | 26 | 11 | 2  | 8  |
| Jul.2019           | 19       | 42 | 8  | 11 | 13 | 0  | 3  | 2 | 0  | 4 | 8  | 8  | 17 | 10 | 3  | 11 | 25 | 10 | 1  | 11 |
| Aug.2019           | 6        | 46 | 10 | 18 | 4  | 0  | 6  | 4 | 13 | 4 | 16 | 1  | 2  |    | 4  | 6  | 33 | 7  | 3  | 12 |
| Sep.2019           | 3        | 42 | 9  | 12 | 12 | 3  | 1  | 3 | 13 | 0 | 9  | 4  | 0  | 7  | 5  | 4  | 27 | 5  | 2  | 5  |

| Journals<br>Months | A        | B  | C  | D  | E  | F  | G  | H | I  | J | K  | L  | M  | N  | O  | P  | Q  | R  | S  | T  |
|--------------------|----------|----|----|----|----|----|----|---|----|---|----|----|----|----|----|----|----|----|----|----|
|                    | Oct.2019 | 8  | 31 | 13 | 15 | 12 | 0  | 1 | 3  | 0 | 7  | 15 | 2  | 18 |    | 8  | 28 | 35 | 8  | 4  |
| Nov.2019           | 9        | 36 | 7  | 11 | 12 | 1  | 3  | 4 | 0  | 0 | 4  | 19 | 12 | 8  | 6  | 11 | 29 | 7  | 3  | 28 |
| Dec.2019           | 11       | 28 | 12 | 16 | 3  | 0  | 11 | 3 | 13 | 1 | 12 | 12 | 8  |    | 6  | 18 | 39 | 8  | 6  | 13 |
| Jan.2020           | 7        | 25 | 10 | 29 | 10 | 0  | 0  | 2 | 0  | 4 | 18 | 12 | 12 | 7  | 9  | 4  | 23 | 8  | 12 | 12 |
| Feb.2020           | 18       | 25 | 12 | 27 | 6  | 1  | 0  | 3 | 0  | 2 | 11 | 4  | 7  |    | 8  | 18 | 26 | 7  | 6  | 7  |
| Mar.2020           | 9        | 30 | 15 | 27 | 17 | 0  | 3  | 7 | 11 | 2 | 8  | 10 | 8  | 8  | 1  | 32 | 34 | 8  | 6  | 12 |
| Apr.2020           | 13       | 38 | 17 | 26 | 4  | 1  | 1  | 4 | 0  | 0 | 15 | 9  | 7  |    | 8  | 43 | 43 | 11 | 8  | 11 |
| May.2020           | 7        | 47 | 12 | 22 | 5  | 0  | 5  | 8 | 0  | 5 | 19 | 11 | 1  | 10 | 6  | 24 | 32 | 10 | 7  | 16 |
| Jun.2020           | 15       | 37 | 11 | 11 | 15 | 0  | 2  | 4 | 18 | 3 | 24 | 4  | 14 |    | 7  | 34 | 22 | 9  | 11 | 7  |
| Jul.2020           | 17       | 51 | 9  | 11 | 11 | 2  | 0  | 4 | 0  | 3 | 14 | 16 | 5  | 4  | 6  | 25 | 30 | 11 | 5  | 16 |
| Aug.2020           | 19       | 49 | 10 | 17 | 33 | 0  | 6  | 3 | 0  | 3 | 27 | 7  | 6  |    | 12 | 48 | 33 | 11 | 3  | 9  |
| Sep.2020           | 16       | 49 | 9  | 14 | 10 | 1  | 2  | 4 | 24 | 3 | 17 | 15 | 9  | 8  | 6  | 36 | 21 | 12 | 7  | 22 |
| Oct.2020           | 12       | 51 | 12 | 10 | 22 | 0  | 4  | 3 | 0  | 3 | 26 | 15 | 9  |    | 4  | 24 | 25 | 12 | 4  | 3  |
| Nov.2020           | 11       | 48 | 15 | 8  | 12 | 1  | 2  | 5 | 0  | 3 | 23 | 7  | 20 | 9  | 5  | 18 | 20 | 10 | 8  | 27 |
| Dec.2020           | 3        | 57 | 11 | 18 | 14 | 0  | 5  | 4 | 19 | 2 | 12 | 6  | 16 |    | 2  | 45 | 30 | 11 | 5  | 8  |
| Jan.2021           | 11       | 45 | 10 | 13 | 18 | 0  | 7  | 3 | 0  | 2 | 4  | 16 | 3  | 9  | 5  | 35 | 24 | 11 | 11 | 11 |
| Feb.2021           | 12       | 48 | 12 | 9  | 5  | 0  | 10 | 4 | 0  | 5 | 5  | 6  | 7  |    | 1  | 13 | 23 | 9  | 12 | 14 |
| Mar.2021           | 9        | 52 | 10 | 12 | 5  | 0  | 9  | 4 | 32 | 4 | 10 | 13 | 9  | 9  | 6  | 48 | 38 | 10 | 12 | 11 |
| Apr.2021           | 9        | 58 | 11 | 21 | 29 | 0  | 15 | 4 | 0  | 5 | 16 | 16 | 5  |    | 6  | 24 | 26 | 13 | 4  | 17 |
| May.2021           | 3        | 63 | 12 | 34 | 5  | 0  | 1  | 4 | 0  | 4 | 21 | 7  | 10 | 7  | 2  | 19 | 25 | 12 | 5  | 3  |
| Jun.2021           | 11       | 45 | 14 | 30 | 8  | 0  | 10 | 1 | 21 | 4 | 21 | 10 | 11 |    | 8  | 12 | 25 | 13 | 4  | 8  |
| Jul.2021           | 17       | 77 | 9  | 11 | 12 | 0  | 6  | 6 | 0  | 3 | 21 | 17 | 4  | 7  | 0  | 35 | 39 | 14 | 6  | 15 |

| Journals<br>Months | A  | B  | C  | D  | E  | F | G  | H | I  | J  | K  | L  | M  | N | O  | P  | Q  | R  | S | T  |
|--------------------|----|----|----|----|----|---|----|---|----|----|----|----|----|---|----|----|----|----|---|----|
| Aug.2021           | 13 | 57 | 9  | 25 | 23 | 0 | 0  | 5 | 0  | 5  | 14 | 11 | 11 |   | 3  | 18 | 33 | 14 | 1 | 10 |
| Sep.2021           | 6  | 41 | 10 | 8  | 18 | 1 | 10 | 6 | 25 | 4  | 17 | 17 | 5  | 8 | 3  | 19 | 26 | 12 | 1 | 8  |
| Oct.2021           | 11 | 39 | 10 | 20 | 7  | 0 | 5  | 4 | 0  | 2  | 15 | 10 | 8  |   | 3  | 16 | 29 | 14 | 1 | 16 |
| Nov.2021           | 17 | 49 | 13 | 26 | 2  | 0 | 3  | 3 | 10 | 3  | 11 | 9  | 6  | 7 | 6  | 23 | 36 | 15 | 3 | 3  |
| Dec.2021           | 5  | 52 | 12 | 27 | 10 | 1 | 9  | 5 | 27 | 3  | 12 | 6  | 3  |   | 5  | 28 | 40 | 13 | 3 | 10 |
| Jan.2022           | 9  | 36 | 11 | 21 | 8  | 0 | 4  | 4 | 0  | 2  | 4  | 8  | 6  | 7 | 10 | 1  | 23 | 10 | 4 | 16 |
| Feb.2022           | 4  | 31 | 13 | 22 | 9  | 0 | 4  | 2 | 26 | 10 | 13 | 17 | 4  |   | 0  | 9  | 23 | 17 | 7 | 11 |
| Mar.2022           | 11 | 43 | 8  | 32 | 11 | 0 | 8  | 3 | 0  | 9  | 19 | 11 | 4  | 7 | 2  | 12 | 25 | 14 | 7 | 9  |
| Apr.2022           | 5  | 44 | 10 | 11 | 15 | 1 | 4  | 3 | 22 | 2  | 8  | 9  | 21 |   | 5  | 26 | 38 | 14 | 2 | 7  |
| May.2022           | 12 | 51 | 7  | 26 | 5  | 2 | 7  | 4 | 0  | 4  | 6  | 8  | 8  | 9 | 4  | 24 | 34 | 12 | 3 | 5  |
| Jun.2022           | 7  | 47 | 8  | 21 | 8  | 0 | 8  | 3 | 16 | 5  | 7  | 12 | 8  |   | 4  | 13 | 26 | 11 | 6 | 2  |

**Data source:** Websites of the included global health journals

**Note for full journal names:**

A=*Annals of Global Health*; B=*BMJ Global Health*; C=*Bulletin of the World Health Organization*; D=*Clinical Epidemiology and Global Health*; E=*Global Health Action*; F=*Global Health Epidemiology and Genomics*; G=*Global Health Promotion*; H=*Global Health Research and Policy*; I=*Global Health-Science and Practice*; J=*Global Mental Health*; K=*Global Public Health*; L=*Globalization and Health*; M=*International Health*; N=*International Journal of Health Sciences-IJHS*; O=*Journal of Epidemiology and Global Health*; P=*Journal of Global Health*; Q=*Lancet Global Health*; R=*Lancet Planetary Health*; S=*Pathogens and Global Health*; T=*Tropical Medicine & International Health*.
