# Supplementary material for: The impact of COVID-19 on global health journals: an analysis of impact factor and publication trends
Source: HighWire-hosted journal article supplement (doi:10.1136/bmjgh-2022-011514), 2023-04-01
Supplement: bmjgh-2022-011514supp003_data_supplement.pdf [file bmjgh-2022-011514supp003_data_supplement.pdf]

### Appendix 3: Supplementary results

Table S1 (Pages 1-2): Characteristics of the included global health journals

Table S2 (Pages 3-4): Changes of non-COVID-19 publications with ITSA analysis due to the pandemic from January 2018 to June 2022 in the included global health journals using Newey-West test

Figure S1 (Pages 5-7): Auto correlation plots with Cumby-Huizinga general test (up to lag order=6) for non-COVID-19 publications in the included global health journals (Figure S1 includes A-T)

**Table S1 Characteristics of the included global health journals**

| Journal name                                 | First year issued | Edition   | Frequency (issues per year) | Country / Region | First electronic JCR year | h-index (2021) | JCI (2021) | Total citations (2021) | APC <sup>a</sup>     | Overall hot papers <sup>d</sup> | COVID-19-related hot papers | Overall highly cited papers <sup>e</sup> |                                    |
|----------------------------------------------|-------------------|-----------|-----------------------------|------------------|---------------------------|----------------|------------|------------------------|----------------------|---------------------------------|-----------------------------|------------------------------------------|------------------------------------|
|                                              |                   |           |                             |                  |                           |                |            |                        |                      |                                 |                             | COVID-19-related highly cited papers     | From January 2020 to June 2022 (N) |
| Annals of Global Health                      | 2014              | SCIE      | 1                           | ENGLAND          | 2014                      | 7              | 0.60       | 2312                   | 1365 dollars         | 0                               | 0                           | 0                                        | 0                                  |
| BMJ Global Health                            | 2016              | SSCI/SCIE | 6                           | ENGLAND          | 2019                      | 21             | 1.58       | 9641                   | 3000 pounds          | 2                               | 2                           | 20                                       | 16                                 |
| Bulletin of the World Health Organization    | 1947              | SCIE      | 12                          | SWITZERLAND      | 1997                      | 12             | 2.23       | 21791                  | No APC               | 1                               | 1                           | 8                                        | 5                                  |
| Clinical Epidemiology and Global Health      | 2013              | ESCI      | 3                           | INDIA            | 2020                      | 18             | 0.51       | 1384                   | 1200 dollars         | 0                               | 0                           | 0                                        | 0                                  |
| Global Health Action                         | 2008              | SSCI/SCIE | 1                           | ENGLAND          | 2011                      | 8              | 0.78       | 5288                   | 1582 dollars         | 0                               | 0                           | 1                                        | 1                                  |
| Global Health Epidemiology and Genomics      | 2016              | ESCI      | 1                           | ENGLAND          | 2020                      | 0              | 0.41       | 250                    | 1350 dollars         | 0                               | 0                           | 0                                        | 0                                  |
| Global Health Promotion                      | 1994              | SSCI      | 4                           | USA              | 2012                      | 5              | 0.46       | 974                    | - <sup>c</sup>       | 0                               | 0                           | 0                                        | 0                                  |
| Global Health Research and Policy            | 2016              | ESCI      | 1                           | CHINA MAINLAND   | 2020                      | 5              | 1.48       | 862                    | Covered <sup>b</sup> | 0                               | 0                           | 0                                        | 0                                  |
| Global Health-Science and Practice           | 2013              | SSCI/SCIE | 4                           | USA              | 2019                      | 7              | 0.73       | 1717                   | No APC               | 0                               | 0                           | 0                                        | 0                                  |
| Global Mental Health                         | 2014              | SCIE      | 1                           | ENGLAND          | 2019                      | 6              | 0.75       | 736                    | 3255 dollars         | 0                               | 0                           | 0                                        | 0                                  |
| Global Public Health                         | 2006              | SSCI      | 10                          | ENGLAND          | 2011                      | 11             | 0.82       | 3612                   | 2575 dollars         | 0                               | 0                           | 6                                        | 6                                  |
| Globalization and Health                     | 2005              | SSCI/SCIE | 1                           | ENGLAND          | 2011                      | 18             | 1.61       | 5196                   | 2890 dollars         | 2                               | 2                           | 18                                       | 15                                 |
| International Health                         | 2009              | SSCI/SCIE | 6                           | ENGLAND          | 2012                      | 8              | 0.59       | 1741                   | 2000 pounds          | 0                               | 0                           | 1                                        | 1                                  |
| International Journal of Health Science-IJHS | 2007              | ESCI      | 6                           | SAUDI ARABIA     | 2020                      | 4              | 0.42       | 1178                   | 30 dollars           | 0                               | 0                           | 0                                        | 0                                  |

| Journal name                              | First year issued | Edition   | Frequency (issues per year) | Country / Region | First electronic JCR year | h-index (2021) | JCI (2021) | Total citations (2021) | APC <sup>a</sup> | From January 2020 to June 2022 (N) |                             |                                          |                                      |
|-------------------------------------------|-------------------|-----------|-----------------------------|------------------|---------------------------|----------------|------------|------------------------|------------------|------------------------------------|-----------------------------|------------------------------------------|--------------------------------------|
|                                           |                   |           |                             |                  |                           |                |            |                        |                  | Overall hot papers <sup>d</sup>    | COVID-19-related hot papers | Overall highly cited papers <sup>e</sup> | COVID-19-related highly cited papers |
| Journal of Epidemiology and Global Health | 2011              | SSCI/SCIE | 4                           | FRANCE           | 2019                      | 9              | 0.88       | 1484                   | 2290 dollars     | 0                                  | 0                           | 2                                        | 1                                    |
| Journal of Global Health                  | 2011              | SSCI/SCIE | 2                           | SCOTLAND         | 2015                      | 15             | 1.11       | 4452                   | 1950 pounds      | 0                                  | 0                           | 11                                       | 9                                    |
| Lancet Global Health                      | 2013              | SSCI/SCIE | 12                          | ENGLAND          | 2013                      | 27             | 8.34       | 22156                  | 5500 dollars     | 6                                  | 2                           | 39                                       | 21                                   |
| Lancet Planetary Health                   | 2017              | SSCI/SCIE | 12                          | ENGLAND          | 2020                      | 23             | 4.00       | 4794                   | 5500 dollars     | 0                                  | 0                           | 12                                       | 2                                    |
| Pathogens and Global Health               | 1907              | SCIE      | 8                           | ENGLAND          | 2012                      | 8              | 0.91       | 1943                   | No APC           | 0                                  | 0                           | 2                                        | 2                                    |
| Tropical Medicine & International Health  | 1996              | SCIE      | 12                          | ENGLAND          | 1997                      | 8              | 0.70       | 9448                   | 3150 dollars     | 0                                  | 0                           | 0                                        | 0                                    |

**Note:**

<sup>a</sup> APC is only charged for research or original articles in global health journals.

<sup>b</sup> APC covered by the Global Health Institute, Wuhan University, China before June 30, 2022.

<sup>c</sup> Information about APC in Global Health Promotion could not be found in the official website.

<sup>d</sup> Papers cited in the top 0.1% in a current bimonthly period. Papers are selected in each of 22 fields of science and must be published within the last two years (quoted from Clarivate).

<sup>e</sup> Highly cited papers reflect the top 1% of papers by field and publication year (quoted from Clarivate).

**Table S2 Changes of non-COVID-19 publications with ITSA analysis due to the pandemic from January 2018 to June 2022 in the included global health journals using Newey-West test**

| Journal name                                  | Coefficient values        | Newey-West Standard error | t    | P     | 95% Confidence interval |                |
|-----------------------------------------------|---------------------------|---------------------------|------|-------|-------------------------|----------------|
| Total                                         | _t <sup>a</sup>           | 1.83                      | 0.3  | 6.16  | <0.001*                 | [1.24, 2.43]   |
|                                               | _xFeb.2020 <sup>b</sup>   | -14.2                     | 5.52 | -2.58 | 0.013*                  | [-25.3, -3.1]  |
|                                               | _x_tFeb.2020 <sup>c</sup> | -2.47                     | 0.50 | -4.92 | <0.001*                 | [-3.47, -1.46] |
|                                               | _cons <sup>d</sup>        | 153.3                     | 3.9  | 39.54 | <0.001*                 | [145.5, 161.1] |
| Annals of Global Health                       | _t                        | 0.23                      | 0.21 | 1.09  | 0.281                   | [-0.19, 0.65]  |
|                                               | _xFeb.2020                | -1.3                      | 3.8  | -0.33 | 0.743                   | [-8.9, 6.4]    |
|                                               | _x_tFeb.2020              | -0.43                     | 0.20 | -2.16 | 0.036*                  | [-0.83, -0.03] |
|                                               | _cons                     | 7.0                       | 2.7  | 2.59  | 0.013*                  | [1.6, 12.5]    |
| BMJ Global Health                             | _t                        | 0.62                      | 0.20 | 3.02  | 0.004*                  | [0.21, 1.02]   |
|                                               | _xFeb.2020                | -0.3                      | 4.1  | -0.06 | 0.949                   | [-8.5, 7.9]    |
|                                               | _x_tFeb.2020              | -0.56                     | 0.26 | -2.14 | 0.037*                  | [-1.08, -0.04] |
|                                               | _cons                     | 20.0                      | 2.9  | 6.81  | <0.001*                 | [14.1, 25.9]   |
| Bulletin of the World Health Organization     | _t                        | -0.02                     | 0.05 | -0.44 | 0.660                   | [-0.11, 0.07]  |
|                                               | _xFeb.2020                | 0.9                       | 1.3  | 0.70  | 0.489                   | [-1.7, 3.6]    |
|                                               | _x_tFeb.2020              | -0.15                     | 0.08 | -1.87 | 0.067                   | [-0.31, 0.01]  |
|                                               | _cons                     | 10.3                      | 0.5  | 19.73 | <0.001*                 | [9.2, 11.3]    |
| Clinical Epidemiology and Global Health       | _t                        | 0.49                      | 0.14 | 3.50  | 0.001*                  | [0.21, 0.77]   |
|                                               | _xFeb.2020                | -2.0                      | 4.5  | -0.45 | 0.658                   | [-11.0, 7.0]   |
|                                               | _x_tFeb.2020              | -0.51                     | 0.28 | -1.83 | 0.074                   | [-1.06, 0.05]  |
|                                               | _cons                     | 4.8                       | 1.3  | 3.80  | <0.001*                 | [2.2, 7.3]     |
| Global Health Action                          | _t                        | -0.01                     | 0.12 | -0.82 | 0.417                   | [-0.33, 0.14]  |
|                                               | _xFeb.2020                | 4.4                       | 3.2  | 1.35  | 0.183                   | [-2.1, 10.9]   |
|                                               | _x_tFeb.2020              | -0.05                     | 0.18 | -0.26 | 0.798                   | [-0.41, 0.32]  |
|                                               | _cons                     | 11.3                      | 1.7  | 6.86  | <0.001*                 | [8.0, 14.7]    |
| Global Health Epidemiology and Genomics       | _t                        | -0.07                     | 0.03 | -2.73 | 0.009*                  | [-0.11, -0.02] |
|                                               | _xFeb.2020                | 0.3                       | 0.4  | 0.72  | 0.477                   | [-0.5, 1.0]    |
|                                               | _x_tFeb.2020              | 0.06                      | 0.03 | 2.12  | 0.039*                  | [0.00, 0.11]   |
|                                               | _cons                     | 1.9                       | 0.4  | 4.64  | <0.001*                 | [1.1, 2.7]     |
| Global Health Promotion                       | _t                        | 0.07                      | 0.08 | 0.78  | 0.440                   | [-0.10, 0.23]  |
|                                               | _xFeb.2020                | -2.4                      | 1.6  | -1.49 | 0.143                   | [-5.7, 0.8]    |
|                                               | _x_tFeb.2020              | 0.07                      | 0.09 | 0.79  | 0.431                   | [-0.11, 0.26]  |
|                                               | _cons                     | 2.7                       | 1.0  | 2.72  | 0.009*                  | [0.7, 4.7]     |
| Global Health Research and Policy             | _t                        | 0.01                      | 0.01 | 0.65  | 0.520                   | [-0.02, 0.03]  |
|                                               | _xFeb.2020                | -0.8                      | 0.7  | -1.16 | 0.253                   | [-2.1, 0.6]    |
|                                               | _x_tFeb.2020              | -0.01                     | 0.03 | -0.37 | 0.713                   | [-0.07, 0.05]  |
|                                               | _cons                     | 2.9                       | 0.1  | 20.56 | <0.001*                 | [2.7, 3.2]     |
| International Journal of Health Sciences-IJHS | _t                        | -0.41                     | 0.04 | -9.41 | <0.001*                 | [-0.50, -0.32] |
|                                               | _xFeb.2020                | 0.8                       | 1.1  | 0.74  | 0.467                   | [-1.5, 3.1]    |
|                                               | _x_tFeb.2020              | 0.36                      | 0.07 | 5.03  | <0.001*                 | [0.21, 0.51]   |
|                                               | _cons                     | 16.2                      | 0.7  | 24.66 | <0.001*                 | [14.9, 17.6]   |
| Global Mental Health                          | _t                        | -0.05                     | 0.05 | -0.94 | 0.352                   | [-0.16, 0.06]  |
|                                               | _xFeb.2020                | -0.1                      | 1.1  | -0.10 | 0.924                   | [-2.3, 2.1]    |
|                                               | _x_tFeb.2020              | 0.10                      | 0.06 | 1.59  | 0.118                   | [-0.03, 0.23]  |
|                                               | _cons                     | 3.5                       | 0.6  | 6.25  | <0.001*                 | [2.4, 4.6]     |
| Global Public Health                          | _t                        | 0.12                      | 0.10 | 1.16  | 0.253                   | [-0.09, 0.33]  |
|                                               | _xFeb.2020                | 2.3                       | 2.9  | 0.80  | 0.430                   | [-3.5, 8.2]    |
|                                               | _x_tFeb.2020              | -0.26                     | 0.14 | -1.91 | 0.062                   | [-0.53, 0.01]  |
|                                               | _cons                     | 8.5                       | 1.6  | 5.22  | <0.001*                 | [5.2, 11.8]    |

| Journal name                              | Coefficient values | Newey-West Standard error | t    | P     | 95% Confidence interval |                |
|-------------------------------------------|--------------------|---------------------------|------|-------|-------------------------|----------------|
| Globalization and Health                  | _t                 | -0.13                     | 0.14 | -0.92 | 0.364                   | [-0.42, 0.16]  |
|                                           | _xFeb.2020         | -0.6                      | 2.6  | -0.22 | 0.828                   | [-5.9, 4.7]    |
|                                           | _x_tFeb.2020       | 0.18                      | 0.15 | 1.16  | 0.252                   | [-0.13, 0.49]  |
|                                           | _cons              | 10.4                      | 1.7  | 6.27  | <0.001*                 | [7.1, 13.7]    |
| International Health                      | _t                 | -0.16                     | 0.20 | -0.82 | 0.417                   | [-0.56, 0.24]  |
|                                           | _xFeb.2020         | -0.1                      | 3.1  | -0.02 | 0.985                   | [-6.4, 6.3]    |
|                                           | _x_tFeb.2020       | 0.13                      | 0.23 | 0.55  | 0.585                   | [-0.33, 0.58]  |
|                                           | _cons              | 11.5                      | 2.8  | 4.09  | <0.001*                 | [5.9, 17.2]    |
| Journal of Epidemiology and Global Health | _t                 | 0.31                      | 0.05 | 6.24  | <0.001*                 | [0.21, 0.41]   |
|                                           | _xFeb.2020         | -4.2                      | 1.6  | -2.60 | 0.012*                  | [-7.4, -1.0]   |
|                                           | _x_tFeb.2020       | -0.41                     | 0.07 | -5.86 | <0.001*                 | [-0.55, -0.27] |
|                                           | _cons              | 0.2                       | 1.9  | 0.13  | 0.898                   | [-3.5, 4.0]    |
| Journal of Global Health                  | _t                 | 0.25                      | 0.19 | 1.35  | 0.184                   | [-0.12, 0.63]  |
|                                           | _xFeb.2020         | 4.8                       | 4.6  | 1.05  | 0.298                   | [-4.4, 13.9]   |
|                                           | _x_tFeb.2020       | -0.62                     | 0.25 | -2.46 | 0.017*                  | [-1.12, -0.11] |
|                                           | _cons              | 8.0                       | 1.9  | 4.31  | <0.001*                 | [4.3, 11.7]    |
| Lancet Global Health                      | _t                 | 0.31                      | 0.16 | 2.00  | 0.051                   | [-0.00, 0.63]  |
|                                           | _xFeb.2020         | -13.2                     | 3.2  | -4.16 | <0.001*                 | [-19.5, -6.8]  |
|                                           | _x_tFeb.2020       | -0.01                     | 0.20 | -0.06 | 0.952                   | [-0.42, 0.40]  |
|                                           | _cons              | 23.4                      | 2.3  | 10.06 | <0.001*                 | [18.7, 28.1]   |
| Lancet Planetary Health                   | _t                 | -0.14                     | 0.05 | -2.82 | 0.007*                  | [-0.24, -0.04] |
|                                           | _xFeb.2020         | -2.5                      | 1.1  | -2.23 | 0.030*                  | [-4.8, -0.3]   |
|                                           | _x_tFeb.2020       | 0.40                      | 0.07 | 5.73  | <0.001*                 | [0.26, 0.54]   |
|                                           | _cons              | 11.9                      | 0.7  | 17.72 | <0.001*                 | [10.6, 13.3]   |
| Pathogens and Global Health               | _t                 | 0.01                      | 0.09 | 0.12  | 0.908                   | [-0.17, 0.20]  |
|                                           | _xFeb.2020         | 0.2                       | 1.3  | 0.18  | 0.859                   | [-2.3, 2.8]    |
|                                           | _x_tFeb.2020       | -0.10                     | 0.12 | -0.78 | 0.436                   | [-0.34, 0.15]  |
|                                           | _cons              | 4.0                       | 1.0  | 4.08  | <0.001*                 | [2.0, 6.0]     |
| Tropical Medicine & International Health  | _t                 | 0.09                      | 0.16 | 0.53  | 0.595                   | [-0.24, 0.41]  |
|                                           | _xFeb.2020         | 0.1                       | 3.0  | 0.03  | 0.974                   | [-5.9, 6.1]    |
|                                           | _x_tFeb.2020       | -0.30                     | 0.19 | -1.59 | 0.119                   | [-0.67, 0.08]  |
|                                           | _cons              | 10.8                      | 1.9  | 5.79  | <0.001*                 | [7.1, 14.6]    |

**\*Note:**

<sup>a</sup> \_t means the differences of the slopes before the pandemic.

<sup>b</sup> \_xFeb.2020 indicates the differences of the non-COVID-19 publications at the intervention time point, that is, the pandemic.

<sup>c</sup> \_x\_tFeb.2020 indicates the differences of the slopes between before and after the pandemic.

<sup>d</sup> \_cons means the constant values, that is, the number of non-COVID-19 publications in January 2018.

## A All the included global health journals

Cumby-Huizinga test for autocorrelation (Breusch-Godfrey)  
 H0: variable is MA process up to order q  
 HA: serial correlation present at specified lags >q

| H0: q=0 (serially uncorrelated)<br>HA: s.c. present at range specified |        |    |        | H0: q=specified lag-1<br>HA: s.c. present at lag specified |       |    |        |
|------------------------------------------------------------------------|--------|----|--------|------------------------------------------------------------|-------|----|--------|
| lags                                                                   | chi2   | df | p-val  | lag                                                        | chi2  | df | p-val  |
| 1 - 1                                                                  | 1.060  | 1  | 0.3032 | 1                                                          | 1.060 | 1  | 0.3032 |
| 1 - 2                                                                  | 9.129  | 2  | 0.0104 | 2                                                          | 6.817 | 1  | 0.0090 |
| 1 - 3                                                                  | 9.133  | 3  | 0.0276 | 3                                                          | 0.562 | 1  | 0.4535 |
| 1 - 4                                                                  | 9.137  | 4  | 0.0578 | 4                                                          | 0.776 | 1  | 0.3782 |
| 1 - 5                                                                  | 10.406 | 5  | 0.0645 | 5                                                          | 0.268 | 1  | 0.6046 |
| 1 - 6                                                                  | 20.231 | 6  | 0.0025 | 6                                                          | 9.900 | 1  | 0.0017 |

Test allows predetermined regressors/instruments  
 Test requires conditional homoskedasticity

## D Bulletin of the World Health Organization

Cumby-Huizinga test for autocorrelation (Breusch-Godfrey)  
 H0: variable is MA process up to order q  
 HA: serial correlation present at specified lags >q

| H0: q=0 (serially uncorrelated)<br>HA: s.c. present at range specified |       |    |        | H0: q=specified lag-1<br>HA: s.c. present at lag specified |       |    |        |
|------------------------------------------------------------------------|-------|----|--------|------------------------------------------------------------|-------|----|--------|
| lags                                                                   | chi2  | df | p-val  | lag                                                        | chi2  | df | p-val  |
| 1 - 1                                                                  | 0.010 | 1  | 0.9220 | 1                                                          | 0.010 | 1  | 0.9220 |
| 1 - 2                                                                  | 0.176 | 2  | 0.9159 | 2                                                          | 0.165 | 1  | 0.6843 |
| 1 - 3                                                                  | 1.438 | 3  | 0.6967 | 3                                                          | 1.242 | 1  | 0.2650 |
| 1 - 4                                                                  | 2.019 | 4  | 0.7323 | 4                                                          | 0.433 | 1  | 0.5105 |
| 1 - 5                                                                  | 2.207 | 5  | 0.8199 | 5                                                          | 0.101 | 1  | 0.7509 |
| 1 - 6                                                                  | 2.235 | 6  | 0.8968 | 6                                                          | 0.018 | 1  | 0.8947 |

Test allows predetermined regressors/instruments  
 Test requires conditional homoskedasticity

## G Global Health Promotion

Cumby-Huizinga test for autocorrelation (Breusch-Godfrey)  
 H0: variable is MA process up to order q  
 HA: serial correlation present at specified lags >q

| H0: q=0 (serially uncorrelated)<br>HA: s.c. present at range specified |        |    |        | H0: q=specified lag-1<br>HA: s.c. present at lag specified |       |    |        |
|------------------------------------------------------------------------|--------|----|--------|------------------------------------------------------------|-------|----|--------|
| lags                                                                   | chi2   | df | p-val  | lag                                                        | chi2  | df | p-val  |
| 1 - 1                                                                  | 2.865  | 1  | 0.0905 | 1                                                          | 2.865 | 1  | 0.0905 |
| 1 - 2                                                                  | 3.096  | 2  | 0.2126 | 2                                                          | 0.672 | 1  | 0.4125 |
| 1 - 3                                                                  | 10.118 | 3  | 0.0176 | 3                                                          | 7.296 | 1  | 0.0069 |
| 1 - 4                                                                  | 11.247 | 4  | 0.0239 | 4                                                          | 0.032 | 1  | 0.8574 |
| 1 - 5                                                                  | 12.462 | 5  | 0.0290 | 5                                                          | 0.549 | 1  | 0.4589 |
| 1 - 6                                                                  | 12.482 | 6  | 0.0520 | 6                                                          | 0.302 | 1  | 0.5824 |

Test allows predetermined regressors/instruments  
 Test requires conditional homoskedasticity

## B Annals of Global Health

Cumby-Huizinga test for autocorrelation (Breusch-Godfrey)  
 H0: variable is MA process up to order q  
 HA: serial correlation present at specified lags >q

| H0: q=0 (serially uncorrelated)<br>HA: s.c. present at range specified |        |    |        | H0: q=specified lag-1<br>HA: s.c. present at lag specified |       |    |        |
|------------------------------------------------------------------------|--------|----|--------|------------------------------------------------------------|-------|----|--------|
| lags                                                                   | chi2   | df | p-val  | lag                                                        | chi2  | df | p-val  |
| 1 - 1                                                                  | 1.942  | 1  | 0.1635 | 1                                                          | 1.942 | 1  | 0.1635 |
| 1 - 2                                                                  | 2.997  | 2  | 0.2235 | 2                                                          | 0.504 | 1  | 0.4779 |
| 1 - 3                                                                  | 3.267  | 3  | 0.3522 | 3                                                          | 0.014 | 1  | 0.9044 |
| 1 - 4                                                                  | 8.004  | 4  | 0.0914 | 4                                                          | 5.105 | 1  | 0.0239 |
| 1 - 5                                                                  | 8.158  | 5  | 0.1478 | 5                                                          | 1.318 | 1  | 0.2509 |
| 1 - 6                                                                  | 14.575 | 6  | 0.0238 | 6                                                          | 4.212 | 1  | 0.0401 |

Test allows predetermined regressors/instruments  
 Test requires conditional homoskedasticity

## E Clinical Epidemiology and Global Health

Cumby-Huizinga test for autocorrelation (Breusch-Godfrey)  
 H0: variable is MA process up to order q  
 HA: serial correlation present at specified lags >q

| H0: q=0 (serially uncorrelated)<br>HA: s.c. present at range specified |       |    |        | H0: q=specified lag-1<br>HA: s.c. present at lag specified |       |    |        |
|------------------------------------------------------------------------|-------|----|--------|------------------------------------------------------------|-------|----|--------|
| lags                                                                   | chi2  | df | p-val  | lag                                                        | chi2  | df | p-val  |
| 1 - 1                                                                  | 8.158 | 1  | 0.0043 | 1                                                          | 8.158 | 1  | 0.0043 |
| 1 - 2                                                                  | 8.359 | 2  | 0.0153 | 2                                                          | 1.566 | 1  | 0.2108 |
| 1 - 3                                                                  | 8.524 | 3  | 0.0363 | 3                                                          | 0.075 | 1  | 0.7841 |
| 1 - 4                                                                  | 9.257 | 4  | 0.0550 | 4                                                          | 0.578 | 1  | 0.4473 |
| 1 - 5                                                                  | 9.264 | 5  | 0.0990 | 5                                                          | 0.615 | 1  | 0.4329 |
| 1 - 6                                                                  | 9.413 | 6  | 0.1517 | 6                                                          | 0.781 | 1  | 0.3769 |

Test allows predetermined regressors/instruments  
 Test requires conditional homoskedasticity

## H Global Health Promotion

Cumby-Huizinga test for autocorrelation (Breusch-Godfrey)  
 H0: variable is MA process up to order q  
 HA: serial correlation present at specified lags >q

| H0: q=0 (serially uncorrelated)<br>HA: s.c. present at range specified |       |    |        | H0: q=specified lag-1<br>HA: s.c. present at lag specified |       |    |        |
|------------------------------------------------------------------------|-------|----|--------|------------------------------------------------------------|-------|----|--------|
| lags                                                                   | chi2  | df | p-val  | lag                                                        | chi2  | df | p-val  |
| 1 - 1                                                                  | 3.423 | 1  | 0.0643 | 1                                                          | 3.423 | 1  | 0.0643 |
| 1 - 2                                                                  | 6.497 | 2  | 0.0388 | 2                                                          | 1.374 | 1  | 0.2412 |
| 1 - 3                                                                  | 7.686 | 3  | 0.0530 | 3                                                          | 0.028 | 1  | 0.8665 |
| 1 - 4                                                                  | 8.197 | 4  | 0.0846 | 4                                                          | 0.003 | 1  | 0.9530 |
| 1 - 5                                                                  | 8.886 | 5  | 0.1137 | 5                                                          | 0.064 | 1  | 0.8003 |
| 1 - 6                                                                  | 9.219 | 6  | 0.1616 | 6                                                          | 0.002 | 1  | 0.9655 |

Test allows predetermined regressors/instruments  
 Test requires conditional homoskedasticity

## C BMJ Global Health

Cumby-Huizinga test for autocorrelation (Breusch-Godfrey)  
 H0: variable is MA process up to order q  
 HA: serial correlation present at specified lags >q

| H0: q=0 (serially uncorrelated)<br>HA: s.c. present at range specified |       |    |        | H0: q=specified lag-1<br>HA: s.c. present at lag specified |       |    |        |
|------------------------------------------------------------------------|-------|----|--------|------------------------------------------------------------|-------|----|--------|
| lags                                                                   | chi2  | df | p-val  | lag                                                        | chi2  | df | p-val  |
| 1 - 1                                                                  | 2.339 | 1  | 0.1261 | 1                                                          | 2.339 | 1  | 0.1261 |
| 1 - 2                                                                  | 2.855 | 2  | 0.2399 | 2                                                          | 0.139 | 1  | 0.7098 |
| 1 - 3                                                                  | 2.932 | 3  | 0.4023 | 3                                                          | 0.000 | 1  | 0.9905 |
| 1 - 4                                                                  | 3.138 | 4  | 0.5350 | 4                                                          | 0.123 | 1  | 0.7259 |
| 1 - 5                                                                  | 4.099 | 5  | 0.5353 | 5                                                          | 1.407 | 1  | 0.2356 |
| 1 - 6                                                                  | 4.773 | 6  | 0.5733 | 6                                                          | 1.192 | 1  | 0.2748 |

Test allows predetermined regressors/instruments  
 Test requires conditional homoskedasticity

## F Global Health Action

Cumby-Huizinga test for autocorrelation (Breusch-Godfrey)  
 H0: variable is MA process up to order q  
 HA: serial correlation present at specified lags >q

| H0: q=0 (serially uncorrelated)<br>HA: s.c. present at range specified |       |    |        | H0: q=specified lag-1<br>HA: s.c. present at lag specified |       |    |        |
|------------------------------------------------------------------------|-------|----|--------|------------------------------------------------------------|-------|----|--------|
| lags                                                                   | chi2  | df | p-val  | lag                                                        | chi2  | df | p-val  |
| 1 - 1                                                                  | 2.373 | 1  | 0.1234 | 1                                                          | 2.373 | 1  | 0.1234 |
| 1 - 2                                                                  | 2.522 | 2  | 0.2833 | 2                                                          | 0.001 | 1  | 0.9751 |
| 1 - 3                                                                  | 3.723 | 3  | 0.2929 | 3                                                          | 0.901 | 1  | 0.3425 |
| 1 - 4                                                                  | 3.932 | 4  | 0.4152 | 4                                                          | 0.000 | 1  | 0.9846 |
| 1 - 5                                                                  | 3.954 | 5  | 0.5561 | 5                                                          | 0.001 | 1  | 0.9708 |
| 1 - 6                                                                  | 5.693 | 6  | 0.4584 | 6                                                          | 0.999 | 1  | 0.3175 |

Test allows predetermined regressors/instruments  
 Test requires conditional homoskedasticity

## I Global Health Research and Policy

Cumby-Huizinga test for autocorrelation (Breusch-Godfrey)  
 H0: variable is MA process up to order q  
 HA: serial correlation present at specified lags >q

| H0: q=0 (serially uncorrelated)<br>HA: s.c. present at range specified |       |    |        | H0: q=specified lag-1<br>HA: s.c. present at lag specified |       |    |        |
|------------------------------------------------------------------------|-------|----|--------|------------------------------------------------------------|-------|----|--------|
| lags                                                                   | chi2  | df | p-val  | lag                                                        | chi2  | df | p-val  |
| 1 - 1                                                                  | 0.059 | 1  | 0.8078 | 1                                                          | 0.059 | 1  | 0.8078 |
| 1 - 2                                                                  | 0.061 | 2  | 0.9701 | 2                                                          | 0.002 | 1  | 0.9637 |
| 1 - 3                                                                  | 4.157 | 3  | 0.2450 | 3                                                          | 4.130 | 1  | 0.0421 |
| 1 - 4                                                                  | 8.952 | 4  | 0.0623 | 4                                                          | 4.228 | 1  | 0.0398 |
| 1 - 5                                                                  | 9.081 | 5  | 0.1059 | 5                                                          | 0.213 | 1  | 0.6448 |
| 1 - 6                                                                  | 9.197 | 6  | 0.1628 | 6                                                          | 0.702 | 1  | 0.4022 |

Test allows predetermined regressors/instruments  
 Test requires conditional homoskedasticity

**J Global Mental Health**

Cumby-Huizinga test for autocorrelation (Breusch-Godfrey)

HO: variable is MA process up to order q  
HA: serial correlation present at specified lags >q

| HO: q=0 (serially uncorrelated)<br>HA: s.c. present at range specified |        |    |        | HO: q=specified lag-1<br>HA: s.c. present at lag specified |       |    |        |
|------------------------------------------------------------------------|--------|----|--------|------------------------------------------------------------|-------|----|--------|
| lags                                                                   | chi2   | df | p-val  | lag                                                        | chi2  | df | p-val  |
| 1 - 1                                                                  | 1.141  | 1  | 0.2855 | 1                                                          | 1.141 | 1  | 0.2855 |
| 1 - 2                                                                  | 3.796  | 2  | 0.1498 | 2                                                          | 2.034 | 1  | 0.1538 |
| 1 - 3                                                                  | 3.867  | 3  | 0.2762 | 3                                                          | 0.050 | 1  | 0.8228 |
| 1 - 4                                                                  | 9.181  | 4  | 0.0567 | 4                                                          | 3.232 | 1  | 0.0722 |
| 1 - 5                                                                  | 9.539  | 5  | 0.0894 | 5                                                          | 0.115 | 1* | 0.7348 |
| 1 - 6                                                                  | 10.859 | 6  | 0.0928 | 6                                                          | 0.001 | 1* | 0.9801 |

Test allows predetermined regressors/instruments  
Test requires conditional homoskedasticity  
\* Eigenvalues adjusted to make matrix positive semidefinite**M International Health**

Cumby-Huizinga test for autocorrelation (Breusch-Godfrey)

HO: variable is MA process up to order q  
HA: serial correlation present at specified lags >q

| HO: q=0 (serially uncorrelated)<br>HA: s.c. present at range specified |       |    |        | HO: q=specified lag-1<br>HA: s.c. present at lag specified |       |    |        |
|------------------------------------------------------------------------|-------|----|--------|------------------------------------------------------------|-------|----|--------|
| lags                                                                   | chi2  | df | p-val  | lag                                                        | chi2  | df | p-val  |
| 1 - 1                                                                  | 0.527 | 1  | 0.4678 | 1                                                          | 0.527 | 1  | 0.4678 |
| 1 - 2                                                                  | 1.450 | 2  | 0.4842 | 2                                                          | 0.757 | 1  | 0.3843 |
| 1 - 3                                                                  | 1.675 | 3  | 0.6425 | 3                                                          | 0.475 | 1  | 0.4907 |
| 1 - 4                                                                  | 4.793 | 4  | 0.3092 | 4                                                          | 2.696 | 1  | 0.1006 |
| 1 - 5                                                                  | 4.797 | 5  | 0.4412 | 5                                                          | 0.066 | 1  | 0.7974 |
| 1 - 6                                                                  | 5.073 | 6  | 0.5344 | 6                                                          | 0.007 | 1  | 0.9324 |

Test allows predetermined regressors/instruments  
Test requires conditional homoskedasticity**P Journal of Global Health**

Cumby-Huizinga test for autocorrelation (Breusch-Godfrey)

HO: variable is MA process up to order q  
HA: serial correlation present at specified lags >q

| HO: q=0 (serially uncorrelated)<br>HA: s.c. present at range specified |       |    |        | HO: q=specified lag-1<br>HA: s.c. present at lag specified |       |    |        |
|------------------------------------------------------------------------|-------|----|--------|------------------------------------------------------------|-------|----|--------|
| lags                                                                   | chi2  | df | p-val  | lag                                                        | chi2  | df | p-val  |
| 1 - 1                                                                  | 1.275 | 1  | 0.2589 | 1                                                          | 1.275 | 1  | 0.2589 |
| 1 - 2                                                                  | 4.195 | 2  | 0.1227 | 2                                                          | 2.154 | 1  | 0.1422 |
| 1 - 3                                                                  | 6.019 | 3  | 0.1107 | 3                                                          | 0.401 | 1  | 0.5265 |
| 1 - 4                                                                  | 6.072 | 4  | 0.1938 | 4                                                          | 0.300 | 1  | 0.5840 |
| 1 - 5                                                                  | 8.117 | 5  | 0.1499 | 5                                                          | 0.833 | 1  | 0.3613 |
| 1 - 6                                                                  | 8.176 | 6  | 0.2255 | 6                                                          | 0.118 | 1  | 0.7318 |

Test allows predetermined regressors/instruments  
Test requires conditional homoskedasticity**K Global Public Health**

Cumby-Huizinga test for autocorrelation (Breusch-Godfrey)

HO: variable is MA process up to order q  
HA: serial correlation present at specified lags >q

| HO: q=0 (serially uncorrelated)<br>HA: s.c. present at range specified |       |    |        | HO: q=specified lag-1<br>HA: s.c. present at lag specified |       |    |        |
|------------------------------------------------------------------------|-------|----|--------|------------------------------------------------------------|-------|----|--------|
| lags                                                                   | chi2  | df | p-val  | lag                                                        | chi2  | df | p-val  |
| 1 - 1                                                                  | 2.495 | 1  | 0.1142 | 1                                                          | 2.495 | 1  | 0.1142 |
| 1 - 2                                                                  | 2.526 | 2  | 0.2828 | 2                                                          | 0.026 | 1  | 0.8717 |
| 1 - 3                                                                  | 2.859 | 3  | 0.4138 | 3                                                          | 0.282 | 1  | 0.5956 |
| 1 - 4                                                                  | 4.342 | 4  | 0.3616 | 4                                                          | 1.940 | 1  | 0.1636 |
| 1 - 5                                                                  | 7.185 | 5  | 0.2072 | 5                                                          | 4.038 | 1  | 0.0445 |
| 1 - 6                                                                  | 7.897 | 6  | 0.2458 | 6                                                          | 1.760 | 1  | 0.1846 |

Test allows predetermined regressors/instruments  
Test requires conditional homoskedasticity**N International Journal of Health Science-IJHS**

Cumby-Huizinga test for autocorrelation (Breusch-Godfrey)

HO: variable is MA process up to order q  
HA: serial correlation present at specified lags >q

| HO: q=0 (serially uncorrelated)<br>HA: s.c. present at range specified |        |    |        | HO: q=specified lag-1<br>HA: s.c. present at lag specified |       |    |        |
|------------------------------------------------------------------------|--------|----|--------|------------------------------------------------------------|-------|----|--------|
| lags                                                                   | chi2   | df | p-val  | lag                                                        | chi2  | df | p-val  |
| 1 - 1                                                                  | 0.928  | 1  | 0.3354 | 1                                                          | 0.928 | 1  | 0.3354 |
| 1 - 2                                                                  | 4.436  | 2  | 0.1089 | 2                                                          | 2.467 | 1  | 0.1163 |
| 1 - 3                                                                  | 4.846  | 3  | 0.1834 | 3                                                          | 1.472 | 1  | 0.2250 |
| 1 - 4                                                                  | 6.905  | 4  | 0.1410 | 4                                                          | 1.078 | 1  | 0.2990 |
| 1 - 5                                                                  | 6.905  | 5  | 0.2278 | 5                                                          | 0.000 | 1* | 0.9969 |
| 1 - 6                                                                  | 15.090 | 6  | 0.0196 | 6                                                          | 0.428 | 1* | 0.5131 |

Test allows predetermined regressors/instruments  
Test requires conditional homoskedasticity  
\* Eigenvalues adjusted to make matrix positive semidefinite**Q Lancet Global Health**

Cumby-Huizinga test for autocorrelation (Breusch-Godfrey)

HO: variable is MA process up to order q  
HA: serial correlation present at specified lags >q

| HO: q=0 (serially uncorrelated)<br>HA: s.c. present at range specified |       |    |        | HO: q=specified lag-1<br>HA: s.c. present at lag specified |       |    |        |
|------------------------------------------------------------------------|-------|----|--------|------------------------------------------------------------|-------|----|--------|
| lags                                                                   | chi2  | df | p-val  | lag                                                        | chi2  | df | p-val  |
| 1 - 1                                                                  | 0.040 | 1  | 0.8415 | 1                                                          | 0.040 | 1  | 0.8415 |
| 1 - 2                                                                  | 1.145 | 2  | 0.5641 | 2                                                          | 1.096 | 1  | 0.2951 |
| 1 - 3                                                                  | 5.082 | 3  | 0.1659 | 3                                                          | 3.523 | 1  | 0.0605 |
| 1 - 4                                                                  | 5.136 | 4  | 0.2736 | 4                                                          | 0.001 | 1  | 0.9730 |
| 1 - 5                                                                  | 7.076 | 5  | 0.2151 | 5                                                          | 2.955 | 1  | 0.0856 |
| 1 - 6                                                                  | 8.607 | 6  | 0.1969 | 6                                                          | 0.560 | 1  | 0.4544 |

Test allows predetermined regressors/instruments  
Test requires conditional homoskedasticity**L Globalization and Health**

Cumby-Huizinga test for autocorrelation (Breusch-Godfrey)

HO: variable is MA process up to order q  
HA: serial correlation present at specified lags >q

| HO: q=0 (serially uncorrelated)<br>HA: s.c. present at range specified |       |    |        | HO: q=specified lag-1<br>HA: s.c. present at lag specified |       |    |        |
|------------------------------------------------------------------------|-------|----|--------|------------------------------------------------------------|-------|----|--------|
| lags                                                                   | chi2  | df | p-val  | lag                                                        | chi2  | df | p-val  |
| 1 - 1                                                                  | 0.057 | 1  | 0.8111 | 1                                                          | 0.057 | 1  | 0.8111 |
| 1 - 2                                                                  | 0.160 | 2  | 0.9231 | 2                                                          | 0.095 | 1  | 0.7576 |
| 1 - 3                                                                  | 0.184 | 3  | 0.9801 | 3                                                          | 0.010 | 1  | 0.9199 |
| 1 - 4                                                                  | 0.567 | 4  | 0.9667 | 4                                                          | 0.444 | 1  | 0.5052 |
| 1 - 5                                                                  | 2.071 | 5  | 0.8392 | 5                                                          | 1.543 | 1  | 0.2141 |
| 1 - 6                                                                  | 2.084 | 6  | 0.9118 | 6                                                          | 0.003 | 1  | 0.9529 |

Test allows predetermined regressors/instruments  
Test requires conditional homoskedasticity**O Journal of Epidemiology and Global Health**

Cumby-Huizinga test for autocorrelation (Breusch-Godfrey)

HO: variable is MA process up to order q  
HA: serial correlation present at specified lags >q

| HO: q=0 (serially uncorrelated)<br>HA: s.c. present at range specified |       |    |        | HO: q=specified lag-1<br>HA: s.c. present at lag specified |       |    |        |
|------------------------------------------------------------------------|-------|----|--------|------------------------------------------------------------|-------|----|--------|
| lags                                                                   | chi2  | df | p-val  | lag                                                        | chi2  | df | p-val  |
| 1 - 1                                                                  | 0.594 | 1  | 0.4410 | 1                                                          | 0.594 | 1  | 0.4410 |
| 1 - 2                                                                  | 1.654 | 2  | 0.4373 | 2                                                          | 0.863 | 1  | 0.3528 |
| 1 - 3                                                                  | 1.854 | 3  | 0.6033 | 3                                                          | 0.043 | 1  | 0.8361 |
| 1 - 4                                                                  | 3.400 | 4  | 0.4932 | 4                                                          | 0.950 | 1  | 0.3296 |
| 1 - 5                                                                  | 3.638 | 5  | 0.6027 | 5                                                          | 0.006 | 1  | 0.9399 |
| 1 - 6                                                                  | 3.660 | 6  | 0.7226 | 6                                                          | 0.084 | 1  | 0.7714 |

Test allows predetermined regressors/instruments  
Test requires conditional homoskedasticity**R Lancet Planetary Health**

Cumby-Huizinga test for autocorrelation (Breusch-Godfrey)

HO: variable is MA process up to order q  
HA: serial correlation present at specified lags >q

| HO: q=0 (serially uncorrelated)<br>HA: s.c. present at range specified |       |    |        | HO: q=specified lag-1<br>HA: s.c. present at lag specified |       |    |        |
|------------------------------------------------------------------------|-------|----|--------|------------------------------------------------------------|-------|----|--------|
| lags                                                                   | chi2  | df | p-val  | lag                                                        | chi2  | df | p-val  |
| 1 - 1                                                                  | 3.385 | 1  | 0.0658 | 1                                                          | 3.385 | 1  | 0.0658 |
| 1 - 2                                                                  | 4.094 | 2  | 0.1291 | 2                                                          | 1.308 | 1  | 0.2528 |
| 1 - 3                                                                  | 4.124 | 3  | 0.2484 | 3                                                          | 0.080 | 1  | 0.7779 |
| 1 - 4                                                                  | 4.320 | 4  | 0.3644 | 4                                                          | 0.320 | 1  | 0.5716 |
| 1 - 5                                                                  | 5.694 | 5  | 0.3371 | 5                                                          | 0.572 | 1  | 0.4494 |
| 1 - 6                                                                  | 8.681 | 6  | 0.1923 | 6                                                          | 3.728 | 1  | 0.0535 |

Test allows predetermined regressors/instruments  
Test requires conditional homoskedasticity

**S Pathogens and Global Health**

Cumby-Huizinga test for autocorrelation (Breusch-Godfrey)

H0: variable is MA process up to order q  
HA: serial correlation present at specified lags >q

| H0: q=0 (serially uncorrelated)<br>HA: s.c. present at range specified |        |    |        | H0: q=specified lag-1<br>HA: s.c. present at lag specified |       |    |        |
|------------------------------------------------------------------------|--------|----|--------|------------------------------------------------------------|-------|----|--------|
| lags                                                                   | chi2   | df | p-val  | lag                                                        | chi2  | df | p-val  |
| 1 - 1                                                                  | 5.243  | 1  | 0.0220 | 1                                                          | 5.243 | 1  | 0.0220 |
| 1 - 2                                                                  | 5.359  | 2  | 0.0686 | 2                                                          | 0.524 | 1  | 0.4693 |
| 1 - 3                                                                  | 6.727  | 3  | 0.0811 | 3                                                          | 1.368 | 1  | 0.2421 |
| 1 - 4                                                                  | 8.821  | 4  | 0.0657 | 4                                                          | 1.379 | 1  | 0.2404 |
| 1 - 5                                                                  | 8.837  | 5  | 0.1157 | 5                                                          | 0.754 | 1  | 0.3853 |
| 1 - 6                                                                  | 12.767 | 6  | 0.0469 | 6                                                          | 3.941 | 1  | 0.0471 |

Test allows predetermined regressors/instruments  
Test requires conditional homoskedasticity**T Tropical Medicine & International Health**

Cumby-Huizinga test for autocorrelation (Breusch-Godfrey)

H0: variable is MA process up to order q  
HA: serial correlation present at specified lags >q

| H0: q=0 (serially uncorrelated)<br>HA: s.c. present at range specified |       |    |        | H0: q=specified lag-1<br>HA: s.c. present at lag specified |       |    |        |
|------------------------------------------------------------------------|-------|----|--------|------------------------------------------------------------|-------|----|--------|
| lags                                                                   | chi2  | df | p-val  | lag                                                        | chi2  | df | p-val  |
| 1 - 1                                                                  | 5.632 | 1  | 0.0176 | 1                                                          | 5.632 | 1  | 0.0176 |
| 1 - 2                                                                  | 5.634 | 2  | 0.0598 | 2                                                          | 0.597 | 1  | 0.4397 |
| 1 - 3                                                                  | 7.316 | 3  | 0.0625 | 3                                                          | 1.782 | 1  | 0.1819 |
| 1 - 4                                                                  | 7.863 | 4  | 0.0967 | 4                                                          | 0.088 | 1  | 0.7662 |
| 1 - 5                                                                  | 7.932 | 5  | 0.1600 | 5                                                          | 0.006 | 1  | 0.9385 |
| 1 - 6                                                                  | 7.949 | 6  | 0.2419 | 6                                                          | 0.039 | 1  | 0.8428 |

Test allows predetermined regressors/instruments  
Test requires conditional homoskedasticity**Figure S1 Auto correlation plots with Cumby-Huizinga general test (up to lag order=6) for non-COVID-19 publications in the included global health journals**

**Note:** We excluded the number of publications from the Global Health-Science and Practice journal for the ITSA analysis since it only publishes the papers in specific months for a year and the interval of time issued is not equal.
